# Supplementary material for: Interactions between whey proteins and cranberry juice after thermal or non-thermal processing duringin vitrogastrointestinal digestion
Source: Royal Society of Chemistry journal article supplement (doi:10.1039/d0fo00177e), 2020-01-01
Supplement: d0fo00177e2.xlsx [file d0fo00177e2.xlsx]

## Sheet: Sample Key
Sample Key
Acronyms	Stands for
W	Water
J	Cranberry juice
WP	Whey Protein
ND	Non-digested
WP	Whey Protein
NP	Non-processing
LT	Long thermal treatment
Gast	Gastric digestion
Intes	Intestinal digestion
Water+WP	Cranberry juice+WP
W LT ND	J LT ND
W NP ND	J NP ND
W LT Gast	J LT Gast
W NP Gast	J NP Gast
W LT Intes	J LT Intes
W NP Intes	J NP Intes

## Sheet:  W LT ND
Protein	Peptide	Precursor	Precursor Charge	Precursor Mz	Peptide Modified Sequence	B1 Total Area
sp|A0JNP2|SG1D_BOVIN"	VKAVLNPSSA	493.2875++	2	493.287	VKAVLNPSSA	2906721024
sp|P00711|LALBA_BOVIN"	DQNPHSSNICN	614.7542++	2	614.754	DQNPHSSNICN	10795146
sp|P00711|LALBA_BOVIN" tr|G9G9X6|G9G9X6_BOVIN"	TQAIVQNND	501.7462++	2	501.746	TQAIVQNND	29243904000
sp|P00711|LALBA_BOVIN" tr|G9G9X6|G9G9X6_BOVIN"	EQLTKCEVFRELKD	869.4456++ 579.9662+++ 435.2265++++	2 3 4	869.445636 579.966183 435.226456	EQLTKCEVFRELKD	21210340864
sp|P00711|LALBA_BOVIN" tr|G9G9X6|G9G9X6_BOVIN"	KLDQWLCEKL	638.3419++	2	638.342	KLDQWLCEKL	426126304
sp|P00711|LALBA_BOVIN" tr|G9G9X6|G9G9X6_BOVIN"	KFLDDDLTD	541.2560++	2	541.256	KFLDDDLTD	5410420736
sp|P00711|LALBA_BOVIN" tr|G9G9X6|G9G9X6_BOVIN"	STEYGLFQINNKIWCKDD	725.3456+++	3	725.346	STEYGLFQINNKIWCKDD	25189594
sp|P00711|LALBA_BOVIN" tr|G9G9X6|G9G9X6_BOVIN"	STEYGLFQINNKIWCKD	1030.0013++ 687.0033+++	2 3	1030.001307 687.003297	STEYGLFQINNKIWCKD	128793950
sp|P00711|LALBA_BOVIN" tr|G9G9X6|G9G9X6_BOVIN"	DTQAIVQNND	559.2596++	2	559.26	DTQAIVQNND	307171840
sp|P00711|LALBA_BOVIN" tr|G9G9X6|G9G9X6_BOVIN"	TTFHTSGYD	514.7196++	2	514.72	TTFHTSGYD	634618496
sp|P00711|LALBA_BOVIN" tr|G9G9X6|G9G9X6_BOVIN"	QWLCEKL	460.2389++	2	460.239	QWLCEKL	1413568640
sp|P00711|LALBA_BOVIN" tr|G9G9X6|G9G9X6_BOVIN"	EQLTKCEVFRE	691.3427++ 461.2309+++	2 3	691.342651 461.23086	EQLTKCEVFRE	861978272
sp|P00711|LALBA_BOVIN" tr|G9G9X6|G9G9X6_BOVIN"	EQLTKCEVFRELK	541.6239+++ 406.4697++++	3 4	541.623869 406.46972	EQLTKCEVFRELK	1051325360
sp|P00711|LALBA_BOVIN" tr|G9G9X6|G9G9X6_BOVIN"	TQAIVQNNDSTEY	741.8390++	2	741.839	TQAIVQNNDSTEY	455053568
sp|P00711|LALBA_BOVIN" tr|G9G9X6|G9G9X6_BOVIN"	SEKLDQWLCEKL	746.3792++ 497.9219+++	2 3	746.379234 497.921915	SEKLDQWLCEKL	476432704
sp|P00711|LALBA_BOVIN" tr|G9G9X6|G9G9X6_BOVIN"	AIVQNNDSTE	545.7542++	2	545.754	AIVQNNDSTE	480117184
sp|P00711|LALBA_BOVIN" tr|G9G9X6|G9G9X6_BOVIN"	DQWLCEKL	517.7524++	2	517.752	DQWLCEKL	312800256
sp|P00711|LALBA_BOVIN" tr|G9G9X6|G9G9X6_BOVIN"	TTFHTSGYDTQAIVQNND	1006.4532++ 671.3046+++	2 3	1006.453233 671.30458	TTFHTSGYDTQAIVQNND	398902008
sp|P00711|LALBA_BOVIN" tr|G9G9X6|G9G9X6_BOVIN"	HTSGYDTQAIVQNND	831.8713++	2	831.871	HTSGYDTQAIVQNND	206680512
sp|P00711|LALBA_BOVIN" tr|G9G9X6|G9G9X6_BOVIN"	RELKDLKGYGGVSL	512.2911+++	3	512.291	RELKDLKGYGGVSL	96236496
sp|P00711|LALBA_BOVIN" tr|G9G9X6|G9G9X6_BOVIN"	EQLTKCEVFRELKDLKG	509.7766++++	4	509.777	EQLTKCEVFRELKDLKG	114084880
sp|P00711|LALBA_BOVIN" tr|G9G9X6|G9G9X6_BOVIN"	IVQNNDSTEYGL	676.8201++	2	676.82	IVQNNDSTEYGL	195599056
sp|P00711|LALBA_BOVIN" tr|G9G9X6|G9G9X6_BOVIN"	TQAIVQNNDSTEYG	770.3497++	2	770.35	TQAIVQNNDSTEYG	235661840
sp|P00711|LALBA_BOVIN" tr|G9G9X6|G9G9X6_BOVIN"	TQAIVQNNDSTE	660.3073++	2	660.307	TQAIVQNNDSTE	176478560
sp|P00711|LALBA_BOVIN" tr|G9G9X6|G9G9X6_BOVIN"	TQAIVQNNDST	595.7860++	2	595.786	TQAIVQNNDST	105563160
sp|P00711|LALBA_BOVIN" tr|G9G9X6|G9G9X6_BOVIN"	STEYGLFQIN	586.2851++	2	586.285	STEYGLFQIN	44106256
sp|P00711|LALBA_BOVIN" tr|G9G9X6|G9G9X6_BOVIN"	NKIWCKD	453.7287++	2	453.729	NKIWCKD	38118244
sp|P00711|LALBA_BOVIN" tr|G9G9X6|G9G9X6_BOVIN"	EQLTKCEVFR	626.8214++ 418.2167+++	2 3	626.821355 418.216662	EQLTKCEVFR	2139047616
sp|P00711|LALBA_BOVIN" tr|G9G9X6|G9G9X6_BOVIN" tr|Q9TRC0|Q9TRC0_BOVIN"	RELKDLKGY	561.3193++ 374.5486+++	2 3	561.319305 374.548629	RELKDLKGY	14220384768
sp|P00711|LALBA_BOVIN" tr|G9G9X6|G9G9X6_BOVIN" tr|Q9TRC0|Q9TRC0_BOVIN"	FRELKDLKGY	423.5714+++	3	423.571	FRELKDLKGY	270010304
sp|P00711|LALBA_BOVIN" tr|G9G9X6|G9G9X6_BOVIN" tr|Q9TRC0|Q9TRC0_BOVIN"	RELKDLKGYGG	412.5629+++	3	412.563	RELKDLKGYGG	173325792
sp|P02662|CASA1_BOVIN"	SDIPNPIGSENSEKTTMPLW	1108.5306++ 739.3562+++	2 3	1108.530626 739.356176	SDIPNPIGSENSEKTTMPLW	2038005568
sp|P02662|CASA1_BOVIN"	HIQKEDVPSE	591.2935++	2	591.293	HIQKEDVPSE	1582386816
sp|P02662|CASA1_BOVIN"	SVEQKHIQKEDVPSE	584.9636+++	3	584.964	SVEQKHIQKEDVPSE	316622272
sp|P02662|CASA1_BOVIN"	IVPNSVEQKHIQKEDVPSER	603.8034++++	4	603.803	IVPNS[+80]VEQKHIQKEDVPSER	175859264
sp|P02662|CASA1_BOVIN"	SDIPNPIGSENSEKTTMPLW	1116.5281++ 744.6878+++	2 3	1116.528083 744.687814	SDIPNPIGSENSEKTTM[+16]PLW	3453793280
sp|P02662|CASA1_BOVIN"	HIQKEDVPSER	669.3440++ 446.5651+++	2 3	669.34404 446.565119	HIQKEDVPSER	17424795520
sp|P02662|CASA1_BOVIN"	HIQKEDVPS	526.7722++ 351.5172+++	2 3	526.772188 351.517217	HIQKEDVPS	3352329504
sp|P02662|CASA1_BOVIN"	IPNPIGSENSEKTTMPLW	1007.5011++ 672.0032+++	2 3	1007.50114 672.003185	IPNPIGSENSEKTTMPLW	612500864
sp|P02662|CASA1_BOVIN"	SVEQKHIQKED	710.8270++ 474.2205+++	2 3	710.827038 474.220451	S[+80]VEQKHIQKED	2097956672
sp|P02662|CASA1_BOVIN"	IPNPIGSENSEKTTMPLW	677.3348+++	3	677.335	IPNPIGSENSEKTTM[+16]PLW	269037120
sp|P02662|CASA1_BOVIN"	HIQKEDVPSERYLGYLEQL	1159.0948++ 773.0656+++ 580.0510++++	2 3 4	1159.094782 773.065613 580.051029	HIQKEDVPSERYLGYLEQL	8790608064
sp|P02662|CASA1_BOVIN"	APSFSDIPNPIGSENSEKTTMPLW	1317.6232++ 878.7513+++	2 3	1317.623243 878.751254	APSFSDIPNPIGSENSEKTTM[+16]PLW	703035584
sp|P02662|CASA1_BOVIN"	HIQKEDVPSERYLG	835.9285++ 557.6214+++ 418.4679++++	2 3 4	835.928468 557.621404 418.467872	HIQKEDVPSERYLG	11484348928
sp|P02662|CASA1_BOVIN"	APSFSDIPNPIGSENSEKTTMPLW	1309.6258++ 873.4196+++	2 3	1309.625786 873.419616	APSFSDIPNPIGSENSEKTTMPLW	829949472
sp|P02662|CASA1_BOVIN"	HIQKEDVPSERYLGYLEQLLRLK	707.6421++++	4	707.642	HIQKEDVPSERYLGYLEQLLRLK	230304320
sp|P02662|CASA1_BOVIN"	HIQKEDVPSERYLGYLEQLLR	647.3473++++	4	647.347	HIQKEDVPSERYLGYLEQLLR	199021840
sp|P02662|CASA1_BOVIN"	IQKEDVPSERYLGYLEQL	727.3793+++	3	727.379	IQKEDVPSERYLGYLEQL	172994688
sp|P02662|CASA1_BOVIN"	IQKEDVPSERY	682.3462++ 455.2333+++	2 3	682.346248 455.233258	IQKEDVPSERY	692282016
sp|P02662|CASA1_BOVIN"	SVEQKHIQKEDVPSER	994.9755++ 663.6528+++ 497.9914++++	2 3 4	994.975493 663.652754 497.991385	S[+80]VEQKHIQKEDVPSER	6267078320
sp|P02662|CASA1_BOVIN"	APSFSDIPNPIGSENSEKTTMPL	1216.5861++ 811.3932+++	2 3	1216.586129 811.393178	APSFSDIPNPIGSENSEKTTMPL	42572664
sp|P02662|CASA1_BOVIN"	IQKEDVPSERYLGYLEQ	689.6846+++	3	689.685	IQKEDVPSERYLGYLEQ	292797312
sp|P02662|CASA1_BOVIN"	SEEIVPNSVEQKHIQKEDVPSER	946.4300+++	3	946.43	S[+80]EEIVPNS[+80]VEQKHIQKEDVPSER	67208936
sp|P02662|CASA1_BOVIN"	HIQKEDVPSERY	750.8757++ 500.9196+++	2 3	750.875704 500.919561	HIQKEDVPSERY	3972593152
sp|P02662|CASA1_BOVIN"	SVEQKHIQKEDVPSERYL	547.0367++++	4	547.037	SVEQKHIQKEDVPSERYL	271701888
sp|P02662|CASA1_BOVIN"	IQKEDVPSE	522.7640++	2	522.764	IQKEDVPSE	313884864
sp|P02662|CASA1_BOVIN"	HIQKEDVPSERYLGYL	974.0022++ 487.5047++++	2 4	974.002164 487.50472	HIQKEDVPSERYLGYL	845874048
sp|P02662|CASA1_BOVIN"	TDAPSFSDIPNPIGSENSEKTTMPLW	1425.6606++ 950.7761+++	2 3	1425.660554 950.776128	TDAPSFSDIPNPIGSENSEKTTM[+16]PLW	692237920
sp|P02662|CASA1_BOVIN"	EDVPSERY	497.7274++	2	497.727	EDVPSERY	627920000
sp|P02662|CASA1_BOVIN"	APSFSDIPNPIGSENSEK	944.9498++	2	944.95	APSFSDIPNPIGSENSEK	191946400
sp|P02662|CASA1_BOVIN"	VEQKHIQKEDVPSER	607.9866+++	3	607.987	VEQKHIQKEDVPSER	56098040
sp|P02662|CASA1_BOVIN"	SVEQKHIQKED	670.8439++ 447.5650+++	2 3	670.843873 447.565007	SVEQKHIQKED	1455323864
sp|P02662|CASA1_BOVIN"	IQKEDVPSER	600.8146++ 400.8788+++	2 3	600.814584 400.878815	IQKEDVPSER	1034300816
sp|P02662|CASA1_BOVIN"	KEDVPSERY	561.7749++ 374.8524+++	2 3	561.774927 374.852377	KEDVPSERY	2019436160
sp|P02662|CASA1_BOVIN"	DIPNPIGSENSEKTTMPLW	1065.0146++	2	1065.01	DIPNPIGSENSEKTTMPLW	143396656
sp|P02662|CASA1_BOVIN"	EDVPSERYLGYLEQL	905.9465++	2	905.947	EDVPSERYLGYLEQL	241132016
sp|P02662|CASA1_BOVIN"	HIQKEDVPSERYL	807.4177++ 538.6142+++	2 3	807.417736 538.614249	HIQKEDVPSERYL	1538461376
sp|P02662|CASA1_BOVIN"	APSFSDIPNPIGSENSEKTTMP	1160.0441++ 773.6985+++	2 3	1160.044097 773.69849	APSFSDIPNPIGSENSEKTTMP	497829984
sp|P02662|CASA1_BOVIN"	TDAPSFSDIPNPIGSENSEKTTMPLW	1417.6631++ 945.4445+++	2 3	1417.663096 945.44449	TDAPSFSDIPNPIGSENSEKTTMPLW	397739432
sp|P02662|CASA1_BOVIN"	NSVEQKHIQKEDVPSER	526.5021++++	4	526.502	NS[+80]VEQKHIQKEDVPSER	33686336
sp|P02662|CASA1_BOVIN"	HIQKEDVPSERYLGYLEQ	1102.5527++ 735.3709+++ 551.7800++++	2 3 4	1102.55275 735.370925 551.780013	HIQKEDVPSERYLGYLEQ	1557028256
sp|P02662|CASA1_BOVIN"	SVEQKHIQKEDVPSERYLG	748.0536+++	3	748.054	SVEQKHIQKEDVPSERYLG	55060600
sp|P02662|CASA1_BOVIN"	APSFSDIPNPIGSENSEKTTMP	779.0301+++	3	779.03	APSFSDIPNPIGSENSEKTTM[+16]P	104949024
sp|P02662|CASA1_BOVIN"	EQKHIQKEDVPSER	574.9638+++	3	574.964	EQKHIQKEDVPSER	26758534
sp|P02662|CASA1_BOVIN"	SVEQKHIQKEDVPSER	954.9923++ 636.9973+++ 477.9998++++	2 3 4	954.992328 636.997311 477.999802	SVEQKHIQKEDVPSER	4457243512
sp|P02662|CASA1_BOVIN"	PIGSENSEKTTMPLW	845.4113++	2	845.411	PIGSENSEKTTMPLW	327504736
sp|P02662|CASA1_BOVIN"	SVEQKHIQKE	409.2227+++	3	409.223	SVEQKHIQKE	61704928
sp|P02662|CASA1_BOVIN"	KEDVPSER	480.2433++	2	480.243	KEDVPSER	34777116
sp|P02662|CASA1_BOVIN"	QKHIQKEDVPSER	531.9496+++	3	531.95	QKHIQKEDVPSER	60568300
sp|P02662|CASA1_BOVIN"	KHIQKEDVPSER	733.3915++ 489.2634+++ 367.1994++++	2 3 4	733.391521 489.26344 367.199399	KHIQKEDVPSER	1468996584
sp|P02662|CASA1_BOVIN"	TDAPSFSDIPNPIGSENSEKTTMP	851.0550+++	3	851.055	TDAPSFSDIPNPIGSENSEKTTM[+16]P	73751848
sp|P02662|CASA1_BOVIN"	EDVPSERYLGYLE	785.3752++	2	785.375	EDVPSERYLGYLE	115621096
sp|P02662|CASA1_BOVIN"	IVPNSVEQKHIQKEDVPSER	583.8118++++	4	583.812	IVPNSVEQKHIQKEDVPSER	93816024
sp|P02662|CASA1_BOVIN"	IPNPIGSENSEKTTMP	857.9195++	2	857.919	IPNPIGSENSEKTTMP	347965536
sp|P02662|CASA1_BOVIN"	HIQKEDVPSERYLGY	917.4601++ 611.9758+++ 459.2337++++	2 3 4	917.460132 611.975847 459.233704	HIQKEDVPSERYLGY	2127023440
sp|P02662|CASA1_BOVIN"	SFSDIPNPIGSENSEKTTMPLW	1233.5783++ 822.7213+++	2 3	1233.578304 822.721295	SFSDIPNPIGSENSEKTTM[+16]PLW	68769812
sp|P02662|CASA1_BOVIN"	SVEQKHIQKEDVPSERY	718.0072+++	3	718.007	S[+80]VEQKHIQKEDVPSERY	49451284
sp|P02662|CASA1_BOVIN"	SVEQKHIQKEDVPSERY	691.3518+++	3	691.352	SVEQKHIQKEDVPSERY	27259726
sp|P02662|CASA1_BOVIN"	HIQKEDVPSERYLGYLE	519.7654++++	4	519.765	HIQKEDVPSERYLGYLE	247332032
sp|P02662|CASA1_BOVIN"	IPNPIGSENSEKTTMPL	914.4615++	2	914.461	IPNPIGSENSEKTTMPL	113651176
sp|P02662|CASA1_BOVIN"	IQKEDVPSERYL	492.9279+++	3	492.928	IQKEDVPSERYL	84194808
sp|P02662|CASA1_BOVIN"	QYTDAPSFSDIPNPIGSENSEKTTMPLW	1571.2215++ 1047.8168+++	2 3	1571.221507 1047.816763	QYTDAPSFSDIPNPIGSENSEKTTM[+16]PLW	152633140
sp|P02662|CASA1_BOVIN"	DAPSFSDIPNPIGSENSEKTTMPLW	917.0936+++	3	917.094	DAPSFSDIPNPIGSENSEKTTM[+16]PLW	30695428
sp|P02662|CASA1_BOVIN"	TQYTDAPSFSDIPNPIGSENSEKTTMPLW	1081.4993+++	3	1081.5	TQYTDAPSFSDIPNPIGSENSEKTTM[+16]PLW	82767536
sp|P02662|CASA1_BOVIN"	QYTDAPSFSDIPNPIGSENSEKTTMPLW	1042.4851+++	3	1042.49	QYTDAPSFSDIPNPIGSENSEKTTMPLW	522207136
sp|P02662|CASA1_BOVIN"	HIQKEDVPSERYLGYLEQLL	1215.6368++	2	1215.64	HIQKEDVPSERYLGYLEQLL	10480005
sp|P02662|CASA1_BOVIN"	IGSENSEKTTMP	655.3006++	2	655.301	IGSENSEKTTM[+16]P	31446652
sp|P02662|CASA1_BOVIN"	IKQMEAESISSSEEIVPNSVEQKHIQKEDVPSER	974.9850++++	4	974.985	IKQM[+16]EAESISSSEEIVPNSVEQKHIQKEDVPSER	61802016
sp|P02662|CASA1_BOVIN"	SVEQKHIQKEDVPSERYLGY	602.0578++++	4	602.058	SVEQKHIQKEDVPSERYLGY	99950640
sp|P02662|CASA1_BOVIN"	YYVPLGTQYTDAPSFSDIPNPIGSENSEKTTMP	1207.2310+++	3	1207.23	YYVPLGTQYTDAPSFSDIPNPIGSENSEKTTMP	38233472
sp|P02662|CASA1_BOVIN" tr|B5B3R8|B5B3R8_BOVIN"	YKVPQLEIVPNSAEERLHS	737.0586+++	3	737.059	YKVPQLEIVPNSAEERLHS	275465056
sp|P02662|CASA1_BOVIN" tr|B5B3R8|B5B3R8_BOVIN"	IGSESTEDQAMEDIK	834.8671++	2	834.867	IGSESTEDQAM[+16]EDIK	552970304
sp|P02662|CASA1_BOVIN" tr|B5B3R8|B5B3R8_BOVIN"	VAPFPEVFGKEKVNELS	945.5040++ 630.6718+++	2 3	945.504009 630.671764	VAPFPEVFGKEKVNELS	2886811584
sp|P02662|CASA1_BOVIN" tr|B5B3R8|B5B3R8_BOVIN"	EKVNELSKD	531.2773++	2	531.277	EKVNELSKD	7189028864
sp|P02662|CASA1_BOVIN" tr|B5B3R8|B5B3R8_BOVIN"	VPSERYLGYLE	663.3404++	2	663.34	VPSERYLGYLE	1332451200
sp|P02662|CASA1_BOVIN" tr|B5B3R8|B5B3R8_BOVIN"	FVAPFPEVFGKE	683.8557++	2	683.856	FVAPFPEVFGKE	593653760
sp|P02662|CASA1_BOVIN" tr|B5B3R8|B5B3R8_BOVIN"	VPSERYLGYLEQL	783.9118++	2	783.912	VPSERYLGYLEQL	924830592
sp|P02662|CASA1_BOVIN" tr|B5B3R8|B5B3R8_BOVIN"	YKVPQLEIVPN	650.3690++	2	650.369	YKVPQLEIVPN	1594487936
sp|P02662|CASA1_BOVIN" tr|B5B3R8|B5B3R8_BOVIN"	VAPFPEVFGKEK	674.3690++ 449.9151+++	2 3	674.368995 449.915089	VAPFPEVFGKEK	9047596544
sp|P02662|CASA1_BOVIN" tr|B5B3R8|B5B3R8_BOVIN"	RPKHPIKHQGLPQEVL	939.0470++ 626.3671+++ 470.0272++++	2 3 4	939.047044 626.367121 470.02716	RPKHPIKHQGLPQEVL	140364669952
sp|P02662|CASA1_BOVIN" tr|B5B3R8|B5B3R8_BOVIN"	FVAPFPEVFGK	619.3344++	2	619.334	FVAPFPEVFGK	7221414400
sp|P02662|CASA1_BOVIN" tr|B5B3R8|B5B3R8_BOVIN"	FVAPFPEVFGKEKVNELS	679.6946+++	3	679.695	FVAPFPEVFGKEKVNELS	1204951680
sp|P02662|CASA1_BOVIN" tr|B5B3R8|B5B3R8_BOVIN"	FVAPFPEVFGKEKV	797.4374++ 531.9607+++	2 3	797.437409 531.960698	FVAPFPEVFGKEKV	8743711360
sp|P02662|CASA1_BOVIN" tr|B5B3R8|B5B3R8_BOVIN"	EVLNENLLRF	623.8431++	2	623.843	EVLNENLLRF	8615778304
sp|P02662|CASA1_BOVIN" tr|B5B3R8|B5B3R8_BOVIN"	VAPFPEVFGK	545.8002++	2	545.8	VAPFPEVFGK	7838740480
sp|P02662|CASA1_BOVIN" tr|B5B3R8|B5B3R8_BOVIN"	EGIHAQQKEPMIGVNQELAYFYPE	936.4497+++	3	936.45	EGIHAQQKEPM[+16]IGVNQELAYFYPE	703641664
sp|P02662|CASA1_BOVIN" tr|B5B3R8|B5B3R8_BOVIN"	VPQLEIVPNSAEERLHSMK	753.0397+++ 565.0316++++	3 4	753.039732 565.031618	VPQLEIVPNS[+80]AEERLHSMK	1894072576
sp|P02662|CASA1_BOVIN" tr|B5B3R8|B5B3R8_BOVIN"	APFPEVFGKEKVNELS	597.6490+++	3	597.649	APFPEVFGKEKVNELS	721726784
sp|P02662|CASA1_BOVIN" tr|B5B3R8|B5B3R8_BOVIN"	KEGIHAQQKEPMIGVNQELA	740.7196+++ 555.7915++++	3 4	740.71956 555.791489	KEGIHAQQKEPMIGVNQELA	715905216
sp|P02662|CASA1_BOVIN" tr|B5B3R8|B5B3R8_BOVIN"	YVPLGTQYTDAPSFSD	880.9043++	2	880.904	YVPLGTQYTDAPSFSD	200375872
sp|P02662|CASA1_BOVIN" tr|B5B3R8|B5B3R8_BOVIN"	EKVNELSKDIGSESTEDQAMEDIK	1356.1318++ 904.4236+++ 678.5696++++	2 3 4	1356.131826 904.423643 678.569551	EKVNELSKDIGSESTEDQAM[+16]EDIK	4019450112
sp|P02662|CASA1_BOVIN" tr|B5B3R8|B5B3R8_BOVIN"	VAPFPEVFGKEKV	723.9032++ 482.9379+++	2 3	723.903202 482.937893	VAPFPEVFGKEKV	12667993600
sp|P02662|CASA1_BOVIN" tr|B5B3R8|B5B3R8_BOVIN"	KEGIHAQQKEPMIGVNQELAY	795.0740+++ 596.5573++++	3 4	795.074003 596.557321	KEGIHAQQKEPMIGVNQELAY	1087270528
sp|P02662|CASA1_BOVIN" tr|B5B3R8|B5B3R8_BOVIN"	VPQLEIVPNSAEERLHSM	1025.0253++ 683.6860+++	2 3	1025.025314 683.685968	VPQLEIVPNSAEERLHSM	1610778080
sp|P02662|CASA1_BOVIN" tr|B5B3R8|B5B3R8_BOVIN"	RPKHPIKHQGLPQEVLNENL	1174.1533++ 783.1046+++ 587.5803++++	2 3 4	1174.1533 783.104625 587.580288	RPKHPIKHQGLPQEVLNENL	99352764288
sp|P02662|CASA1_BOVIN" tr|B5B3R8|B5B3R8_BOVIN"	FVAPFPEVFGKEK	747.9032++ 498.9379+++	2 3	747.903202 498.937893	FVAPFPEVFGKEK	23295006720
sp|P02662|CASA1_BOVIN" tr|B5B3R8|B5B3R8_BOVIN"	KEGIHAQQKEPMIGVNQE	684.6775+++	3	684.677	KEGIHAQQKEPM[+16]IGVNQE	181266432
sp|P02662|CASA1_BOVIN" tr|B5B3R8|B5B3R8_BOVIN"	LKKYKVPQLEIVPNSAEER	561.0705++++	4	561.07	LKKYKVPQLEIVPNSAEER	702526592
sp|P02662|CASA1_BOVIN" tr|B5B3R8|B5B3R8_BOVIN"	FVAPFPEVFGKEKVNEL	975.5222++ 650.6839+++	2 3	975.522201 650.683893	FVAPFPEVFGKEKVNEL	1345591552
sp|P02662|CASA1_BOVIN" tr|B5B3R8|B5B3R8_BOVIN"	RPKHPIKHQGLPQEVLNEN	1117.6113++ 745.4099+++ 559.3093++++	2 3 4	1117.611268 745.409937 559.309272	RPKHPIKHQGLPQEVLNEN	48856976512
sp|P02662|CASA1_BOVIN" tr|B5B3R8|B5B3R8_BOVIN"	HPIKHQGLPQEVLNENLLRF	794.7729+++ 596.3315++++	3 4	794.772875 596.331476	HPIKHQGLPQEVLNENLLRF	762729920
sp|P02662|CASA1_BOVIN" tr|B5B3R8|B5B3R8_BOVIN"	RPKHPIKHQGLPQEVLNENLL	1230.6953++ 820.7993+++ 615.8513++++	2 3 4	1230.695332 820.799313 615.851304	RPKHPIKHQGLPQEVLNENLL	111284049664
sp|P02662|CASA1_BOVIN" tr|B5B3R8|B5B3R8_BOVIN"	KEGIHAQQKEPM	471.2381+++	3	471.238	KEGIHAQQKEPM[+16]	243103600
sp|P02662|CASA1_BOVIN" tr|B5B3R8|B5B3R8_BOVIN"	NELSKDIGSESTED	762.3390++	2	762.339	NELSKDIGSESTED	649840960
sp|P02662|CASA1_BOVIN" tr|B5B3R8|B5B3R8_BOVIN"	KHQGLPQEVLNENLLRF	679.0410+++ 509.5325++++	3 4	679.040962 509.532541	KHQGLPQEVLNENLLRF	237182152
sp|P02662|CASA1_BOVIN" tr|B5B3R8|B5B3R8_BOVIN"	EKVNELSKDIGSESTEDQAMEDIK	1348.1344++ 899.0920+++ 674.5708++++	2 3 4	1348.134369 899.092005 674.570822	EKVNELSKDIGSESTEDQAMEDIK	4735628416
sp|P02662|CASA1_BOVIN" tr|B5B3R8|B5B3R8_BOVIN"	VPSERYLGYLEQ	727.3697++	2	727.37	VPSERYLGYLEQ	1178303744
sp|P02662|CASA1_BOVIN" tr|B5B3R8|B5B3R8_BOVIN"	EKVNELSKDIGSESTEDQAMEDIK	952.4029+++	3	952.403	EKVNELSKDIGS[+80]ES[+80]TEDQAMEDIK	1014859712
sp|P02662|CASA1_BOVIN" tr|B5B3R8|B5B3R8_BOVIN"	EKVNELSKDIGSESTEDQAMEDIK	952.4029+++	3	952.403	EKVNELS[+80]KDIGSES[+80]TEDQAMEDIK	1014859712
sp|P02662|CASA1_BOVIN" tr|B5B3R8|B5B3R8_BOVIN"	NENLLRF	453.2456++	2	453.246	NENLLRF	13620158464
sp|P02662|CASA1_BOVIN" tr|B5B3R8|B5B3R8_BOVIN"	VNELSKDIG	487.7613++	2	487.761	VNELSKDIG	1295301376
sp|P02662|CASA1_BOVIN" tr|B5B3R8|B5B3R8_BOVIN"	HQGLPQEVLNENLLRF	954.0103++ 636.3426+++	2 3	954.010324 636.342641	HQGLPQEVLNENLLRF	162639660
sp|P02662|CASA1_BOVIN" tr|B5B3R8|B5B3R8_BOVIN"	HPIKHQGLPQEV	461.5895+++	3	461.589	HPIKHQGLPQEV	236670880
sp|P02662|CASA1_BOVIN" tr|B5B3R8|B5B3R8_BOVIN"	EIVPNSVEQK	611.7894++	2	611.789	EIVPNS[+80]VEQK	838293056
sp|P02662|CASA1_BOVIN" tr|B5B3R8|B5B3R8_BOVIN"	EKVNELSKDIGSESTEDQAMED	818.6990+++	3	818.699	EKVNELSKDIGSESTEDQAMED	1540701440
sp|P02662|CASA1_BOVIN" tr|B5B3R8|B5B3R8_BOVIN"	NENLLRFF	526.7798++	2	526.78	NENLLRFF	3014889728
sp|P02662|CASA1_BOVIN" tr|B5B3R8|B5B3R8_BOVIN"	LSKDIGSESTED	640.7963++	2	640.796	LSKDIGSESTED	70376592
sp|P02662|CASA1_BOVIN" tr|B5B3R8|B5B3R8_BOVIN"	FFVAPFPEVFGKEKVNEL	699.7067+++	3	699.707	FFVAPFPEVFGKEKVNEL	85960424
sp|P02662|CASA1_BOVIN" tr|B5B3R8|B5B3R8_BOVIN"	LKKYKVPQLEIVPNSAEERLHSM	678.1244++++	4	678.124	LKKYKVPQLEIVPNSAEERLHSM	343984256
sp|P02662|CASA1_BOVIN" tr|B5B3R8|B5B3R8_BOVIN"	NELSKDIGSESTEDQAMED	1049.4419++	2	1049.44	NELSKDIGSESTEDQAMED	74851720
sp|P02662|CASA1_BOVIN" tr|B5B3R8|B5B3R8_BOVIN"	YKVPQLEIVPNSAEERLHSM	780.7387+++ 585.8059++++	3 4	780.738732 585.805868	YKVPQLEIVPNSAEERLHSM	1587492352
sp|P02662|CASA1_BOVIN" tr|B5B3R8|B5B3R8_BOVIN"	VAPFPEVFGKEKVNEL	901.9880++ 601.6611+++	2 3	901.987994 601.661088	VAPFPEVFGKEKVNEL	3746654208
sp|P02662|CASA1_BOVIN" tr|B5B3R8|B5B3R8_BOVIN"	IVPNSVEQK	547.2681++	2	547.268	IVPNS[+80]VEQK	634278208
sp|P02662|CASA1_BOVIN" tr|B5B3R8|B5B3R8_BOVIN"	KEGIHAQQKEPMIGVNQEL	722.3722+++ 542.0309++++	3 4	722.37216 542.030939	KEGIHAQQKEPM[+16]IGVNQEL	922520544
sp|P02662|CASA1_BOVIN" tr|B5B3R8|B5B3R8_BOVIN"	VAPFPEVFG	481.7527++	2	481.753	VAPFPEVFG	349947680
sp|P02662|CASA1_BOVIN" tr|B5B3R8|B5B3R8_BOVIN"	APFPEVFGKEKV	674.3690++ 449.9151+++	2 3	674.368995 449.915089	APFPEVFGKEKV	2629922752
sp|P02662|CASA1_BOVIN" tr|B5B3R8|B5B3R8_BOVIN"	KYKVPQLEIVPNSAEERLHSM	850.0925+++ 637.8212++++	3 4	850.092496 637.821191	KYKVPQLEIVPNS[+80]AEERLHSM	3041631232
sp|P02662|CASA1_BOVIN" tr|B5B3R8|B5B3R8_BOVIN"	HPIKHQGLPQEVLNENLL	1040.0709++ 693.7164+++ 520.5391++++	2 3 4	1040.070913 693.716367 520.539094	HPIKHQGLPQEVLNENLL	6987461056
sp|P02662|CASA1_BOVIN" tr|B5B3R8|B5B3R8_BOVIN"	EKVNELSKDIGSESTEDQAMEDIK	925.7474+++	3	925.747	EKVNELSKDIGSES[+80]TEDQAMEDIK	1128608640
sp|P02662|CASA1_BOVIN" tr|B5B3R8|B5B3R8_BOVIN"	EKVNELSKDIGSESTEDQAMEDIK	925.7474+++	3	925.747	EKVNELS[+80]KDIGSESTEDQAMEDIK	1128608640
sp|P02662|CASA1_BOVIN" tr|B5B3R8|B5B3R8_BOVIN"	VPQLEIVPNSAEERLHSM	710.3414+++	3	710.341	VPQLEIVPNS[+80]AEERLHSM	1292391296
sp|P02662|CASA1_BOVIN" tr|B5B3R8|B5B3R8_BOVIN"	VAPFPEVFGKEKVNELSKDIGSESTEDQAMEDIK	982.4478++++	4	982.448	VAPFPEVFGKEKVNELS[+80]KDIGS[+80]ESTEDQAMEDIK	281458560
sp|P02662|CASA1_BOVIN" tr|B5B3R8|B5B3R8_BOVIN"	EKVNELSKDIGSESTED	940.4420++ 627.2971+++	2 3	940.441999 627.297091	EKVNELSKDIGSESTED	4000593664
sp|P02662|CASA1_BOVIN" tr|B5B3R8|B5B3R8_BOVIN"	FFVAPFPEVFGKEKVNELSKD	809.7580+++	3	809.758	FFVAPFPEVFGKEKVNELSKD	21685936
sp|P02662|CASA1_BOVIN" tr|B5B3R8|B5B3R8_BOVIN"	SAEERLHSM	530.2480++	2	530.248	SAEERLHSM	2023871104
sp|P02662|CASA1_BOVIN" tr|B5B3R8|B5B3R8_BOVIN"	GLPQEVLNENLLRF	821.4516++ 547.9701+++	2 3	821.451579 547.970145	GLPQEVLNENLLRF	1681478016
sp|P02662|CASA1_BOVIN" tr|B5B3R8|B5B3R8_BOVIN"	VAPFPEVFGKEKVNE	845.4460++ 563.9664+++	2 3	845.445962 563.9664	VAPFPEVFGKEKVNE	1578769248
sp|P02662|CASA1_BOVIN" tr|B5B3R8|B5B3R8_BOVIN"	RPKHPIKHQGLPQEVLNENLLR	872.8330+++ 654.8766++++	3 4	872.833017 654.876582	RPKHPIKHQGLPQEVLNENLLR	7634371584
sp|P02662|CASA1_BOVIN" tr|B5B3R8|B5B3R8_BOVIN"	LKKYKVPQLEIVPNSAEERLHSM	930.4855+++ 698.1159++++	3 4	930.485505 698.115948	LKKYKVPQLEIVPNS[+80]AEERLHSM	1835939392
sp|P02662|CASA1_BOVIN" tr|B5B3R8|B5B3R8_BOVIN"	KHPIKHQGLPQEVLNENLL	736.4147+++	3	736.415	KHPIKHQGLPQEVLNENLL	3636882432
sp|P02662|CASA1_BOVIN" tr|B5B3R8|B5B3R8_BOVIN"	LNENLLRF	509.7876++	2	509.788	LNENLLRF	989673728
sp|P02662|CASA1_BOVIN" tr|B5B3R8|B5B3R8_BOVIN"	FVAPFPEVFGKEKVNELSK	722.3929+++ 542.0465++++	3 4	722.39289 542.046487	FVAPFPEVFGKEKVNELSK	3750809472
sp|P02662|CASA1_BOVIN" tr|B5B3R8|B5B3R8_BOVIN"	GKEKVNELSKD	623.8355++ 416.2261+++	2 3	623.835516 416.226103	GKEKVNELSKD	1347144320
sp|P02662|CASA1_BOVIN" tr|B5B3R8|B5B3R8_BOVIN"	RPKHPIKHQ	380.8965+++	3	380.896	RPKHPIKHQ	816920896
sp|P02662|CASA1_BOVIN" tr|B5B3R8|B5B3R8_BOVIN"	FFVAPFPEVFGKEKVNELS	728.7174+++	3	728.717	FFVAPFPEVFGKEKVNELS	24435852
sp|P02662|CASA1_BOVIN" tr|B5B3R8|B5B3R8_BOVIN"	VAPFPEVFGKEKVNELSKD	1067.0650++ 711.7124+++ 534.0361++++	2 3 4	1067.064962 711.7124 534.036119	VAPFPEVFGKEKVNELSKD	12362184832
sp|P02662|CASA1_BOVIN" tr|B5B3R8|B5B3R8_BOVIN"	QELAYFYPE	580.2689++	2	580.269	QELAYFYPE	148993456
sp|P02662|CASA1_BOVIN" tr|B5B3R8|B5B3R8_BOVIN"	YKVPQLEIVPNSAEERLHS	763.7140+++	3	763.714	YKVPQLEIVPNS[+80]AEERLHS	193352864
sp|P02662|CASA1_BOVIN" tr|B5B3R8|B5B3R8_BOVIN"	RPKHPIKHQGLPQEVLNE	1060.5898++ 707.3956+++ 530.7985++++	2 3 4	1060.589804 707.395628 530.79854	RPKHPIKHQGLPQEVLNE	17501189664
sp|P02662|CASA1_BOVIN" tr|B5B3R8|B5B3R8_BOVIN"	KHPIKHQGLPQEVLNENLLRF	628.3552++++	4	628.355	KHPIKHQGLPQEVLNENLLRF	647330688
sp|P02662|CASA1_BOVIN" tr|B5B3R8|B5B3R8_BOVIN"	SKDIGSESTEDQAMED	879.3545++	2	879.355	SKDIGSESTEDQAM[+16]ED	114769688
sp|P02662|CASA1_BOVIN" tr|B5B3R8|B5B3R8_BOVIN"	DIGSESTEDQAMEDIK	884.3831++	2	884.383	DIGSESTEDQAMEDIK	206483472
sp|P02662|CASA1_BOVIN" tr|B5B3R8|B5B3R8_BOVIN"	NLLRFF	405.2371++	2	405.237	NLLRFF	91244688
sp|P02662|CASA1_BOVIN" tr|B5B3R8|B5B3R8_BOVIN"	KVPQLEIVPNSAEER	570.3125+++	3	570.312	KVPQLEIVPNSAEER	328695776
sp|P02662|CASA1_BOVIN" tr|B5B3R8|B5B3R8_BOVIN"	KEGIHAQQKEPMIGVNQEL	717.0405+++ 538.0322++++	3 4	717.040522 538.03221	KEGIHAQQKEPMIGVNQEL	1241231936
sp|P02662|CASA1_BOVIN" tr|B5B3R8|B5B3R8_BOVIN"	RPKHPIKHQGLPQ	768.4495++ 512.6354+++	2 3	768.449508 512.635431	RPKHPIKHQGLPQ	18318595648
sp|P02662|CASA1_BOVIN" tr|B5B3R8|B5B3R8_BOVIN"	VAPFPEVFGKEKVNELSKDIGSESTEDQAMEDIK	962.4562++++	4	962.456	VAPFPEVFGKEKVNELS[+80]KDIGSESTEDQAMEDIK	96249472
sp|P02662|CASA1_BOVIN" tr|B5B3R8|B5B3R8_BOVIN"	DVPSERYLGYLEQL	841.4252++	2	841.425	DVPSERYLGYLEQL	221956960
sp|P02662|CASA1_BOVIN" tr|B5B3R8|B5B3R8_BOVIN"	EGIHAQQKEPMIGVNQELAY	752.3757+++	3	752.376	EGIHAQQKEPMIGVNQELAY	447756960
sp|P02662|CASA1_BOVIN" tr|B5B3R8|B5B3R8_BOVIN"	VAPFPEVFGKEKVNELSK	1009.5515++ 673.3701+++ 505.2794++++	2 3 4	1009.55149 673.370085 505.279383	VAPFPEVFGKEKVNELSK	4199449872
sp|P02662|CASA1_BOVIN" tr|B5B3R8|B5B3R8_BOVIN"	FVAPFPEVFGKEKVNELSKDIG	817.4370+++ 613.3296++++	3 4	817.437047 613.329604	FVAPFPEVFGKEKVNELSKDIG	208328592
sp|P02662|CASA1_BOVIN" tr|B5B3R8|B5B3R8_BOVIN"	EKVNELSKDIGSESTEDQAMED	824.0306+++	3	824.031	EKVNELSKDIGSESTEDQAM[+16]ED	784792256
sp|P02662|CASA1_BOVIN" tr|B5B3R8|B5B3R8_BOVIN"	KVPQLEIVPNSAEERLHSM	753.0397+++	3	753.04	KVPQLEIVPNS[+80]AEERLHSM	683035840
sp|P02662|CASA1_BOVIN" tr|B5B3R8|B5B3R8_BOVIN"	LPQEVLNENLLRF	792.9408++	2	792.941	LPQEVLNENLLRF	177184176
sp|P02662|CASA1_BOVIN" tr|B5B3R8|B5B3R8_BOVIN"	KEGIHAQQKEPMIGVN	593.6454+++	3	593.645	KEGIHAQQKEPMIGVN	138798208
sp|P02662|CASA1_BOVIN" tr|B5B3R8|B5B3R8_BOVIN"	EIVPNSAEERLHSM	543.2630+++	3	543.263	EIVPNSAEERLHSM[+16]	196407328
sp|P02662|CASA1_BOVIN" tr|B5B3R8|B5B3R8_BOVIN"	ERYLGYLEQLL	698.8772++	2	698.877	ERYLGYLEQLL	24192492
sp|P02662|CASA1_BOVIN" tr|B5B3R8|B5B3R8_BOVIN"	VPQLEIVPN	504.7898++	2	504.79	VPQLEIVPN	407424928
sp|P02662|CASA1_BOVIN" tr|B5B3R8|B5B3R8_BOVIN"	APFPEVFGKEKVNEL	568.6383+++	3	568.638	APFPEVFGKEKVNEL	136816608
sp|P02662|CASA1_BOVIN" tr|B5B3R8|B5B3R8_BOVIN"	KEGIHAQQKEPMIGVNQ	641.6633+++	3	641.663	KEGIHAQQKEPM[+16]IGVNQ	295866176
sp|P02662|CASA1_BOVIN" tr|B5B3R8|B5B3R8_BOVIN"	RPKHPIKHQGLP	469.9492+++ 352.7137++++	3 4	469.949238 352.713748	RPKHPIKHQGLP	299091216
sp|P02662|CASA1_BOVIN" tr|B5B3R8|B5B3R8_BOVIN"	KYKVPQLEIVPNSAEERLH	777.4017+++ 583.3031++++	3 4	777.401659 583.303063	KYKVPQLEIVPNS[+80]AEERLH	1150282944
sp|P02662|CASA1_BOVIN" tr|B5B3R8|B5B3R8_BOVIN"	IVPNSVEQK	507.2849++	2	507.285	IVPNSVEQK	378062144
sp|P02662|CASA1_BOVIN" tr|B5B3R8|B5B3R8_BOVIN"	VPQLEIVPNSAEERLHSMK	726.3843+++	3	726.384	VPQLEIVPNSAEERLHSMK	362157952
sp|P02662|CASA1_BOVIN" tr|B5B3R8|B5B3R8_BOVIN"	EGIHAQQKEPMIGVNQELAYFYPE	931.1180+++	3	931.118	EGIHAQQKEPMIGVNQELAYFYPE	309740736
sp|P02662|CASA1_BOVIN" tr|B5B3R8|B5B3R8_BOVIN"	IGSESTEDQAMEDIK	826.8696++	2	826.87	IGSESTEDQAMEDIK	549830912
sp|P02662|CASA1_BOVIN" tr|B5B3R8|B5B3R8_BOVIN"	QGLPQEVLNENLLRF	885.4809++	2	885.481	QGLPQEVLNENLLRF	24079718
sp|P02662|CASA1_BOVIN" tr|B5B3R8|B5B3R8_BOVIN"	NELSKDIG	438.2271++	2	438.227	NELSKDIG	519072960
sp|P02662|CASA1_BOVIN" tr|B5B3R8|B5B3R8_BOVIN"	IKQMEAESISSSEEIVPNSVEQK	860.0899+++	3	860.09	IKQM[+16]EAESISSSEEIVPNSVEQK	423545344
sp|P02662|CASA1_BOVIN" tr|B5B3R8|B5B3R8_BOVIN"	VNELSKDIGSESTEDQAMEDIK	840.0349+++	3	840.035	VNELSKDIGSES[+80]TEDQAMEDIK	150825456
sp|P02662|CASA1_BOVIN" tr|B5B3R8|B5B3R8_BOVIN"	YKVPQLEIVPNSAEERLHSMK	850.0925+++ 637.8212++++	3 4	850.092496 637.821191	YKVPQLEIVPNS[+80]AEERLHSMK	1603496320
sp|P02662|CASA1_BOVIN" tr|B5B3R8|B5B3R8_BOVIN"	EGIHAQQKEPMIGVNQELAY	757.7073+++	3	757.707	EGIHAQQKEPM[+16]IGVNQELAY	390569024
sp|P02662|CASA1_BOVIN" tr|B5B3R8|B5B3R8_BOVIN"	FFVAPFPEVFGK	692.8686++	2	692.869	FFVAPFPEVFGK	58439276
sp|P02662|CASA1_BOVIN" tr|B5B3R8|B5B3R8_BOVIN"	YKVPQLEIVPNSAEERLHSM	807.3942+++ 605.7975++++	3 4	807.394175 605.79745	YKVPQLEIVPNS[+80]AEERLHSM	1922031568
sp|P02662|CASA1_BOVIN" tr|B5B3R8|B5B3R8_BOVIN"	IKQMEAESISSSEEIVPNSVEQK	854.7583+++	3	854.758	IKQMEAESISSSEEIVPNSVEQK	701497600
sp|P02662|CASA1_BOVIN" tr|B5B3R8|B5B3R8_BOVIN"	VPSERYLGY	542.2771++	2	542.277	VPSERYLGY	844893504
sp|P02662|CASA1_BOVIN" tr|B5B3R8|B5B3R8_BOVIN"	KHPIKHQGLPQEVL	812.4701++ 541.9825+++ 406.7387++++	2 3 4	812.470106 541.982496 406.738691	KHPIKHQGLPQEVL	4575675072
sp|P02662|CASA1_BOVIN" tr|B5B3R8|B5B3R8_BOVIN"	GLPQEVLNENLL	669.8668++	2	669.867	GLPQEVLNENLL	634817216
sp|P02662|CASA1_BOVIN" tr|B5B3R8|B5B3R8_BOVIN"	YKVPQLEIVPNSAEER	936.4967++ 624.6669+++	2 3	936.496715 624.666902	YKVPQLEIVPNSAEER	1648739616
sp|P02662|CASA1_BOVIN" tr|B5B3R8|B5B3R8_BOVIN"	EKVNELSKDIGSESTEDQAME	780.3567+++	3	780.357	EKVNELSKDIGSESTEDQAME	109749840
sp|P02662|CASA1_BOVIN" tr|B5B3R8|B5B3R8_BOVIN"	KYKVPQLEIVPNSAEERLHSMK	669.8449++++	4	669.845	KYKVPQLEIVPNS[+80]AEERLHSMK	729226880
sp|P02662|CASA1_BOVIN" tr|B5B3R8|B5B3R8_BOVIN"	YKVPQLEIVPNSAEERLH	531.2877++++	4	531.288	YKVPQLEIVPNSAEERLH	245545632
sp|P02662|CASA1_BOVIN" tr|B5B3R8|B5B3R8_BOVIN"	APFPEVFGKEKVNELSKD	678.6896+++	3	678.69	APFPEVFGKEKVNELSKD	121760920
sp|P02662|CASA1_BOVIN" tr|B5B3R8|B5B3R8_BOVIN"	VPQLEIVPNSAEERLH	955.9722++ 637.6506+++	2 3	955.972222 637.650574	VPQLEIVPNS[+80]AEERLH	604026832
sp|P02662|CASA1_BOVIN" tr|B5B3R8|B5B3R8_BOVIN"	QAMEDIK	417.7049++	2	417.705	QAMEDIK	309895360
sp|P02662|CASA1_BOVIN" tr|B5B3R8|B5B3R8_BOVIN"	VNELSKDIGSESTED	811.8732++	2	811.873	VNELSKDIGSESTED	1078231424
sp|P02662|CASA1_BOVIN" tr|B5B3R8|B5B3R8_BOVIN"	YKVPQLEIVPNSAE	833.9080++	2	833.908	YKVPQLEIVPNS[+80]AE	110210032
sp|P02662|CASA1_BOVIN" tr|B5B3R8|B5B3R8_BOVIN"	VAPFPEVFGKEKVNELSKDIG	768.4142+++	3	768.414	VAPFPEVFGKEKVNELSKDIG	843225664
sp|P02662|CASA1_BOVIN" tr|B5B3R8|B5B3R8_BOVIN"	GKEKVNELSKDIGSESTED	715.6580+++	3	715.658	GKEKVNELSKDIGSES[+80]TED	190774176
sp|P02662|CASA1_BOVIN" tr|B5B3R8|B5B3R8_BOVIN"	KVPQLEIVPNSAEERLHSMK	597.0554++++	4	597.055	KVPQLEIVPNS[+80]AEERLHSMK	315566912
sp|P02662|CASA1_BOVIN" tr|B5B3R8|B5B3R8_BOVIN"	GKEKVNELSKDIG	472.9279+++	3	472.928	GKEKVNELSKDIG	469132096
sp|P02662|CASA1_BOVIN" tr|B5B3R8|B5B3R8_BOVIN"	FVAPFPEVFGKEKVNELSKD	1140.5992++ 760.7352+++ 570.8032++++	2 3 4	1140.599169 760.735204 570.803222	FVAPFPEVFGKEKVNELSKD	4935753032
sp|P02662|CASA1_BOVIN" tr|B5B3R8|B5B3R8_BOVIN"	RPKHPIKHQGLPQEV	882.5050++ 588.6724+++ 441.7561++++	2 3 4	882.505012 588.672433 441.756144	RPKHPIKHQGLPQEV	6184553348
sp|P02662|CASA1_BOVIN" tr|B5B3R8|B5B3R8_BOVIN"	LNENLLRFF	583.3218++	2	583.322	LNENLLRFF	144298304
sp|P02662|CASA1_BOVIN" tr|B5B3R8|B5B3R8_BOVIN"	RPKHPIKHQGLPQEVLN	996.0685++ 664.3814+++ 498.5379++++	2 3 4	996.068507 664.38143 498.537892	RPKHPIKHQGLPQEVLN	17256375312
sp|P02662|CASA1_BOVIN" tr|B5B3R8|B5B3R8_BOVIN"	SKDIGSESTEDQAMED	871.3571++	2	871.357	SKDIGSESTEDQAMED	167705248
sp|P02662|CASA1_BOVIN" tr|B5B3R8|B5B3R8_BOVIN"	EGIHAQQKEPMIGVNQELA	703.3529+++	3	703.353	EGIHAQQKEPM[+16]IGVNQELA	353147040
sp|P02662|CASA1_BOVIN" tr|B5B3R8|B5B3R8_BOVIN"	VPSERYLGYLEQLLR	612.6720+++	3	612.672	VPSERYLGYLEQLLR	49133480
sp|P02662|CASA1_BOVIN" tr|B5B3R8|B5B3R8_BOVIN"	IKHQGLPQEVLNENLLRF	716.7357+++ 537.8036++++	3 4	716.73565 537.803557	IKHQGLPQEVLNENLLRF	103494968
sp|P02662|CASA1_BOVIN" tr|B5B3R8|B5B3R8_BOVIN"	FVAPFPEVFGKEKVNE	918.9802++ 612.9892+++	2 3	918.980169 612.989205	FVAPFPEVFGKEKVNE	531695104
sp|P02662|CASA1_BOVIN" tr|B5B3R8|B5B3R8_BOVIN"	GLPQEVLNENL	613.3248++	2	613.325	GLPQEVLNENL	390030656
sp|P02662|CASA1_BOVIN" tr|B5B3R8|B5B3R8_BOVIN"	GKEKVNELS	502.2746++	2	502.275	GKEKVNELS	124548040
sp|P02662|CASA1_BOVIN" tr|B5B3R8|B5B3R8_BOVIN"	KYKVPQLEIVPNSAEERLHSM	823.4371+++ 617.8296++++	3 4	823.437053 617.829608	KYKVPQLEIVPNSAEERLHSM	1344594784
sp|P02662|CASA1_BOVIN" tr|B5B3R8|B5B3R8_BOVIN"	APFPEVFGKEK	624.8348++ 416.8923+++	2 3	624.834788 416.892284	APFPEVFGKEK	470802112
sp|P02662|CASA1_BOVIN" tr|B5B3R8|B5B3R8_BOVIN"	KYKVPQLEIVPNSAEERL	731.7154+++	3	731.715	KYKVPQLEIVPNS[+80]AEERL	65961360
sp|P02662|CASA1_BOVIN" tr|B5B3R8|B5B3R8_BOVIN"	KHPIKHQGLPQEVLNENLLR	788.4484+++	3	788.448	KHPIKHQGLPQEVLNENLLR	382159328
sp|P02662|CASA1_BOVIN" tr|B5B3R8|B5B3R8_BOVIN"	LKKYKVPQLEIVPNSAEERLH	857.7947+++ 643.5978++++	3 4	857.794668 643.59782	LKKYKVPQLEIVPNS[+80]AEERLH	773680496
sp|P02662|CASA1_BOVIN" tr|B5B3R8|B5B3R8_BOVIN"	SAEERLHSM	538.2455++	2	538.245	SAEERLHSM[+16]	18683944
sp|P02662|CASA1_BOVIN" tr|B5B3R8|B5B3R8_BOVIN"	LPQEVLNENLLR	719.4066++	2	719.407	LPQEVLNENLLR	103112536
sp|P02662|CASA1_BOVIN" tr|B5B3R8|B5B3R8_BOVIN"	SMKEGIHAQQK	628.8244++ 419.5520+++	2 3	628.824429 419.552045	SMKEGIHAQQK	153956780
sp|P02662|CASA1_BOVIN" tr|B5B3R8|B5B3R8_BOVIN"	VPQLEIVPNSAEERLHSMKE	796.0539+++ 597.2923++++	3 4	796.05393 597.292267	VPQLEIVPNS[+80]AEERLHSMKE	113244880
sp|P02662|CASA1_BOVIN" tr|B5B3R8|B5B3R8_BOVIN"	KEGIHAQQKEPM	698.3561++ 465.9065+++	2 3	698.356093 465.906487	KEGIHAQQKEPM	344984856
sp|P02662|CASA1_BOVIN" tr|B5B3R8|B5B3R8_BOVIN"	GKEKVNELSK	566.3220++ 377.8838+++	2 3	566.322045 377.883789	GKEKVNELSK	187507878
sp|P02662|CASA1_BOVIN" tr|B5B3R8|B5B3R8_BOVIN"	SAEERLHSMK	634.2787++	2	634.279	S[+80]AEERLHSMK	105256744
sp|P02662|CASA1_BOVIN" tr|B5B3R8|B5B3R8_BOVIN"	YLEQLLRLK	392.5764+++	3	392.576	YLEQLLRLK	80348536
sp|P02662|CASA1_BOVIN" tr|B5B3R8|B5B3R8_BOVIN"	VPNSAEERLH	576.2938++ 384.5316+++	2 3	576.293819 384.531638	VPNSAEERLH	318503352
sp|P02662|CASA1_BOVIN" tr|B5B3R8|B5B3R8_BOVIN"	HPIKHQGLPQEVL	499.2842+++	3	499.284	HPIKHQGLPQEVL	380493856
sp|P02662|CASA1_BOVIN" tr|B5B3R8|B5B3R8_BOVIN"	VFGKEKVNELSK	459.9294+++	3	459.929	VFGKEKVNELSK	78703496
sp|P02662|CASA1_BOVIN" tr|B5B3R8|B5B3R8_BOVIN"	FVAPFPEVFGKEKVNELSK	749.0483+++	3	749.048	FVAPFPEVFGKEKVNELS[+80]K	56512424
sp|P02662|CASA1_BOVIN" tr|B5B3R8|B5B3R8_BOVIN"	EKVNELSKDIGSESTED	980.4252++	2	980.425	EKVNELSKDIGSES[+80]TED	1197336832
sp|P02662|CASA1_BOVIN" tr|B5B3R8|B5B3R8_BOVIN"	EKVNELSKDIGSESTE	588.9548+++	3	588.955	EKVNELSKDIGSESTE	93049016
sp|P02662|CASA1_BOVIN" tr|B5B3R8|B5B3R8_BOVIN"	SMKEGIHAQQKEPM	538.5973+++	3	538.597	SMKEGIHAQQKEPM	44727744
sp|P02662|CASA1_BOVIN" tr|B5B3R8|B5B3R8_BOVIN"	YQLDAYPSGAWY	717.3222++	2	717.322	YQLDAYPSGAWY	27213164
sp|P02662|CASA1_BOVIN" tr|B5B3R8|B5B3R8_BOVIN"	EKVNELSK	473.7638++	2	473.764	EKVNELSK	101620400
sp|P02662|CASA1_BOVIN" tr|B5B3R8|B5B3R8_BOVIN"	KEGIHAQQKEPMIGVNQELA	746.0512+++	3	746.051	KEGIHAQQKEPM[+16]IGVNQELA	326476736
sp|P02662|CASA1_BOVIN" tr|B5B3R8|B5B3R8_BOVIN"	RPKHPIKHQGLPQE	832.9708++ 555.6496+++ 416.9890++++	2 3 4	832.970805 555.649628 416.98904	RPKHPIKHQGLPQE	16057444576
sp|P02662|CASA1_BOVIN" tr|B5B3R8|B5B3R8_BOVIN"	LSKDIGSESTEDQAMEDIK	704.6598+++	3	704.66	LSKDIGSESTEDQAM[+16]EDIK	132664992
sp|P02662|CASA1_BOVIN" tr|B5B3R8|B5B3R8_BOVIN"	IVPNSAEERLHSM	500.2488+++	3	500.249	IVPNSAEERLHSM[+16]	78264928
sp|P02662|CASA1_BOVIN" tr|B5B3R8|B5B3R8_BOVIN"	SKDIGSESTEDQAM	757.3198++	2	757.32	SKDIGSESTEDQAM[+16]	9132460
sp|P02662|CASA1_BOVIN" tr|B5B3R8|B5B3R8_BOVIN"	SMKEGIHAQQ	564.7769++	2	564.777	SMKEGIHAQQ	40916888
sp|P02662|CASA1_BOVIN" tr|B5B3R8|B5B3R8_BOVIN"	KEGIHAQQKE	389.8754+++	3	389.875	KEGIHAQQKE	55230792
sp|P02662|CASA1_BOVIN" tr|B5B3R8|B5B3R8_BOVIN"	EEIVPNSVEQK	676.3107++	2	676.311	EEIVPNS[+80]VEQK	488893120
sp|P02662|CASA1_BOVIN" tr|B5B3R8|B5B3R8_BOVIN"	VFGKEKVNE	525.2849++ 350.5257+++	2 3	525.284931 350.525713	VFGKEKVNE	95527104
sp|P02662|CASA1_BOVIN" tr|B5B3R8|B5B3R8_BOVIN"	EEIVPNSVEQK	636.3275++	2	636.328	EEIVPNSVEQK	340843904
sp|P02662|CASA1_BOVIN" tr|B5B3R8|B5B3R8_BOVIN"	KVPQLEIVPNSAEERLHSM	731.7159+++ 549.0388++++	3 4	731.715927 549.038764	KVPQLEIVPNSAEERLHSM[+16]	660106912
sp|P02662|CASA1_BOVIN" tr|B5B3R8|B5B3R8_BOVIN"	GKEKVNELSKDIGSESTEDQAMED	885.7361+++	3	885.736	GKEKVNELSKDIGSESTEDQAM[+16]ED	176071456
sp|P02662|CASA1_BOVIN" tr|B5B3R8|B5B3R8_BOVIN"	SAEERLHSMKEGIHAQ	608.3003+++	3	608.3	SAEERLHSMKEGIHAQ	93227616
sp|P02662|CASA1_BOVIN" tr|B5B3R8|B5B3R8_BOVIN"	VAPFPEVFGKEKVN	520.9522+++	3	520.952	VAPFPEVFGKEKVN	139829552
sp|P02662|CASA1_BOVIN" tr|B5B3R8|B5B3R8_BOVIN"	GVNQELAYFYPE	715.3353++	2	715.335	GVNQELAYFYPE	19206002
sp|P02662|CASA1_BOVIN" tr|B5B3R8|B5B3R8_BOVIN"	FFVAPFPEVFGKEK	547.9607+++	3	547.961	FFVAPFPEVFGKEK	139996656
sp|P02662|CASA1_BOVIN" tr|B5B3R8|B5B3R8_BOVIN"	YKVPQLEIVPNSAEERLHSM	786.0704+++ 589.8046++++	3 4	786.07037 589.804596	YKVPQLEIVPNSAEERLHSM[+16]	2982539904
sp|P02662|CASA1_BOVIN" tr|B5B3R8|B5B3R8_BOVIN"	YKVPQLEIVPNSAEER	976.4799++ 651.3223+++	2 3	976.47988 651.322346	YKVPQLEIVPNS[+80]AEER	571848576
sp|P02662|CASA1_BOVIN" tr|B5B3R8|B5B3R8_BOVIN"	NELSKDIGSE	546.2644++	2	546.264	NELSKDIGSE	82642672
sp|P02662|CASA1_BOVIN" tr|B5B3R8|B5B3R8_BOVIN"	KHPIKHQGLPQEVLNENL	1047.5764++ 524.2918++++	2 4	1047.576362 524.291819	KHPIKHQGLPQEVLNENL	1770398760
sp|P02662|CASA1_BOVIN" tr|B5B3R8|B5B3R8_BOVIN"	APFPEVFGK	496.2660++	2	496.266	APFPEVFGK	96681504
sp|P02662|CASA1_BOVIN" tr|B5B3R8|B5B3R8_BOVIN"	KKYKVPQLEIVPNSAEERLHSM	669.8449++++	4	669.845	KKYKVPQLEIVPNS[+80]AEERLHSM	170466608
sp|P02662|CASA1_BOVIN" tr|B5B3R8|B5B3R8_BOVIN"	EKVNELSKDIGS	699.8292++	2	699.829	EKVNELSKDIGS[+80]	158996448
sp|P02662|CASA1_BOVIN" tr|B5B3R8|B5B3R8_BOVIN"	KVPQLEIVPNSAEERLHSM	726.3843+++ 545.0400++++	3 4	726.384289 545.040036	KVPQLEIVPNSAEERLHSM	442798480
sp|P02662|CASA1_BOVIN" tr|B5B3R8|B5B3R8_BOVIN"	KYKVPQLEIVPN	476.6134+++	3	476.613	KYKVPQLEIVPN	303509568
sp|P02662|CASA1_BOVIN" tr|B5B3R8|B5B3R8_BOVIN"	EIVPNSAEERLHSMK	607.2851+++	3	607.285	EIVPNS[+80]AEERLHSMK	439914080
sp|P02662|CASA1_BOVIN" tr|B5B3R8|B5B3R8_BOVIN"	LKKYKVPQLEIVPN	835.0060++ 557.0064+++ 418.0066++++	2 3 4	835.00599 557.006419 418.006633	LKKYKVPQLEIVPN	1263236960
sp|P02662|CASA1_BOVIN" tr|B5B3R8|B5B3R8_BOVIN"	EGIHAQQKEPMIGVNQEL	1011.0097++	2	1011.01	EGIHAQQKEPMIGVNQEL	253886240
sp|P02662|CASA1_BOVIN" tr|B5B3R8|B5B3R8_BOVIN"	KVNELSKDIGSESTEDQAMEDIK	861.4094+++	3	861.409	KVNELSKDIGSESTEDQAM[+16]EDIK	163088736
sp|P02662|CASA1_BOVIN" tr|B5B3R8|B5B3R8_BOVIN"	SKDIGSESTEDQAMEDIK	666.9651+++	3	666.965	SKDIGSESTEDQAM[+16]EDIK	119331872
sp|P02662|CASA1_BOVIN" tr|B5B3R8|B5B3R8_BOVIN"	FFVAPFPEVFGKEKV	580.9835+++	3	580.984	FFVAPFPEVFGKEKV	42680120
sp|P02662|CASA1_BOVIN" tr|B5B3R8|B5B3R8_BOVIN"	SESTEDQAMEDIK	749.8143++	2	749.814	SESTEDQAM[+16]EDIK	74975144
sp|P02662|CASA1_BOVIN" tr|B5B3R8|B5B3R8_BOVIN"	KYKVPQLEIVPNSAEER	1000.5442++ 667.3652+++	2 3	1000.544196 667.365223	KYKVPQLEIVPNSAEER	1375786304
sp|P02662|CASA1_BOVIN" tr|B5B3R8|B5B3R8_BOVIN"	LPQEVLNENL	584.8141++	2	584.814	LPQEVLNENL	76717784
sp|P02662|CASA1_BOVIN" tr|B5B3R8|B5B3R8_BOVIN"	GKEKVNELSKDIGSESTEDQAMED	880.4045+++	3	880.404	GKEKVNELSKDIGSESTEDQAMED	166030944
sp|P02662|CASA1_BOVIN" tr|B5B3R8|B5B3R8_BOVIN"	LRLKKYKVPQL	462.6379+++	3	462.638	LRLKKYKVPQL	202694944
sp|P02662|CASA1_BOVIN" tr|B5B3R8|B5B3R8_BOVIN"	EGIHAQQKEPMIGVNQELAYF	801.3985+++	3	801.398	EGIHAQQKEPMIGVNQELAYF	55809792
sp|P02662|CASA1_BOVIN" tr|B5B3R8|B5B3R8_BOVIN"	RPKHPIKHQGLPQEVLNENLLRF	921.8558+++ 691.6437++++	3 4	921.855821 691.643685	RPKHPIKHQGLPQEVLNENLLRF	9932950272
sp|P02662|CASA1_BOVIN" tr|B5B3R8|B5B3R8_BOVIN"	PMIGVNQEL	508.7577++	2	508.758	PM[+16]IGVNQEL	46309844
sp|P02662|CASA1_BOVIN" tr|B5B3R8|B5B3R8_BOVIN"	DIGSESTEDQAMEDIK	892.3806++	2	892.381	DIGSESTEDQAM[+16]EDIK	196636768
sp|P02662|CASA1_BOVIN" tr|B5B3R8|B5B3R8_BOVIN"	KHQGLPQEVLNENLLR	630.0182+++ 472.7654++++	3 4	630.018158 472.765437	KHQGLPQEVLNENLLR	396585344
sp|P02662|CASA1_BOVIN" tr|B5B3R8|B5B3R8_BOVIN"	LKKYKVPQLEIVPNSAEERLHSM	909.1617+++ 682.1231++++	3 4	909.1617 682.123094	LKKYKVPQLEIVPNSAEERLHSM[+16]	894082064
sp|P02662|CASA1_BOVIN" tr|B5B3R8|B5B3R8_BOVIN"	LKKYKVPQLEIVPNSAEERLH	623.6062++++	4	623.606	LKKYKVPQLEIVPNSAEERLH	125975392
sp|P02662|CASA1_BOVIN" tr|B5B3R8|B5B3R8_BOVIN"	LEIVPNSAEER	668.8109++	2	668.811	LEIVPNS[+80]AEER	112121560
sp|P02662|CASA1_BOVIN" tr|B5B3R8|B5B3R8_BOVIN"	VPNSAEERLHSM	462.5541+++	3	462.554	VPNSAEERLHSM[+16]	47102176
sp|P02662|CASA1_BOVIN" tr|B5B3R8|B5B3R8_BOVIN"	KHPIKHQGLPQEVLNEN	661.0253+++ 496.0208++++	3 4	661.025312 496.020803	KHPIKHQGLPQEVLNEN	1287892352
sp|P02662|CASA1_BOVIN" tr|B5B3R8|B5B3R8_BOVIN"	EKVNELSKDIGSESTEDQAME	807.0121+++	3	807.012	EKVNELSKDIGS[+80]ESTEDQAME	138149408
sp|P02662|CASA1_BOVIN" tr|B5B3R8|B5B3R8_BOVIN"	KYKVPQLEIVPNSAEERLHSM	828.7687+++	3	828.769	KYKVPQLEIVPNSAEERLHSM[+16]	290693792
sp|P02662|CASA1_BOVIN" tr|B5B3R8|B5B3R8_BOVIN"	TEDQAMEDIK	598.2610++	2	598.261	TEDQAM[+16]EDIK	14161416
sp|P02662|CASA1_BOVIN" tr|B5B3R8|B5B3R8_BOVIN"	DVPSERYLGYLE	720.8539++	2	720.854	DVPSERYLGYLE	140974224
sp|P02662|CASA1_BOVIN" tr|B5B3R8|B5B3R8_BOVIN"	VNELSKDIGSESTEDQAMED	1098.9761++ 732.9865+++	2 3	1098.976077 732.986477	VNELSKDIGSESTEDQAMED	229514288
sp|P02662|CASA1_BOVIN" tr|B5B3R8|B5B3R8_BOVIN"	FFVAPFPEVFGKEKVNE	662.0120+++	3	662.012	FFVAPFPEVFGKEKVNE	58386340
sp|P02662|CASA1_BOVIN" tr|B5B3R8|B5B3R8_BOVIN"	KEGIHAQQKEPMIG	527.9400+++	3	527.94	KEGIHAQQKEPM[+16]IG	51695984
sp|P02662|CASA1_BOVIN" tr|B5B3R8|B5B3R8_BOVIN"	HPIKHQGLPQEVLNENLLR	745.7501+++	3	745.75	HPIKHQGLPQEVLNENLLR	150796608
sp|P02662|CASA1_BOVIN" tr|B5B3R8|B5B3R8_BOVIN"	ENLLRFF	469.7584++	2	469.758	ENLLRFF	57477636
sp|P02662|CASA1_BOVIN" tr|B5B3R8|B5B3R8_BOVIN"	EKVNELSKDIGSESTEDQAMEDIKQMEAESISSSEEIVPNSVEQK	1250.0867++++	4	1250.09	EKVNELSKDIGSESTEDQAMEDIKQMEAESISSSEEIVPNSVEQK	30477778
sp|P02662|CASA1_BOVIN" tr|B5B3R8|B5B3R8_BOVIN"	EIVPNSAEERLHSM	537.9314+++	3	537.931	EIVPNSAEERLHSM	127276624
sp|P02662|CASA1_BOVIN" tr|B5B3R8|B5B3R8_BOVIN"	KEGIHAQQKEPMIGVN	598.9771+++	3	598.977	KEGIHAQQKEPM[+16]IGVN	17824498
sp|P02662|CASA1_BOVIN" tr|B5B3R8|B5B3R8_BOVIN"	VPQLEIVPNSAEERLHS	640.0058+++	3	640.006	VPQLEIVPNSAEERLHS	232979504
sp|P02662|CASA1_BOVIN" tr|B5B3R8|B5B3R8_BOVIN"	VNELSKDIGSE	595.7986++	2	595.799	VNELSKDIGSE	101813872
sp|P02662|CASA1_BOVIN" tr|B5B3R8|B5B3R8_BOVIN"	STEDQAMEDIK	641.7770++	2	641.777	STEDQAM[+16]EDIK	18853176
sp|P02662|CASA1_BOVIN" tr|B5B3R8|B5B3R8_BOVIN"	VLNENLLRF	559.3218++	2	559.322	VLNENLLRF	193803104
sp|P02662|CASA1_BOVIN" tr|B5B3R8|B5B3R8_BOVIN"	KEGIHAQQKEPMIGV	555.6311+++	3	555.631	KEGIHAQQKEPMIGV	321235840
sp|P02662|CASA1_BOVIN" tr|B5B3R8|B5B3R8_BOVIN"	LGYLEQLLR	552.8242++	2	552.824	LGYLEQLLR	18653094
sp|P02662|CASA1_BOVIN" tr|B5B3R8|B5B3R8_BOVIN"	FGKEKVNE	475.7507++	2	475.751	FGKEKVNE	23477436
sp|P02662|CASA1_BOVIN" tr|B5B3R8|B5B3R8_BOVIN"	LHSMKEGIHAQ	422.8802+++	3	422.88	LHSM[+16]KEGIHAQ	42777620
sp|P02662|CASA1_BOVIN" tr|B5B3R8|B5B3R8_BOVIN"	KVPQLEIVPNSAEERLH	680.3489+++	3	680.349	KVPQLEIVPNS[+80]AEERLH	150499184
sp|P02662|CASA1_BOVIN" tr|B5B3R8|B5B3R8_BOVIN"	GKEKVNEL	458.7585++	2	458.759	GKEKVNEL	95357032
sp|P02662|CASA1_BOVIN" tr|B5B3R8|B5B3R8_BOVIN"	VPQLEIVPNSAEERLH	915.9891++	2	915.989	VPQLEIVPNSAEERLH	46613204
sp|P02662|CASA1_BOVIN" tr|B5B3R8|B5B3R8_BOVIN"	KVNELSKDIGSESTEDQAMED	775.6848+++	3	775.685	KVNELSKDIGSESTEDQAMED	47993756
sp|P02662|CASA1_BOVIN" tr|B5B3R8|B5B3R8_BOVIN"	GLPQEVLNENLLR	747.9174++ 498.9473+++	2 3	747.917372 498.94734	GLPQEVLNENLLR	779581356
sp|P02662|CASA1_BOVIN" tr|B5B3R8|B5B3R8_BOVIN"	VNELSKDIGSESTEDQAMEDIKQMEAESISSSEEIVPNSVEQK	1189.8010++++	4	1189.8	VNELSKDIGSESTEDQAM[+16]EDIKQMEAESISSSEEIVPNSVEQK	40632616
sp|P02662|CASA1_BOVIN" tr|B5B3R8|B5B3R8_BOVIN"	VFGKEKVNEL	581.8270++	2	581.827	VFGKEKVNEL	138410768
sp|P02662|CASA1_BOVIN" tr|B5B3R8|B5B3R8_BOVIN"	GKEKVNELSKDIGSESTED	689.0026+++	3	689.003	GKEKVNELSKDIGSESTED	579950592
sp|P02662|CASA1_BOVIN" tr|B5B3R8|B5B3R8_BOVIN"	EKVNELSKDIGSESTEDQAMED	1267.5280++	2	1267.53	EKVNELSKDIGSES[+80]TEDQAMED	45866316
sp|P02662|CASA1_BOVIN" tr|B5B3R8|B5B3R8_BOVIN"	EKVNELSKDIGSESTEDQAMEDIKQMEAESISSSEEIVPNSVEQK	1254.0854++++	4	1254.09	EKVNELSKDIGSESTEDQAM[+16]EDIKQMEAESISSSEEIVPNSVEQK	11185766
sp|P02662|CASA1_BOVIN" tr|B5B3R8|B5B3R8_BOVIN"	LEIVPNSAEERLHS	531.9459+++	3	531.946	LEIVPNSAEERLHS	43402056
sp|P02662|CASA1_BOVIN" tr|B5B3R8|B5B3R8_BOVIN"	EVLNENLLR	550.3089++	2	550.309	EVLNENLLR	28128000
sp|P02662|CASA1_BOVIN" tr|B5B3R8|B5B3R8_BOVIN"	EKVNELSKDIGSESTEDQAMEDIK	694.5624++++	4	694.562	EKVNELSKDIGS[+80]ESTEDQAMEDIK	41756288
sp|P02662|CASA1_BOVIN" tr|B5B3R8|B5B3R8_BOVIN"	HPIKHQGLPQE	642.3464++ 428.5667+++	2 3	642.346386 428.566682	HPIKHQGLPQE	258480590
sp|P02662|CASA1_BOVIN" tr|B5B3R8|B5B3R8_BOVIN"	EKVNELSKDIGSESTEDQAMEDIKQM	1038.7692+++	3	1038.77	EKVNELSKDIGS[+80]ES[+80]TEDQAMEDIKQM	18320460
sp|P02662|CASA1_BOVIN" tr|B5B3R8|B5B3R8_BOVIN"	RPKHPIKHQG	399.9036+++	3	399.904	RPKHPIKHQG	8679506
sp|P02662|CASA1_BOVIN" tr|B5B3R8|B5B3R8_BOVIN"	AYFYPELFR	603.3031++	2	603.303	AYFYPELFR	39453848
sp|P02662|CASA1_BOVIN" tr|B5B3R8|B5B3R8_BOVIN"	GKEKVNELSKDIGSESTEDQAMEDIK	720.8499++++	4	720.85	GKEKVNELSKDIGSESTEDQAMEDIK	152480480
sp|P02662|CASA1_BOVIN" tr|B5B3R8|B5B3R8_BOVIN"	RPKHPIKHQGL	437.5983+++	3	437.598	RPKHPIKHQGL	11634996
sp|P02662|CASA1_BOVIN" tr|B5B3R8|B5B3R8_BOVIN"	LNENLLR	436.2534++	2	436.253	LNENLLR	134663024
sp|P02663|CASA2_BOVIN"	NAVPITPTLNREQLSTSEENSK	1254.6025++ 1254.6025++	2 2	1254.602515 1254.602515	NAVPITPTLNREQLSTS[+80]EENSK NAVPITPTLNREQLS[+80]TSEENSK	2007852544
sp|P02663|CASA2_BOVIN"	STEVFTKK	510.2441++	2	510.244	S[+80]TEVFTKK	385279008
sp|P02663|CASA2_BOVIN"	KHYQKALNEINQF	544.9546+++	3	544.955	KHYQKALNEINQF	740053056
sp|P02663|CASA2_BOVIN"	YQKFPQYLQY	689.3455++	2	689.346	YQKFPQYLQY	11240396800
sp|P02663|CASA2_BOVIN"	KNTMEHVSSSEESIISQETYK	863.0272+++ 863.0272+++	3 3	863.027208 863.027208	KNTMEHVSS[+80]S[+80]EESIISQETYK KNTMEHVS[+80]S[+80]SEESIISQETYK	4512687104
sp|P02663|CASA2_BOVIN"	LNREQLSTSEENSKKT	466.7406++++	4	466.741	LNREQLSTSEENSKKT	49882612
sp|P02663|CASA2_BOVIN"	LNREQLSTSEENSKKTVDMESTEVFT	751.3619++++	4	751.362	LNREQLSTSEENSKKTVDMESTEVFT	234332000
sp|P02663|CASA2_BOVIN"	TKKTKLTEEEKNRL	430.2506++++	4	430.251	TKKTKLTEEEKNRL	108899696
sp|P02663|CASA2_BOVIN"	KNTMEHVSSSEESIISQETYKQEK	743.8213++++ 743.8213++++	4 4	743.821259 743.821259	KNTMEHVSS[+80]SEESIIS[+80]QETYKQEK KNTMEHVSS[+80]S[+80]EESIISQETYKQEK	8727379968
sp|P02663|CASA2_BOVIN"	NAVPITPTLNREQLSTSEENSKKTVDMESTEVFTK	1001.7356++++	4	1001.74	NAVPITPTLNREQLS[+80]TSEENSKKTVDMESTEVFTK	12423501824
sp|P02663|CASA2_BOVIN"	TKLTEEEKNRLNFLK	932.0204++ 466.5138++++	2 4	932.020357 466.513817	TKLTEEEKNRLNFLK	7965235968
sp|P02663|CASA2_BOVIN"	NAVPITPTLNREQLSTSEENSKKTVDMESTEVFTK	1361.9672+++ 1361.9672+++ 1021.7272++++	3 3 4	1361.967161 1361.967161 1021.72719	NAVPITPT[+80]LNREQLS[+80]TSEENSKKTVDMESTEVFTK NAVPIT[+80]PTLNREQLS[+80]TSEENSKKTVDMESTEVFTK	7577467648
sp|P02663|CASA2_BOVIN"	KNTMEHVSSSEESIISQETYK	836.3718+++	3	836.372	KNT[+80]MEHVSSSEESIISQETYK	6207845376
sp|P02663|CASA2_BOVIN"	RNAVPITPTLNREQLSTSEENSKKTVD	757.6481++++	4	757.648	RNAVPITPTLNREQLSTSEENSKKTVD	113772096
sp|P02663|CASA2_BOVIN"	KNTMEHVSSSEESIISQETYKQEK	964.7705+++ 723.8297++++ 723.8297++++	3 4 4	964.770476 723.829676 723.829676	KNT[+80]MEHVSSSEESIISQETYKQEK KNTMEHVSS[+80]SEESIISQETYKQEK	30123502080
sp|P02663|CASA2_BOVIN"	NAVPITPTLNREQLSTSEENSKKTVDMESTEVFTK	1335.3117+++ 1001.7356++++	3 4	1335.311717 1001.735607	NAVPITPT[+80]LNREQLSTSEENSKKTVDMESTEVFTK	14800938496
sp|P02663|CASA2_BOVIN"	KNTMEHVSSSEESIISQETYK	1214.0708++ 809.7163+++ 607.5391++++	2 3 4	1214.070843 809.716321 607.53906	KNTMEHVSSSEESIISQETYK	10572719104
sp|P02663|CASA2_BOVIN"	KTKLTEEEKNRLNFL	932.0204++ 621.6827+++ 466.5138++++	2 3 4	932.020357 621.682663 466.513817	KTKLTEEEKNRLNFL	24249805056
sp|P02663|CASA2_BOVIN"	FALPQYLKT	540.8080++	2	540.808	FALPQYLKT	589857216
sp|P02663|CASA2_BOVIN"	MESTEVFTKK	608.2999++ 405.8690+++	2 3	608.299921 405.869039	M[+16]ESTEVFTKK	2451732416
sp|P02663|CASA2_BOVIN"	TKLTEEEKNRLNFL	867.9729++ 578.9843+++ 434.4901++++	2 3 4	867.972876 578.984342 434.490076	TKLTEEEKNRLNFL	25125623040
sp|P02663|CASA2_BOVIN"	LYQGPIVLNPWDQVK	885.4829++ 590.6577+++	2 3	885.482879 590.657678	LYQGPIVLNPWDQVK	936745920
sp|P02663|CASA2_BOVIN"	LYQGPIVLNPWDQVKR	963.5334++ 642.6914+++	2 3	963.533435 642.691382	LYQGPIVLNPWDQVKR	5072757632
sp|P02663|CASA2_BOVIN"	NREQLSTSEENSKKTVD	682.3109+++	3	682.311	NREQLSTS[+80]EENSKKTVD	364637472
sp|P02663|CASA2_BOVIN"	LNREQLSTSEENSKKTVD	746.6611+++	3	746.661	LNREQLS[+80]T[+80]SEENSKKTVD	2257591040
sp|P02663|CASA2_BOVIN"	TKLTEEEKNRL	680.8752++ 454.2525+++	2 3	680.875173 454.252541	TKLTEEEKNRL	2219105056
sp|P02663|CASA2_BOVIN"	TEEEKNRLNFL	696.8595++ 464.9088+++	2 3	696.859523 464.908774	TEEEKNRLNFL	2193857280
sp|P02663|CASA2_BOVIN"	TKLTEEEKNRLNF	541.2897+++ 406.2191++++	3 4	541.289654 406.21906	TKLTEEEKNRLNF	9152620672
sp|P02663|CASA2_BOVIN"	MESTEVFTKKTK	754.8569++	2	754.857	MES[+80]TEVFTKKTK	375351488
sp|P02663|CASA2_BOVIN"	KTKLTEEEKNRL	496.9509+++ 372.9650++++	3 4	496.950862 372.964965	KTKLTEEEKNRL	2004659840
sp|P02663|CASA2_BOVIN"	KTVDMESTEVFTKK	553.6150+++	3	553.615	KTVDM[+16]ESTEVFTKK	174964928
sp|P02663|CASA2_BOVIN"	NAVPITPTLNR	598.3433++	2	598.343	NAVPITPTLNR	997915456
sp|P02663|CASA2_BOVIN"	MESTEVFTKK	600.3025++ 400.5374+++	2 3	600.302464 400.537401	MESTEVFTKK	5514138880
sp|P02663|CASA2_BOVIN"	KNTMEHVSSSEESIISQETYK	1294.0372++ 1294.0372++ 863.0272+++	2 2 3	1294.037174 1294.037174 863.027208	KNTMEHVSSS[+80]EESIIS[+80]QETYK KNTMEHVSS[+80]SEESIIS[+80]QETYK	3035217728
sp|P02663|CASA2_BOVIN"	KTKLTEEEKNRLNFLK	664.3810+++ 498.5376++++	3 4	664.380984 498.537557	KTKLTEEEKNRLNFLK	6254814976
sp|P02663|CASA2_BOVIN"	ITVDDKHYQ	559.7775++ 373.5207+++	2 3	559.77747 373.520739	ITVDDKHYQ	265180560
sp|P02663|CASA2_BOVIN"	KNTMEHVSSSEESIISQETYKQE	922.0722+++	3	922.072	KNTMEHVSSS[+80]EESIISQETYKQE	1793652096
sp|P02663|CASA2_BOVIN"	KNTMEHVSSSEESIISQETYKQE	922.0722+++	3	922.072	KNT[+80]MEHVSSSEESIISQETYKQE	1793652096
sp|P02663|CASA2_BOVIN"	MESTEVFTK	544.2524++	2	544.252	M[+16]ESTEVFTK	2784328960
sp|P02663|CASA2_BOVIN"	KNTMEHVSSSEESIISQETYKQEK	1406.6689++ 938.1150+++ 703.8381++++	2 3 4	1406.66891 938.115032 703.838093	KNTMEHVSSSEESIISQETYKQEK	34266172608
sp|P02663|CASA2_BOVIN"	DKHYQKALNEINQF	583.2969+++	3	583.297	DKHYQKALNEINQF	1368102144
sp|P02663|CASA2_BOVIN"	NAVPITPTLNREQL	783.4359++	2	783.436	NAVPITPTLNREQL	3004428544
sp|P02663|CASA2_BOVIN"	IISQETYK	531.2494++	2	531.249	IIS[+80]QETYK	258466544
sp|P02663|CASA2_BOVIN"	LNREQLSTSEENSKKTVD	720.0056+++	3	720.006	LNREQLS[+80]TSEENSKKTVD	2321404160
sp|P02663|CASA2_BOVIN"	KTKLTEEEKNRLN	801.9441++ 534.9652+++ 401.4757++++	2 3 4	801.944118 534.965171 401.475697	KTKLTEEEKNRLN	5673510304
sp|P02663|CASA2_BOVIN"	NAVPITPTLNREQLSTSEENSKKTVDMESTEVFTK	1388.6226+++	3	1388.62	NAVPIT[+80]PT[+80]LNREQLSTSEENSKKTVDMES[+80]TEVFTK	1517327360
sp|P02663|CASA2_BOVIN"	RYQKFALPQY	657.3537++ 438.5715+++	2 3	657.353679 438.571545	RYQKFALPQY	7028555264
sp|P02663|CASA2_BOVIN"	KNTMEHVSSSEESIISQETYKQEK	991.4259+++ 991.4259+++ 991.4259+++ 743.8213++++	3 3 3 4	991.425919 991.425919 991.425919 743.821259	KNTMEHVS[+80]SSEESIIS[+80]QETYKQEK KNTMEHVS[+80]SSEES[+80]IISQETYKQEK KNTMEHVS[+80]S[+80]SEESIISQETYKQEK	16798500608
sp|P02663|CASA2_BOVIN"	KNTMEHVSSSEE	689.3012++ 459.8699+++	2 3	689.30118 459.869879	KNTMEHVSSSEE	351170368
sp|P02663|CASA2_BOVIN"	MESTEVFTKKTK	714.8738++ 476.9183+++ 357.9405++++	2 3 4	714.873784 476.918282 357.94053	MESTEVFTKKTK	2022010208
sp|P02663|CASA2_BOVIN"	FALPQYLKTVY	671.8739++	2	671.874	FALPQYLKTVY	54693400
sp|P02663|CASA2_BOVIN"	KNTMEHVSSSEESIISQETYKQEK	964.7705+++	3	964.77	KNTMEHVS[+80]SSEESIISQETYKQEK	6714593792
sp|P02663|CASA2_BOVIN"	ALNEINQFYQKFPQYLQY	769.7197+++	3	769.72	ALNEINQFYQKFPQYLQY	724076160
sp|P02663|CASA2_BOVIN"	TKLTEEEKNRLN	737.8966++ 492.2668+++ 369.4520++++	2 3 4	737.896637 492.26685 369.451956	TKLTEEEKNRLN	6957450144
sp|P02663|CASA2_BOVIN"	YQGPIVLNPWDQVK	828.9408++	2	828.941	YQGPIVLNPWDQVK	252277120
sp|P02663|CASA2_BOVIN"	LNREQLSTSEENSKKTVDMESTEVFTK	803.3773++++	4	803.377	LNREQLST[+80]SEENSKKTVDMESTEVFTK	1119945728
sp|P02663|CASA2_BOVIN"	LKTVYQHQK	572.8273++ 382.2206+++	2 3	572.827297 382.220624	LKTVYQHQK	712155240
sp|P02663|CASA2_BOVIN"	TKVIPYVRYL	626.3766++ 417.9202+++	2 3	626.376623 417.920174	TKVIPYVRYL	5141701632
sp|P02663|CASA2_BOVIN"	KNTMEHVSSSEESIISQETY	1190.0065++ 793.6734+++ 1190.0065++	2 3 2	1190.006527 793.673444 1190.006527	KNTMEHVSSSEESIIS[+80]QETY KNTMEHVS[+80]SSEESIISQETY	964849696
sp|P02663|CASA2_BOVIN"	LYQGPIVLNPWDQV	821.4354++	2	821.435	LYQGPIVLNPWDQV	189582672
sp|P02663|CASA2_BOVIN"	MESTEVFTK	536.2550++	2	536.255	MESTEVFTK	4446843392
sp|P02663|CASA2_BOVIN"	KNTMEHVSSSEESIISQETYKQEKN	732.3488++++	4	732.349	KNTMEHVSSSEESIISQETYKQEKN	117087072
sp|P02663|CASA2_BOVIN"	MESTEVFTKK	640.2856++ 427.1928+++	2 3	640.285629 427.192845	MES[+80]TEVFTKK	7799798528
sp|P02663|CASA2_BOVIN"	EEVKITVDDKHYQ	535.2703+++	3	535.27	EEVKITVDDKHYQ	172072736
sp|P02663|CASA2_BOVIN"	NAVPITPTLNREQ	726.8939++	2	726.894	NAVPITPTLNREQ	644585024
sp|P02663|CASA2_BOVIN"	SKKTVDMESTEVFTKK	646.6478+++	3	646.648	SKKTVDMES[+80]TEVFTKK	315115840
sp|P02663|CASA2_BOVIN"	NREQLSTSEENSK	534.5649+++	3	534.565	NREQLST[+80]SEENSK	14924996
sp|P02663|CASA2_BOVIN"	LNREQLSTSEENSKK	614.9580+++	3	614.958	LNREQLST[+80]SEENSKK	179093264
sp|P02663|CASA2_BOVIN"	RYQKFALPQYL	713.8957++ 476.2662+++	2 3	713.895711 476.266233	RYQKFALPQYL	762714752
sp|P02663|CASA2_BOVIN"	KNTMEHVSSSEESIISQETYKQE	1342.6214++ 895.4167+++ 671.8144++++	2 3 4	1342.621429 895.416711 671.814352	KNTMEHVSSSEESIISQETYKQE	7899663200
sp|P02663|CASA2_BOVIN"	TKLTEEEKNRLNFLKK	498.5376++++	4	498.538	TKLTEEEKNRLNFLKK	1106774144
sp|P02663|CASA2_BOVIN"	LNREQLSTSEENSKKTV	681.6633+++	3	681.663	LNREQLST[+80]SEENSKKTV	106533200
sp|P02663|CASA2_BOVIN"	TKVIPYVRY	380.2255+++	3	380.225	TKVIPYVRY	834737792
sp|P02663|CASA2_BOVIN"	KNTMEHVSSSEESIISQETYK	1334.0203++ 889.6827+++ 1334.0203++ 889.6827+++ 1334.0203++ 889.6827+++	2 3 2 3 2 3	1334.02034 889.682652 1334.02034 889.682652 1334.02034 889.682652	KNTMEHVSS[+80]S[+80]EESIIS[+80]QETYK KNTMEHVS[+80]S[+80]SEESIIS[+80]QETYK KNTMEHVS[+80]S[+80]SEES[+80]IISQETYK	16788016128
sp|P02663|CASA2_BOVIN"	FLKKISQRY	591.8533++ 394.9046+++	2 3	591.853315 394.904635	FLKKISQRY	634651648
sp|P02663|CASA2_BOVIN"	KNTMEHVSSSEESIISQETYK	1254.0540++ 836.3718+++ 1254.0540++	2 3 2	1254.054009 836.371765 1254.054009	KNTMEHVSSSEESIIS[+80]QETYK KNTMEHVSSS[+80]EESIISQETYK	7185897952
sp|P02663|CASA2_BOVIN"	LNREQLSTSEENSKKTVDMESTEVFTKKT	860.6629++++	4	860.663	LNREQLSTSEENS[+80]KKTVDMESTEVFTKKT	141922880
sp|P02663|CASA2_BOVIN"	SIISQETYKQEK	727.3803++ 485.2560+++	2 3	727.380288 485.255951	SIISQETYKQEK	532611856
sp|P02663|CASA2_BOVIN"	TKKTKLTEEEKNRLNF	660.3689+++ 495.5285++++	3 4	660.368856 495.528461	TKKTKLTEEEKNRLNF	1466608160
sp|P02663|CASA2_BOVIN"	ALNEINQFY	556.2746++	2	556.275	ALNEINQFY	828440448
sp|P02663|CASA2_BOVIN"	KNTMEHVSSSEESIISQETYK	836.3718+++ 627.5306++++	3 4	836.371765 627.530642	KNTMEHVSS[+80]SEESIISQETYK	6343999984
sp|P02663|CASA2_BOVIN"	KNTMEHVSSSEESIISQETY	1150.0234++ 767.0180+++	2 3	1150.023362 767.018	KNTMEHVSSSEESIISQETY	1919331072
sp|P02663|CASA2_BOVIN"	KNTMEHVSSSEESIISQ	641.2984+++	3	641.298	KNTM[+16]EHVSSSEESIISQ	156484256
sp|P02663|CASA2_BOVIN"	KTKLTEEEKNRLNF	875.4783++ 583.9880+++ 438.2428++++	2 3 4	875.478325 583.987975 438.242801	KTKLTEEEKNRLNF	13798031744
sp|P02663|CASA2_BOVIN"	NAVPITPTLNREQLS	826.9519++	2	826.952	NAVPITPTLNREQLS	182970368
sp|P02663|CASA2_BOVIN"	VSSSEESIISQETYKQEK	691.3392+++	3	691.339	VSSSEESIISQETYKQEK	195088384
sp|P02663|CASA2_BOVIN"	RNAVPITPTLNREQLSTSEENSKKTVDME	842.6604++++	4	842.66	RNAVPITPTLNREQLST[+80]SEENSKKTVDME	166914176
sp|P02663|CASA2_BOVIN"	TVDMESTEVFTKK	510.9167+++	3	510.917	TVDM[+16]ESTEVFTKK	704339712
sp|P02663|CASA2_BOVIN"	KLTEEEKNRLNFL	817.4490++	2	817.449	KLTEEEKNRLNFL	275948928
sp|P02663|CASA2_BOVIN"	EEVKITVDDKHYQK	577.9686+++ 433.7283++++	3 4	577.968581 433.728255	EEVKITVDDKHYQK	324746608
sp|P02663|CASA2_BOVIN"	IISQETYKQEK	723.8474++	2	723.847	IIS[+80]QETYKQEK	408952288
sp|P02663|CASA2_BOVIN"	KNTMEHVSSSEESIISQETYKQEK	1414.6664++ 943.4467+++ 707.8368++++	2 3 4	1414.666368 943.44667 707.836822	KNTM[+16]EHVSSSEESIISQETYKQEK	28938533288
sp|P02663|CASA2_BOVIN"	NAVPITPTLNREQLSTSEENSK	1214.6193++	2	1214.62	NAVPITPTLNREQLSTSEENSK	486550208
sp|P02663|CASA2_BOVIN"	TKKTKLTEEEK	445.5890+++	3	445.589	TKKTKLTEEEK	78250752
sp|P02663|CASA2_BOVIN"	HVSSSEESIISQETYKQEK	737.0255+++	3	737.025	HVSSSEESIISQETYKQEK	439493024
sp|P02663|CASA2_BOVIN"	KNTMEHVSSSEES	732.8172++	2	732.817	KNTMEHVSSSEES	111046800
sp|P02663|CASA2_BOVIN"	ESIISQETYKQEK	831.8848++	2	831.885	ESIIS[+80]QETYKQEK	314721824
sp|P02663|CASA2_BOVIN"	STEVFTKKTK	390.2239+++	3	390.224	STEVFTKKTK	71372952
sp|P02663|CASA2_BOVIN"	KNTMEHVSSSEESIISQETY	793.6734+++	3	793.673	KNTMEHVSS[+80]SEESIISQETY	610777216
sp|P02663|CASA2_BOVIN"	LNREQLSTSEENSKKTVDMESTEVFTK	783.3857++++	4	783.386	LNREQLSTSEENSKKTVDMESTEVFTK	441512512
sp|P02663|CASA2_BOVIN"	TVDMESTEVFTKKT	539.2676+++	3	539.268	TVDMESTEVFTKKT	103293344
sp|P02663|CASA2_BOVIN"	LNREQLSTSEENSKKTVD	693.3502+++ 520.2645++++	3 4	693.35019 520.264461	LNREQLSTSEENSKKTVD	511694288
sp|P02663|CASA2_BOVIN"	KLTEEEKNRLN	687.3728++ 458.5843+++	2 3	687.372797 458.58429	KLTEEEKNRLN	509882716
sp|P02663|CASA2_BOVIN"	MEHVSSSEESIISQETYKQE	781.0215+++	3	781.022	MEHVSSSEESIISQETYKQE	4594993152
sp|P02663|CASA2_BOVIN"	KNTMEHVSSSEESIISQETY	1158.0208++ 772.3496+++	2 3	1158.020819 772.349638	KNTM[+16]EHVSSSEESIISQETY	1929940256
sp|P02663|CASA2_BOVIN"	AMKPWIQPKTKVIPY	606.0112+++	3	606.011	AM[+16]KPWIQPKTKVIPY	177083888
sp|P02663|CASA2_BOVIN"	KNTMEHVSSSEESIISQETYK	1222.0683++ 815.0480+++ 611.5378++++	2 3 4	1222.068301 815.047959 611.537788	KNTM[+16]EHVSSSEESIISQETYK	5524820256
sp|P02663|CASA2_BOVIN"	EEEKNRLNFL	646.3357++	2	646.336	EEEKNRLNFL	502290720
sp|P02663|CASA2_BOVIN"	LYQGPIVLNPWD	707.8719++	2	707.872	LYQGPIVLNPWD	471402208
sp|P02663|CASA2_BOVIN"	TKKTKLTEEEKN	483.6034+++	3	483.603	TKKTKLTEEEKN	12066440
sp|P02663|CASA2_BOVIN"	KNTMEHVSSSEESIISQE	732.2919+++	3	732.292	KNTMEHVSS[+80]SEESIIS[+80]QE	190980144
sp|P02663|CASA2_BOVIN"	NREQLSTSEENSKKTVD	655.6555+++ 491.9934++++	3 4	655.655502 491.993445	NREQLSTSEENSKKTVD	27191656
sp|P02663|CASA2_BOVIN"	SKKTVDMESTEVFTK	577.2941+++	3	577.294	SKKTVDMESTEVFTK	317394400
sp|P02663|CASA2_BOVIN"	LNREQLSTSEENSKKTVDMESTEVFTKKTK	892.6867++++	4	892.687	LNREQLSTSEENSKKT[+80]VDMESTEVFTKKTK	134295184
sp|P02663|CASA2_BOVIN"	KNTMEHVSSSEESIISQETYKQEK	1446.6521++ 964.7705+++ 723.8297++++ 1446.6521++	2 3 4 2	1446.652076 964.770476 723.829676 1446.652076	KNTMEHVSSSEESIIS[+80]QETYKQEK KNTMEHVSSS[+80]EESIISQETYKQEK	18768511616
sp|P02663|CASA2_BOVIN"	MEHVSSSEESIISQETYKQEK	850.3753+++ 850.3753+++	3 3	850.375286 850.375286	MEHVSSSEESIIS[+80]QETYKQEK MEHVSS[+80]SEESIISQETYKQEK	485381184
sp|P02663|CASA2_BOVIN"	KTVDMESTEVFTKKTKLTEEEKNRLN	1060.1949+++ 795.3980++++	3 4	1060.194896 795.397991	KTVDMES[+80]TEVFTKKTKLTEEEKNRLN	613982776
sp|P02663|CASA2_BOVIN"	IISQETYKQE	619.8168++	2	619.817	IISQETYKQE	44518260
sp|P02663|CASA2_BOVIN"	KNTMEHVSSSEESIISQE	1057.9510++ 705.6364+++	2 3	1057.951024 705.636441	KNTMEHVSSSEESIIS[+80]QE	739020512
sp|P02663|CASA2_BOVIN"	NAVPITPTLNREQLSTSEENSK	1294.5857++	2	1294.59	NAVPITPTLNREQLS[+80]T[+80]SEENSK	182365760
sp|P02663|CASA2_BOVIN"	NREQLSTSEENSKKT	584.2904+++ 438.4696++++	3 4	584.290383 438.469606	NREQLSTSEENSKKT	148106908
sp|P02663|CASA2_BOVIN"	AMKPWIQPK	366.8758+++	3	366.876	AMKPWIQPK	50822368
sp|P02663|CASA2_BOVIN"	FLKKISQRYQ	437.5908+++	3	437.591	FLKKISQRYQ	127551440
sp|P02663|CASA2_BOVIN"	KNTMEHVSSSEESIISQETYK	889.6827+++	3	889.683	KNTMEHVS[+80]S[+80]S[+80]EESIISQETYK	2900882688
sp|P02663|CASA2_BOVIN"	VKITVDDKHYQ	449.2419+++	3	449.242	VKITVDDKHYQ	768006400
sp|P02663|CASA2_BOVIN"	LTEEEKNRLNFLK	817.4490++	2	817.449	LTEEEKNRLNFLK	148309984
sp|P02663|CASA2_BOVIN"	NAVPITPTLNREQLSTSEENSKKTVD	1516.2047++	2	1516.2	NAVPIT[+80]PT[+80]LNREQLSTSEENSKKTVD	475218624
sp|P02663|CASA2_BOVIN"	EVKITVDDKHYQ	737.8805++ 492.2561+++ 369.4439++++	2 3 4	737.880455 492.256062 369.443866	EVKITVDDKHYQ	640477568
sp|P02663|CASA2_BOVIN"	SIISQETYKQEK	767.3635++ 511.9114+++	2 3	767.363454 511.911394	SIIS[+80]QETYKQEK	1329749664
sp|P02663|CASA2_BOVIN"	KTVDMESTEVFTKK	548.2834+++	3	548.283	KTVDMESTEVFTKK	411516704
sp|P02663|CASA2_BOVIN"	LKTVYQHQ	508.7798++	2	508.78	LKTVYQHQ	350651200
sp|P02663|CASA2_BOVIN"	LYQGPIVLNPWDQ	771.9012++	2	771.901	LYQGPIVLNPWDQ	32915366
sp|P02663|CASA2_BOVIN"	LTEEEKNRLN	623.3253++	2	623.325	LTEEEKNRLN	163926016
sp|P02663|CASA2_BOVIN"	ESTEVFTK	470.7347++	2	470.735	ESTEVFTK	151152576
sp|P02663|CASA2_BOVIN"	TKLTEEEKNRLNFLKKISQ	773.7725+++	3	773.773	TKLTEEEKNRLNFLKKISQ	1022500864
sp|P02663|CASA2_BOVIN"	KKISQRYQKFALPQY	633.3597+++	3	633.36	KKISQRYQKFALPQY	564299584
sp|P02663|CASA2_BOVIN"	SKKTVDMESTEVFTKKTK	723.0287+++ 542.5234++++	3 4	723.028722 542.52336	SKKTVDMES[+80]TEVFTKKTK	145076752
sp|P02663|CASA2_BOVIN"	MEHVSSSEESIISQETYKQEK	823.7198+++	3	823.72	MEHVSSSEESIISQETYKQEK	407075264
sp|P02663|CASA2_BOVIN"	TKLTEEEKNR	624.3331++ 416.5579+++	2 3	624.333141 416.557853	TKLTEEEKNR	875175936
sp|P02663|CASA2_BOVIN"	KNTMEHVSSSEESIISQETYKQE	948.7276+++ 948.7276+++	3 3	948.727598 948.727598	KNTMEHVSS[+80]SEESIIS[+80]QETYKQE KNTMEHVSS[+80]S[+80]EESIISQETYKQE	956319744
sp|P02663|CASA2_BOVIN"	MEHVSSSEESIISQETYK	695.3211+++	3	695.321	MEHVSSSEESIISQETYK	129949352
sp|P02663|CASA2_BOVIN"	MESTEVFTK	576.2381++	2	576.238	MES[+80]TEVFTK	1297485824
sp|P02663|CASA2_BOVIN"	LNREQLSTSEENSKKTVD	1079.5048++ 720.0056+++	2 3	1079.504812 720.005633	LNREQLSTS[+80]EENSKKTVD	2418433168
sp|P02663|CASA2_BOVIN"	NSKKTVDMESTEVFTKK	497.7556++++	4	497.756	NSKKTVDM[+16]ESTEVFTKK	39330752
sp|P02663|CASA2_BOVIN"	KTKLTEEEKN	610.3301++ 407.2225+++	2 3	610.330067 407.22247	KTKLTEEEKN	463546900
sp|P02663|CASA2_BOVIN"	KNTMEHVSSSEESIISQE	1025.9653++ 684.3126+++	2 3	1025.965316 684.312636	KNTM[+16]EHVSSSEESIISQE	570942080
sp|P02663|CASA2_BOVIN"	KNTMEHVSSSE	624.7799++	2	624.78	KNTMEHVSSSE	46365696
sp|P02663|CASA2_BOVIN"	NAVPITPTLNREQLSTSEENS	1150.5719++	2	1150.57	NAVPITPTLNREQLSTSEENS	453337088
sp|P02663|CASA2_BOVIN"	IISQETYKQEK	456.2453+++	3	456.245	IISQETYKQEK	52751912
sp|P02663|CASA2_BOVIN"	YLKTVYQHQ	590.3115++ 393.8767+++	2 3	590.31148 393.876745	YLKTVYQHQ	366497904
sp|P02663|CASA2_BOVIN"	VIPYVRYL	511.8053++	2	511.805	VIPYVRYL	419175552
sp|P02663|CASA2_BOVIN"	KTVDMESTEVFTKKTK	488.7416++++	4	488.742	KTVDMES[+80]TEVFTKKTK	374381440
sp|P02663|CASA2_BOVIN"	KLTEEEKNRL	420.5700+++	3	420.57	KLTEEEKNRL	45643336
sp|P02663|CASA2_BOVIN"	NAVPITPTLNREQLSTSEENSKKTVD	1476.2215++	2	1476.22	NAVPITPTLNREQLS[+80]TSEENSKKTVD	390038144
sp|P02663|CASA2_BOVIN"	KNTMEHVSSSEESIISQETYKQE	975.3830+++	3	975.383	KNTMEHVSS[+80]S[+80]EESIIS[+80]QETYKQE	359165408
sp|P02663|CASA2_BOVIN"	NREQLSTSEENSKK	550.6078+++	3	550.608	NREQLSTSEENSKK	26673914
sp|P02663|CASA2_BOVIN"	RNAVPITPTLNREQLSTSEENSK	888.7711+++	3	888.771	RNAVPITPTLNREQLST[+80]SEENSK	260723296
sp|P02663|CASA2_BOVIN"	KNTMEHVSSSEESIISQETYKQE	1382.6046++ 922.0722+++ 691.8059++++	2 3 4	1382.604594 922.072155 691.805935	KNTMEHVSSSEESIIS[+80]QETYKQE	2091185296
sp|P02663|CASA2_BOVIN"	KNTMEHVSSSEES	772.8004++	2	772.8	KNTMEHVSS[+80]SEES	48440336
sp|P02663|CASA2_BOVIN"	NREQLSTSEENSKKTVDMESTEVFTKK	807.1300++++	4	807.13	NREQLST[+80]SEENSKKTVDMESTEVFTKK	145668384
sp|P02663|CASA2_BOVIN"	LTEEEKNRL	566.3039++ 377.8717+++	2 3	566.303852 377.87166	LTEEEKNRL	308765560
sp|P02663|CASA2_BOVIN"	TVDMESTEVFTKKTK	587.2976+++ 440.7250++++	3 4	587.297598 440.725018	TVDM[+16]ESTEVFTKKTK	359629280
sp|P02663|CASA2_BOVIN"	IQPKTKVIPY	593.8633++	2	593.863	IQPKTKVIPY	394407872
sp|P02663|CASA2_BOVIN"	EVKITVDDKHYQK	801.9279++ 534.9544+++ 401.4676++++	2 3 4	801.927937 534.954383 401.467606	EVKITVDDKHYQK	673890672
sp|P02663|CASA2_BOVIN"	TKKTKLTEEEKNRLN	611.3461+++ 458.7614++++	3 4	611.346051 458.761357	TKKTKLTEEEKNRLN	437331512
sp|P02663|CASA2_BOVIN"	LTEEEKNRLNFLKK	441.2519++++	4	441.252	LTEEEKNRLNFLKK	171906544
sp|P02663|CASA2_BOVIN"	KNTMEHVSSSEESIISQE	1017.9679++ 678.9810+++	2 3	1017.967858 678.980997	KNTMEHVSSSEESIISQE	655912928
sp|P02663|CASA2_BOVIN"	SKKTVDMESTEVFTK	582.6257+++	3	582.626	SKKTVDM[+16]ESTEVFTK	234729264
sp|P02663|CASA2_BOVIN"	NAVPITPTLNREQLSTSEENSKKTVDMESTEVFTKK	1378.0100+++ 1033.7593++++	3 4	1378.010038 1033.759348	NAVPIT[+80]PTLNREQLSTSEENSKKTVDMESTEVFTKK	3278290880
sp|P02663|CASA2_BOVIN"	ALPQYLKTVY	598.3397++	2	598.34	ALPQYLKTVY	405278176
sp|P02663|CASA2_BOVIN"	SAEVATEEVK	531.7693++	2	531.769	SAEVATEEVK	36525428
sp|P02663|CASA2_BOVIN"	KNTMEHVSSSEESIISQETYKQEK	1526.6184++ 1018.0814+++ 763.8128++++	2 3 4	1526.618407 1018.081363 763.812841	KNTMEHVSS[+80]S[+80]EESIIS[+80]QETYKQEK	3556290688
sp|P02663|CASA2_BOVIN"	SKKTVDMESTEVFTKK	619.9924+++ 465.2461++++	3 4	619.992398 465.246117	SKKTVDMESTEVFTKK	306701648
sp|P02663|CASA2_BOVIN"	DKHYQKALNEIN	736.8782++	2	736.878	DKHYQKALNEIN	48571796
sp|P02663|CASA2_BOVIN"	TKVIPY	360.7182++	2	360.718	TKVIPY	276026464
sp|P02663|CASA2_BOVIN"	YQKFALPQYL	635.8452++	2	635.845	YQKFALPQYL	83442928
sp|P02663|CASA2_BOVIN"	LNREQLSTSEENSKKTVDMESTEVFTKK	1113.5322+++ 835.4010++++	3 4	1113.532237 835.400997	LNREQLS[+80]TSEENSKKTVDMESTEVFTKK LNREQLST[+80]SEENSKKTVDMESTEVFTKK	777915596
sp|P02663|CASA2_BOVIN"	TEEEKNRL	509.7618++	2	509.762	TEEEKNRL	27052428
sp|P02663|CASA2_BOVIN"	KTKLTEEEKNR	459.2562+++	3	459.256	KTKLTEEEKNR	144185520
sp|P02663|CASA2_BOVIN"	LTEEEKNRLNF	464.9088+++	3	464.909	LTEEEKNRLNF	162201152
sp|P02663|CASA2_BOVIN"	EESIISQETYK	703.8080++	2	703.808	EESIIS[+80]QETYK	161409712
sp|P02663|CASA2_BOVIN"	KTVDMESTEVFTKK	574.9388+++	3	574.939	KTVDMES[+80]TEVFTKK	236929456
sp|P02663|CASA2_BOVIN"	HVSSSEESIISQETYKQE	694.3272+++	3	694.327	HVSSSEESIISQETYKQE	39664896
sp|P02663|CASA2_BOVIN"	LKTVYQHQKA	608.3459++ 405.8997+++	2 3	608.345854 405.899662	LKTVYQHQKA	164760191
sp|P02663|CASA2_BOVIN"	YQGPIVLNPWDQV	764.8934++	2	764.893	YQGPIVLNPWDQV	23268198
sp|P02663|CASA2_BOVIN"	YQGPIVLNPWDQVKR	906.9914++ 604.9967+++	2 3	906.991403 604.996694	YQGPIVLNPWDQVKR	417756224
sp|P02663|CASA2_BOVIN"	KNTMEHVSSSEESIISQETYKQEK	1018.0814+++	3	1018.08	KNTMEHVSS[+80]S[+80]EES[+80]IISQETYKQEK	2214157824
sp|P02663|CASA2_BOVIN"	KNTMEHVSSSEESIISQETYKQEK	1018.0814+++ 1018.0814+++ 1018.0814+++	3 3 3	1018.081363 1018.081363 1018.081363	KNTMEHVS[+80]S[+80]SEESIIS[+80]QETYKQEK KNTMEHVS[+80]S[+80]SEES[+80]IISQETYKQEK KNTMEHVS[+80]S[+80]S[+80]EESIISQETYKQEK	6642473472
sp|P02663|CASA2_BOVIN"	REQLSTSEENSKKTVD	617.6412+++	3	617.641	REQLSTSEENSKKTVD	24034516
sp|P02663|CASA2_BOVIN"	NAVPITPTLNREQLSTSEENSKK	1318.6500++	2	1318.65	NAVPITPTLNREQLS[+80]TSEENSKK	154018240
sp|P02663|CASA2_BOVIN"	NAVPITPTLNREQLSTSEE	1090.0176++	2	1090.02	NAVPITPTLNREQLS[+80]TSEE	168869072
sp|P02663|CASA2_BOVIN"	KNTMEHVSSSEESIISQETYKQE	1350.6189++ 900.7483+++ 675.8131++++	2 3 4	1350.618886 900.748349 675.813081	KNTM[+16]EHVSSSEESIISQETYKQE	6660842420
sp|P02663|CASA2_BOVIN"	IISQETYK	491.2662++	2	491.266	IISQETYK	105104992
sp|P02663|CASA2_BOVIN"	LNREQLSTSEENSKKTVDMESTEVFTK	787.3844++++	4	787.384	LNREQLSTSEENSKKTVDM[+16]ESTEVFTK	282279040
sp|P02663|CASA2_BOVIN"	KKISQRYQ	350.8733+++	3	350.873	KKISQRYQ	165890464
sp|P02663|CASA2_BOVIN"	TVDMESTEVFTKK	757.8740++	2	757.874	TVDMESTEVFTKK	257601872
sp|P02663|CASA2_BOVIN"	AMKPWIQPK	557.8075++ 372.2074+++	2 3	557.807519 372.207438	AM[+16]KPWIQPK	272189072
sp|P02663|CASA2_BOVIN"	YLKTVYQHQK	436.5751+++	3	436.575	YLKTVYQHQK	31374034
sp|P02663|CASA2_BOVIN"	ESIISQETYK	639.2867++	2	639.287	ESIIS[+80]QETYK	204040752
sp|P02663|CASA2_BOVIN"	TEEEKNRLNF	640.3175++	2	640.317	TEEEKNRLNF	321292672
sp|P02663|CASA2_BOVIN"	RLNFLKKISQ	416.2592+++	3	416.259	RLNFLKKISQ	60153288
sp|P02663|CASA2_BOVIN"	LNREQLSTSEENSKKTVDMESTEVFTK	1070.8339+++	3	1070.83	LNREQLSTS[+80]EENSKKTVDMESTEVFTK	499426240
sp|P02663|CASA2_BOVIN"	ENSKKTVDMESTEVFTKK	530.0162++++	4	530.016	ENSKKTVDM[+16]ESTEVFTKK	44833992
sp|P02663|CASA2_BOVIN"	KNTMEHVSSSEESIISQETYKQEKN	981.4610+++ 736.3476++++	3 4	981.46098 736.347554	KNTM[+16]EHVSSSEESIISQETYKQEKN	117210322
sp|P02663|CASA2_BOVIN"	LTEEEKNRLNFL	753.4016++ 502.6035+++	2 3	753.401555 502.603462	LTEEEKNRLNFL	679105280
sp|P02663|CASA2_BOVIN"	MESTEVFTKKT	690.8095++	2	690.809	MES[+80]TEVFTKKT	92864600
sp|P02663|CASA2_BOVIN"	AEVATEEVK	488.2533++	2	488.253	AEVATEEVK	44188324
sp|P02663|CASA2_BOVIN"	EQLSTSEENSKKTVDMESTEVFTK	943.0912+++	3	943.091	EQLS[+80]TSEENSKKTVDMESTEVFTK	66044528
sp|P02663|CASA2_BOVIN"	FLKKISQ	432.2711++	2	432.271	FLKKISQ	236064448
sp|P02663|CASA2_BOVIN"	GPIVLNPWDQVK	683.3799++	2	683.38	GPIVLNPWDQVK	140308352
sp|P02663|CASA2_BOVIN"	MESTEVFTKKTK	722.8712++ 482.2499+++	2 3	722.871242 482.24992	M[+16]ESTEVFTKKTK	695802828
sp|P02663|CASA2_BOVIN"	RNAVPITPTLNREQLSTSEENSKK	698.8539++++	4	698.854	RNAVPITPTLNREQLS[+80]TSEENSKK	263935424
sp|P02663|CASA2_BOVIN"	VVRNANEEEY	611.7886++	2	611.789	VVRNANEEEY	78318912
sp|P02663|CASA2_BOVIN"	EVATEEVK	452.7347++	2	452.735	EVATEEVK	15233647
sp|P02663|CASA2_BOVIN"	MESTEVFTKKTKLTEEEKNRLN	912.4489+++	3	912.449	MES[+80]TEVFTKKTKLTEEEKNRLN	201952736
sp|P02663|CASA2_BOVIN"	TMEHVSSSEESIISQETYKQEK	857.4024+++	3	857.402	TMEHVSSSEESIISQETYKQEK	61833664
sp|P02663|CASA2_BOVIN"	STEVFTKKT	520.7848++	2	520.785	STEVFTKKT	22608040
sp|P02663|CASA2_BOVIN"	TEEEKNRLNFLK	507.6071+++	3	507.607	TEEEKNRLNFLK	131293920
sp|P02663|CASA2_BOVIN"	MESTEVFTKKTKLTEEEKNRL	656.0778++++	4	656.078	MES[+80]TEVFTKKTKLTEEEKNRL	128795432
sp|P02663|CASA2_BOVIN"	NAVPITPTLNRE	662.8646++	2	662.865	NAVPITPTLNRE	2498985984
sp|P02663|CASA2_BOVIN"	LNREQLSTSEENSKK	588.3025+++	3	588.303	LNREQLSTSEENSKK	27562500
sp|P02663|CASA2_BOVIN"	QKFALPQYL	554.3135++	2	554.313	QKFALPQYL	80091136
sp|P02663|CASA2_BOVIN"	MESTEVFTKKTKLTEEEKNRLNF	961.4717+++	3	961.472	MES[+80]TEVFTKKTKLTEEEKNRLNF	127988976
sp|P02663|CASA2_BOVIN"	IQPKTKVIPYVRYL	573.3503+++	3	573.35	IQPKTKVIPYVRYL	100401432
sp|P02663|CASA2_BOVIN"	KTKLTEEEK	553.3086++	2	553.309	KTKLTEEEK	30909968
sp|P02663|CASA2_BOVIN"	NAVPITPTLNREQLSTSEENSKKTVDMESTEVFTK	1313.9879+++	3	1313.99	NAVPITPTLNREQLSTSEENSKKTVDM[+16]ESTEVFTK	180523360
sp|P02663|CASA2_BOVIN"	EVVRNANEEE	594.7782++	2	594.778	EVVRNANEEE	41475216
sp|P02663|CASA2_BOVIN"	KLTEEEKNR	573.8093++ 382.8753+++	2 3	573.809302 382.875293	KLTEEEKNR	236015236
sp|P02663|CASA2_BOVIN"	LNREQLSTSEENSK	857.8858++	2	857.886	LNREQLSTS[+80]EENSK	36922224
sp|P02663|CASA2_BOVIN"	ALNEINQFYQKFPQYL	1008.5149++	2	1008.51	ALNEINQFYQKFPQYL	9676864
sp|P02663|CASA2_BOVIN"	LNREQLSTSEENSKKTVDME	785.3762+++	3	785.376	LNREQLSTSEENSKKTVDM[+16]E	70007888
sp|P02663|CASA2_BOVIN"	MESTEVFTKKT	658.8238++ 439.5516+++	2 3	658.82376 439.551599	M[+16]ESTEVFTKKT	368395320
sp|P02663|CASA2_BOVIN"	LNREQLSTSEENSKKTVDMESTEVFTK	1097.4894+++	3	1097.49	LNREQLS[+80]TSEENSKKTVDMES[+80]TEVFTK	71891656
sp|P02663|CASA2_BOVIN"	VKITVDDKHYQK	737.4066++ 491.9402+++ 369.2070++++	2 3 4	737.40664 491.940185 369.206958	VKITVDDKHYQK	986319512
sp|P02663|CASA2_BOVIN"	ESTEVFTKK	534.7822++ 356.8572+++	2 3	534.782221 356.857239	ESTEVFTKK	229174272
sp|P02663|CASA2_BOVIN"	TVDMESTEVFTK	693.8265++	2	693.827	TVDMESTEVFTK	724619840
sp|P02663|CASA2_BOVIN"	ESAEVATEEVK	636.2738++	2	636.274	ES[+80]AEVATEEVK	43897364
sp|P02663|CASA2_BOVIN"	KTVDMESTEVFTK	532.2405+++	3	532.241	KTVDMES[+80]TEVFTK	904405056
sp|P02663|CASA2_BOVIN"	ALPQYLK	416.7500++	2	416.75	ALPQYLK	275062016
sp|P02663|CASA2_BOVIN"	EQLSTSEENSKKTVD	887.8908++	2	887.891	EQLSTS[+80]EENSKKTVD	36089268
sp|P02663|CASA2_BOVIN"	NMAINPSKENLCSTFCKEVVR	795.0571+++	3	795.057	NMAINPSKENLCSTFCKEVVR	6864329728
sp|P02663|CASA2_BOVIN"	MESTEVFTKKT	650.8263++ 434.2200+++	2 3	650.826303 434.219961	MESTEVFTKKT	484479488
sp|P02663|CASA2_BOVIN"	SSEESIISQETYKQEK	655.9611+++	3	655.961	SSEESIIS[+80]QETYKQEK	26885236
sp|P02663|CASA2_BOVIN"	YQGPIVLNPWD	651.3299++	2	651.33	YQGPIVLNPWD	62724468
sp|P02663|CASA2_BOVIN"	ENSKKTVDMESTEVFTKK	526.0175++++	4	526.017	ENSKKTVDMESTEVFTKK	38951716
sp|P02663|CASA2_BOVIN"	KLTEEEKNRLNFLK	441.2519++++	4	441.252	KLTEEEKNRLNFLK	34980620
sp|P02663|CASA2_BOVIN"	KNTMEHVSSSEESIISQETYKQEKNMAINPSKENLCSTFC	1146.0277++++	4	1146.03	KNTM[+16]EHVSSSEESIISQETYKQEKNMAINPSKENLCSTFC	49406256
sp|P02663|CASA2_BOVIN"	MEHVSSSEESIISQETYK	700.6528+++	3	700.653	M[+16]EHVSSSEESIISQETYK	64722508
sp|P02666|CASB_BOVIN"	SLSQSKVLPVPQK	705.9194++ 470.9487+++	2 3	705.919383 470.948681	SLSQSKVLPVPQK	2155991040
sp|P02666|CASB_BOVIN"	AVPYPQRDMPIQAF	816.9138++	2	816.914	AVPYPQRDMPIQAF	1623282816
sp|P02666|CASB_BOVIN"	RELEELNVPGEIVESLSSSEESITRINK	1053.2123+++ 790.1610++++	3 4	1053.212282 790.16103	RELEELNVPGEIVESLSSSEESITRINK	1076511360
sp|P02666|CASB_BOVIN"	RELEELNVPGEIVESLSSSEE	1213.0545++	2	1213.05	RELEELNVPGEIVESLSS[+80]SEE	2334425600
sp|P02666|CASB_BOVIN"	RELEELNVPGEIVESLSSSEES	1216.5874++ 811.3940+++	2 3	1216.58738 811.394012	RELEELNVPGEIVESLSSSEES	1874912448
sp|P02666|CASB_BOVIN"	KIEKFQSEEQQQTED	933.9394++ 622.9620+++	2 3	933.939427 622.962043	KIEKFQSEEQQQTED	111155554304
sp|P02666|CASB_BOVIN"	KIEKFQSEE	609.2761++	2	609.276	KIEKFQS[+80]EE	4666514944
sp|P02666|CASB_BOVIN"	YQEPVLGPVRGPFPII	891.5011++	2	891.501	YQEPVLGPVRGPFPII	829641152
sp|P02666|CASB_BOVIN"	ELQDKIHPFAQTQS	821.4152++ 547.9459+++	2 3	821.415194 547.945888	ELQDKIHPFAQTQS	8281788928
sp|P02666|CASB_BOVIN"	RELEELNVPGEIVESLSSSEESITRIN	1063.8248+++	3	1063.82	RELEELNVPGEIVESLSS[+80]S[+80]EESITRIN	7235167232
sp|P02666|CASB_BOVIN"	RELEELNVPGEIVESL	953.4639++ 635.9784+++	2 3	953.463896 635.978356	RELEELNVPGEIVES[+80]L	4802722320
sp|P02666|CASB_BOVIN"	KIHPFAQTQ	535.2931++	2	535.293	KIHPFAQTQ	3490802432
sp|P02666|CASB_BOVIN"	EESITRIN	481.2511++	2	481.251	EESITRIN	670461760
sp|P02666|CASB_BOVIN"	KIEKFQSEEQQQTE	916.4091++ 611.2752+++	2 3	916.409121 611.275172	KIEKFQS[+80]EEQQQTE	7047785984
sp|P02666|CASB_BOVIN"	PVVVPPFLQ	498.2999++	2	498.3	PVVVPPFLQ	178952608
sp|P02666|CASB_BOVIN"	KIEKFQSEEQQQTEDELQDKIHPF	1018.8079+++ 764.3578++++	3 4	1018.807918 764.357758	KIEKFQS[+80]EEQQQTEDELQDKIHPF	5835001856
sp|P02666|CASB_BOVIN"	VMGVSKVKEAMAPKH	548.6251+++ 411.7206++++	3 4	548.625104 411.720647	VM[+16]GVSKVKEAM[+16]APKH	884966048
sp|P02666|CASB_BOVIN"	GVSKVKEAMAPK	630.8527++ 420.9042+++	2 3	630.852655 420.904195	GVSKVKEAM[+16]APK	15833564672
sp|P02666|CASB_BOVIN"	RELEELNVPGEIVESLSSSEE	1213.0545++ 809.0388+++	2 3	1213.054532 809.03878	RELEELNVPGEIVESLS[+80]SSEE	3577977856
sp|P02666|CASB_BOVIN"	RELEELNVPGEIVESLSSSEE	1213.0545++ 809.0388+++	2 3	1213.054532 809.03878	RELEELNVPGEIVES[+80]LSSSEE	3577977856
sp|P02666|CASB_BOVIN"	KIHPFAQTQS	578.8091++ 386.2085+++	2 3	578.809105 386.208495	KIHPFAQTQS	7210944512
sp|P02666|CASB_BOVIN"	MPFPKYPVEPFTESQSL	1006.9873++	2	1006.99	M[+16]PFPKYPVEPFTESQSL	173869024
sp|P02666|CASB_BOVIN"	KIEKFQSEEQQQTE	876.4260++ 584.6197+++	2 3	876.425955 584.619729	KIEKFQSEEQQQTE	4635264640
sp|P02666|CASB_BOVIN"	KIEKFQSEEQQ	697.3515++ 465.2368+++	2 3	697.351531 465.236779	KIEKFQSEEQQ	1633352352
sp|P02666|CASB_BOVIN"	KIEKFQSEEQQQTEDELQDKIHPFAQTQSL	901.4457++++	4	901.446	KIEKFQSEEQQQTEDELQDKIHPFAQTQSL	3476404736
sp|P02666|CASB_BOVIN"	KIHPFAQTQSL	635.3511++ 423.9032+++	2 3	635.351137 423.903183	KIHPFAQTQSL	5343174528
sp|P02666|CASB_BOVIN"	RELEELNVPGEIVESLSSSEESITRIN	1037.1694+++ 1037.1694+++	3 3	1037.169404 1037.169404	RELEELNVPGEIVESLSSS[+80]EESITRIN RELEELNVPGEIVESLSS[+80]SEESITRIN	2350188544
sp|P02666|CASB_BOVIN"	RELEELNVPGEIVESLSSSEESITRIN	1037.1694+++	3	1037.17	RELEELNVPGEIVESLS[+80]SSEESITRIN	1175094272
sp|P02666|CASB_BOVIN"	VMGVSKVKEAMAPKHK	585.9918+++ 585.9918+++ 439.7457++++	3 3 4	585.991787 585.991787 439.745659	VMGVSKVKEAM[+16]APKHK VM[+16]GVSKVKEAMAPKHK	1096660352
sp|P02666|CASB_BOVIN"	KIEKFQSEEQQQTEDELQDK	1240.5930++ 827.3978+++ 620.8001++++	2 3 4	1240.592997 827.397757 620.800137	KIEKFQSEEQQQTEDELQDK	47278036992
sp|P02666|CASB_BOVIN"	KIEKFQSEEQQQTEDELQDKIHPFAQTQS	1163.8971+++ 873.1747++++	3 4	1163.897133 873.174669	KIEKFQSEEQQQTEDELQDKIHPFAQTQS	7957121536
sp|P02666|CASB_BOVIN"	RELEELNVPGEIVESL	913.4807++	2	913.481	RELEELNVPGEIVESL	3092817152
sp|P02666|CASB_BOVIN"	RELEELNVPGEIVESLSSSEESITR	988.1159+++	3	988.116	RELEELNVPGEIVESLSS[+80]S[+80]EESITR	4789433344
sp|P02666|CASB_BOVIN"	RELEELNVPGEIVESLSSSEESITR	988.1159+++ 988.1159+++	3 3	988.115851 988.115851	RELEELNVPGEIVESLS[+80]S[+80]SEESITR RELEELNVPGEIVES[+80]LSSS[+80]EESITR	9578866688
sp|P02666|CASB_BOVIN"	YQEPVLGPVRGPFPI	834.9590++	2	834.959	YQEPVLGPVRGPFPI	1174607744
sp|P02666|CASB_BOVIN"	RELEELNVPGEIVESLSSSEESITRINK	830.1442++++	4	830.144	RELEELNVPGEIVESLSSS[+80]EES[+80]ITRINK	778090880
sp|P02666|CASB_BOVIN"	VENLHLPLPLLQ	693.4112++	2	693.411	VENLHLPLPLLQ	1666065792
sp|P02666|CASB_BOVIN"	FQSEEQQQTEDELQDK	991.4347++ 661.2922+++	2 3	991.434706 661.292229	FQSEEQQQTEDELQDK	3032867840
sp|P02666|CASB_BOVIN"	RELEELNVPGEIVESLSSSEESITRINK	1106.5232+++ 1106.5232+++ 1106.5232+++ 830.1442++++	3 3 3 4	1106.523169 1106.523169 1106.523169 830.144196	RELEELNVPGEIVES[+80]LSSSEES[+80]ITRINK RELEELNVPGEIVES[+80]LSS[+80]SEESITRINK RELEELNVPGEIVES[+80]LS[+80]SSEESITRINK	4940402304
sp|P02666|CASB_BOVIN"	KFQSEEQQQTEDELQDK	730.6460+++	3	730.646	KFQS[+80]EEQQQTEDELQDK	208468848
sp|P02666|CASB_BOVIN"	GVSKVKEAMAPK	622.8552++ 415.5726+++	2 3	622.855198 415.572557	GVSKVKEAMAPK	24242824704
sp|P02666|CASB_BOVIN"	KIEKFQSEEQ	633.3222++	2	633.322	KIEKFQSEEQ	455086272
sp|P02666|CASB_BOVIN"	GVSKVKEAMAPKHK	503.9572+++ 378.2197++++	3 4	503.957182 378.219706	GVSKVKEAMAPKHK	1562950400
sp|P02666|CASB_BOVIN"	RELEELNVPGEIVESLSSSEESITRINK	1106.5232+++	3	1106.52	RELEELNVPGEIVESLS[+80]S[+80]SEESITRINK	1385238656
sp|P02666|CASB_BOVIN"	RELEELNVPGEIVESLSSSEE	1173.0714++ 782.3833+++	2 3	1173.071366 782.383336	RELEELNVPGEIVESLSSSEE	2256596352
sp|P02666|CASB_BOVIN"	NVPGEIVESLSSSEESITRIN	754.0483+++	3	754.048	NVPGEIVESLSSSEESITRIN	115737168
sp|P02666|CASB_BOVIN"	RELEELNVPGEIVESLSSSEESITR	1401.7038++ 934.8050+++	2 3	1401.703807 934.804963	RELEELNVPGEIVESLSSSEESITR	3510405072
sp|P02666|CASB_BOVIN"	VKEAMAPKHKEMPFPKY	512.5180++++	4	512.518	VKEAM[+16]APKHKEMPFPKY	149348384
sp|P02666|CASB_BOVIN"	KIEKFQSE	544.7548++	2	544.755	KIEKFQS[+80]E	3358293248
sp|P02666|CASB_BOVIN"	KIEKFQSEEQQQTEDELQDKIH	683.3359++++	4	683.336	KIEKFQSEEQQQTEDELQDKIH	473298496
sp|P02666|CASB_BOVIN"	RELEELNVPGEIVESLS	956.9967++	2	956.997	RELEELNVPGEIVESLS	414813824
sp|P02666|CASB_BOVIN"	RDMPIQAFLLY	683.8630++	2	683.863	RDMPIQAFLLY	120628960
sp|P02666|CASB_BOVIN"	KIEKFQSEEQQQTEDELQD	1176.5455++ 784.6994+++	2 3	1176.545516 784.699436	KIEKFQSEEQQQTEDELQD	26268572160
sp|P02666|CASB_BOVIN"	KIEKFQSEEQQQTED	973.9226++ 649.6175+++	2 3	973.922592 649.617487	KIEKFQS[+80]EEQQQTED	122479960064
sp|P02666|CASB_BOVIN"	SSSEESITRIN	611.7991++	2	611.799	SSSEESITRIN	908677696
sp|P02666|CASB_BOVIN"	RELEELNVPGEIVESLSSSEESITRIN	1090.4803+++ 1090.4803+++ 1090.4803+++ 1090.4803+++	3 3 3 3	1090.480292 1090.480292 1090.480292 1090.480292	RELEELNVPGEIVESLS[+80]S[+80]S[+80]EESITRIN RELEELNVPGEIVES[+80]LSS[+80]S[+80]EESITRIN RELEELNVPGEIVES[+80]LS[+80]SS[+80]EESITRIN RELEELNVPGEIVES[+80]LS[+80]S[+80]SEESITRIN	12838311936
sp|P02666|CASB_BOVIN"	IEKFQSEEQQQTED	909.8751++ 606.9192+++	2 3	909.875111 606.919166	IEKFQS[+80]EEQQQTED	8663668928
sp|P02666|CASB_BOVIN"	FQSEEQQQTED	684.7811++	2	684.781	FQSEEQQQTED	705915456
sp|P02666|CASB_BOVIN"	EMPFPKYPVEPFTESQS	1014.9666++	2	1014.97	EM[+16]PFPKYPVEPFTESQS	187902992
sp|P02666|CASB_BOVIN"	RELEELNVPGEIVE	813.4227++ 542.6175+++	2 3	813.422684 542.617548	RELEELNVPGEIVE	21194893392
sp|P02666|CASB_BOVIN"	VLPVPQKAVPYPQRDMPIQAF	798.7716+++	3	798.772	VLPVPQKAVPYPQRDMPIQAF	2211223552
sp|P02666|CASB_BOVIN"	IEKFQSEEQQQTEDELQD	1112.4980++ 742.0011+++	2 3	1112.498034 742.001115	IEKFQSEEQQQTEDELQD	2197265024
sp|P02666|CASB_BOVIN"	SSEESITRINK	712.2969++	2	712.297	S[+80]S[+80]EESITRINK	652384256
sp|P02666|CASB_BOVIN"	RELEELNVPGEIVESLSSSEESIT	936.0821+++	3	936.082	RELEELNVPGEIVESLS[+80]S[+80]SEESIT	198072432
sp|P02666|CASB_BOVIN"	SKVKEAMAPK	544.8103++ 363.5426+++	2 3	544.810259 363.542598	SKVKEAMAPK	890943440
sp|P02666|CASB_BOVIN"	KIHPFAQT	471.2638++	2	471.264	KIHPFAQT	641449408
sp|P02666|CASB_BOVIN"	SEEQQQTEDELQDK	853.8712++	2	853.871	SEEQQQTEDELQDK	250959872
sp|P02666|CASB_BOVIN"	HKEMPFPKY	588.7972++ 392.8672+++	2 3	588.797151 392.867193	HKEMPFPKY	1337176864
sp|P02666|CASB_BOVIN"	SEESITRINKK	462.2326+++	3	462.233	S[+80]EESITRINKK	369558336
sp|P02666|CASB_BOVIN"	KIEKFQSEEQ	673.3054++	2	673.305	KIEKFQS[+80]EEQ	1111192064
sp|P02666|CASB_BOVIN"	KIEKFQSEEQQQTEDELQD	1216.5287++ 811.3549+++	2 3	1216.528681 811.354879	KIEKFQS[+80]EEQQQTEDELQD	39021703168
sp|P02666|CASB_BOVIN"	LLYQEPVLGPVRGPFP	891.5011++	2	891.501	LLYQEPVLGPVRGPFP	51167440
sp|P02666|CASB_BOVIN"	IEKFQSEEQQQTEDELQDK	1216.5287++ 811.3549+++	2 3	1216.528681 811.354879	IEKFQS[+80]EEQQQTEDELQDK	39125266944
sp|P02666|CASB_BOVIN"	VLPVPQKAVPYPQRDMPIQAF	804.1032+++	3	804.103	VLPVPQKAVPYPQRDM[+16]PIQAF	3942117376
sp|P02666|CASB_BOVIN"	NKKIEKFQSEEQQQTED	1055.0084++	2	1055.01	NKKIEKFQSEEQQQTED	47455384
sp|P02666|CASB_BOVIN"	GVSKVKEAMAPKHK	509.2888+++ 382.2184++++	3 4	509.28882 382.218434	GVSKVKEAM[+16]APKHK	3039480256
sp|P02666|CASB_BOVIN"	VMGVSKVKEAMAPK	497.6072+++ 373.4572++++	3 4	497.607162 373.45719	VMGVSKVKEAM[+16]APK	1978019936
sp|P02666|CASB_BOVIN"	IEKFQSEEQQQTE	812.3785++	2	812.378	IEKFQSEEQQQTE	453594880
sp|P02666|CASB_BOVIN"	INKKIEKFQSEEQQQTED	1151.5336++	2	1151.53	INKKIEKFQS[+80]EEQQQTED	488916832
sp|P02666|CASB_BOVIN"	KIEKFQSEEQQQTEDELQDKIHPFAQTQS	1190.5526+++	3	1190.55	KIEKFQS[+80]EEQQQTEDELQDKIHPFAQTQS	2502291712
sp|P02666|CASB_BOVIN"	RELEELNVPGEIVESLSSSEESITR	1481.6701++	2	1481.67	RELEELNVPGEIVESLS[+80]SS[+80]EESITR	309300064
sp|P02666|CASB_BOVIN"	KIEKFQSEEQQQTEDELQ	1159.0152++ 773.0126+++	2 3	1159.01521 773.012565	KIEKFQS[+80]EEQQQTEDELQ	6423494656
sp|P02666|CASB_BOVIN"	KIEKFQSEEQQQTEDELQDKIHPFAQTQ	1161.5419+++ 871.4082++++	3 4	1161.541901 871.408245	KIEKFQS[+80]EEQQQTEDELQDKIHPFAQTQ	4882348800
sp|P02666|CASB_BOVIN"	DKIHPFAQTQ	592.8066++	2	592.807	DKIHPFAQTQ	1098359296
sp|P02666|CASB_BOVIN"	VLPVPQKAVPYPQRD	853.9830++ 569.6578+++	2 3	853.983046 569.65779	VLPVPQKAVPYPQRD	5369862272
sp|P02666|CASB_BOVIN"	RELEELNVPGEIVESLSSSEESITRINK	1079.8677+++ 810.1526++++	3 4	1079.867725 810.152613	RELEELNVPGEIVESLS[+80]SSEESITRINK	718031744
sp|P02666|CASB_BOVIN"	RELEELNVPGEIVESLSSSEESITRINK	1079.8677+++ 810.1526++++	3 4	1079.867725 810.152613	RELEELNVPGEIVES[+80]LSSSEESITRINK	718031744
sp|P02666|CASB_BOVIN"	HKEMPFPKYPVEPFTESQS	1139.5461++ 760.0331+++ 570.2767++++	2 3 4	1139.546079 760.033145 570.276677	HKEMPFPKYPVEPFTESQS	5587304432
sp|P02666|CASB_BOVIN"	IEKFQSEEQQQTE	852.3616++	2	852.362	IEKFQS[+80]EEQQQTE	395123200
sp|P02666|CASB_BOVIN"	KIEKFQSEEQQQTEDELQDK	1280.5762++ 854.0532+++ 640.7917++++	2 3 4	1280.576163 854.0532 640.791719	KIEKFQS[+80]EEQQQTEDELQDK	30704719936
sp|P02666|CASB_BOVIN"	AVPYPQRDMPIQAFLL	937.9953++	2	937.995	AVPYPQRDM[+16]PIQAFLL	323039872
sp|P02666|CASB_BOVIN"	ELQDKIHPF	563.7982++ 376.2012+++	2 3	563.798206 376.201229	ELQDKIHPF	4528969728
sp|P02666|CASB_BOVIN"	KIEKFQSEEQQQT	851.8878++	2	851.888	KIEKFQS[+80]EEQQQT	691755328
sp|P02666|CASB_BOVIN"	HKEMPFPKYPVEPFTESQSLTLTDVEN	795.6365++++	4	795.636	HKEM[+16]PFPKYPVEPFTESQSLTLTDVEN	243344784
sp|P02666|CASB_BOVIN"	SLSQSKVLPVPQ	641.8719++	2	641.872	SLSQSKVLPVPQ	1244491904
sp|P02666|CASB_BOVIN"	HKEMPFPKYPVEPFTESQSL	1204.0856++ 803.0595+++ 602.5464++++	2 3 4	1204.085568 803.059471 602.546422	HKEM[+16]PFPKYPVEPFTESQSL	5212231024
sp|P02666|CASB_BOVIN"	IEKFQSEEQQQTEDELQD	1152.4812++ 768.6566+++	2 3	1152.4812 768.656558	IEKFQS[+80]EEQQQTEDELQD	1820884416
sp|P02666|CASB_BOVIN"	MPFPKYPVEPFTESQSL	998.9899++ 666.3290+++	2 3	998.989877 666.32901	MPFPKYPVEPFTESQSL	292179400
sp|P02666|CASB_BOVIN"	HKEMPFPKYPVEPFTESQSLT	831.4104+++	3	831.41	HKEMPFPKYPVEPFTESQSLT	313163712
sp|P02666|CASB_BOVIN"	INKKIEKFQSEEQQQTEDELQDK	945.8051+++	3	945.805	INKKIEKFQSEEQQQTEDELQDK	442923200
sp|P02666|CASB_BOVIN"	HKEMPFPKYPVEPFTESQ	731.0225+++ 548.5187++++	3 4	731.022468 548.51867	HKEMPFPKYPVEPFTESQ	902011832
sp|P02666|CASB_BOVIN"	KIEKFQSEEQQQTEDE	998.4607++ 665.9762+++	2 3	998.460723 665.976241	KIEKFQSEEQQQTEDE	1370596640
sp|P02666|CASB_BOVIN"	VMGVSKVKEAMAPK	745.9071++ 497.6072+++ 373.4572++++	2 3 4	745.907104 497.607162 373.45719	VM[+16]GVSKVKEAMAPK	1450449920
sp|P02666|CASB_BOVIN"	KIEKFQSEEQQQ	801.3640++	2	801.364	KIEKFQS[+80]EEQQQ	897154112
sp|P02666|CASB_BOVIN"	YQEPVLGPVRGPFP	778.4170++	2	778.417	YQEPVLGPVRGPFP	1389343488
sp|P02666|CASB_BOVIN"	ELQDKIHPFAQTQ	777.8992++ 518.9352+++	2 3	777.899179 518.935212	ELQDKIHPFAQTQ	5969838336
sp|P02666|CASB_BOVIN"	KIEKFQSEEQQ	737.3347++	2	737.335	KIEKFQS[+80]EEQQ	2347213056
sp|P02666|CASB_BOVIN"	SLSQSKVLPVPQKAVPYPQRDMPIQAF	1008.8828+++ 756.9139++++	3 4	1008.882825 756.913938	SLSQSKVLPVPQKAVPYPQRDMPIQAF	2119656320
sp|P02666|CASB_BOVIN"	IHPFAQTQSL	571.3037++	2	571.304	IHPFAQTQSL	1069638912
sp|P02666|CASB_BOVIN"	HKEMPFPKYPVEPFTESQSL	1196.0881++ 797.7278+++ 598.5477++++	2 3 4	1196.088111 797.727833 598.547693	HKEMPFPKYPVEPFTESQSL	6138352704
sp|P02666|CASB_BOVIN"	EMPFPKYPVEPF	740.8627++	2	740.863	EMPFPKYPVEPF	28370266
sp|P02666|CASB_BOVIN"	RELEELNVPGEIVESLSSSEESITR	1481.6701++ 988.1159+++	2 3	1481.670138 988.115851	RELEELNVPGEIVES[+80]LS[+80]SSEESITR	5176322496
sp|P02666|CASB_BOVIN"	VMGVSKVKEAMAPK	753.9046++ 502.9388+++ 377.4559++++	2 3 4	753.904562 502.9388 377.455919	VM[+16]GVSKVKEAM[+16]APK	2529310840
sp|P02666|CASB_BOVIN"	KIEKFQSEEQQQ	761.3808++ 507.9230+++	2 3	761.380819 507.922972	KIEKFQSEEQQQ	1142486080
sp|P02666|CASB_BOVIN"	SKVKEAMAPKHK	451.9272+++	3	451.927	SKVKEAMAPKHK	22736290
sp|P02666|CASB_BOVIN"	RDMPIQAFL	545.7893++	2	545.789	RDMPIQAFL	278493984
sp|P02666|CASB_BOVIN"	SKVKEAMAPKH	409.2289+++	3	409.229	SKVKEAMAPKH	349151968
sp|P02666|CASB_BOVIN"	RELEELNVPGEIVESLSSSEESITR	961.4604+++ 961.4604+++	3 3	961.460407 961.460407	RELEELNVPGEIVESLSSS[+80]EESITR RELEELNVPGEIVESLSS[+80]SEESITR	1511244288
sp|P02666|CASB_BOVIN"	RELEELNVPGEIVESLSSSEESITR	961.4604+++	3	961.46	RELEELNVPGEIVESLS[+80]SSEESITR	755622144
sp|P02666|CASB_BOVIN"	RELEELNVPGEIVESLSSSEE	1253.0377++	2	1253.04	RELEELNVPGEIVESLSS[+80]S[+80]EE	2827241728
sp|P02666|CASB_BOVIN"	RELEELNVPGEIVESLSSSEE	1253.0377++	2	1253.04	RELEELNVPGEIVESLS[+80]S[+80]SEE	2827241728
sp|P02666|CASB_BOVIN"	KIEKFQSEEQQQTEDE	1038.4439++ 692.6317+++	2 3	1038.443889 692.631685	KIEKFQS[+80]EEQQQTEDE	1762704320
sp|P02666|CASB_BOVIN"	ESITRINK	480.7773++	2	480.777	ESITRINK	1288603776
sp|P02666|CASB_BOVIN"	PVEPFTESQSLTL	724.3694++	2	724.369	PVEPFTESQSLTL	18869176
sp|P02666|CASB_BOVIN"	FQSEEQQQTEDELQDKIHPFAQTQS	997.7916+++	3	997.792	FQSEEQQQTEDELQDKIHPFAQTQS	495677536
sp|P02666|CASB_BOVIN"	KIEKFQSEEQQQTEDELQDKIHPFA	1042.4870+++ 782.1170++++	3 4	1042.486956 782.117036	KIEKFQS[+80]EEQQQTEDELQDKIHPFA	2409567232
sp|P02666|CASB_BOVIN"	KIEKFQS	480.2335++	2	480.234	KIEKFQS[+80]	817802240
sp|P02666|CASB_BOVIN"	KIEKFQSEEQQQT	811.9047++ 541.6055+++	2 3	811.904659 541.605531	KIEKFQSEEQQQT	1020959136
sp|P02666|CASB_BOVIN"	NKKIEKFQSEEQQQTED	1094.9915++	2	1094.99	NKKIEKFQS[+80]EEQQQTED	111216464
sp|P02666|CASB_BOVIN"	KKIEKFQSEEQQQTED	1037.9701++	2	1037.97	KKIEKFQS[+80]EEQQQTED	250604208
sp|P02666|CASB_BOVIN"	IEKFQSEEQQQTED	869.8919++ 580.2637+++	2 3	869.891945 580.263722	IEKFQSEEQQQTED	7351912448
sp|P02666|CASB_BOVIN"	PVVVPPFLQPEVM	734.3994++	2	734.399	PVVVPPFLQPEVM[+16]	182315184
sp|P02666|CASB_BOVIN"	SSSEESITR	498.2356++	2	498.236	SSSEESITR	58589452
sp|P02666|CASB_BOVIN"	KFQSEEQQQTEDELQDK	1055.4822++ 703.9906+++	2 3	1055.482187 703.99055	KFQSEEQQQTEDELQDK	929435024
sp|P02666|CASB_BOVIN"	LSLSQSKVLPVPQKAVPYPQRDMPIQAF	1051.9092+++ 789.1837++++	3 4	1051.909152 789.183683	LSLSQSKVLPVPQKAVPYPQRDM[+16]PIQAF	806752192
sp|P02666|CASB_BOVIN"	KIEKFQSEEQQQTEDELQ	1119.0320++	2	1119.03	KIEKFQSEEQQQTEDELQ	642968320
sp|P02666|CASB_BOVIN"	GVSKVKEAMAPKHKEMPFPK	564.5564++++ 564.5564++++	4 4	564.55643 564.55643	GVSKVKEAMAPKHKEM[+16]PFPK GVSKVKEAM[+16]APKHKEMPFPK	253273088
sp|P02666|CASB_BOVIN"	KIEKFQSEEQQQTEDELQDKIHPFAQTQSL	1228.2473+++	3	1228.25	KIEKFQS[+80]EEQQQTEDELQDKIHPFAQTQSL	1752056576
sp|P02666|CASB_BOVIN"	RELEELNVPGEIVESLS	996.9799++ 996.9799++	2 2	996.97991 996.97991	RELEELNVPGEIVESLS[+80] RELEELNVPGEIVES[+80]LS	303886400
sp|P02666|CASB_BOVIN"	ELQDKIHPFAQTQSL	877.9572++	2	877.957	ELQDKIHPFAQTQSL	2131313792
sp|P02666|CASB_BOVIN"	KIHPFA	356.7107++	2	356.711	KIHPFA	1568767616
sp|P02666|CASB_BOVIN"	LSQSKVLPVPQKAVPYPQRD	750.7583+++	3	750.758	LSQSKVLPVPQKAVPYPQRD	141214112
sp|P02666|CASB_BOVIN"	VENLHLPLPLLQS	736.9272++	2	736.927	VENLHLPLPLLQS	152104976
sp|P02666|CASB_BOVIN"	ELQDKIHPFAQ	663.3461++	2	663.346	ELQDKIHPFAQ	205944208
sp|P02666|CASB_BOVIN"	IEKFQSEEQQQTEDELQ	1094.9677++	2	1094.97	IEKFQS[+80]EEQQQTEDELQ	112923832
sp|P02666|CASB_BOVIN"	RELEELNVPGEIVESLSSSEESITR	1014.7713+++	3	1014.77	RELEELNVPGEIVES[+80]LS[+80]SS[+80]EESITR	500757472
sp|P02666|CASB_BOVIN"	HKEMPFPKYPVEPFTE	659.3256+++	3	659.326	HKEMPFPKYPVEPFTE	432118176
sp|P02666|CASB_BOVIN"	SQSKVLPVPQKAVPYPQRDMPIQAF	706.8849++++	4	706.885	SQSKVLPVPQKAVPYPQRDMPIQAF	436024032
sp|P02666|CASB_BOVIN"	VLPVPQKAVPYPQRDMPIQA	749.7488+++	3	749.749	VLPVPQKAVPYPQRDMPIQA	523791712
sp|P02666|CASB_BOVIN"	INKKIEKFQSEEQQQTEDELQDK	972.4605+++ 729.5972++++	3 4	972.460519 729.597208	INKKIEKFQS[+80]EEQQQTEDELQDK	1604425856
sp|P02666|CASB_BOVIN"	SITRINKKIEK	443.9453+++	3	443.945	SITRINKKIEK	403691456
sp|P02666|CASB_BOVIN"	RELEELNVPGEIVESLSSSE	1148.5332++	2	1148.53	RELEELNVPGEIVESLS[+80]SSE	148676720
sp|P02666|CASB_BOVIN"	RELEELNVPGEIVESLSSSEESITRINK	1133.1786+++	3	1133.18	RELEELNVPGEIVESLS[+80]S[+80]S[+80]EESITRINK	265850016
sp|P02666|CASB_BOVIN"	VKEAMAPKHKEMPFPK	471.7522++++	4	471.752	VKEAMAPKHKEM[+16]PFPK	205760864
sp|P02666|CASB_BOVIN"	VMGVSKVKEAMAPKHK	580.6601+++ 435.7469++++	3 4	580.660148 435.74693	VMGVSKVKEAMAPKHK	1121951424
sp|P02666|CASB_BOVIN"	ELQDKIHPFA	599.3168++	2	599.317	ELQDKIHPFA	852722240
sp|P02666|CASB_BOVIN"	INKKIEKFQSEEQQQTED	1111.5504++ 741.3694+++	2 3	1111.550404 741.369361	INKKIEKFQSEEQQQTED	2826521672
sp|P02666|CASB_BOVIN"	SSSEESITRINK	450.9002+++	3	450.9	SSSEESITRINK	297898048
sp|P02666|CASB_BOVIN"	VMGVSKVKEAMAPKH	537.9618+++	3	537.962	VMGVSKVKEAMAPKH	525897696
sp|P02666|CASB_BOVIN"	VSKVKEAMAP	538.2944++	2	538.294	VSKVKEAM[+16]AP	167438784
sp|P02666|CASB_BOVIN"	VSKVKEAMAPKH	447.5833+++	3	447.583	VSKVKEAM[+16]APKH	285523360
sp|P02666|CASB_BOVIN"	VSKVKEAMAPK	594.3445++ 396.5654+++	2 3	594.344466 396.565402	VSKVKEAMAPK	1777312640
sp|P02666|CASB_BOVIN"	KKIEKFQSEEQQ	801.3822++ 534.5905+++	2 3	801.382178 534.590544	KKIEKFQS[+80]EEQQ	1752016832
sp|P02666|CASB_BOVIN"	VSKVKEAMAPKH	662.8739++ 442.2517+++	2 3	662.873922 442.251706	VSKVKEAMAPKH	377038669
sp|P02666|CASB_BOVIN"	VSKVKEAMAPK	602.3419++ 401.8970+++	2 3	602.341923 401.897041	VSKVKEAM[+16]APK	918330448
sp|P02666|CASB_BOVIN"	SLSQSKVLPVPQKAVPYPQRD	779.7690+++ 585.0786++++	3 4	779.76902 585.078584	SLSQSKVLPVPQKAVPYPQRD	2034805184
sp|P02666|CASB_BOVIN"	KIEKFQSEEQQQTEDELQDKIHPFAQTQ	1134.8865+++ 851.4167++++	3 4	1134.886457 851.416662	KIEKFQSEEQQQTEDELQDKIHPFAQTQ	3819538240
sp|P02666|CASB_BOVIN"	FQSEEQQQTEDELQDKIHPF	826.0469+++	3	826.047	FQSEEQQQTEDELQDKIHPF	344341312
sp|P02666|CASB_BOVIN"	GVSKVKEAMAPKH	691.3847++ 461.2589+++	2 3	691.384654 461.258861	GVSKVKEAMAPKH	1578695848
sp|P02666|CASB_BOVIN"	RELEELNVPGEIVES	896.9219++ 598.2837+++	2 3	896.921864 598.283668	RELEELNVPGEIVES[+80]	2525366408
sp|P02666|CASB_BOVIN"	NVPGEIVESLSSSEESITRINK	796.7466+++	3	796.747	NVPGEIVESLSSSEESITRINK	33359684
sp|P02666|CASB_BOVIN"	EPVLGPVRGPFP	632.8561++	2	632.856	EPVLGPVRGPFP	881660928
sp|P02666|CASB_BOVIN"	RELEELNVPGEIVESLSSSEESITRINK	1133.1786+++ 1133.1786+++ 850.1358++++	3 3 4	1133.178613 1133.178613 850.135779	RELEELNVPGEIVES[+80]LS[+80]SS[+80]EESITRINK RELEELNVPGEIVES[+80]LS[+80]S[+80]SEESITRINK	14292101280
sp|P02666|CASB_BOVIN"	RELEELNVPGEIVESLSSSEESITRINKK	842.1764++++	4	842.176	RELEELNVPGEIVESLS[+80]SSEESITRINKK	101418464
sp|P02666|CASB_BOVIN"	VMGVSKVKEAMAP	681.8596++ 681.8596++	2 2	681.859623 681.859623	VMGVSKVKEAM[+16]AP VM[+16]GVSKVKEAMAP	344168832
sp|P02666|CASB_BOVIN"	EQQQTEDELQDK	745.8339++	2	745.834	EQQQTEDELQDK	386728672
sp|P02666|CASB_BOVIN"	HKEMPFPKYPVE	501.2551+++	3	501.255	HKEMPFPKYPVE	860834944
sp|P02666|CASB_BOVIN"	RELEELNVPGEIVESLSS	1000.5128++	2	1000.51	RELEELNVPGEIVESLSS	154374368
sp|P02666|CASB_BOVIN"	RELEELNVPGEIVESLSSSEE	1253.0377++ 835.6942+++	2 3	1253.037697 835.694223	RELEELNVPGEIVES[+80]LS[+80]SSEE	4674393344
sp|P02666|CASB_BOVIN"	KIEKFQSEEQQQTEDEL	1094.9859++	2	1094.99	KIEKFQS[+80]EEQQQTEDEL	447621440
sp|P02666|CASB_BOVIN"	RELEELNVPGEIVESLSSS	1044.0288++	2	1044.03	RELEELNVPGEIVESLSSS	119621616
sp|P02666|CASB_BOVIN"	KIEKFQSEEQQQTEDEL	703.6709+++	3	703.671	KIEKFQSEEQQQTEDEL	358444128
sp|P02666|CASB_BOVIN"	LSLSQSKVLPVPQKAVPYPQ	727.0877+++	3	727.088	LSLSQSKVLPVPQKAVPYPQ	243905648
sp|P02666|CASB_BOVIN"	VVPPFLQPEVMGVSKVKE	661.7043+++	3	661.704	VVPPFLQPEVMGVSKVKE	131371840
sp|P02666|CASB_BOVIN"	RELEELNVPGEIVESLSSSEES	1256.5705++ 1256.5705++ 838.0495+++	2 2 3	1256.570546 1256.570546 838.049456	RELEELNVPGEIVESLS[+80]SSEES RELEELNVPGEIVES[+80]LSSSEES	182976520
sp|P02666|CASB_BOVIN"	EESITRINK	545.2986++ 363.8681+++	2 3	545.29857 363.868139	EESITRINK	2277211584
sp|P02666|CASB_BOVIN"	RELEELNVPGEIVESLSSSEESITRINKK	1175.8769+++	3	1175.88	RELEELNVPGEIVESLS[+80]S[+80]S[+80]EESITRINKK	558034688
sp|P02666|CASB_BOVIN"	RELEELNVPGEIVESLSSSEESITRINKK	1175.8769+++	3	1175.88	RELEELNVPGEIVES[+80]LS[+80]S[+80]SEESITRINKK	558034688
sp|P02666|CASB_BOVIN"	TDVENLHLPLP	624.3352++	2	624.335	TDVENLHLPLP	64245464
sp|P02666|CASB_BOVIN"	EPVLGPVRGPFPI	689.3981++	2	689.398	EPVLGPVRGPFPI	32250012
sp|P02666|CASB_BOVIN"	VKEAMAPKHK	385.5499+++	3	385.55	VKEAM[+16]APKHK	233768688
sp|P02666|CASB_BOVIN"	KIEKFQSEEQQQTEDELQDKIH	937.4342+++ 703.3275++++	3 4	937.434192 703.327463	KIEKFQS[+80]EEQQQTEDELQDKIH	1027357504
sp|P02666|CASB_BOVIN"	RELEELNVPGEIV	748.9014++	2	748.901	RELEELNVPGEIV	512258112
sp|P02666|CASB_BOVIN"	VLPVPQKAVPYPQRDMPIQ	726.0698+++	3	726.07	VLPVPQKAVPYPQRDMPIQ	1020639808
sp|P02666|CASB_BOVIN"	MHQPHQPLPPTVMFPPQSVLSLSQS	928.4718+++	3	928.472	MHQPHQPLPPTVMFPPQSVLSLSQS	37699372
sp|P02666|CASB_BOVIN"	PVEPFTESQSLTLTD	832.4067++	2	832.407	PVEPFTESQSLTLTD	324506272
sp|P02666|CASB_BOVIN"	AVPYPQRDMPIQAF	824.9112++	2	824.911	AVPYPQRDM[+16]PIQAF	632733440
sp|P02666|CASB_BOVIN"	SQSKVLPVPQKAVPYPQRDMPIQAF	710.8836++++	4	710.884	SQSKVLPVPQKAVPYPQRDM[+16]PIQAF	381068032
sp|P02666|CASB_BOVIN"	IEKFQSEEQQQTEDELQ	1054.9846++	2	1054.98	IEKFQSEEQQQTEDELQ	119336528
sp|P02666|CASB_BOVIN"	KIEKFQSEEQQQTEDELQDKIHPFA	1015.8315+++ 762.1255++++	3 4	1015.831513 762.125453	KIEKFQSEEQQQTEDELQDKIHPFA	490139072
sp|P02666|CASB_BOVIN"	KIEKFQSEEQQQTEDELQDKIHPF	992.1525+++ 744.3662++++	3 4	992.152475 744.366175	KIEKFQSEEQQQTEDELQDKIHPF	2954411904
sp|P02666|CASB_BOVIN"	PVVVPPFL	434.2706++	2	434.271	PVVVPPFL	88743920
sp|P02666|CASB_BOVIN"	IEKFQSEEQQQTEDE	974.3964++	2	974.396	IEKFQS[+80]EEQQQTEDE	2700641536
sp|P02666|CASB_BOVIN"	IEKFQSEEQQQTEDELQDKIHPFAQTQ	1118.8436+++ 839.3845++++	3 4	1118.84358 839.384504	IEKFQS[+80]EEQQQTEDELQDKIHPFAQTQ	895919104
sp|P02666|CASB_BOVIN"	KKIEKFQSEEQQQTEDELQDK	870.0961+++ 652.8239++++	3 4	870.096078 652.823877	KKIEKFQSEEQQQTEDELQDK	344393024
sp|P02666|CASB_BOVIN"	KKIEKFQSE	608.8023++	2	608.802	KKIEKFQS[+80]E	92937544
sp|P02666|CASB_BOVIN"	IEKFQSEEQQQ	737.3165++	2	737.317	IEKFQS[+80]EEQQQ	134193440
sp|P02666|CASB_BOVIN"	KFQSEEQQQTED	748.8286++	2	748.829	KFQSEEQQQTED	87472448
sp|P02666|CASB_BOVIN"	RELEELNVPGEIVESLSSSEESITRINKKIEKFQSEEQQQT	1231.0902++++	4	1231.09	RELEELNVPGEIVES[+80]LS[+80]SSEESITRINKKIEKFQSEEQQQT	9695786
sp|P02666|CASB_BOVIN"	KEMPFPKYPVEPFTESQSL	757.3732+++	3	757.373	KEM[+16]PFPKYPVEPFTESQSL	86882696
sp|P02666|CASB_BOVIN"	VMGVSKVKEAMAPK	492.2755+++ 369.4585++++	3 4	492.275523 369.458461	VMGVSKVKEAMAPK	2189497760
sp|P02666|CASB_BOVIN"	EPVLGPVRGPFPII	745.9401++	2	745.94	EPVLGPVRGPFPII	183386880
sp|P02666|CASB_BOVIN"	SLSQSKVLPVPQKAVPYPQRDMPIQ	941.5126+++ 706.3863++++	3 4	941.512621 706.386285	SLSQSKVLPVPQKAVPYPQRDM[+16]PIQ	508174272
sp|P02666|CASB_BOVIN"	SEESITRINK	628.7977++ 419.5343+++	2 3	628.797749 419.534258	S[+80]EESITRINK	2993683760
sp|P02666|CASB_BOVIN"	KVKEAMAPK	501.2942++	2	501.294	KVKEAMAPK	98542376
sp|P02666|CASB_BOVIN"	DKIHPFAQTQSL	692.8646++ 462.2455+++	2 3	692.864608 462.245497	DKIHPFAQTQSL	865923136
sp|P02666|CASB_BOVIN"	EEQQQTEDELQDK	810.3552++	2	810.355	EEQQQTEDELQDK	185339968
sp|P02666|CASB_BOVIN"	HKEMPFPKY	596.7946++ 398.1988+++	2 3	596.794609 398.198831	HKEM[+16]PFPKY	834936704
sp|P02666|CASB_BOVIN"	VYPFPGPIPNSL	650.8504++	2	650.85	VYPFPGPIPNSL	142133456
sp|P02666|CASB_BOVIN"	RELEELNVPGEIVESLSSSEESITRIN	1595.2336++ 1063.8248+++	2 3	1595.233634 1063.824848	RELEELNVPGEIVESLS[+80]S[+80]SEESITRIN	7541639040
sp|P02666|CASB_BOVIN"	KAVPYPQRDMPIQAF	888.9587++	2	888.959	KAVPYPQRDM[+16]PIQAF	197728800
sp|P02666|CASB_BOVIN"	KIEKFQSEEQQQTEDELQDKIHPFAQT	1118.8557+++ 839.3936++++	3 4	1118.855708 839.3936	KIEKFQS[+80]EEQQQTEDELQDKIHPFAQT	1016942640
sp|P02666|CASB_BOVIN"	KFQSEEQQQTED	788.8118++	2	788.812	KFQS[+80]EEQQQTED	114412408
sp|P02666|CASB_BOVIN"	EESITRINKK	609.3461++ 406.5665+++	2 3	609.346051 406.56646	EESITRINKK	241164846
sp|P02666|CASB_BOVIN"	AVPYPQRDMPIQAFL	873.4558++	2	873.456	AVPYPQRDMPIQAFL	66140896
sp|P02666|CASB_BOVIN"	PEVMGVSKVKEAMAPK	433.9798++++	4	433.98	PEVM[+16]GVSKVKEAM[+16]APK	85804296
sp|P02666|CASB_BOVIN"	SLSQSKVLPVPQKAVPYPQRDMPIQAF	1014.2145+++ 760.9127++++	3 4	1014.214464 760.912667	SLSQSKVLPVPQKAVPYPQRDM[+16]PIQAF	2753375744
sp|P02666|CASB_BOVIN"	SLSQSKVLPVPQKAVPYPQRDMPIQ	936.1810+++	3	936.181	SLSQSKVLPVPQKAVPYPQRDMPIQ	252794016
sp|P02666|CASB_BOVIN"	VLPVPQKAVPYPQ	718.4190++	2	718.419	VLPVPQKAVPYPQ	369518592
sp|P02666|CASB_BOVIN"	MPFPKYPVEPFTESQS	942.4478++	2	942.448	MPFPKYPVEPFTESQS	310332032
sp|P02666|CASB_BOVIN"	RELEELNVPGEIVESLSSSEESITRIN	1595.2336++ 1063.8248+++ 798.1205++++	2 3 4	1595.233634 1063.824848 798.120455	RELEELNVPGEIVES[+80]LS[+80]SSEESITRIN	7746715152
sp|P02666|CASB_BOVIN"	KIHPFAQ	420.7400++	2	420.74	KIHPFAQ	326288768
sp|P02666|CASB_BOVIN"	RELEELNVPGEIVESLSSSEESIT	909.4267+++	3	909.427	RELEELNVPGEIVESLS[+80]SSEESIT	49515896
sp|P02666|CASB_BOVIN"	GVSKVKEAMAPKH	699.3821++ 466.5905+++ 350.1947++++	2 3 4	699.382111 466.590499 350.194694	GVSKVKEAM[+16]APKH	2288635448
sp|P02666|CASB_BOVIN"	FQSEEQQQTEDELQDKIHPFAQTQS	1024.4470+++	3	1024.45	FQS[+80]EEQQQTEDELQDKIHPFAQTQS	128468992
sp|P02666|CASB_BOVIN"	SEESITRIN	524.7671++	2	524.767	SEESITRIN	265313136
sp|P02666|CASB_BOVIN"	VLSLSQSKVLPVPQKAVPYPQRDMPIQAF	813.9508++++	4	813.951	VLSLSQSKVLPVPQKAVPYPQRDM[+16]PIQAF	69798400
sp|P02666|CASB_BOVIN"	DKIHPFAQTQS	636.3226++	2	636.323	DKIHPFAQTQS	699972544
sp|P02666|CASB_BOVIN"	HKEMPFPKYPVEPFTESQS	765.3648+++ 574.2754++++	3 4	765.364783 574.275406	HKEM[+16]PFPKYPVEPFTESQS	1601700384
sp|P02666|CASB_BOVIN"	HKEMPFPKYPVEPFTESQSLTLTDVE	763.1270++++	4	763.127	HKEMPFPKYPVEPFTESQSLTLTDVE	45082588
sp|P02666|CASB_BOVIN"	ESITRINKK	544.8248++ 363.5523+++	2 3	544.824755 363.552262	ESITRINKK	354467196
sp|P02666|CASB_BOVIN"	VSKVKEAMAPKHK	490.2817+++ 367.9631++++	3 4	490.281666 367.963068	VSKVKEAM[+16]APKHK	104357590
sp|P02666|CASB_BOVIN"	MHQPHQPLPPTVMFPPQSVL	771.7221+++	3	771.722	M[+16]HQPHQPLPPTVM[+16]FPPQSVL	268045920
sp|P02666|CASB_BOVIN"	SSSEESITRINK	715.8298++	2	715.83	SSS[+80]EESITRINK	148840464
sp|P02666|CASB_BOVIN"	RELEELNVPGEIVESLSSSEESITRINKKIEK	934.7318++++	4	934.732	RELEELNVPGEIVES[+80]LSSSEESITRINKKIEK	33740816
sp|P02666|CASB_BOVIN"	KIEKFQSE	504.7717++	2	504.772	KIEKFQSE	1549872512
sp|P02666|CASB_BOVIN"	HKEMPFPKYPVEPF	582.6288+++	3	582.629	HKEMPFPKYPVEPF	740189696
sp|P02666|CASB_BOVIN"	DELQDKIHPFAQTQSL	623.9829+++	3	623.983	DELQDKIHPFAQTQSL	124633200
sp|P02666|CASB_BOVIN"	RELEELNVPGEIVESLSSSEESITR	1441.6870++ 961.4604+++	2 3	1441.686973 961.460407	RELEELNVPGEIVES[+80]LSSSEESITR	2206949504
sp|P02666|CASB_BOVIN"	LEELNVPGEIVES	714.3668++	2	714.367	LEELNVPGEIVES	199774944
sp|P02666|CASB_BOVIN"	LHLPLPLLQ	522.3342++	2	522.334	LHLPLPLLQ	187949184
sp|P02666|CASB_BOVIN"	VKEAMAPKHK	380.2182+++	3	380.218	VKEAMAPKHK	334976672
sp|P02666|CASB_BOVIN"	EAMAPKHKEMPFPKYPVEPFTESQSL	755.3740++++	4	755.374	EAMAPKHKEMPFPKYPVEPFTESQSL	102812976
sp|P02666|CASB_BOVIN"	KKIEKFQSEEQQQTEDELQDK	896.7515+++ 672.8155++++	3 4	896.751521 672.81546	KKIEKFQS[+80]EEQQQTEDELQDK	285660288
sp|P02666|CASB_BOVIN"	KVKEAMAPKHK	422.9165+++	3	422.917	KVKEAMAPKHK	48133604
sp|P02666|CASB_BOVIN"	RELEELNVPGEIVESLSSSEESITRINKK	1149.2215+++	3	1149.22	RELEELNVPGEIVESLS[+80]S[+80]SEESITRINKK	78471632
sp|P02666|CASB_BOVIN"	IEKFQSEEQQQTEDELQDKIHPFAQTQS	1147.8543+++	3	1147.85	IEKFQS[+80]EEQQQTEDELQDKIHPFAQTQS	343712832
sp|P02666|CASB_BOVIN"	MAPKHKEMPFPK	486.2528+++	3	486.253	MAPKHKEM[+16]PFPK	85154696
sp|P02666|CASB_BOVIN"	MAPKHKEMPFPK	360.9427++++	4	360.943	MAPKHKEMPFPK	338601696
sp|P02666|CASB_BOVIN"	GVSKVKEAMAP	566.8052++	2	566.805	GVSKVKEAM[+16]AP	438796768
sp|P02666|CASB_BOVIN"	FQSEEQQQTE	627.2677++	2	627.268	FQSEEQQQTE	21930082
sp|P02666|CASB_BOVIN"	KAVPYPQ	401.7265++	2	401.727	KAVPYPQ	213034304
sp|P02666|CASB_BOVIN"	RELEELNVPGE	642.8251++	2	642.825	RELEELNVPGE	201524272
sp|P02666|CASB_BOVIN"	VSKVKEAMAPKHK	484.9500+++ 363.9643++++	3 4	484.950027 363.96434	VSKVKEAMAPKHK	671467328
sp|P02666|CASB_BOVIN"	FQSEEQQQTEDELQDKIHPFAQTQSL	1062.1417+++	3	1062.14	FQS[+80]EEQQQTEDELQDKIHPFAQTQSL	91905504
sp|P02666|CASB_BOVIN"	MPIQAFL	410.2253++	2	410.225	MPIQAFL	626852352
sp|P02666|CASB_BOVIN"	SSEESITRINK	672.3138++	2	672.314	S[+80]SEESITRINK	258173792
sp|P02666|CASB_BOVIN"	SEESITRIN	564.7503++	2	564.75	S[+80]EESITRIN	424617280
sp|P02666|CASB_BOVIN"	RELEELNVPGEIVESLSS	1080.4791++ 1080.4791++	2 2	1080.47909 1080.47909	RELEELNVPGEIVESLS[+80]S[+80] RELEELNVPGEIVES[+80]LS[+80]S	93200160
sp|P02666|CASB_BOVIN"	TEDELQDKIHPFAQTQSL	700.6796+++	3	700.68	TEDELQDKIHPFAQTQSL	168969456
sp|P02666|CASB_BOVIN"	IEKFQSEEQQQTEDELQDK	1176.5455++ 784.6994+++	2 3	1176.545516 784.699436	IEKFQSEEQQQTEDELQDK	3733704768
sp|P02666|CASB_BOVIN"	KIEKFQSEEQQQTEDELQDKIHP	943.1297+++ 707.5991++++	3 4	943.12967 707.599072	KIEKFQSEEQQQTEDELQDKIHP	1253018144
sp|P02666|CASB_BOVIN"	KAVPYPQRDMPIQ	514.9414+++	3	514.941	KAVPYPQRDMPIQ	194504304
sp|P02666|CASB_BOVIN"	KKIEKFQSEEQQQT	915.9353++	2	915.935	KKIEKFQS[+80]EEQQQT	22815536
sp|P02666|CASB_BOVIN"	SKVKEAMAPKH	414.5605+++	3	414.561	SKVKEAM[+16]APKH	178599888
sp|P02666|CASB_BOVIN"	KIEKFQSEEQQQTEDELQDKIHP	969.7851+++	3	969.785	KIEKFQS[+80]EEQQQTEDELQDKIHP	151749744
sp|P02666|CASB_BOVIN"	MPFPKYPVEPFTESQ	898.9318++	2	898.932	MPFPKYPVEPFTESQ	105077848
sp|P02666|CASB_BOVIN"	VKEAMAPKHKEMPFPK	623.3356+++ 467.7535++++	3 4	623.335553 467.753484	VKEAMAPKHKEMPFPK	700246768
sp|P02666|CASB_BOVIN"	FQSEEQQQTEDELQDKIHPF	852.7024+++	3	852.702	FQS[+80]EEQQQTEDELQDKIHPF	104588408
sp|P02666|CASB_BOVIN"	VLPVPQKAVPYPQRDMPIQA	755.0804+++	3	755.08	VLPVPQKAVPYPQRDM[+16]PIQA	192650048
sp|P02666|CASB_BOVIN"	SLSQSKVLPVPQKAVPYPQRDMPIQAFL	1051.9092+++ 789.1837++++	3 4	1051.909152 789.183683	SLSQSKVLPVPQKAVPYPQRDM[+16]PIQAFL	73769712
sp|P02666|CASB_BOVIN"	KVKEAMAPKH	380.2182+++	3	380.218	KVKEAMAPKH	248456384
sp|P02666|CASB_BOVIN"	TPVVVPPFL	484.7944++	2	484.794	TPVVVPPFL	96281928
sp|P02666|CASB_BOVIN"	NVPGEIVESLSSSEESITR	1017.0053++ 678.3393+++	2 3	1017.005298 678.339291	NVPGEIVESLSSSEESITR	73263700
sp|P02666|CASB_BOVIN"	EMPFPKYPVEPFTESQSL	1063.5112++	2	1063.51	EMPFPKYPVEPFTESQSL	105386176
sp|P02666|CASB_BOVIN"	VPPFLQPEVM	578.8072++	2	578.807	VPPFLQPEVM	26509030
sp|P02666|CASB_BOVIN"	LSLSQSKVLPVPQKAVPYPQRD	613.3496++++	4	613.35	LSLSQSKVLPVPQKAVPYPQRD	454956256
sp|P02666|CASB_BOVIN"	HKEMPFPKYPVEPFTESQSLTL	652.0806++++	4	652.081	HKEMPFPKYPVEPFTESQSLTL	42140084
sp|P02666|CASB_BOVIN"	SLSQSKVLPVPQKAVPYPQRDMPIQA	720.1468++++	4	720.147	SLSQSKVLPVPQKAVPYPQRDMPIQA	272412544
sp|P02666|CASB_BOVIN"	RINKKIEKFQSEEQQ	662.3332+++	3	662.333	RINKKIEKFQS[+80]EEQQ	118661872
sp|P02666|CASB_BOVIN"	ESITRINKKIEK	486.9595+++ 365.4714++++	3 4	486.959469 365.47142	ESITRINKKIEK	220905880
sp|P02666|CASB_BOVIN"	EVMGVSKVKEAMAPKHK	476.0050++++	4	476.005	EVM[+16]GVSKVKEAM[+16]APKHK	31270968
sp|P02666|CASB_BOVIN"	RELEELNVPGEIVESLS	1036.9631++ 691.6445+++	2 3	1036.963076 691.644476	RELEELNVPGEIVES[+80]LS[+80]	653389960
sp|P02666|CASB_BOVIN"	VPYPQRD	437.7245++	2	437.725	VPYPQRD	255261008
sp|P02666|CASB_BOVIN"	LLYQEPVLGPV	614.3528++	2	614.353	LLYQEPVLGPV	30484436
sp|P02666|CASB_BOVIN"	EMPFPKYPVE	618.8021++	2	618.802	EMPFPKYPVE	243127536
sp|P02666|CASB_BOVIN"	FPKYPVEPFTESQSL	884.9433++	2	884.943	FPKYPVEPFTESQSL	165382848
sp|P02666|CASB_BOVIN"	QTEDELQDK	553.2540++	2	553.254	QTEDELQDK	61560328
sp|P02666|CASB_BOVIN"	SLSQSKVLPVPQKAVPYPQR	741.4267+++	3	741.427	SLSQSKVLPVPQKAVPYPQR	138392416
sp|P02666|CASB_BOVIN"	HKEMPFPKYPVEPFTESQSLTL	656.0794++++	4	656.079	HKEM[+16]PFPKYPVEPFTESQSLTL	61223568
sp|P02666|CASB_BOVIN"	SEESITRINK	392.8788+++	3	392.879	SEESITRINK	224186880
sp|P02666|CASB_BOVIN"	IHPFAQTQSLVYPFPGPIPN	1112.0835++ 741.7248+++	2 3	1112.083489 741.724751	IHPFAQTQSLVYPFPGPIPN	140358264
sp|P02666|CASB_BOVIN"	KAVPYPQRDMPIQAF	587.6433+++	3	587.643	KAVPYPQRDMPIQAF	1419688192
sp|P02666|CASB_BOVIN"	RELEELNVPGEIVESLSSSEESITRIN	1555.2505++ 1037.1694+++ 778.1289++++	2 3 4	1555.250468 1037.169404 778.128872	RELEELNVPGEIVES[+80]LSSSEESITRIN	483459052
sp|P02666|CASB_BOVIN"	IEKFQSEEQQQTEDELQDKIHPF	976.1096+++ 732.3340++++	3 4	976.109597 732.334017	IEKFQS[+80]EEQQQTEDELQDKIHPF	607439176
sp|P02666|CASB_BOVIN"	NKKIEKFQSEEQQQTEDELQDK	908.1104+++ 681.3346++++	3 4	908.110387 681.334609	NKKIEKFQSEEQQQTEDELQDK	452337792
sp|P02666|CASB_BOVIN"	AVPYPQRDMPIQ	707.8610++	2	707.861	AVPYPQRDMPIQ	2812487680
sp|P02666|CASB_BOVIN"	EMPFPKYPVEPFTESQ	963.4531++	2	963.453	EMPFPKYPVEPFTESQ	112646448
sp|P02666|CASB_BOVIN"	RINKKIEKFQSEEQQQTED	820.0585+++	3	820.059	RINKKIEKFQS[+80]EEQQQTED	170643840
sp|P02666|CASB_BOVIN"	EVMGVSKVKEAMAPK	535.2897+++	3	535.29	EVMGVSKVKEAMAPK	55512108
sp|P02666|CASB_BOVIN"	EELNVPGEIVESLSSSEES	1017.4735++	2	1017.47	EELNVPGEIVESLSSSEES	17638952
sp|P02666|CASB_BOVIN"	PEVMGVSKVKEAMAPK	429.9810++++ 429.9810++++	4 4	429.981029 429.981029	PEVMGVSKVKEAM[+16]APK PEVM[+16]GVSKVKEAMAPK	240132832
sp|P02666|CASB_BOVIN"	SEEQQQTEDELQDK	893.8544++	2	893.854	S[+80]EEQQQTEDELQDK	68314576
sp|P02666|CASB_BOVIN"	LSLSQSKVLPVPQKAVPYPQRDMPIQ	730.6586++++	4	730.659	LSLSQSKVLPVPQKAVPYPQRDMPIQ	85171608
sp|P02666|CASB_BOVIN"	KIEKFQSEEQQQTEDELQDKIHPFAQ	1085.1731+++	3	1085.17	KIEKFQS[+80]EEQQQTEDELQDKIHPFAQ	206016224
sp|P02666|CASB_BOVIN"	SSEESITRINKK	517.8987+++	3	517.899	S[+80]S[+80]EESITRINKK	94041272
sp|P02666|CASB_BOVIN"	IEKFQSEEQQQTEDE	934.4132++	2	934.413	IEKFQSEEQQQTEDE	77128456
sp|P02666|CASB_BOVIN"	LQDKIHPFAQTQSL	542.6264+++	3	542.626	LQDKIHPFAQTQSL	235331296
sp|P02666|CASB_BOVIN"	HKEMPFPKYPVEPFTESQSLTLTD	710.0980++++	4	710.098	HKEM[+16]PFPKYPVEPFTESQSLTLTD	487328768
sp|P02666|CASB_BOVIN"	MHQPHQPLPPTVMFPPQSV	723.3642+++	3	723.364	MHQPHQPLPPTVMFPPQSV	140347552
sp|P02666|CASB_BOVIN"	RELEELNVPGEIVESLSSSEESITR	1521.6533++ 1014.7713+++	2 3	1521.653304 1014.771294	RELEELNVPGEIVESLS[+80]S[+80]S[+80]EESITR	525599258
sp|P02666|CASB_BOVIN"	RELEELNVPGEIVESLSSSEESITR	1521.6533++ 1014.7713+++	2 3	1521.653304 1014.771294	RELEELNVPGEIVES[+80]LS[+80]S[+80]SEESITR	525599258
sp|P02666|CASB_BOVIN"	EELNVPGE	443.7113++	2	443.711	EELNVPGE	56800812
sp|P02666|CASB_BOVIN"	FPKYPVEPFTESQS	828.4012++	2	828.401	FPKYPVEPFTESQS	105070720
sp|P02666|CASB_BOVIN"	LLYQEPVLGPVRGPFPI	632.3645+++	3	632.364	LLYQEPVLGPVRGPFPI	14516437
sp|P02666|CASB_BOVIN"	SKVLPVPQKAVPYPQRD	641.3668+++	3	641.367	SKVLPVPQKAVPYPQRD	38117772
sp|P02666|CASB_BOVIN"	KKIEKFQSEE	673.3236++	2	673.324	KKIEKFQS[+80]EE	127636384
sp|P02666|CASB_BOVIN"	FQSEEQQQTEDELQDK	1031.4179++	2	1031.42	FQS[+80]EEQQQTEDELQDK	288565088
sp|P02666|CASB_BOVIN"	INKKIEKFQSEEQQQ	652.9857+++	3	652.986	INKKIEKFQS[+80]EEQQQ	82646560
sp|P02666|CASB_BOVIN"	IEKFQSEEQQQT	787.8403++	2	787.84	IEKFQS[+80]EEQQQT	87424416
sp|P02666|CASB_BOVIN"	TQTPVVVPPFLQPEVM	899.4764++	2	899.476	TQTPVVVPPFLQPEVM[+16]	16825946
sp|P02666|CASB_BOVIN"	LTDVENLHLPLP	680.8772++	2	680.877	LTDVENLHLPLP	37002064
sp|P02666|CASB_BOVIN"	SQSKVLPVPQKAVPYPQRDMP	596.0716++++	4	596.072	SQSKVLPVPQKAVPYPQRDM[+16]P	32249182
sp|P02666|CASB_BOVIN"	SQSKVLPVPQK	605.8613++	2	605.861	SQSKVLPVPQK	184984048
sp|P02666|CASB_BOVIN"	RELEELNVPGEIVESLSSSE	1108.5501++	2	1108.55	RELEELNVPGEIVESLSSSE	133181248
sp|P02666|CASB_BOVIN"	EVMGVSKVKEAMAPK	540.6214+++	3	540.621	EVMGVSKVKEAM[+16]APK	106242312
sp|P02666|CASB_BOVIN"	PPQSVLSLSQSKVLPVPQK	678.0649+++	3	678.065	PPQSVLSLSQSKVLPVPQK	38956588
sp|P02666|CASB_BOVIN"	GVSKVKEAM	474.7628++	2	474.763	GVSKVKEAM	31378876
sp|P02666|CASB_BOVIN"	IEKFQSEEQQ	633.3040++	2	633.304	IEKFQSEEQQ	182210784
sp|P02666|CASB_BOVIN"	PVEPFTESQSLTLTDVENL	1060.0257++ 707.0196+++	2 3	1060.025699 707.019558	PVEPFTESQSLTLTDVENL	44336006
sp|P02666|CASB_BOVIN"	RELEELNVPGEIVESLSSSEESITRINKKIEK	1299.2841+++ 974.7149++++	3 4	1299.28414 974.714924	RELEELNVPGEIVES[+80]LS[+80]S[+80]SEESITRINKKIEK	434322700
sp|P02666|CASB_BOVIN"	TDVENLHLPLPLLQS	844.9645++	2	844.965	TDVENLHLPLPLLQS	17890998
sp|P02666|CASB_BOVIN"	IEKFQSEEQQQTEDELQDKIHPF	949.4542+++	3	949.454	IEKFQSEEQQQTEDELQDKIHPF	165737856
sp|P02666|CASB_BOVIN"	VMGVSKVKEAMAPKH	543.2935+++ 543.2935+++ 407.7219++++	3 3 4	543.293466 543.293466 407.721918	VMGVSKVKEAM[+16]APKH VM[+16]GVSKVKEAMAPKH	3208859808
sp|P02666|CASB_BOVIN"	EKFQSEEQQQTED	813.3499++	2	813.35	EKFQSEEQQQTED	43888984
sp|P02666|CASB_BOVIN"	IEKFQSEEQQQTEDELQDKIHPFAQT	1076.1574+++ 807.3699++++	3 4	1076.157387 807.369859	IEKFQS[+80]EEQQQTEDELQDKIHPFAQT	76693046
sp|P02666|CASB_BOVIN"	MPFPKYPVEPFTESQS	950.4453++	2	950.445	M[+16]PFPKYPVEPFTESQS	284237600
sp|P02666|CASB_BOVIN"	MPFPKYPVEPFTE	791.3865++	2	791.387	MPFPKYPVEPFTE	61088700
sp|P02666|CASB_BOVIN"	KKIEKFQSEEQQQTEDE	735.3300+++	3	735.33	KKIEKFQS[+80]EEQQQTEDE	19762016
sp|P02666|CASB_BOVIN"	RELEELNVPGEIVESLSSSEESITRINKK	822.1848++++	4	822.185	RELEELNVPGEIVESLSSSEESITRINKK	51579676
sp|P02666|CASB_BOVIN"	AVPYPQRDMPIQ	715.8585++	2	715.858	AVPYPQRDM[+16]PIQ	109215696
sp|P02666|CASB_BOVIN"	EAMAPKHKEMPFPK	558.2777+++	3	558.278	EAM[+16]APKHKEM[+16]PFPK	29480524
sp|P02666|CASB_BOVIN"	SKVKEAMAPK	552.8077++ 368.8742+++	2 3	552.807716 368.874236	SKVKEAM[+16]APK	139788324
sp|P02666|CASB_BOVIN"	MGVSKVKEAMAPK	469.9160+++	3	469.916	M[+16]GVSKVKEAM[+16]APK	15785706
sp|P02666|CASB_BOVIN"	RELEELNVPGEIVESLSS	1040.4959++	2	1040.5	RELEELNVPGEIVESLS[+80]S	133314256
sp|P02666|CASB_BOVIN"	SKVKEAMAPKHK	457.2589+++	3	457.259	SKVKEAM[+16]APKHK	1053580
sp|P02666|CASB_BOVIN"	IEKFQSEEQQQTEDELQDKIHPFA	730.1017++++	4	730.102	IEKFQSEEQQQTEDELQDKIHPFA	137100768
sp|P02666|CASB_BOVIN"	SSSEESITRINKKIEK	617.0057+++	3	617.006	SSSEESITRINKKIEK	31264424
sp|P02666|CASB_BOVIN"	YQEPVLGPVR	579.3193++	2	579.319	YQEPVLGPVR	123862624
sp|P02666|CASB_BOVIN"	SSSEESITRINK	755.8129++	2	755.813	S[+80]S[+80]SEESITRINK	167415808
sp|P02666|CASB_BOVIN"	EELNVPGEIVESLSSSEESITRIN	904.4268+++ 904.4268+++	3 3	904.426815 904.426815	EELNVPGEIVESLSS[+80]SEESITRIN EELNVPGEIVESLS[+80]SSEESITRIN	24822828
sp|P02666|CASB_BOVIN"	TEDELQDKIHPFAQTQ	633.9743+++	3	633.974	TEDELQDKIHPFAQTQ	63297472
sp|P02666|CASB_BOVIN"	INKKIEKFQSEE	786.8871++	2	786.887	INKKIEKFQS[+80]EE	30788228
sp|P02666|CASB_BOVIN"	NKKIEKFQSEEQQQTEDELQDK	934.7658+++	3	934.766	NKKIEKFQS[+80]EEQQQTEDELQDK	164526976
sp|P02666|CASB_BOVIN"	RELEELNVPGEIVESLSSSEESITRINKKIEKFQSEEQ	1121.8075++++	4	1121.81	RELEELNVPGEIVESLSSSEESITRINKKIEKFQS[+80]EEQ	124929256
sp|P02668|CASK_BOVIN"	SPEVIESPPEINTVQVTST	1053.9958++ 702.9996+++	2 3	1053.995757 702.999597	S[+80]PEVIESPPEINTVQVTST	23066840064
sp|P02668|CASK_BOVIN"	SPEVIESPPEINTVQVT	959.9559++	2	959.956	S[+80]PEVIESPPEINTVQVT	2040300032
sp|P02668|CASK_BOVIN"	SPEVIESPPEINTVQVTSTAV	759.7014+++	3	759.701	SPEVIESPPEINTVQVT[+80]STAV	17884803072
sp|P02668|CASK_BOVIN"	ERFFSDKIA	556.7904++	2	556.79	ERFFSDKIA	3926086144
sp|P02668|CASK_BOVIN"	SPEVIESPPEINTVQVTSTAV	1099.0654++ 733.0460+++	2 3	1099.065356 733.045996	SPEVIESPPEINTVQVTSTAV	20071903232
sp|P02668|CASK_BOVIN"	ERFFSDK	464.7298++	2	464.73	ERFFSDK	1577170176
sp|P02668|CASK_BOVIN"	SNTVPAKSCQAQPTTM	832.3925++	2	832.393	SNTVPAKSCQAQPTTM	3745012736
sp|P02668|CASK_BOVIN"	SPEVIESPPEINTVQVTSTAV	1139.0485++ 759.7014+++	2 3	1139.048521 759.701439	S[+80]PEVIESPPEINTVQVTSTAV	35123322368
sp|P02668|CASK_BOVIN"	SNTVPAKSCQAQPTTM	840.3900++	2	840.39	SNTVPAKSCQAQPTTM[+16]	3456865280
sp|P02668|CASK_BOVIN"	SPEVIESPPEINTVQVTSTAV	786.3569+++	3	786.357	S[+80]PEVIESPPEINT[+80]VQVTSTAV	530721600
sp|P02668|CASK_BOVIN"	AIPPKKNQDKTEIPTINTIASGEPTSTPTTEAVESTVATLED	1099.5630++++	4	1099.56	AIPPKKNQDKTEIPTINTIASGEPTSTPTTEAVESTVATLED	1215522304
sp|P02668|CASK_BOVIN"	MAIPPKKNQDKTEIPTINTIASGE	1306.6836++ 871.4582+++ 653.8455++++	2 3 4	1306.683635 871.458182 653.845456	M[+16]AIPPKKNQDKTEIPTINTIASGE	3096202496
sp|P02668|CASK_BOVIN"	EVIESPPEINTVQVTSTAV	1007.0230++ 671.6844+++	2 3	1007.022959 671.684398	EVIESPPEINTVQVTSTAV	12070044800
sp|P02668|CASK_BOVIN"	MAIPPKKNQDKTEIPTINTIASGEPTSTPTTEAVESTVATLEDSPE	1230.5965++++	4	1230.6	MAIPPKKNQDKTEIPTINTIASGEPTSTPTTEAVESTVATLEDS[+80]PE	982568128
sp|P02668|CASK_BOVIN"	MAIPPKKNQDKTEIPTINTIASGEPT	937.4917+++ 703.3706++++	3 4	937.491663 703.370566	M[+16]AIPPKKNQDKTEIPTINTIASGEPT	3286135296
sp|P02668|CASK_BOVIN"	PEVIESPPEINTVQVTST	970.4966++	2	970.497	PEVIESPPEINTVQVTST	821507584
sp|P02668|CASK_BOVIN"	MAIPPKKNQDKTEIPTINTIASGEPTSTPT	799.9156++++	4	799.916	M[+16]AIPPKKNQDKTEIPTINTIASGEPTSTPT	1151568768
sp|P02668|CASK_BOVIN"	ARHPHPHLSF	400.2125+++	3	400.212	ARHPHPHLSF	5760373248
sp|P02668|CASK_BOVIN"	MAIPPKKNQD	571.3053++ 381.2060+++	2 3	571.305341 381.205986	MAIPPKKNQD	98877431808
sp|P02668|CASK_BOVIN"	ERFFSDKIAKY	702.3695++ 468.5821+++ 351.6884++++	2 3 4	702.369526 468.58211 351.688401	ERFFSDKIAKY	17103402240
sp|P02668|CASK_BOVIN"	INTVQVTSTAV	566.8141++	2	566.814	INTVQVTSTAV	2362437632
sp|P02668|CASK_BOVIN"	MAIPPKKNQDKTEIPTINTIASGE	866.1265+++ 649.8467++++	3 4	866.126544 649.846727	MAIPPKKNQDKTEIPTINTIASGE	12209027072
sp|P02668|CASK_BOVIN"	MAIPPKKNQDKTEIPTINTIASGEPTSTPTTEAVESTVATLE	1103.5664++++	4	1103.57	MAIPPKKNQDKTEIPTINTIASGEPTSTPTTEAVESTVATLE	1504238208
sp|P02668|CASK_BOVIN"	SCQAQPTTMARHPHPHLSF	537.2572++++	4	537.257	SCQAQPTTMARHPHPHLSF	86332064
sp|P02668|CASK_BOVIN"	VIESPPEINTVQVTSTAV	942.5017++ 628.6702+++	2 3	942.501663 628.670201	VIESPPEINTVQVTSTAV	3672984576
sp|P02668|CASK_BOVIN"	VLSRYPSYGLNYY	797.8986++	2	797.899	VLSRYPSYGLNYY	2528409344
sp|P02668|CASK_BOVIN"	SPEVIESPPEIN	695.8105++	2	695.811	S[+80]PEVIESPPEIN	1777569280
sp|P02668|CASK_BOVIN"	MAIPPKKNQDKTEIPTINTIASGEPTSTPTTEAVESTVATLED	1509.4284+++	3	1509.43	MAIPPKKNQDKTEIPTINTIASGEPTSTPTTEAVESTVATLED	1359278080
sp|P02668|CASK_BOVIN"	PEVIESPPEINTVQVTSTAV	1055.5493++ 704.0353+++	2 3	1055.549341 704.03532	PEVIESPPEINTVQVTSTAV	5881981184
sp|P02668|CASK_BOVIN"	MAIPPKKNQDKTEIPTINTIASGEPTSTPTTEAVESTVATL	1075.3044++++	4	1075.3	M[+16]AIPPKKNQDKTEIPTINTIASGEPTSTPTTEAVESTVATL	581892096
sp|P02668|CASK_BOVIN"	VLSRYPSYGLN	634.8353++	2	634.835	VLSRYPSYGLN	536221088
sp|P02668|CASK_BOVIN"	MAIPPKKNQDKTEIPTINTIASGEPTSTPTTEAVESTVATLED	1152.3147++++	4	1152.31	MAIPPKKNQDKTEIPTINTIASGEPTST[+80]PTTEAVESTVATLED	1571772160
sp|P02668|CASK_BOVIN"	DSPEVIESPPEINTVQVTSTAV	1196.5620++	2	1196.56	DS[+80]PEVIESPPEINTVQVTSTAV	304865440
sp|P02668|CASK_BOVIN"	TVPAKSCQAQPTTM	739.8525++	2	739.853	TVPAKSCQAQPTTM[+16]	1574733824
sp|P02668|CASK_BOVIN"	MAIPPKKNQDKTEIPTINTIASGEPTSTPTTEAVESTVATLED	1514.7600+++ 1136.3218++++	3 4	1514.760015 1136.32183	M[+16]AIPPKKNQDKTEIPTINTIASGEPTSTPTTEAVESTVATLED	25427827968
sp|P02668|CASK_BOVIN"	SGEPTSTPTTEAVESTVATLEDSPEVIESPPEINTVQVTST	1410.6780+++	3	1410.68	SGEPTSTPTTEAVESTVATLEDSPEVIESPPEINTVQVTST	84220648
sp|P02668|CASK_BOVIN"	SPPEINTVQVTSTAV	771.9041++	2	771.904	SPPEINTVQVTSTAV	6400216576
sp|P02668|CASK_BOVIN"	MAIPPKKNQDKTEIPTINTIASG	828.4440+++	3	828.444	M[+16]AIPPKKNQDKTEIPTINTIASG	1449026816
sp|P02668|CASK_BOVIN"	PPEINTVQVTSTAV	728.3881++	2	728.388	PPEINTVQVTSTAV	1138079744
sp|P02668|CASK_BOVIN"	SPEVIESPPEINTVQVTSTA	1089.5143++ 726.6786+++	2 3	1089.514314 726.678635	S[+80]PEVIESPPEINTVQVTSTA	821978464
sp|P02668|CASK_BOVIN"	ERFFSDKIAK	620.8379++ 414.2277+++	2 3	620.837862 414.227667	ERFFSDKIAK	3372412800
sp|P02668|CASK_BOVIN"	MAIPPKKNQD	579.3028++ 386.5376+++	2 3	579.302798 386.537624	M[+16]AIPPKKNQD	14731180288
sp|P02668|CASK_BOVIN"	PTSTPTTEAVESTVATLED	650.3126+++	3	650.313	PTSTPTTEAVESTVATLED	353392064
sp|P02668|CASK_BOVIN"	EVIESPPEINTVQVTST	921.9702++	2	921.97	EVIESPPEINTVQVTST	1713801984
sp|P02668|CASK_BOVIN"	TVPAKSCQAQPTTM	731.8551++	2	731.855	TVPAKSCQAQPTTM	1610339712
sp|P02668|CASK_BOVIN"	EVIESPPEIN	563.7850++	2	563.785	EVIESPPEIN	379216416
sp|P02668|CASK_BOVIN"	SPEVIESPPEINTV	795.8686++	2	795.869	S[+80]PEVIESPPEINTV	110800704
sp|P02668|CASK_BOVIN"	KTEIPTINTIASGEPTSTPTTEAVESTVATLED	1135.2332+++ 851.6767++++	3 4	1135.233188 851.67671	KTEIPTINTIASGEPTSTPTTEAVESTVATLED	2529079264
sp|P02668|CASK_BOVIN"	SPEVIESPPEINTVQVTST	1014.0126++ 676.3442+++	2 3	1014.012592 676.344153	SPEVIESPPEINTVQVTST	2749209408
sp|P02668|CASK_BOVIN"	KTEIPTINTIASGEPTSTPTTEAVESTVATLE	1096.8909+++	3	1096.89	KTEIPTINTIASGEPTSTPTTEAVESTVATLE	160857824
sp|P02668|CASK_BOVIN"	ESPPEINTVQVTSTAV	836.4254++	2	836.425	ESPPEINTVQVTSTAV	628376448
sp|P02668|CASK_BOVIN"	INNQFLPYPYYAKPAAVR	709.0458+++	3	709.046	INNQFLPYPYYAKPAAVR	184975680
sp|P02668|CASK_BOVIN"	FFSDKIAKY	373.5342+++	3	373.534	FFSDKIAKY	137803616
sp|P02668|CASK_BOVIN"	SPEVIESPPEINTVQVTSTAV	1179.0317++	2	1179.03	S[+80]PEVIESPPEINTVQVT[+80]STAV	370230880
sp|P02668|CASK_BOVIN"	INNQFLPYPYYAKPA	899.9618++	2	899.962	INNQFLPYPYYAKPA	480717376
sp|P02668|CASK_BOVIN"	SNTVPAKSCQAQPTTMARHPHPHLSF	948.4658+++ 711.6012++++	3 4	948.465788 711.60116	SNTVPAKSCQAQPTTMARHPHPHLSF	1158089168
sp|P02668|CASK_BOVIN"	MAIPPKKNQDK	423.9043+++	3	423.904	MAIPPKKNQDK	219242032
sp|P02668|CASK_BOVIN"	VLSRYPSYGLNYYQQKPVAL	1180.1259++ 787.0863+++	2 3	1180.125885 787.086349	VLSRYPSYGLNYYQQKPVAL	938802944
sp|P02668|CASK_BOVIN"	SGEPTSTPTTEAVESTVATLED	1111.5133++	2	1111.51	SGEPTSTPTTEAVESTVATLED	31203324
sp|P02668|CASK_BOVIN"	MAIPPKKNQDKTEIPTINTIASGEPTSTPTTEAVESTVATLEDSPE	1214.6037++++	4	1214.6	M[+16]AIPPKKNQDKTEIPTINTIASGEPTSTPTTEAVESTVATLEDSPE	154664000
sp|P02668|CASK_BOVIN"	MAIPPKKNQ	521.7893++	2	521.789	M[+16]AIPPKKNQ	7059264
sp|P02668|CASK_BOVIN"	MAIPPKKNQDKTEIPTINTIASGEPTS	966.5023+++ 725.1286++++	3 4	966.502339 725.128573	M[+16]AIPPKKNQDKTEIPTINTIASGEPTS	1107744832
sp|P02668|CASK_BOVIN"	IASGEPTSTPTTEAVESTVATLED	802.7184+++	3	802.718	IASGEPTSTPTTEAVESTVATLED	28913426
sp|P02668|CASK_BOVIN"	TMARHPHPHLSF	477.5752+++	3	477.575	TMARHPHPHLSF	480628736
sp|P02668|CASK_BOVIN"	INNQFLPYPYY	716.3508++	2	716.351	INNQFLPYPYY	83690104
sp|P02668|CASK_BOVIN"	MAIPPKKNQDKTEIPTINTIASG	823.1123+++	3	823.112	MAIPPKKNQDKTEIPTINTIASG	2967723264
sp|P02668|CASK_BOVIN"	RFFSDKIAKY	425.5679+++	3	425.568	RFFSDKIAKY	161086848
sp|P02668|CASK_BOVIN"	MAIPPKKNQDK	429.2359+++	3	429.236	M[+16]AIPPKKNQDK	143693792
sp|P02668|CASK_BOVIN"	AIPPKKNQD	505.7851++	2	505.785	AIPPKKNQD	71394416
sp|P02668|CASK_BOVIN"	KTEIPTINTIASGE	737.3934++	2	737.393	KTEIPTINTIASGE	1044961728
sp|P02668|CASK_BOVIN"	SPAQILQWQVLSNTVPAKSCQAQPTTM	981.8283+++	3	981.828	SPAQILQWQVLSNTVPAKSCQAQPTTM[+16]	25285004
sp|P02668|CASK_BOVIN"	IAKYIPIQYVL	660.8999++	2	660.9	IAKYIPIQYVL	10728531
sp|P02668|CASK_BOVIN"	KSCQAQPTTM	547.7521++	2	547.752	KSCQAQPTTM	162265712
sp|P02668|CASK_BOVIN"	AVRSPAQILQW	634.8591++	2	634.859	AVRSPAQILQW	167246544
sp|P02668|CASK_BOVIN"	VIESPPEIN	499.2637++	2	499.264	VIESPPEIN	543898048
sp|P02668|CASK_BOVIN"	INNQFLPYPY	634.8191++	2	634.819	INNQFLPYPY	200507968
sp|P02668|CASK_BOVIN"	VIESPPEINTVQVTST	857.4489++	2	857.449	VIESPPEINTVQVTST	236015232
sp|P02668|CASK_BOVIN"	SCQAQPTTMARHPHPHLSF	541.2559++++	4	541.256	SCQAQPTTM[+16]ARHPHPHLSF	75391808
sp|P02668|CASK_BOVIN"	SPAQILQWQVL	641.8613++	2	641.861	SPAQILQWQVL	173344704
sp|P02668|CASK_BOVIN"	NTVPAKSCQAQPTTM	796.8740++	2	796.874	NTVPAKSCQAQPTTM[+16]	111154368
sp|P02668|CASK_BOVIN"	HPHPHLSF	486.2459++	2	486.246	HPHPHLSF	595132672
sp|P02668|CASK_BOVIN"	SNTVPAKSCQAQPTTMARHPHPH	624.8050++++	4	624.805	SNTVPAKSCQAQPTTMARHPHPH	146022672
sp|P02668|CASK_BOVIN"	DERFFSDKIAKY	506.9244+++	3	506.924	DERFFSDKIAKY	114048800
sp|P02668|CASK_BOVIN"	EVIESPPEINTVQVTSTAV	1047.0061++	2	1047.01	EVIESPPEINTVQVT[+80]STAV	208708672
sp|P02668|CASK_BOVIN"	PTSTPTTEAVESTVATLEDSPEVIESPPEIN	1107.5113+++	3	1107.51	PTSTPTTEAVESTVATLEDS[+80]PEVIESPPEIN	134342384
sp|P02668|CASK_BOVIN"	SDKIAKY	412.7293++	2	412.729	SDKIAKY	46076856
sp|P02668|CASK_BOVIN"	SNTVPAKSCQAQPTTMA	875.9086++	2	875.909	SNTVPAKSCQAQPTTM[+16]A	27990508
sp|P02668|CASK_BOVIN"	SRYPSYGLNYYQQKPVAL	1074.0496++ 716.3689+++	2 3	1074.049646 716.368856	SRYPSYGLNYYQQKPVAL	901641448
sp|P02668|CASK_BOVIN"	VLSRYPSYGLNY	716.3670++	2	716.367	VLSRYPSYGLNY	66562024
sp|P02668|CASK_BOVIN"	KTEIPTINTIASGEPTSTPTTEAVESTVATLED	1161.8886+++	3	1161.89	KTEIPTINTIAS[+80]GEPTSTPTTEAVESTVATLED	103514624
sp|P02668|CASK_BOVIN"	KTEIPTINTIASGEPTSTPTTEAVESTVATLEDSPE	1266.2644+++	3	1266.26	KTEIPTINTIASGEPTSTPTTEAVESTVATLEDS[+80]PE	73096752
sp|P02668|CASK_BOVIN"	PEINTVQVTSTAV	679.8617++	2	679.862	PEINTVQVTSTAV	116072800
sp|P02668|CASK_BOVIN"	QVLSNTVPAKSCQAQPTTM	1002.4981++	2	1002.5	QVLSNTVPAKSCQAQPTTM	145807520
sp|P02668|CASK_BOVIN"	MAIPPKKNQDKTEIPTINTIASGEPT	932.1600+++	3	932.16	MAIPPKKNQDKTEIPTINTIASGEPT	126831552
sp|P02668|CASK_BOVIN"	KTEIPTINTIA	600.8454++	2	600.845	KTEIPTINTIA	125978256
sp|P02668|CASK_BOVIN"	MAIPPKKNQDKTEIPTIN	685.3699+++	3	685.37	M[+16]AIPPKKNQDKTEIPTIN	803405760
sp|P02668|CASK_BOVIN"	PPKKNQD	413.7245++	2	413.725	PPKKNQD	8755517
sp|P02668|CASK_BOVIN"	MAIPPKKNQDKTEIPTINTIASGEPTSTPTTE	1142.9151+++ 857.4382++++	3 4	1142.915137 857.438171	M[+16]AIPPKKNQDKTEIPTINTIASGEPTSTPTTE	1319125152
sp|P02668|CASK_BOVIN"	PTSTPTTEAVESTVATLEDSPEVIESPPEINTVQVTST	1346.3014+++	3	1346.3	PTSTPTTEAVESTVATLEDS[+80]PEVIESPPEINTVQVTST	15236402
sp|P02668|CASK_BOVIN"	YQQKPVAL	473.7715++	2	473.771	YQQKPVAL	108527008
sp|P02668|CASK_BOVIN"	SRYPSYGLN	528.7591++	2	528.759	SRYPSYGLN	298334080
sp|P02668|CASK_BOVIN"	INNQFLPYPYYAKPAAV	985.0145++	2	985.015	INNQFLPYPYYAKPAAV	210187808
sp|P02668|CASK_BOVIN"	SPPEINTVQVTST	686.8514++	2	686.851	SPPEINTVQVTST	1688117632
sp|P02668|CASK_BOVIN"	SNTVPAKSCQAQPTTMARHPHPH	838.0693+++ 628.8038++++	3 4	838.069257 628.803762	SNTVPAKSCQAQPTTM[+16]ARHPHPH	120429908
sp|P02668|CASK_BOVIN"	MAIPPKKNQDKTE	750.3980++ 500.6011+++ 375.7026++++	2 3 4	750.397958 500.601064 375.702617	MAIPPKKNQDKTE	195808077
sp|P02668|CASK_BOVIN"	MAIPPKKNQDKTEIPTINTIASGEPTSTPTTEA	875.1974++++	4	875.197	M[+16]AIPPKKNQDKTEIPTINTIASGEPTSTPTTEA	273287072
sp|P02668|CASK_BOVIN"	SPEVIESPPEINTVQVT	919.9727++	2	919.973	SPEVIESPPEINTVQVT	983081664
sp|P02668|CASK_BOVIN"	QVLSNTVPAKSCQAQPTTM	1010.4955++	2	1010.5	QVLSNTVPAKSCQAQPTTM[+16]	8937281536
sp|P02668|CASK_BOVIN"	MAIPPKKNQ	513.7919++	2	513.792	MAIPPKKNQ	11506674
sp|P02668|CASK_BOVIN"	SFMAIPPKKNQD	464.5711+++	3	464.571	SFM[+16]AIPPKKNQD	188392656
sp|P02668|CASK_BOVIN"	AIPPKKNQDKTEIPTINTIASGE	822.4464+++	3	822.446	AIPPKKNQDKTEIPTINTIASGE	697482048
sp|P02668|CASK_BOVIN"	MAIPPKKNQDKTEIPTINT	1070.0775++	2	1070.08	MAIPPKKNQDKTEIPTINT	148107120
sp|P02668|CASK_BOVIN"	IASGEPTSTPTTE	645.8066++	2	645.807	IASGEPTSTPTTE	224023760
sp|P02668|CASK_BOVIN"	TMARHPHPHLSF	482.9068+++	3	482.907	TM[+16]ARHPHPHLSF	495126560
sp|P02702|FOLR1_BOVIN"	PFQGNPNEEVARFYAENPTSGSTPQGI	1454.1808++ 969.7896+++	2 3	1454.180834 969.789648	PFQGNPNEEVARFYAENPTSGSTPQGI	30710881280
sp|P02702|FOLR1_BOVIN"	NPTSGSTPQGI	529.7593++	2	529.759	NPTSGSTPQGI	353464256
sp|P02702|FOLR1_BOVIN"	PFQGNPNEEVARF	752.8626++	2	752.863	PFQGNPNEEVARF	373985088
sp|P02702|FOLR1_BOVIN"	PFQGNPNEEVARFYAENPTSGSTPQ	913.0878+++	3	913.088	PFQGNPNEEVARFYAENPTSGSTPQ	168079200
sp|P02702|FOLR1_BOVIN"	VARFYAENPTSGSTPQGI	947.9683++	2	947.968	VARFYAENPTSGSTPQGI	124285776
sp|P02702|FOLR1_BOVIN"	PNEEVARFYAENPTSGSTPQGI	1182.5588++	2	1182.56	PNEEVARFYAENPTSGSTPQGI	116822352
sp|P02702|FOLR1_BOVIN"	NPNEEVARFYAENPTSGSTPQGI	1239.5802++	2	1239.58	NPNEEVARFYAENPTSGSTPQGI	57389576
sp|P02702|FOLR1_BOVIN"	PTSGSTPQGI	472.7378++	2	472.738	PTSGSTPQGI	886455040
sp|P02702|FOLR1_BOVIN"	AKHHKAEPGPED	439.2178+++	3	439.218	AKHHKAEPGPED	13668245
sp|P02702|FOLR1_BOVIN"	PFQGNPNEEVARFYAENPTSGSTPQG	932.0950+++	3	932.095	PFQGNPNEEVARFYAENPTSGSTPQG	85942496
sp|P02702|FOLR1_BOVIN"	PFQGNPNEEVARFYAENPTSG	1162.5325++ 775.3575+++	2 3	1162.532546 775.357456	PFQGNPNEEVARFYAENPTSG	273263384
sp|P02754|LACB_BOVIN"	IQKVAGTWYSLAMAASD	906.4535++	2	906.453	IQKVAGTWYSLAMAASD	990837760
sp|P02754|LACB_BOVIN"	YVEELKPTPEGD	688.8326++	2	688.833	YVEELKPTPEGD	2054876032
sp|P02754|LACB_BOVIN"	IQKVAGTWYSLAMAASD	914.4509++	2	914.451	IQKVAGTWYSLAM[+16]AASD	3663568128
sp|P02754|LACB_BOVIN"	ALEKFDKA	461.2556++	2	461.256	ALEKFDKA	393311264
sp|P02754|LACB_BOVIN"	VRTPEVDDE	530.2513++	2	530.251	VRTPEVDDE	13399688192
sp|P02754|LACB_BOVIN"	AQSAPLRVYVEELKPTPEGD	1100.0682++ 733.7146+++	2 3	1100.068233 733.71458	AQSAPLRVYVEELKPTPEGD	59178475520
sp|P02754|LACB_BOVIN"	PTQLEEQCHI	599.2821++	2	599.282	PTQLEEQCHI	193135902720
sp|P02754|LACB_BOVIN"	YVEELKPTPEGDL	745.3747++	2	745.375	YVEELKPTPEGDL	8421067776
sp|P02754|LACB_BOVIN"	EALEKFD	426.2109++	2	426.211	EALEKFD	45255417856
sp|P02754|LACB_BOVIN"	SAPLRVYVEE	581.8088++	2	581.809	SAPLRVYVEE	807303744
sp|P02754|LACB_BOVIN"	VEELKPTPEGD	607.3010++	2	607.301	VEELKPTPEGD	3764227072
sp|P02754|LACB_BOVIN"	SFNPTQLEEQCHI	773.3537++	2	773.354	SFNPTQLEEQCHI	12120429568
sp|P02754|LACB_BOVIN"	VRTPEVDD	465.7300++	2	465.73	VRTPEVDD	19232905216
sp|P02754|LACB_BOVIN"	ELKPTPEGD	493.2455++	2	493.245	ELKPTPEGD	1759180800
sp|P02754|LACB_BOVIN"	DEALEKFD	483.7244++	2	483.724	DEALEKFD	62065393664
sp|P02754|LACB_BOVIN"	DTDYKKYL	523.2637++	2	523.264	DTDYKKYL	282439424
sp|P02754|LACB_BOVIN"	ELKPTPEGDL	549.7875++	2	549.788	ELKPTPEGDL	3593101056
sp|P02754|LACB_BOVIN"	VEELKPTPEGDLE	728.3643++	2	728.364	VEELKPTPEGDLE	2999999232
sp|P02754|LACB_BOVIN"	TPEVDDEALEK	623.2959++	2	623.296	TPEVDDEALEK	1613678592
sp|P02754|LACB_BOVIN"	AQSAPLRVYVEELKPTPEG	695.3723+++	3	695.372	AQSAPLRVYVEELKPTPEG	4657629184
sp|P02754|LACB_BOVIN"	ALNENKVLVLDTD	722.3881++	2	722.388	ALNENKVLVLDTD	17448923136
sp|P02754|LACB_BOVIN"	AQSAPLRVYVEELKPT	900.9964++	2	900.996	AQSAPLRVYVEELKPT	141234336
sp|P02754|LACB_BOVIN"	NPTQLEEQCHI	656.3035++	2	656.304	NPTQLEEQCHI	19527587840
sp|P02754|LACB_BOVIN"	VEELKPTPEGDL	663.8430++	2	663.843	VEELKPTPEGDL	11517517824
sp|P02754|LACB_BOVIN"	EKFDKALKALPM	469.5953+++	3	469.595	EKFDKALKALPM[+16]	210411712
sp|P02754|LACB_BOVIN"	KTKIPAVF	452.2867++	2	452.287	KTKIPAVF	13265611776
sp|P02754|LACB_BOVIN"	EKFDKALKA	525.3031++ 350.5378+++	2 3	525.303124 350.537841	EKFDKALKA	13447496192
sp|P02754|LACB_BOVIN"	ALNENKVLVLD	614.3508++	2	614.351	ALNENKVLVLD	16633319424
sp|P02754|LACB_BOVIN"	EKTKIPAV	443.2738++	2	443.274	EKTKIPAV	1579810560
sp|P02754|LACB_BOVIN"	YVEELKPTPEGDLE	809.8960++	2	809.896	YVEELKPTPEGDLE	2097036288
sp|P02754|LACB_BOVIN"	NSAEPEQSL	487.7249++	2	487.725	NSAEPEQSL	1406191232
sp|P02754|LACB_BOVIN"	IRLSFNPTQLEEQCHI	643.3280+++	3	643.328	IRLSFNPTQLEEQCHI	266675600
sp|P02754|LACB_BOVIN"	YVEELKPTPE	602.8084++	2	602.808	YVEELKPTPE	884311488
sp|P02754|LACB_BOVIN"	YVEELKPTPEGDLEIL	922.9800++ 615.6558+++	2 3	922.980032 615.65578	YVEELKPTPEGDLEIL	2616597368
sp|P02754|LACB_BOVIN"	ISLLDAQSAPLRVYVEELKPTPEG	875.8093+++	3	875.809	ISLLDAQSAPLRVYVEELKPTPEG	115046128
sp|P02754|LACB_BOVIN"	IQKVAGTWYSLAMAA	805.4240++	2	805.424	IQKVAGTWYSLAMAA	91982176
sp|P02754|LACB_BOVIN"	KIDALNENKVLVL	490.2960+++	3	490.296	KIDALNENKVLVL	1533833088
sp|P02754|LACB_BOVIN"	TDYKKYLL	522.2922++	2	522.292	TDYKKYLL	292786816
sp|P02754|LACB_BOVIN"	VLDTDYKKYLL	685.8819++ 457.5904+++	2 3	685.881935 457.590382	VLDTDYKKYLL	2208679424
sp|P02754|LACB_BOVIN"	DTDYKKYLLF	653.3399++	2	653.34	DTDYKKYLLF	463077248
sp|P02754|LACB_BOVIN"	LIVTQTMKGLDIQKVAGTWYSLAMAA	947.8345+++	3	947.834	LIVTQTM[+16]KGLDIQKVAGTWYSLAM[+16]AA	33595072
sp|P02754|LACB_BOVIN"	VRTPEVDDEAL	622.3119++	2	622.312	VRTPEVDDEAL	2344977408
sp|P02754|LACB_BOVIN"	AQKKIIAEKTKIPAVFKID	536.0819++++	4	536.082	AQKKIIAEKTKIPAVFKID	285312672
sp|P02754|LACB_BOVIN"	FNPTQLEEQCHI	729.8377++	2	729.838	FNPTQLEEQCHI	3892341248
sp|P02754|LACB_BOVIN"	IVTQTMKGLDIQKVAGTWYSL	790.0909+++	3	790.091	IVTQTM[+16]KGLDIQKVAGTWYSL	32830692
sp|P02754|LACB_BOVIN"	EKFDKALKALPMH	509.9499+++	3	509.95	EKFDKALKALPMH	1981862400
sp|P02754|LACB_BOVIN"	LPMHIRL	440.2653++	2	440.265	LPMHIRL	3422835456
sp|P02754|LACB_BOVIN"	AQKKIIAEKTKIPAVF	595.7047+++ 447.0304++++	3 4	595.70474 447.030374	AQKKIIAEKTKIPAVF	1614260160
sp|P02754|LACB_BOVIN"	VRTPEVDDEA	565.7698++	2	565.77	VRTPEVDDEA	6608745472
sp|P02754|LACB_BOVIN"	EALEKFDKA	525.7769++	2	525.777	EALEKFDKA	444833408
sp|P02754|LACB_BOVIN"	EALEKFDKALKAL	492.6205+++	3	492.62	EALEKFDKALKAL	324792480
sp|P02754|LACB_BOVIN"	EKFDKALKALPMHIRL	637.3730+++ 478.2816++++	3 4	637.372996 478.281566	EKFDKALKALPMHIRL	5413368320
sp|P02754|LACB_BOVIN"	KALKALPMHIRLSFNPTQLEEQCHI	730.1439++++	4	730.144	KALKALPMHIRLSFNPTQLEEQCHI	112342888
sp|P02754|LACB_BOVIN"	IIAEKTKIPAVFKID	562.6782+++	3	562.678	IIAEKTKIPAVFKID	163666368
sp|P02754|LACB_BOVIN"	ALEKFD	361.6896++	2	361.69	ALEKFD	2199880448
sp|P02754|LACB_BOVIN"	ELKPTPEGDLE	614.3088++	2	614.309	ELKPTPEGDLE	1673167744
sp|P02754|LACB_BOVIN"	KTKIPAV	378.7525++	2	378.753	KTKIPAV	2936409088
sp|P02754|LACB_BOVIN"	DEALEKFDKALKA	493.2681+++	3	493.268	DEALEKFDKALKA	692692288
sp|P02754|LACB_BOVIN"	EKFDKALKALPMHIRL	642.7046+++ 482.2803++++	3 4	642.704634 482.280295	EKFDKALKALPM[+16]HIRL	3061127232
sp|P02754|LACB_BOVIN"	DEALEKFDKALKAL	398.4739++++	4	398.474	DEALEKFDKALKAL	53406440
sp|P02754|LACB_BOVIN"	DEALEKFDK	547.7719++ 365.5170+++	2 3	547.771853 365.516994	DEALEKFDK	1413384448
sp|P02754|LACB_BOVIN"	ALEKFDKALKA	617.3637++ 411.9116+++	2 3	617.363713 411.911567	ALEKFDKALKA	3614917824
sp|P02754|LACB_BOVIN"	KVAGTWYSL	512.7767++	2	512.777	KVAGTWYSL	1534738944
sp|P02754|LACB_BOVIN"	LDTDYKKYLL	636.3477++ 424.5676+++	2 3	636.347728 424.567578	LDTDYKKYLL	842009472
sp|P02754|LACB_BOVIN"	ELKPTPEGDLEIL	727.3929++	2	727.393	ELKPTPEGDLEIL	199559920
sp|P02754|LACB_BOVIN"	KFDKALKALPMHIRL	450.0196++++	4	450.02	KFDKALKALPM[+16]HIRL	253164000
sp|P02754|LACB_BOVIN"	LEKFDKALKALPMHIRL	510.5513++++	4	510.551	LEKFDKALKALPM[+16]HIRL	202152720
sp|P02754|LACB_BOVIN"	LIVTQTMKGLDIQKVAGTWYSLA	846.1330+++	3	846.133	LIVTQTMKGLDIQKVAGTWYSLA	37050688
sp|P02754|LACB_BOVIN"	TQLEEQCHI	550.7557++	2	550.756	TQLEEQCHI	5668923904
sp|P02754|LACB_BOVIN"	HIRLSFNPTQLEEQCHI	689.0143+++ 517.0125++++	3 4	689.014307 517.012549	HIRLSFNPTQLEEQCHI	244144972
sp|P02754|LACB_BOVIN"	VEELKPTPE	521.2768++	2	521.277	VEELKPTPE	6729856512
sp|P02754|LACB_BOVIN"	KALKALPMHIRL	469.6270+++ 352.4721++++	3 4	469.626996 352.472066	KALKALPM[+16]HIRL	897333280
sp|P02754|LACB_BOVIN"	DTDYKKYLL	579.8057++ 386.8729+++	2 3	579.805696 386.87289	DTDYKKYLL	5456173568
sp|P02754|LACB_BOVIN"	TPEVDDEALEKFDKALKAL	711.3756+++ 533.7835++++	3 4	711.375565 533.783493	TPEVDDEALEKFDKALKAL	106241256
sp|P02754|LACB_BOVIN"	LKALPMH	413.2362++	2	413.236	LKALPM[+16]H	198481168
sp|P02754|LACB_BOVIN"	ALEKFDKALKALPMH	576.6553+++ 432.7433++++	3 4	576.65528 432.743279	ALEKFDKALKALPM[+16]H	314449344
sp|P02754|LACB_BOVIN"	DKALKALPMHIRL	507.9693+++ 381.2288++++	3 4	507.969311 381.228802	DKALKALPM[+16]HIRL	1229751168
sp|P02754|LACB_BOVIN"	LEEQCHI	436.2026++	2	436.203	LEEQCHI	7259851264
sp|P02754|LACB_BOVIN"	LEKFDKALK	364.5535+++	3	364.553	LEKFDKALK	68642408
sp|P02754|LACB_BOVIN"	ALEKFDKALKALPMHIRL	528.3106++++	4	528.311	ALEKFDKALKALPM[+16]HIRL	240528384
sp|P02754|LACB_BOVIN"	LVRTPEVDD	522.2720++	2	522.272	LVRTPEVDD	767734912
sp|P02754|LACB_BOVIN"	EALEKFDKALKA	454.9258+++	3	454.926	EALEKFDKALKA	651007808
sp|P02754|LACB_BOVIN"	ALPMHIRL	483.7813++	2	483.781	ALPM[+16]HIRL	189991840
sp|P02754|LACB_BOVIN"	DEALEKFDKALK	703.8799++ 469.5890+++ 352.4436++++	2 3 4	703.879924 469.589041 352.4436	DEALEKFDKALK	1335101632
sp|P02754|LACB_BOVIN"	DAQSAPLRVYVEELKPTPEGD	772.0569+++	3	772.057	DAQSAPLRVYVEELKPTPEGD	199401232
sp|P02754|LACB_BOVIN"	MENSAEPEQS	561.2244++	2	561.224	MENSAEPEQS	197125920
sp|P02754|LACB_BOVIN"	LIVTQTMKGLDIQKVAGTWYSL	827.7856+++	3	827.786	LIVTQTM[+16]KGLDIQKVAGTWYSL	172999328
sp|P02754|LACB_BOVIN"	NENKVLVL	464.7767++	2	464.777	NENKVLVL	1049901632
sp|P02754|LACB_BOVIN"	GLDIQKVAGTWYSL	775.9143++	2	775.914	GLDIQKVAGTWYSL	122930304
sp|P02754|LACB_BOVIN"	IPAVFKIDAL	543.8315++	2	543.832	IPAVFKIDAL	18659760
sp|P02754|LACB_BOVIN"	LEKFDKALKALPMHIRL	675.0677+++ 506.5526++++	3 4	675.067684 506.552582	LEKFDKALKALPMHIRL	355023836
sp|P02754|LACB_BOVIN"	AQSAPLRVYVEELKPTPE	1014.0440++ 676.3651+++	2 3	1014.044029 676.365111	AQSAPLRVYVEELKPTPE	353627328
sp|P02754|LACB_BOVIN"	IDALNENK	458.7404++	2	458.74	IDALNENK	276094144
sp|P02754|LACB_BOVIN"	RLSFNPTQLEEQCHI	907.9463++ 605.6333+++	2 3	907.946335 605.633315	RLSFNPTQLEEQCHI	386165040
sp|P02754|LACB_BOVIN"	KTKIPAVFKID	630.3897++ 420.5956+++	2 3	630.389731 420.595579	KTKIPAVFKID	1277530112
sp|P02754|LACB_BOVIN"	VEELKPTPEG	549.7875++	2	549.788	VEELKPTPEG	454251744
sp|P02754|LACB_BOVIN"	LEKFDKALKA	581.8452++	2	581.845	LEKFDKALKA	503965984
sp|P02754|LACB_BOVIN"	ISLLDAQSAPLRVYVEELKPTPEGD	914.1516+++ 685.8655++++	3 4	914.151635 685.865545	ISLLDAQSAPLRVYVEELKPTPEGD	1057798924
sp|P02754|LACB_BOVIN"	KALKALPMHIRL	464.2954+++	3	464.295	KALKALPMHIRL	608986368
sp|P02754|LACB_BOVIN"	DTDYKKY	466.7216++	2	466.722	DTDYKKY	108669776
sp|P02754|LACB_BOVIN"	KFDKALKALPMHIRL	594.3588+++ 446.0209++++	3 4	594.358798 446.020917	KFDKALKALPMHIRL	618771136
sp|P02754|LACB_BOVIN"	TKIPAVFKIDAL	658.4028++	2	658.403	TKIPAVFKIDAL	76797344
sp|P02754|LACB_BOVIN"	IIAEKTKIPAVF	665.4107++	2	665.411	IIAEKTKIPAVF	241329248
sp|P02754|LACB_BOVIN"	VEELKPTPEGDLEIL	841.4484++	2	841.448	VEELKPTPEGDLEIL	515889024
sp|P02754|LACB_BOVIN"	TPEVDDEA	438.1851++	2	438.185	TPEVDDEA	354284000
sp|P02754|LACB_BOVIN"	LPMHIRL	448.2627++	2	448.263	LPM[+16]HIRL	3541347584
sp|P02754|LACB_BOVIN"	VDDEALEKFDKALKAL	451.9977++++	4	451.998	VDDEALEKFDKALKAL	13111774
sp|P02754|LACB_BOVIN"	KIDALNENKVL	628.8641++ 419.5785+++	2 3	628.864077 419.578477	KIDALNENKVL	629885280
sp|P02754|LACB_BOVIN"	IPAVFKID	451.7709++	2	451.771	IPAVFKID	450133408
sp|P02754|LACB_BOVIN"	NENKVLV	408.2347++	2	408.235	NENKVLV	151091616
sp|P02754|LACB_BOVIN"	VEELKPTPEGDLEILLQK	684.3805+++	3	684.381	VEELKPTPEGDLEILLQK	30002334
sp|P02754|LACB_BOVIN"	TKIPAVFKIDA	401.5763+++	3	401.576	TKIPAVFKIDA	78141856
sp|P02754|LACB_BOVIN"	TKIPAVFKID	566.3422++ 377.8973+++	2 3	566.342249 377.897258	TKIPAVFKID	1810620800
sp|P02754|LACB_BOVIN"	VDDEALEKFD	590.7721++	2	590.772	VDDEALEKFD	502164384
sp|P02754|LACB_BOVIN"	TPEVDDEALEKF	696.8301++	2	696.83	TPEVDDEALEKF	166298176
sp|P02754|LACB_BOVIN"	TPEVDDEALEKFDKALKA	673.6809+++	3	673.681	TPEVDDEALEKFDKALKA	99851568
sp|P02754|LACB_BOVIN"	KALPMHIRL	365.5549+++	3	365.555	KALPM[+16]HIRL	255281664
sp|P02754|LACB_BOVIN"	APLRVYVEELKPTPEGD	638.3387+++	3	638.339	APLRVYVEELKPTPEGD	106979240
sp|P02754|LACB_BOVIN"	EALEKFDKAL	388.5484+++	3	388.548	EALEKFDKAL	115337936
sp|P02754|LACB_BOVIN"	TPEVDDEALEKFDKALK	650.0018+++ 487.7532++++	3 4	650.001839 487.753198	TPEVDDEALEKFDKALK	174643840
sp|P02754|LACB_BOVIN"	AQSAPLRVYVEELK	534.9665+++	3	534.967	AQSAPLRVYVEELK	496618944
sp|P02754|LACB_BOVIN"	IQKVAGTWYSL	633.3481++	2	633.348	IQKVAGTWYSL	630312704
sp|P02754|LACB_BOVIN"	KFDKALKALPMH	466.9357+++ 350.4536++++	3 4	466.935718 350.453608	KFDKALKALPMH	220078720
sp|P02754|LACB_BOVIN"	KIDALNENKVLVLD	792.4538++ 528.6383+++	2 3	792.453787 528.638284	KIDALNENKVLVLD	622624112
sp|P02754|LACB_BOVIN"	DEALEKFDKA	583.2904++ 389.1960+++	2 3	583.29041 389.196032	DEALEKFDKA	1458402240
sp|P02754|LACB_BOVIN"	PLRVYVEE	502.7742++	2	502.774	PLRVYVEE	441636192
sp|P02754|LACB_BOVIN"	DKALKALPMHIRL	502.6377+++ 377.2301++++	3 4	502.637672 377.230073	DKALKALPMHIRL	225504128
sp|P02754|LACB_BOVIN"	LKALPMHIRL	596.3734++ 397.9180+++	2 3	596.373361 397.917999	LKALPMHIRL	993729920
sp|P02754|LACB_BOVIN"	LIVTQTMKGLDIQKVAGTWYS	784.7592+++	3	784.759	LIVTQTMKGLDIQKVAGTWYS	46230592
sp|P02754|LACB_BOVIN"	EALEKFDKALK	646.3665++ 431.2467+++	2 3	646.366452 431.246727	EALEKFDKALK	854245344
sp|P02754|LACB_BOVIN"	IIAEKTKIPAVFK	486.6412+++	3	486.641	IIAEKTKIPAVFK	80599808
sp|P02754|LACB_BOVIN"	KIDALNENKVLVLDTDYKKYLL	652.8704++++	4	652.87	KIDALNENKVLVLDTDYKKYLL	44350012
sp|P02754|LACB_BOVIN"	VYVEELKPTPEGD	738.3668++	2	738.367	VYVEELKPTPEGD	133681096
sp|P02754|LACB_BOVIN"	ALEKFDKALKALPMHIRL	524.3119++++	4	524.312	ALEKFDKALKALPMHIRL	17292016
sp|P02754|LACB_BOVIN"	ALEKFDKALKALPMH	571.3236+++	3	571.324	ALEKFDKALKALPMH	99456584
sp|P02754|LACB_BOVIN"	LIVTQTMKGLDIQKVAGTWYSLA	851.4646+++	3	851.465	LIVTQTM[+16]KGLDIQKVAGTWYSLA	66377436
sp|P02754|LACB_BOVIN"	EELKPTPEGD	557.7668++	2	557.767	EELKPTPEGD	88276960
sp|P02754|LACB_BOVIN"	KIDALNENK	522.7878++	2	522.788	KIDALNENK	93221424
sp|P02754|LACB_BOVIN"	EKFDKALKALPMH	772.4187++ 515.2816+++ 386.7130++++	2 3 4	772.418694 515.281554 386.712985	EKFDKALKALPM[+16]H	3370460936
sp|P02754|LACB_BOVIN"	KIDALNENKVLVLDTD	900.4911++ 600.6632+++	2 3	900.491098 600.663157	KIDALNENKVLVLDTD	370530520
sp|P02754|LACB_BOVIN"	DKALKALPMH	375.2146+++	3	375.215	DKALKALPMH	526398080
sp|P02754|LACB_BOVIN"	IQKVAGTWYSLAMAA	813.4214++	2	813.421	IQKVAGTWYSLAM[+16]AA	254637488
sp|P02754|LACB_BOVIN"	AQSAPLRVYVEELKPTPEGDLE	814.4235+++	3	814.423	AQSAPLRVYVEELKPTPEGDLE	219439488
sp|P02754|LACB_BOVIN"	ECAQKKIIAE	566.8052++	2	566.805	ECAQKKIIAE	20980926
sp|P02754|LACB_BOVIN"	LVRTPEVDDE	586.7933++	2	586.793	LVRTPEVDDE	297631296
sp|P02754|LACB_BOVIN"	AQSAPLRVYVEEL	737.8986++	2	737.899	AQSAPLRVYVEEL	109282432
sp|P02754|LACB_BOVIN"	ALNENKVLVLDTDY	803.9198++	2	803.92	ALNENKVLVLDTDY	121850840
sp|P02754|LACB_BOVIN"	ENKVLVLDTD	573.3061++	2	573.306	ENKVLVLDTD	272945088
sp|P02754|LACB_BOVIN"	PMHIRL	391.7207++	2	391.721	PM[+16]HIRL	797977024
sp|P02754|LACB_BOVIN"	KVLVLDTD	451.7633++	2	451.763	KVLVLDTD	183246496
sp|P02754|LACB_BOVIN"	SAPLRVYVEEL	638.3508++	2	638.351	SAPLRVYVEEL	472415200
sp|P02754|LACB_BOVIN"	IQKVAGTWYSLA	668.8666++	2	668.867	IQKVAGTWYSLA	139450096
sp|P02754|LACB_BOVIN"	KALKALP	370.7551++	2	370.755	KALKALP	181937072
sp|P02754|LACB_BOVIN"	LKALPMHIRL	604.3708++ 403.2496+++	2 3	604.370818 403.249637	LKALPM[+16]HIRL	928026592
sp|P02754|LACB_BOVIN"	SAPLRVYVEELK	702.3983++	2	702.398	SAPLRVYVEELK	49316544
sp|P02754|LACB_BOVIN"	DYKKYLL	471.7684++	2	471.768	DYKKYLL	394395648
sp|P02754|LACB_BOVIN"	TKIPAVFK	452.2867++	2	452.287	TKIPAVFK	132455224
sp|P02754|LACB_BOVIN"	TDYKKYLLF	595.8264++	2	595.826	TDYKKYLLF	184022288
sp|P02754|LACB_BOVIN"	EALEKFDKALKALPMHIRLSFNPTQLEEQCHI	942.2418++++	4	942.242	EALEKFDKALKALPM[+16]HIRLSFNPTQLEEQCHI	32916048
sp|P02754|LACB_BOVIN"	ECAQKKIIAEK	630.8527++ 420.9042+++	2 3	630.852655 420.904195	ECAQKKIIAEK	126505546
sp|P02754|LACB_BOVIN"	MENSAEPEQSL	625.7639++	2	625.764	M[+16]ENSAEPEQSL	129243248
sp|P02754|LACB_BOVIN"	ALEKFDKALKALPM	525.6373+++	3	525.637	ALEKFDKALKALPM	73610616
sp|P02754|LACB_BOVIN"	FCMENSAEPEQS	694.2607++	2	694.261	FCM[+16]ENSAEPEQS	66797976
sp|P02754|LACB_BOVIN"	KFDKAL	361.2158++	2	361.216	KFDKAL	52164164
sp|P02754|LACB_BOVIN"	KALKALPMHIRLSFNPTQLEEQCHI	978.5211+++	3	978.521	KALKALPM[+16]HIRLSFNPTQLEEQCHI	87368416
sp|P02754|LACB_BOVIN"	LIVTQTMKGLDIQKVAGTWYSLAMAASD	1004.5242+++	3	1004.52	LIVTQTMKGLDIQKVAGTWYSLAMAASD	2632197
sp|P02754|LACB_BOVIN"	KALPMHIRL	539.8313++ 360.2233+++	2 3	539.831329 360.223311	KALPMHIRL	125221860
sp|P02754|LACB_BOVIN"	LIVTQTMKGLDIQKVAGTWYSLAMAASD	1522.2776++ 1015.1875+++	2 3	1522.277574 1015.187475	LIVTQTM[+16]KGLDIQKVAGTWYSLAM[+16]AASD	575999958
sp|P02754|LACB_BOVIN"	LDAQSAPLRVYVEELKPTPEGDLE	890.4605+++	3	890.46	LDAQSAPLRVYVEELKPTPEGDLE	8968978
sp|P02754|LACB_BOVIN"	SAPLRVYVEELKPTPEGD	1000.5204++ 667.3493+++	2 3	1000.520387 667.34935	SAPLRVYVEELKPTPEGD	2074189888
sp|P02754|LACB_BOVIN"	KFDKALKALPMH	354.4523++++	4	354.452	KFDKALKALPM[+16]H	118324336
sp|P02754|LACB_BOVIN"	RTPEVDDE	480.7171++	2	480.717	RTPEVDDE	23469572
sp|P02754|LACB_BOVIN" tr|Q9BDG3|Q9BDG3_BOVIN"	LKPTPEGDL	485.2662++	2	485.266	LKPTPEGDL	13905432576
sp|P02754|LACB_BOVIN" tr|Q9BDG3|Q9BDG3_BOVIN"	QSAPLRV	385.7296++	2	385.73	QSAPLRV	1131555072
sp|P02754|LACB_BOVIN" tr|Q9BDG3|Q9BDG3_BOVIN"	DAQSAPLRV	478.7616++	2	478.762	DAQSAPLRV	21302755328
sp|P02754|LACB_BOVIN" tr|Q9BDG3|Q9BDG3_BOVIN"	LKPTPEGD	428.7242++	2	428.724	LKPTPEGD	1974209664
sp|P02754|LACB_BOVIN" tr|Q9BDG3|Q9BDG3_BOVIN"	SAPLRVYVE	517.2875++	2	517.287	SAPLRVYVE	868249600
sp|P02754|LACB_BOVIN" tr|Q9BDG3|Q9BDG3_BOVIN"	KPTPEGDL	428.7242++	2	428.724	KPTPEGDL	2289157888
sp|P02754|LACB_BOVIN" tr|Q9BDG3|Q9BDG3_BOVIN"	ISLLDAQSAPLRV	691.9037++	2	691.904	ISLLDAQSAPLRV	385673408
sp|P02754|LACB_BOVIN" tr|Q9BDG3|Q9BDG3_BOVIN"	AMAASDISLLD	553.7735++	2	553.774	AMAASDISLLD	1673978112
sp|P02754|LACB_BOVIN" tr|Q9BDG3|Q9BDG3_BOVIN"	AMAASDISLLD	561.7710++	2	561.771	AM[+16]AASDISLLD	1134494720
sp|P02754|LACB_BOVIN" tr|Q9BDG3|Q9BDG3_BOVIN"	KPTPEGDLE	493.2455++	2	493.245	KPTPEGDLE	670688064
sp|P02754|LACB_BOVIN" tr|Q9BDG3|Q9BDG3_BOVIN"	AMAASDISLL	504.2575++	2	504.258	AM[+16]AASDISLL	94928912
sp|P02754|LACB_BOVIN" tr|Q9BDG3|Q9BDG3_BOVIN"	LDAQSAPLRV	535.3037++ 357.2049+++	2 3	535.303655 357.204862	LDAQSAPLRV	22985956008
sp|P02754|LACB_BOVIN" tr|Q9BDG3|Q9BDG3_BOVIN"	LEILLQKWE	586.3397++	2	586.34	LEILLQKWE	8136985
sp|P02754|LACB_BOVIN" tr|Q9BDG3|Q9BDG3_BOVIN"	AMAASDISLLDAQSAPLRVY	703.3613+++	3	703.361	AM[+16]AASDISLLDAQSAPLRVY	15992426
sp|P02754|LACB_BOVIN" tr|Q9BDG3|Q9BDG3_BOVIN"	AMAASDISLLDAQ	661.3188++	2	661.319	AM[+16]AASDISLLDAQ	50428096
sp|P02754|LACB_BOVIN" tr|Q9BDG3|Q9BDG3_BOVIN"	SLAMAASDISLLD	661.8290++	2	661.829	SLAM[+16]AASDISLLD	64906192
sp|P02754|LACB_BOVIN" tr|Q9BDG3|Q9BDG3_BOVIN"	MAASDISLLDAQSAPLRV	929.4906++	2	929.491	MAASDISLLDAQSAPLRV	19250618
sp|P02754|LACB_BOVIN" tr|Q9BDG3|Q9BDG3_BOVIN"	LEILLQK	428.7788++	2	428.779	LEILLQK	151745728
sp|P02754|LACB_BOVIN" tr|Q9BDG3|Q9BDG3_BOVIN"	ISLLDAQSAPLR	642.3695++	2	642.37	ISLLDAQSAPLR	179993504
sp|P02754|LACB_BOVIN" tr|Q9BDG3|Q9BDG3_BOVIN"	AQSAPLRVY	502.7798++	2	502.78	AQSAPLRVY	314875616
sp|P02754|LACB_BOVIN" tr|Q9BDG3|Q9BDG3_BOVIN"	AQSAPLRVYVE	616.8353++	2	616.835	AQSAPLRVYVE	1188566912
sp|P02754|LACB_BOVIN" tr|Q9BDG3|Q9BDG3_BOVIN"	MAASDISLL	468.7390++	2	468.739	M[+16]AASDISLL	59516824
sp|P02754|LACB_BOVIN" tr|Q9BDG3|Q9BDG3_BOVIN"	AASDISLLDAQSAPLRV	863.9703++ 576.3160+++	2 3	863.970333 576.315981	AASDISLLDAQSAPLRV	353912472
sp|P02754|LACB_BOVIN" tr|Q9BDG3|Q9BDG3_BOVIN"	LDAQSAPLR	485.7694++	2	485.769	LDAQSAPLR	30679900
sp|P02754|LACB_BOVIN" tr|Q9BDG3|Q9BDG3_BOVIN"	AMAASDISLLDAQSAPLRVY	1046.5408++	2	1046.54	AMAASDISLLDAQSAPLRVY	19405410
sp|P02754|LACB_BOVIN" tr|Q9TRB9|Q9TRB9_BOVIN"	LDIQKVAGTW	565.8139++	2	565.814	LDIQKVAGTW	1696192256
sp|P02754|LACB_BOVIN" tr|Q9TRB9|Q9TRB9_BOVIN"	LIVTQTMKGLDIQ	730.4131++	2	730.413	LIVTQTMKGLDIQ	9464705024
sp|P02754|LACB_BOVIN" tr|Q9TRB9|Q9TRB9_BOVIN"	LIVTQTMKGLDIQKVAGTW	1059.5850++ 706.7258+++	2 3	1059.585007 706.725763	LIVTQTM[+16]KGLDIQKVAGTW	1045350272
sp|P02754|LACB_BOVIN" tr|Q9TRB9|Q9TRB9_BOVIN"	LIVTQTMKG	503.7837++	2	503.784	LIVTQTM[+16]KG	202692411392
sp|P02754|LACB_BOVIN" tr|Q9TRB9|Q9TRB9_BOVIN"	LIVTQTMKGL	560.3257++	2	560.326	LIVTQTM[+16]KGL	93962747904
sp|P02754|LACB_BOVIN" tr|Q9TRB9|Q9TRB9_BOVIN"	LIVTQTMKGLDIQKVA	879.5133++ 586.6780+++	2 3	879.513322 586.677973	LIVTQTMKGLDIQKVA	21032356864
sp|P02754|LACB_BOVIN" tr|Q9TRB9|Q9TRB9_BOVIN"	LIVTQTMKGLDIQKVA	592.0096+++	3	592.01	LIVTQTM[+16]KGLDIQKVA	9361201152
sp|P02754|LACB_BOVIN" tr|Q9TRB9|Q9TRB9_BOVIN"	LIVTQTMK	475.2730++	2	475.273	LIVTQTM[+16]K	95863095296
sp|P02754|LACB_BOVIN" tr|Q9TRB9|Q9TRB9_BOVIN"	LIVTQTMKGLDIQKVAG	908.0241++ 605.6851+++	2 3	908.024054 605.685128	LIVTQTMKGLDIQKVAG	50764390400
sp|P02754|LACB_BOVIN" tr|Q9TRB9|Q9TRB9_BOVIN"	LIVTQTMKG	495.7863++	2	495.786	LIVTQTMKG	243792953344
sp|P02754|LACB_BOVIN" tr|Q9TRB9|Q9TRB9_BOVIN"	LIVTQTMKGLDIQKVAGT	639.3677+++	3	639.368	LIVTQTMKGLDIQKVAGT	2599927296
sp|P02754|LACB_BOVIN" tr|Q9TRB9|Q9TRB9_BOVIN"	LIVTQTMKGLDI	666.3838++	2	666.384	LIVTQTMKGLDI	268531232
sp|P02754|LACB_BOVIN" tr|Q9TRB9|Q9TRB9_BOVIN"	IVTQTMKGLD	561.2972++	2	561.297	IVTQTM[+16]KGLD	23359078400
sp|P02754|LACB_BOVIN" tr|Q9TRB9|Q9TRB9_BOVIN"	LIVTQTMKGL	552.3283++	2	552.328	LIVTQTMKGL	110183448576
sp|P02754|LACB_BOVIN" tr|Q9TRB9|Q9TRB9_BOVIN"	LIVTQTMK	467.2755++	2	467.276	LIVTQTMK	125360472064
sp|P02754|LACB_BOVIN" tr|Q9TRB9|Q9TRB9_BOVIN"	LIVTQTMKGLDIQKV	843.9948++ 562.9989+++	2 3	843.994765 562.998935	LIVTQTMKGLDIQKV	903627200
sp|P02754|LACB_BOVIN" tr|Q9TRB9|Q9TRB9_BOVIN"	LIVTQTMKGLD	617.8392++ 412.2286+++	2 3	617.839213 412.228568	LIVTQTM[+16]KGLD	1768264017920
sp|P02754|LACB_BOVIN" tr|Q9TRB9|Q9TRB9_BOVIN"	LIVTQTMKGLDIQKVAGTW	1051.5875++ 701.3941+++	2 3	1051.58755 701.394125	LIVTQTMKGLDIQKVAGTW	68238848
sp|P02754|LACB_BOVIN" tr|Q9TRB9|Q9TRB9_BOVIN"	LIVTQTMKGLDIQKVAGTWY	761.0802+++	3	761.08	LIVTQTM[+16]KGLDIQKVAGTWY	226616400
sp|P02754|LACB_BOVIN" tr|Q9TRB9|Q9TRB9_BOVIN"	VTQTMKGLD	504.7551++	2	504.755	VTQTM[+16]KGLD	168482624
sp|P02754|LACB_BOVIN" tr|Q9TRB9|Q9TRB9_BOVIN"	LIVTQTMKGLDIQK	794.4606++ 529.9761+++	2 3	794.460558 529.976131	LIVTQTMKGLDIQK	4626140160
sp|P02754|LACB_BOVIN" tr|Q9TRB9|Q9TRB9_BOVIN"	DIQKVAGTW	509.2718++	2	509.272	DIQKVAGTW	538404352
sp|P02754|LACB_BOVIN" tr|Q9TRB9|Q9TRB9_BOVIN"	IVTQTMKGL	495.7863++	2	495.786	IVTQTMKGL	1534396672
sp|P02754|LACB_BOVIN" tr|Q9TRB9|Q9TRB9_BOVIN"	TQTMKGLD	447.2235++	2	447.223	TQTMKGLD	589460096
sp|P02754|LACB_BOVIN" tr|Q9TRB9|Q9TRB9_BOVIN"	LIVTQTMKGLDIQKVAGT	966.5454++ 644.6993+++	2 3	966.545351 644.699326	LIVTQTM[+16]KGLDIQKVAGT	1876476416
sp|P02754|LACB_BOVIN" tr|Q9TRB9|Q9TRB9_BOVIN"	IQKVAGTWY	533.2900++	2	533.29	IQKVAGTWY	251962176
sp|P02754|LACB_BOVIN" tr|Q9TRB9|Q9TRB9_BOVIN"	LIVTQTMKGLDI	674.3812++	2	674.381	LIVTQTM[+16]KGLDI	392640224
sp|P02754|LACB_BOVIN" tr|Q9TRB9|Q9TRB9_BOVIN"	LIVTQTMKGLDIQKV	851.9922++	2	851.992	LIVTQTM[+16]KGLDIQKV	294886464
sp|P02754|LACB_BOVIN" tr|Q9TRB9|Q9TRB9_BOVIN"	IVTQTMKGLDIQKVAGTW	663.6994+++	3	663.699	IVTQTMKGLDIQKVAGTW	82396432
sp|P02754|LACB_BOVIN" tr|Q9TRB9|Q9TRB9_BOVIN"	LIVTQTMKGLD	609.8418++ 406.8969+++	2 3	609.841756 406.896929	LIVTQTMKGLD	2095021355680
sp|P02754|LACB_BOVIN" tr|Q9TRB9|Q9TRB9_BOVIN"	LIVTQTMKGLDIQKVAGTWY	755.7486+++	3	755.749	LIVTQTMKGLDIQKVAGTWY	155581888
sp|P02754|LACB_BOVIN" tr|Q9TRB9|Q9TRB9_BOVIN"	LIVTQTMKGLDIQK	802.4580++ 535.3078+++	2 3	802.458016 535.307769	LIVTQTM[+16]KGLDIQK	389489936
sp|P02754|LACB_BOVIN" tr|Q9TRB9|Q9TRB9_BOVIN"	LIVTQTMKGLDIQ	738.4105++	2	738.411	LIVTQTM[+16]KGLDIQ	717327680
sp|P11151|LIPL_BOVIN"	VNRITGLD	444.2509++	2	444.251	VNRITGLD	429727904
sp|P11151|LIPL_BOVIN"	KVNRITGLD	508.2984++	2	508.298	KVNRITGLD	452848128
sp|P11151|LIPL_BOVIN"	DRITGGKDFRDIESK	579.6357+++ 434.9786++++	3 4	579.635713 434.978604	DRITGGKDFRDIESK	715017024
sp|P11151|LIPL_BOVIN"	DRITGGKDFRD	427.2178+++	3	427.218	DRITGGKDFRD	67534624
sp|P11151|LIPL_BOVIN"	DRITGGKDFR	388.8755+++	3	388.876	DRITGGKDFR	52645504
sp|P18892|BT1A1_BOVIN"	THRGEEFPSMSESRNPD	659.2903+++	3	659.29	THRGEEFPSMSESRNPD	105780056
sp|P18892|BT1A1_BOVIN"	VSREGQEQEGEEMAEYR	681.6288+++	3	681.629	VSREGQEQEGEEM[+16]AEYR	1346342400
sp|P18892|BT1A1_BOVIN"	VSREGQEQEGEEMAEYRGR	747.3381+++	3	747.338	VSREGQEQEGEEMAEYRGR	179077552
sp|P18892|BT1A1_BOVIN"	IPLSPMGEDSASGDIETLH	984.9646++	2	984.965	IPLSPMGEDSASGDIETLH	227140736
sp|P18892|BT1A1_BOVIN"	APFDVIGPQEPIL	698.3796++	2	698.38	APFDVIGPQEPIL	222538464
sp|P18892|BT1A1_BOVIN"	IQEVKASD	445.2349++	2	445.235	IQEVKASD	145591008
sp|P18892|BT1A1_BOVIN"	VEDHIAEGSVAVR	461.2405+++	3	461.241	VEDHIAEGSVAVR	172913968
sp|P18892|BT1A1_BOVIN"	VSREGQEQEGEEMA	789.8387++	2	789.839	VSREGQEQEGEEMA	126527000
sp|P18892|BT1A1_BOVIN"	VSREGQEQEGEEM	762.3176++	2	762.318	VSREGQEQEGEEM[+16]	6747245
sp|P18892|BT1A1_BOVIN"	VSREGQEQEGEEMAEYRGR	752.6697+++ 564.7541++++	3 4	752.669705 564.754098	VSREGQEQEGEEM[+16]AEYRGR	300162120
sp|P18892|BT1A1_BOVIN"	IQEVKASDD	502.7484++	2	502.748	IQEVKASDD	186552768
sp|P18892|BT1A1_BOVIN"	KEIPLSPMGEDSASGDIETLHSKLIPLQPSQ	834.1775++++	4	834.178	KEIPLSPM[+16]GEDSASGDIETLHSKLIPLQPSQ	173573888
sp|P18892|BT1A1_BOVIN"	SASGDIETLH	515.2460++	2	515.246	SASGDIETLH	187888192
sp|P18892|BT1A1_BOVIN"	VSREGQEQEGEEMAEY	943.8891++ 629.5951+++	2 3	943.889077 629.595143	VSREGQEQEGEEM[+16]AEY	450622360
sp|P18892|BT1A1_BOVIN"	VSREGQEQEGEEMAEYR	1013.9422++ 676.2972+++	2 3	1013.942175 676.297209	VSREGQEQEGEEMAEYR	2191819328
sp|P18892|BT1A1_BOVIN"	THRGEEFPSMSESRNPDEEGLFTVR	975.1140+++	3	975.114	THRGEEFPSM[+16]SESRNPDEEGLFTVR	513843040
sp|P18892|BT1A1_BOVIN"	KEIPLSPMGEDSASGDIETLHSKLIPLQPSQGVP	893.4645++++	4	893.464	KEIPLSPMGEDSASGDIETLHSKLIPLQPSQGVP	43217052
sp|P18892|BT1A1_BOVIN"	VSREGQEQEGEEMA	797.8361++	2	797.836	VSREGQEQEGEEM[+16]A	98459024
sp|P18892|BT1A1_BOVIN"	THRGEEFPSMSESRNPDEEGLFTVR	969.7824+++ 727.5886++++	3 4	969.782387 727.588609	THRGEEFPSMSESRNPDEEGLFTVR	683318528
sp|P18892|BT1A1_BOVIN"	WFREKVSPAVF	683.3693++	2	683.369	WFREKVSPAVF	91624592
sp|P18892|BT1A1_BOVIN"	PDTAHPHLF	517.7563++	2	517.756	PDTAHPHLF	384292288
sp|P18892|BT1A1_BOVIN"	GEEFPSMSESRNPDEEGLFTVR	838.3798+++	3	838.38	GEEFPSMSESRNPDEEGLFTVR	97927656
sp|P18892|BT1A1_BOVIN"	EEGLFTVR	475.7507++	2	475.751	EEGLFTVR	227336576
sp|P18892|BT1A1_BOVIN"	VSREGQEQEGEEMAE	854.3600++	2	854.36	VSREGQEQEGEEMAE	13102998
sp|P18892|BT1A1_BOVIN"	VSREGQEQEGEEMAEY	935.8916++	2	935.892	VSREGQEQEGEEMAEY	36897276
sp|P18892|BT1A1_BOVIN"	THRGEEFPSMSESRNPDEEG	573.4962++++	4	573.496	THRGEEFPSMSESRNPDEEG	70783336
sp|P18892|BT1A1_BOVIN"	HPHLFLYEDSK	462.5665+++	3	462.566	HPHLFLYEDSK	58304624
sp|P18892|BT1A1_BOVIN"	VSREGQEQEGEEMAEYRG	700.6360+++	3	700.636	VSREGQEQEGEEM[+16]AEYRG	32411508
sp|P18892|BT1A1_BOVIN"	DPDTAHPHLFLYEDSK	628.9636+++	3	628.964	DPDTAHPHLFLYEDSK	59929036
sp|P24627|TRFL_BOVIN" tr|B9VPZ5|B9VPZ5_BOVIN" tr|Q19KS1|Q19KS1_BOVIN" tr|C7FE01|C7FE01_BOVIN"	GGMVFEAGRD	527.7347++	2	527.735	GGM[+16]VFEAGRD	1069641664
sp|P24627|TRFL_BOVIN" tr|B9VPZ5|B9VPZ5_BOVIN" tr|Q19KS1|Q19KS1_BOVIN" tr|C7FE01|C7FE01_BOVIN"	GGMVFEAGRD	519.7373++	2	519.737	GGMVFEAGRD	386521248
sp|P24627|TRFL_BOVIN" tr|B9VPZ5|B9VPZ5_BOVIN" tr|Q19KS1|Q19KS1_BOVIN" tr|C7FE01|C7FE01_BOVIN" tr|Q6LBN7|Q6LBN7_BOVIN"	SALGFLRIPSKVD	468.2733+++	3	468.273	SALGFLRIPSKVD	83914744
sp|P26779|SAP_BOVIN"	NVIPALGLVEPIKKD	535.9907+++	3	535.991	NVIPALGLVEPIKKD	136294336
sp|P31096|OSTP_BOVIN"	RSNVQSPDATEE	706.7881++	2	706.788	RSNVQSPDAT[+80]EE	318337760
sp|P31096|OSTP_BOVIN"	SNVQSPDATEEDFTSHIESEEMHD	938.6955+++	3	938.696	SNVQSPDATEEDFTS[+80]HIESEEMHD	14705909760
sp|P31096|OSTP_BOVIN"	SNVQSPDATEEDFTSHIESEEMHD	992.0064+++	3	992.006	SNVQSPDAT[+80]EEDFT[+80]S[+80]HIESEEMHD	3035956224
sp|P31096|OSTP_BOVIN"	SNVQSPDATEED	686.2510++	2	686.251	SNVQSPDAT[+80]EED	5593224704
sp|P31096|OSTP_BOVIN"	FTSHIESEEMHDAPKKTSQLTD	871.0509+++	3	871.051	FTSHIES[+80]EEMHDAPKKTSQLTD	254421888
sp|P31096|OSTP_BOVIN"	RSNVQSPDATEED	724.3184++	2	724.318	RSNVQSPDATEED	1729514752
sp|P31096|OSTP_BOVIN"	SNVQSPDATEEDFTSHIESEEMHD	965.3510+++ 965.3510+++	3 3	965.350968 965.350968	SNVQSPDAT[+80]EEDFTS[+80]HIESEEMHD SNVQSPDAT[+80]EEDFT[+80]SHIESEEMHD	76402114560
sp|P31096|OSTP_BOVIN"	TSHIESEEMHD	665.7644++ 444.1787+++	2 3	665.764431 444.178713	TSHIESEEM[+16]HD	537121072
sp|P31096|OSTP_BOVIN"	SNVQSPDATEED	646.2679++	2	646.268	SNVQSPDATEED	2938827776
sp|P31096|OSTP_BOVIN"	DAPKKTSQLTD	602.3144++	2	602.314	DAPKKTSQLTD	681105152
sp|P31096|OSTP_BOVIN"	SLEDKLDLDHKSEEDKHL	538.5196++++	4	538.52	SLEDKLDLDHKSEEDKHL	104544760
sp|P31096|OSTP_BOVIN"	APKKTSQLTDHSKETNSSELSKELTPKAKD	1126.8978+++	3	1126.9	APKKTSQLTDHS[+80]KETNSSELSKELTPKAKD	176886912
sp|P31096|OSTP_BOVIN"	APKKTSQLTDH	409.2227+++	3	409.223	APKKTSQLTDH	608192768
sp|P31096|OSTP_BOVIN"	LDHKSEEDKHLK	493.5914+++ 370.4454++++	3 4	493.591445 370.445403	LDHKSEEDKHLK	2295260992
sp|P31096|OSTP_BOVIN"	SNVQSPDATEEDFTSHIESEEMHD	912.0401+++	3	912.04	SNVQSPDATEEDFTSHIESEEMHD	7533462528
sp|P31096|OSTP_BOVIN"	KLDLDHKSEEDKHL	893.9222++ 596.2839+++ 447.4647++++	2 3 4	893.922198 596.283891 447.464737	KLDLDHKS[+80]EEDKHL	11956283232
sp|P31096|OSTP_BOVIN"	SNVQSPDATEEDFTSHIESEEMHD	1447.5228++	2	1447.52	SNVQS[+80]PDATEEDFTSHIES[+80]EEMHD	6303546368
sp|P31096|OSTP_BOVIN"	ISHELDSASSEVN	694.3204++	2	694.32	ISHELDSASSEVN	384159680
sp|P31096|OSTP_BOVIN"	APKKTSQLTDHSKETNSSELSKELTPK	746.8938++++	4	746.894	APKKTSQLTDHSKETNSSELSKELTPK	1871009024
sp|P31096|OSTP_BOVIN"	FTSHIESEEMHD	739.2986++ 493.2015+++	2 3	739.298638 493.201517	FTSHIESEEM[+16]HD	1829121728
sp|P31096|OSTP_BOVIN"	KLDLDHKSEEDKHLKIR	728.7106+++ 546.7848++++	3 4	728.710604 546.784772	KLDLDHKS[+80]EEDKHLKIR	1215754160
sp|P31096|OSTP_BOVIN"	ATEEDFTSHIESEEMHD	1011.8971++ 674.9338+++	2 3	1011.897099 674.933825	ATEEDFTSHIESEEM[+16]HD	425940608
sp|P31096|OSTP_BOVIN"	SNVQSPDATEEDFTSHIESEEMHD	1407.5396++ 938.6955+++ 1407.5396++ 938.6955+++	2 3 2 3	1407.539648 938.695524 1407.539648 938.695524	SNVQSPDATEEDFTSHIES[+80]EEMHD SNVQSPDAT[+80]EEDFTSHIESEEMHD	33379405824
sp|P31096|OSTP_BOVIN"	SNVQSPDATEEDFTSHIESEEMHD	1407.5396++ 938.6955+++	2 3	1407.539648 938.695524	SNVQS[+80]PDATEEDFTSHIESEEMHD	16689702912
sp|P31096|OSTP_BOVIN"	KLDLDHKSEEDKHLK	612.3268+++ 459.4969++++	3 4	612.326768 459.496895	KLDLDHKSEEDKHLK	3861495168
sp|P31096|OSTP_BOVIN"	HKSEEDKHLKIR	400.7055++++	4	400.706	HKS[+80]EEDKHLKIR	198501488
sp|P31096|OSTP_BOVIN"	LDHKSEEDKHLKIR	609.9753+++	3	609.975	LDHKS[+80]EEDKHLKIR	191753744
sp|P31096|OSTP_BOVIN"	LDHKSEEDKHL	715.8192++ 477.5486+++	2 3	715.819213 477.548567	LDHKS[+80]EEDKHL	4125447680
sp|P31096|OSTP_BOVIN"	APKKTSQLTDHSKETNSSELSKELTPKAKD	845.4252++++ 845.4252++++	4 4	845.425166 845.425166	APKKTSQLTDHSKETNSSELS[+80]KELTPKAKD APKKTSQLTDHSKET[+80]NSSELSKELTPKAKD	3506572544
sp|P31096|OSTP_BOVIN"	RSNVQSPDATEEDFTSHIESEEMHD	1044.0401+++	3	1044.04	RSNVQSPDAT[+80]EEDFT[+80]SHIES[+80]EEMHD	786774528
sp|P31096|OSTP_BOVIN"	KLDLDHKSEEDKH	558.5892+++	3	558.589	KLDLDHKS[+80]EEDKH	16636779
sp|P31096|OSTP_BOVIN"	LDHKSEEDKHL	675.8360++ 450.8931+++	2 3	675.836048 450.893124	LDHKSEEDKHL	3083181568
sp|P31096|OSTP_BOVIN"	KLDLDHKSEED	443.5491+++	3	443.549	KLDLDHKSEED	828785408
sp|P31096|OSTP_BOVIN"	SNVQSPDATEEDFTSHIESEEMHD	1447.5228++ 965.3510+++	2 3	1447.522814 965.350968	SNVQSPDAT[+80]EEDFTSHIES[+80]EEMHD	44033805824
sp|P31096|OSTP_BOVIN"	KLDLDHKSEEDKHLK	957.9697++ 638.9822+++ 479.4885++++	2 3 4	957.96968 638.982212 479.488478	KLDLDHKS[+80]EEDKHLK	10651855584
sp|P31096|OSTP_BOVIN"	RSNVQSPDATEED	764.3016++	2	764.302	RSNVQSPDAT[+80]EED	4527607808
sp|P31096|OSTP_BOVIN"	RSNVQSPDATEEDFTSHIESEEMHD	763.2903++++	4	763.29	RSNVQSPDAT[+80]EEDFT[+80]SHIESEEMHD	957938368
sp|P31096|OSTP_BOVIN"	FTSHIESEEMHD	731.3012++ 487.8699+++	2 3	731.30118 487.869879	FTSHIESEEMHD	2791250560
sp|P31096|OSTP_BOVIN"	KLDLDHKSEEDKHLKIR	526.7932++++	4	526.793	KLDLDHKSEEDKHLKIR	447957344
sp|P31096|OSTP_BOVIN"	TSHIESEEMHD	697.7501++ 465.5025+++	2 3	697.750139 465.502518	TSHIES[+80]EEMHD	2556266880
sp|P31096|OSTP_BOVIN"	SNVQSPDATEE	628.7376++	2	628.738	SNVQSPDAT[+80]EE	478623136
sp|P31096|OSTP_BOVIN"	APKKTSQLTDHSKETNSSELSKELTPKAKDKN	905.9596++++	4	905.96	APKKTSQLTDHSKETNSSELS[+80]KELTPKAKDKN	226229696
sp|P31096|OSTP_BOVIN"	ATEEDFTSHIESEEMHD	1083.8660++ 722.9131+++	2 3	1083.865972 722.913074	AT[+80]EEDFTSHIES[+80]EEMHD	3035807104
sp|P31096|OSTP_BOVIN"	APKKTSQLTDHSKETN	622.2982+++	3	622.298	APKKTSQLTDHS[+80]KETN	220861648
sp|P31096|OSTP_BOVIN"	APKKTSQLTDHSKETNSSELSKELTPKA	764.6531++++	4	764.653	APKKTSQLTDHSKETNSSELSKELTPKA	1032987392
sp|P31096|OSTP_BOVIN"	APKKTSQLTDHSKETNSSELSKELTPKAKD	865.4167++++ 865.4167++++	4 4	865.416749 865.416749	APKKTSQLTDHSKET[+80]NS[+80]SELSKELTPKAKD APKKTSQLTDHS[+80]KETNS[+80]SELSKELTPKAKD	2972810880
sp|P31096|OSTP_BOVIN"	RISHELDSASSEVN	772.3710++ 515.2497+++	2 3	772.370983 515.249747	RISHELDSASSEVN	495939808
sp|P31096|OSTP_BOVIN"	RSNVQSPDATEEDFTSHIESEEMHD	990.7292+++ 990.7292+++ 743.2987++++	3 3 4	990.729228 990.729228 743.29874	RSNVQSPDATEEDFTSHIES[+80]EEMHD RSNVQSPDAT[+80]EEDFTSHIESEEMHD	3389301600
sp|P31096|OSTP_BOVIN"	FTSHIESEEMHD	771.2843++ 514.5253+++	2 3	771.284346 514.525323	FTSHIES[+80]EEMHD	2955109120
sp|P31096|OSTP_BOVIN"	APKKTSQLTDHSKETNSSELSKELTPKAKD	1153.5532+++ 865.4167++++	3 4	1153.55324 865.416749	APKKTSQLTDHS[+80]KET[+80]NSSELSKELTPKAKD	2566524304
sp|P31096|OSTP_BOVIN"	APKKTSQLTDHSKE	523.9459+++ 393.2112++++	3 4	523.945888 393.211235	APKKTSQLTDHSKE	317467520
sp|P31096|OSTP_BOVIN"	APKKTSQLTDHS	438.2334+++	3	438.233	APKKTSQLTDHS	55680540
sp|P31096|OSTP_BOVIN"	KLDLDHKSEEDKHL	853.9390++ 427.4732++++	2 4	853.939033 427.473154	KLDLDHKSEEDKHL	5912788032
sp|P31096|OSTP_BOVIN"	FTSHIESEEMHDAPK	586.5982+++	3	586.598	FTSHIESEEMHDAPK	36057572
sp|P31096|OSTP_BOVIN"	SNVQSPDATEEDFTSHIESEEMH	927.0087+++	3	927.009	SNVQSPDAT[+80]EEDFTSHIES[+80]EEMH	1280325376
sp|P31096|OSTP_BOVIN"	TSHIESEEMHD	657.7670++ 438.8471+++	2 3	657.766973 438.847074	TSHIESEEMHD	796721184
sp|P31096|OSTP_BOVIN"	LDHKSEEDKHLK	779.8667++ 520.2469+++ 390.4370++++	2 3 4	779.866695 520.246888 390.436985	LDHKS[+80]EEDKHLK	7443360360
sp|P31096|OSTP_BOVIN"	IESQENSKL	524.2695++	2	524.269	IESQENSKL	44069964
sp|P31096|OSTP_BOVIN"	APKKTSQLTDHSKETNSSELSKELTPK	766.8854++++ 766.8854++++	4 4	766.885411 766.885411	APKKTSQLTDHSKET[+80]NSSELSKELTPK APKKTSQLTDHS[+80]KETNSSELSKELTPK	2269382784
sp|P31096|OSTP_BOVIN"	APKKTSQLTDHSKETNSSELSKELTPKAKD	825.4336++++	4	825.434	APKKTSQLTDHSKETNSSELSKELTPKAKD	504194208
sp|P31096|OSTP_BOVIN"	APKKTSQLTDHSKETN	595.6428+++ 446.9839++++	3 4	595.642756 446.983886	APKKTSQLTDHSKETN	298791712
sp|P31096|OSTP_BOVIN"	KLDLDHKSEEDK	768.8507++ 512.9029+++	2 3	768.85071 512.902899	KLDLDHKS[+80]EEDK	837011744
sp|P31096|OSTP_BOVIN"	SEEDKHLKIR	418.8982+++	3	418.898	SEEDKHLKIR	72405984
sp|P31096|OSTP_BOVIN"	RSNVQSPDATE	642.2668++	2	642.267	RSNVQSPDAT[+80]E	164508592
sp|P31096|OSTP_BOVIN"	SNVQSPDATEEDFTSHIESEEMHDAPK	1064.0792+++	3	1064.08	SNVQSPDAT[+80]EEDFT[+80]SHIESEEMHDAPK	686230272
sp|P31096|OSTP_BOVIN"	KTSQLTDHSKETNSSELSKELTPK	896.7944+++ 672.8476++++	3 4	896.794399 672.847618	KTSQLTDHSKETNSSELSKELTPK	747724736
sp|P31096|OSTP_BOVIN"	HKSEEDKHLKIR	380.7139++++	4	380.714	HKSEEDKHLKIR	150794208
sp|P31096|OSTP_BOVIN"	APKKTSQLTDHSKETNSSELSKELTPK	786.8770++++	4	786.877	APKKTSQLTDHS[+80]KET[+80]NSSELSKELTPK	1058470080
sp|P31096|OSTP_BOVIN"	HKSEEDKHLK	417.5544+++	3	417.554	HKSEEDKHLK	433393024
sp|P31096|OSTP_BOVIN"	RSNVQSPDATEEDFTSHIESEEMHD	1525.5734++ 1017.3847+++	2 3	1525.573369 1017.384671	RSNVQSPDAT[+80]EEDFTSHIES[+80]EEMHD	5579214720
sp|P31096|OSTP_BOVIN"	ATEEDFTSHIESEEMHDAPKKTSQLTD	1079.4387+++	3	1079.44	AT[+80]EEDFT[+80]SHIESEEMHDAPKKTSQLTD	203563568
sp|P31096|OSTP_BOVIN"	LDHKSEEDKHLKIR	583.3198+++ 437.7417++++	3 4	583.319837 437.741696	LDHKSEEDKHLKIR	1072471328
sp|P31096|OSTP_BOVIN"	APKKTSQLTD	544.8009++	2	544.801	APKKTSQLTD	98212032
sp|P31096|OSTP_BOVIN"	HSKETNSSELSKELTPKAKD	578.0310++++	4	578.031	HS[+80]KETNSSELSKELTPKAKD	253546512
sp|P31096|OSTP_BOVIN"	KLDLDHKSEEDK	728.8675++ 486.2475+++ 364.9374++++	2 3 4	728.867545 486.247455 364.93741	KLDLDHKSEEDK	661938420
sp|P31096|OSTP_BOVIN"	RSNVQSPDATEEDFTSHIESEEMHD	743.2987++++	4	743.299	RSNVQSPDATEEDFT[+80]SHIESEEMHD	298913344
sp|P31096|OSTP_BOVIN"	SNVQSPDATEEDFTSHIESEEMH	900.3532+++ 900.3532+++	3 3	900.35321 900.35321	SNVQSPDATEEDFTS[+80]HIESEEMH SNVQSPDAT[+80]EEDFTSHIESEEMH	498368512
sp|P31096|OSTP_BOVIN"	APKKTSQLTDHSKETNSSELSKELTPK	1022.1781+++	3	1022.18	APKKTSQLTDHSKETNS[+80]SELSKELTPK	203239904
sp|P31096|OSTP_BOVIN"	DAPKKTSQLTDH	670.8439++ 447.5650+++	2 3	670.843873 447.565007	DAPKKTSQLTDH	147195660
sp|P31096|OSTP_BOVIN"	HSKETNSSELSKELTPKAKD	598.0226++++	4	598.023	HS[+80]KETNS[+80]SELSKELTPKAKD	106357624
sp|P31096|OSTP_BOVIN"	SSELSKELTPKAKD	511.6104+++	3	511.61	SSELSKELTPKAKD	62004768
sp|P31096|OSTP_BOVIN"	FTSHIESEEMHDAPKKTSQLTD	844.3955+++	3	844.395	FTSHIESEEMHDAPKKTSQLTD	59614972
sp|P31096|OSTP_BOVIN"	SNVQSPDATEEDFTSH	922.3545++	2	922.355	SNVQSPDAT[+80]EEDFTSH	428718176
sp|P31096|OSTP_BOVIN"	HKSEEDKHL	601.7637++ 401.5116+++	2 3	601.76371 401.511565	HKS[+80]EEDKHL	4791647424
sp|P31096|OSTP_BOVIN"	DKLDLDHKSEEDKHL	607.9708+++ 456.2299++++	3 4	607.970762 456.22989	DKLDLDHKSEEDKHL	210757112
sp|P31096|OSTP_BOVIN"	RSNVQSPDATEEDFTSHIESEEMHD	969.4054+++ 727.3059++++	3 4	969.405422 727.305886	RSNVQSPDATEEDFTSHIESEEM[+16]HD	675710816
sp|P31096|OSTP_BOVIN"	APKKTSQLTDHSKETNSSELSKELTPKAKDKN	885.9681++++	4	885.968	APKKTSQLTDHSKETNSSELSKELTPKAKDKN	192213632
sp|P31096|OSTP_BOVIN"	HELDSASSEVN	594.2624++	2	594.262	HELDSASSEVN	477733888
sp|P31096|OSTP_BOVIN"	RSNVQSPDATEEDFTSHIESEEMHDAPK	1116.1130+++	3	1116.11	RSNVQSPDAT[+80]EEDFT[+80]SHIESEEMHDAPK	82094480
sp|P31096|OSTP_BOVIN"	HKSEEDKHLKI	455.2491+++	3	455.249	HKSEEDKHLKI	28197414
sp|P31096|OSTP_BOVIN"	APKKTSQLTDHSKETNSSELSKELTPKAKDK	877.4489++++	4	877.449	APKKTSQLTDHS[+80]KETNSSELSKELTPKAKDK	43080776
sp|P31096|OSTP_BOVIN"	DAPKKTSQLTDHSKETN	633.9851+++	3	633.985	DAPKKTSQLTDHSKETN	31696096
sp|P31096|OSTP_BOVIN"	KTSQLTDHSKETNSSELSKELTPKAKD	771.3790++++	4	771.379	KTSQLTDHSKET[+80]NSSELSKELTPKAKD	181324384
sp|P31096|OSTP_BOVIN"	HKSEEDKHL	561.7805++ 374.8561+++	2 3	561.780544 374.856121	HKSEEDKHL	2619511952
sp|P31096|OSTP_BOVIN"	KTSQLTDHSKETNSSELSKELTPKAKDKN	811.9218++++	4	811.922	KTSQLTDHSKETNSSELSKELTPKAKDKN	114707072
sp|P31096|OSTP_BOVIN"	DAPKKTSQLTDHSKETNSSELSKELTPKAKD	874.1819++++	4	874.182	DAPKKTSQLTDHS[+80]KETNSSELSKELTPKAKD	178289664
sp|P31096|OSTP_BOVIN"	HELDSASSEVN	634.2455++	2	634.246	HELDS[+80]ASSEVN	124607536
sp|P31096|OSTP_BOVIN"	RSNVQSPDATEE	666.8049++	2	666.805	RSNVQSPDATEE	69620712
sp|P31096|OSTP_BOVIN"	RSNVQSPDATE	602.2836++	2	602.284	RSNVQSPDATE	15157742
sp|P31096|OSTP_BOVIN"	HSKETNSSELSKELTPKAKD	797.0276+++	3	797.028	HS[+80]KET[+80]NSSELSKELTPKAKD	42123396
sp|P31096|OSTP_BOVIN"	DAPKKTSQLTDHSKETNSSELSKELTPK	775.6506++++	4	775.651	DAPKKTSQLTDHSKETNSSELSKELTPK	321075744
sp|P31096|OSTP_BOVIN"	IRISHELDSASSEVN	828.9130++ 552.9444+++	2 3	828.913015 552.944435	IRISHELDSASSEVN	394682064
sp|P31096|OSTP_BOVIN"	IRISHELDSASSEVN	868.8962++ 868.8962++	2 2	868.89618 868.89618	IRISHELDS[+80]ASSEVN IRIS[+80]HELDSASSEVN	189154288
sp|P31096|OSTP_BOVIN"	SNVQSPDATEEDFTSHIESEEMHD	1375.5539++ 917.3717+++	2 3	1375.55394 917.371719	SNVQSPDATEEDFTSHIESEEM[+16]HD	1942446344
sp|P31096|OSTP_BOVIN"	KTSQLTDHSKETNSSELSKELTPK	692.8392++++ 692.8392++++	4 4	692.839201 692.839201	KTSQLTDHSKET[+80]NSSELSKELTPK KTSQLTDHS[+80]KETNSSELSKELTPK	228453920
sp|P31096|OSTP_BOVIN"	KLDLDHK	434.7480++	2	434.748	KLDLDHK	79884752
sp|P31096|OSTP_BOVIN"	LDHKSEEDKHLKI	531.2861+++ 398.7164++++	3 4	531.286133 398.716419	LDHKSEEDKHLKI	365882352
sp|P31096|OSTP_BOVIN"	DFTSHIESEEMHD	526.2122+++	3	526.212	DFTSHIESEEMHD	26305520
sp|P31096|OSTP_BOVIN"	SHELDSASSEVN	637.7784++	2	637.778	SHELDSASSEVN	84112648
sp|P31096|OSTP_BOVIN"	DAPKKTSQLTDHSKETNSSELSKELTPKAKD	854.1903++++	4	854.19	DAPKKTSQLTDHSKETNSSELSKELTPKAKD	192365456
sp|P31096|OSTP_BOVIN"	HKSEEDKHLK	665.8112++ 444.2099+++	2 3	665.811191 444.209886	HKS[+80]EEDKHLK	1115431304
sp|P31096|OSTP_BOVIN"	APKKTSQLTDHSK	480.9317+++ 360.9506++++	3 4	480.93169 360.950586	APKKTSQLTDHSK	109146228
sp|P31096|OSTP_BOVIN"	KLDLDHKSEEDKHLKI	650.0215+++ 487.7679++++	3 4	650.021456 487.767911	KLDLDHKSEEDKHLKI	751506784
sp|P31096|OSTP_BOVIN"	SKELTPKAKDKNKHSNL	485.2746++++	4	485.275	SKELTPKAKDKNKHSNL	76653096
sp|P31096|OSTP_BOVIN"	SNVQSPDATEEDFTSHIESEEMHD	1487.5060++	2	1487.51	SNVQSPDAT[+80]EEDFT[+80]SHIES[+80]EEMHD	226141968
sp|P31096|OSTP_BOVIN"	SNVQSPDATEEDFTSHIESEEMH	873.6978+++	3	873.698	SNVQSPDATEEDFTSHIESEEMH	130905328
sp|P31096|OSTP_BOVIN"	ATEEDFTSHIESEEMHD	669.6022+++	3	669.602	ATEEDFTSHIESEEMHD	206946592
sp|P31096|OSTP_BOVIN"	FRRSNVQSPDATEED	610.9267+++	3	610.927	FRRSNVQSPDAT[+80]EED	171191296
sp|P31096|OSTP_BOVIN"	HSKETNSSELSKELTPK	638.9971+++ 479.4996++++	3 4	638.997088 479.499635	HSKETNSSELSKELTPK	258102120
sp|P31096|OSTP_BOVIN"	TSQLTDHSKETNSSELSKELTPKAKDKN	779.8981++++	4	779.898	TSQLTDHSKETNSSELSKELTPKAKDKN	78688856
sp|P31096|OSTP_BOVIN"	RSNVQSPDATEEDF	837.8358++	2	837.836	RSNVQSPDAT[+80]EEDF	74689104
sp|P31096|OSTP_BOVIN"	KLDLDHKSE	362.1926+++	3	362.193	KLDLDHKSE	17618522
sp|P31096|OSTP_BOVIN"	APKKTSQLTDHSKETNSSELSKELTPKA	784.6447++++	4	784.645	APKKTSQLTDHS[+80]KETNSSELSKELTPKA	257652224
sp|P31096|OSTP_BOVIN"	KHLKIR	397.7716++	2	397.772	KHLKIR	5597965
sp|P31096|OSTP_BOVIN"	KTSQLTDHSKETN	496.9145+++	3	496.914	KTSQLTDHSKETN	11630882
sp|P31096|OSTP_BOVIN"	SNVQSPDATEEDFTSHIE	1043.4179++	2	1043.42	SNVQSPDAT[+80]EEDFTSHIE	547870208
sp|P31096|OSTP_BOVIN"	SNVQSPDATEE	588.7544++	2	588.754	SNVQSPDATEE	123913592
sp|P31096|OSTP_BOVIN"	HIESEEMHD	563.7271++	2	563.727	HIESEEMHD	11011413
sp|P31096|OSTP_BOVIN"	SHIESEEMHD	647.2263++	2	647.226	SHIES[+80]EEMHD	69860544
sp|P31096|OSTP_BOVIN"	APKKTSQLTDHS	696.8296++	2	696.83	APKKTSQLTDHS[+80]	7480219
sp|P31096|OSTP_BOVIN"	ATEEDFTSHIESEEMHD	1043.8828++ 1043.8828++ 696.2576+++	2 2 3	1043.882807 1043.882807 696.25763	ATEEDFTSHIES[+80]EEMHD AT[+80]EEDFTSHIESEEMHD	481775712
sp|P31096|OSTP_BOVIN"	DKLDLDHKSEEDKHLK	677.3245+++ 508.2452++++	3 4	677.324526 508.245214	DKLDLDHKS[+80]EEDKHLK	112941376
sp|P31096|OSTP_BOVIN" tr|Q58DM6|Q58DM6_BOVIN"	GRGDSVAYGLKSRSKKF	619.3428+++ 464.7589++++	3 4	619.342753 464.758883	GRGDSVAYGLKSRSKKF	7372932608
sp|P31096|OSTP_BOVIN" tr|Q58DM6|Q58DM6_BOVIN"	LPVKPTSSGSSEEKQLNNKYPDAVATWLKPD	1160.5747+++ 870.6828++++	3 4	1160.574653 870.682809	LPVKPT[+80]SSGSSEEKQLNNKYPDAVATWLKPD	3349232064
sp|P31096|OSTP_BOVIN" tr|Q58DM6|Q58DM6_BOVIN"	SVAYGLKSRSKKF	735.9250++ 490.9524+++ 368.4661++++	2 3 4	735.925 490.952425 368.466138	SVAYGLKSRSKKF	6399450368
sp|P31096|OSTP_BOVIN" tr|Q58DM6|Q58DM6_BOVIN"	GRGDSVAYGLK	374.8682+++	3	374.868	GRGDSVAYGLK	956305344
sp|P31096|OSTP_BOVIN" tr|Q58DM6|Q58DM6_BOVIN"	LPVKPTSSGSSEEKQLNNKYPDAVATWLKPDPSQ	948.7187++++	4	948.719	LPVKPT[+80]SSGSSEEKQLNNKYPDAVATWLKPDPSQ	1167439872
sp|P31096|OSTP_BOVIN" tr|Q58DM6|Q58DM6_BOVIN"	VKPTSSGSSEEKQLNNKYPDAVATWLKPD	818.1486++++	4	818.149	VKPT[+80]SSGSSEEKQLNNKYPDAVATWLKPD	203387552
sp|P31096|OSTP_BOVIN" tr|Q58DM6|Q58DM6_BOVIN"	AVATWLKPD	500.7767++	2	500.777	AVATWLKPD	2427596544
sp|P31096|OSTP_BOVIN" tr|Q58DM6|Q58DM6_BOVIN"	LPVKPTSSGSSEEKQLNNKYPDAVATWLKPD	850.6912++++	4	850.691	LPVKPTSSGSSEEKQLNNKYPDAVATWLKPD	863687808
sp|P31096|OSTP_BOVIN" tr|Q58DM6|Q58DM6_BOVIN"	GRGDSVAYGLKSR	455.9126+++	3	455.913	GRGDSVAYGLKSR	418595744
sp|P31096|OSTP_BOVIN" tr|Q58DM6|Q58DM6_BOVIN"	SVAYGLK	369.2132++	2	369.213	SVAYGLK	902591168
sp|P31096|OSTP_BOVIN" tr|Q58DM6|Q58DM6_BOVIN"	VKPTSSGSSEEKQLNNKYPD	763.3529+++	3	763.353	VKPTS[+80]SGSSEEKQLNNKYPD	172284320
sp|P31096|OSTP_BOVIN" tr|Q58DM6|Q58DM6_BOVIN"	TPFIPTESAND	596.2800++	2	596.28	TPFIPTESAND	306972032
sp|P31096|OSTP_BOVIN" tr|Q58DM6|Q58DM6_BOVIN"	LPVKPTSSGSSEEKQLNNKYPDAVATWLKPDPSQK	980.7424++++	4	980.742	LPVKPTSSGSS[+80]EEKQLNNKYPDAVATWLKPDPSQK	830651776
sp|P31096|OSTP_BOVIN" tr|Q58DM6|Q58DM6_BOVIN"	AVATWLKPDPSQK	720.8959++ 480.9330+++	2 3	720.895908 480.933031	AVATWLKPDPSQK	3106414144
sp|P31096|OSTP_BOVIN" tr|Q58DM6|Q58DM6_BOVIN"	DSVAYGLKSRSKKF	529.2947+++ 397.2229++++	3 4	529.29474 397.222874	DSVAYGLKSRSKKF	144442704
sp|P31096|OSTP_BOVIN" tr|Q58DM6|Q58DM6_BOVIN"	LPVKPTSSGSSEEKQLNNKYPDAVAT	947.4620+++	3	947.462	LPVKPT[+80]SSGSSEEKQLNNKYPDAVAT	204885008
sp|P31096|OSTP_BOVIN" tr|Q58DM6|Q58DM6_BOVIN"	TPFIPTESANDGRGD	788.8655++	2	788.866	TPFIPTESANDGRGD	468651136
sp|P31096|OSTP_BOVIN" tr|Q58DM6|Q58DM6_BOVIN"	TPFIPTESANDGRGDSVAYGLKSR	635.3200++++	4	635.32	TPFIPTESANDGRGDSVAYGLKSR	120016264
sp|P31096|OSTP_BOVIN" tr|Q58DM6|Q58DM6_BOVIN"	SVAYGLKS	412.7293++	2	412.729	SVAYGLKS	302780416
sp|P31096|OSTP_BOVIN" tr|Q58DM6|Q58DM6_BOVIN"	TPFIPTESANDGRGDSVAYGLK	765.7132+++	3	765.713	TPFIPTESANDGRGDSVAYGLK	142424736
sp|P31096|OSTP_BOVIN" tr|Q58DM6|Q58DM6_BOVIN"	LPVKPTSSGSSEEKQLNNK	708.3509+++	3	708.351	LPVKPT[+80]SSGSSEEKQLNNK	81482920
sp|P31096|OSTP_BOVIN" tr|Q58DM6|Q58DM6_BOVIN"	GRGDSVAYGLKSRSK	395.9680++++	4	395.968	GRGDSVAYGLKSRSK	59604160
sp|P31096|OSTP_BOVIN" tr|Q58DM6|Q58DM6_BOVIN"	WLKPDPSQK	366.8696+++	3	366.87	WLKPDPSQK	90369456
sp|P31096|OSTP_BOVIN" tr|Q58DM6|Q58DM6_BOVIN"	TPFIPTESANDGRGDSVAY	998.9660++	2	998.966	TPFIPTESANDGRGDSVAY	37451904
sp|P46201|UTMP_BOVIN" tr|C4PU73|C4PU73_BOVIN"	LPKIDPK	405.7578++	2	405.758	LPKIDPK	55907000320
sp|P58073|PTHR_BOVIN"	VAGTGLEEDYLSDISATSLELNSRRH	971.7924+++ 729.0961++++	3 4	971.79238 729.096104	VAGTGLEEDYLSDIS[+80]ATSLELNSRRH VAGTGLEEDYLSDISAT[+80]SLELNSRRH	738537888
sp|P58073|PTHR_BOVIN"	VAGTGLEEDYLSDISATSLELNSRRH	945.1369+++ 709.1045++++	3 4	945.136936 709.104521	VAGTGLEEDYLSDISATSLELNSRRH	193902168
sp|P58073|PTHR_BOVIN"	AVSEHQLLHDKGKSIQD	635.6657+++ 477.0011++++	3 4	635.665672 477.001073	AVSEHQLLHDKGKSIQD	307574128
sp|P58073|PTHR_BOVIN"	DEGKYLTQETNK	713.3464++	2	713.346	DEGKYLTQETNK	25649356
sp|P58073|PTHR_BOVIN"	DEGKYLTQETNKVETYK	682.6724+++	3	682.672	DEGKYLTQETNKVETYK	223172784
sp|P58073|PTHR_BOVIN"	IHTAEIRATSEVSPNSKPAPNTKNHPV	724.6322++++	4	724.632	IHTAEIRATSEVSPNSKPAPNTKNHPV	105588184
sp|P58073|PTHR_BOVIN"	IHTAEIRATSEVSPNSKPAPNTK	816.7662+++ 612.8265++++	3 4	816.766226 612.826489	IHTAEIRATSEVSPNSKPAPNTK	264323032
sp|P58073|PTHR_BOVIN"	AVSEHQLLHDKGKSIQDLR	544.2974++++	4	544.297	AVSEHQLLHDKGKSIQDLR	370552640
sp|P58073|PTHR_BOVIN"	RAVSEHQLLHDKGKSIQDL	725.3941+++	3	725.394	RAVSEHQLLHDKGKSIQDL	93743568
sp|P58073|PTHR_BOVIN"	AVSEHQLLHDKGKSIQDL	1009.5369++ 673.3604+++	2 3	1009.536903 673.36036	AVSEHQLLHDKGKSIQDL	1141234608
sp|P58073|PTHR_BOVIN"	IHTAEIRATSEVSPNSKPAPNTKNHPVRFGSD	865.1947++++	4	865.195	IHTAEIRATSEVSPNSKPAPNTKNHPVRFGSD	101775584
sp|P60712|ACTB_BOVIN" tr|Q58DT9|Q58DT9_BOVIN"	SYVGDEAQSK	542.2513++	2	542.251	SYVGDEAQSK	19979522
sp|P79345|NPC2_BOVIN"	EPVKFKD	431.7371++	2	431.737	EPVKFKD	22062653440
sp|P79345|NPC2_BOVIN"	TSNTQSQSSKAVVHG	510.9217+++	3	510.922	TSNTQSQSSKAVVHG	27634056
sp|P79345|NPC2_BOVIN"	EPVKFK	374.2236++	2	374.224	EPVKFK	148778512
sp|P80025|PERL_BOVIN"	LSPWASREN	530.2645++	2	530.265	LSPWASREN	1119447296
sp|P80025|PERL_BOVIN"	DTIAQAASTTTISDAVSKVKIQ	750.0725+++	3	750.073	DTIAQAASTTTISDAVSKVKIQ	199863968
sp|P80025|PERL_BOVIN"	DTIAQAASTTTISDAVSKVK	669.6917+++	3	669.692	DTIAQAASTTTISDAVSKVK	148505696
sp|P80025|PERL_BOVIN"	LKTTLSSEAPTTQQLSEYFKHAKGRT	751.3800++++	4	751.38	LKT[+80]TLSSEAPTTQQLSEYFKHAKGRT	362754560
sp|P80025|PERL_BOVIN"	GQVWEESLKRL	448.9139+++	3	448.914	GQVWEESLKRL	180360896
sp|P80025|PERL_BOVIN"	LKTTLSSEAPTTQQLSEYFK	784.7172+++	3	784.717	LKT[+80]TLSSEAPTTQQLSEYFK	49145936
sp|P80025|PERL_BOVIN"	KLDLSPWASREN	708.3675++ 472.5808+++	2 3	708.367515 472.580769	KLDLSPWASREN	987347200
sp|P80025|PERL_BOVIN"	DTIAQAASTTTISDAVSKVKIQVNK	863.8080+++ 648.1078++++	3 4	863.80798 648.107804	DTIAQAASTTTISDAVSKVKIQVNK	129906920
sp|P80025|PERL_BOVIN"	SRTRLKTTLSSEAPTTQQLSEY	833.1013+++	3	833.101	SRTRLKTTLSSEAPTTQQLSEY	180030976
sp|P80025|PERL_BOVIN"	DTIAQAASTTTISDAVSKVKIQVN	821.1097+++	3	821.11	DTIAQAASTTTISDAVSKVKIQVN	118382456
sp|P80025|PERL_BOVIN"	AVSKVKIQVN	543.3375++	2	543.337	AVSKVKIQVN	71210200
sp|P80195|GLCM1_BOVIN"	ETHLEAQPTDASAQF	822.8786++	2	822.879	ETHLEAQPTDASAQF	2354543360
sp|P80195|GLCM1_BOVIN"	ILNKPEDETHLEAQ	818.9125++ 546.2774+++	2 3	818.912484 546.277414	ILNKPEDETHLEAQ	2062580160
sp|P80195|GLCM1_BOVIN"	LNKPEDETHLEAQPTD	918.9341++ 612.9585+++	2 3	918.934144 612.958522	LNKPEDETHLEAQPTD	25191376384
sp|P80195|GLCM1_BOVIN"	PSISREDLISKEQIVIR	688.3681+++ 688.3681+++	3 3	688.368066 688.368066	PSISREDLIS[+80]KEQIVIR PSIS[+80]REDLISKEQIVIR	1945557760
sp|P80195|GLCM1_BOVIN"	LSKEPSISREDLISKEQIVIR	840.7859+++ 630.8413++++	3 4	840.785949 630.841281	LSKEPS[+80]ISREDLISKEQIVIR	8408247040
sp|P80195|GLCM1_BOVIN"	ILNKPEDETHLEAQPTD	975.4762++ 650.6532+++	2 3	975.476176 650.65321	ILNKPEDETHLEAQPTD	278720053248
sp|P80195|GLCM1_BOVIN"	ILNKPEDET	529.7719++	2	529.772	ILNKPEDET	750738304
sp|P80195|GLCM1_BOVIN"	ILNKPEDETHLEAQPTDASAQFIR	1362.1854++ 908.4594+++ 681.5963++++	2 3 4	1362.185388 908.45935 681.596332	ILNKPEDETHLEAQPTDASAQFIR	29224427648
sp|P80195|GLCM1_BOVIN"	ILNKPEDETHLE	719.3646++ 479.9122+++	2 3	719.364638 479.912184	ILNKPEDETHLE	11869681920
sp|P80195|GLCM1_BOVIN"	ILNKPEDETHLEAQPTDASAQFIRNL	1475.7489++ 984.1683+++ 738.3781++++	2 3 4	1475.748883 984.168348 738.37808	ILNKPEDETHLEAQPTDASAQFIRNL	47158471552
sp|P80195|GLCM1_BOVIN"	LSKEPSISREDLISKEQIVIR	630.8413++++	4	630.841	LSKEPSISREDLIS[+80]KEQIVIR	5507189760
sp|P80195|GLCM1_BOVIN"	ILNKPEDETHLEAQPTDASAQFIRNLQISNED	1239.5862+++ 929.9414++++ 1239.5862+++	3 4 3	1239.586169 929.941446 1239.586169	ILNKPEDETHLEAQPTDASAQFIRNLQIS[+80]NED ILNKPEDETHLEAQPTDAS[+80]AQFIRNLQISNED	6979875072
sp|P80195|GLCM1_BOVIN"	LNKPEDETHLEAQPTDASAQF	1171.0508++ 781.0363+++	2 3	1171.050768 781.036271	LNKPEDETHLEAQPTDASAQF	8573032960
sp|P80195|GLCM1_BOVIN"	LSKEPSISREDLISKEQIVIR	650.8329++++	4	650.833	LSKEPS[+80]IS[+80]REDLISKEQIVIR	3311063552
sp|P80195|GLCM1_BOVIN"	LNKPEDETHLEAQPTDASAQFIR	870.7647+++ 653.3253++++	3 4	870.764662 653.325316	LNKPEDETHLEAQPTDASAQFIR	1727904960
sp|P80195|GLCM1_BOVIN"	SHAFEVVKT	509.2718++	2	509.272	SHAFEVVKT	6189670912
sp|P80195|GLCM1_BOVIN"	LENTVKETIKY	669.3692++ 446.5819+++	2 3	669.369192 446.581887	LENTVKETIKY	268696352
sp|P80195|GLCM1_BOVIN"	LISKEQIVIR	639.8627++ 426.9109+++	2 3	639.862695 426.910889	LIS[+80]KEQIVIR	23140063232
sp|P80195|GLCM1_BOVIN"	ETHLEAQPTDASAQFIRNL	1071.0347++ 714.3589+++	2 3	1071.034724 714.358908	ETHLEAQPTDASAQFIRNL	1486138720
sp|P80195|GLCM1_BOVIN"	ILNKPEDETHLEAQPTDASAQF	1227.5928++ 818.7310+++ 614.3000++++	2 3 4	1227.5928 818.730959 614.300038	ILNKPEDETHLEAQPTDASAQF	108600433664
sp|P80195|GLCM1_BOVIN"	SQNPKLPLSIL	605.3637++	2	605.364	SQNPKLPLSIL	940305984
sp|P80195|GLCM1_BOVIN"	ILNKPEDETH	598.3013++ 399.2033+++	2 3	598.301309 399.203298	ILNKPEDETH	1553865728
sp|P80195|GLCM1_BOVIN"	SSRQPQSQNPKLPLSIL	947.0313++ 631.6899+++	2 3	947.031256 631.689929	SSRQPQSQNPKLPLSIL	8661383936
sp|P80195|GLCM1_BOVIN"	LISKEQIVIR	599.8795++ 400.2554+++	2 3	599.87953 400.255445	LISKEQIVIR	10615639040
sp|P80195|GLCM1_BOVIN"	SRQPQSQNPKLPLSIL	602.6793+++	3	602.679	SRQPQSQNPKLPLSIL	331975104
sp|P80195|GLCM1_BOVIN"	ILNKPEDETHLEAQPT	917.9627++ 612.3109+++	2 3	917.962705 612.310895	ILNKPEDETHLEAQPT	5900595968
sp|P80195|GLCM1_BOVIN"	ASAQFIRN	453.7432++	2	453.743	ASAQFIRN	212561872
sp|P80195|GLCM1_BOVIN"	ILNKPEDETHLEAQPTDASAQFIRNLQISNED	1212.9307+++ 909.9499++++	3 4	1212.930726 909.949863	ILNKPEDETHLEAQPTDASAQFIRNLQISNED	6717239552
sp|P80195|GLCM1_BOVIN"	NTVKETIKY	548.3059++ 365.8730+++	2 3	548.305863 365.873001	NTVKETIKY	1162505664
sp|P80195|GLCM1_BOVIN"	PSISREDLISKEQIVIR	715.0235+++	3	715.024	PSIS[+80]REDLIS[+80]KEQIVIR	827333248
sp|P80195|GLCM1_BOVIN"	LKSLFSHAFEVVKT	803.4536++ 535.9715+++	2 3	803.45359 535.971486	LKSLFSHAFEVVKT	4387451648
sp|P80195|GLCM1_BOVIN"	ILNKPEDETHLEA	754.8832++ 503.5912+++	2 3	754.883195 503.591222	ILNKPEDETHLEA	2496043520
sp|P80195|GLCM1_BOVIN"	LNKPEDETHLEAQPTDASAQ	732.0135+++	3	732.013	LNKPEDETHLEAQPTDASAQ	195125504
sp|P80195|GLCM1_BOVIN"	LISKEQIVIRSS	726.8947++	2	726.895	LIS[+80]KEQIVIRSS	4796711936
sp|P80195|GLCM1_BOVIN"	LNKPEDETHLEAQPTDASAQFIRNLQISNED	881.6788++++	4	881.679	LNKPEDETHLEAQPTDASAQFIRNLQISNED	861364352
sp|P80195|GLCM1_BOVIN"	LSKEPSISREDLISKEQIVIR	867.4414+++	3	867.441	LSKEPS[+80]ISREDLIS[+80]KEQIVIR	3006855168
sp|P80195|GLCM1_BOVIN"	ASAQFIRNLQISNEDLSKEPSISRED	983.1634+++	3	983.163	ASAQFIRNLQISNEDLSKEPSISRED	359637376
sp|P80195|GLCM1_BOVIN"	ILNKPEDETHL	654.8433++ 436.8980+++	2 3	654.843341 436.897986	ILNKPEDETHL	4009127040
sp|P80195|GLCM1_BOVIN"	FSHAFEVVKT	582.8060++ 388.8731+++	2 3	582.806031 388.873112	FSHAFEVVKT	3579535232
sp|P80195|GLCM1_BOVIN"	ASAQFIRNL	510.2853++	2	510.285	ASAQFIRNL	4319987712
sp|P80195|GLCM1_BOVIN"	NKPEDETHLEAQPTD	862.3921++ 575.2638+++	2 3	862.392112 575.263834	NKPEDETHLEAQPTD	1764116928
sp|P80195|GLCM1_BOVIN"	KPEDETHLEAQPTD	805.3706++ 537.2495+++	2 3	805.370649 537.249524	KPEDETHLEAQPTD	335478568
sp|P80195|GLCM1_BOVIN"	PSISREDLISKEQIVIR	661.7126+++	3	661.713	PSISREDLISKEQIVIR	319851648
sp|P80195|GLCM1_BOVIN"	LNKPEDETHLE	662.8226++	2	662.823	LNKPEDETHLE	257657840
sp|P80195|GLCM1_BOVIN"	LSKEPSISREDLISKEQIVI	762.0968+++ 571.8244++++	3 4	762.096802 571.82442	LSKEPSISREDLISKEQIVI	991299744
sp|P80195|GLCM1_BOVIN"	ETHLEAQPTDASAQFIR	638.6499+++	3	638.65	ETHLEAQPTDASAQFIR	801414976
sp|P80195|GLCM1_BOVIN"	ILNKPEDETHLEAQPTDASAQFIRNL	1037.4792+++	3	1037.48	ILNKPEDETHLEAQPT[+80]DAS[+80]AQFIRNL	1667885568
sp|P80195|GLCM1_BOVIN"	IRNLQISNED	601.3122++	2	601.312	IRNLQISNED	3534200320
sp|P80195|GLCM1_BOVIN"	LSKEPSISRE	613.2948++	2	613.295	LSKEPS[+80]ISRE	94843216
sp|P80195|GLCM1_BOVIN"	VKETIKY	440.7606++	2	440.761	VKETIKY	890365184
sp|P80195|GLCM1_BOVIN"	SSRQPQSQNPKLPLSILKEKHL	843.4818+++ 632.8631++++	3 4	843.481761 632.86314	SSRQPQSQNPKLPLSILKEKHL	2159117696
sp|P80195|GLCM1_BOVIN"	IRNLQISNEDLSKEPSISRED	815.0856+++	3	815.086	IRNLQISNEDLSKEPSISRED	957129600
sp|P80195|GLCM1_BOVIN"	LNKPEDETHLEA	465.8965+++	3	465.897	LNKPEDETHLEA	107054952
sp|P80195|GLCM1_BOVIN"	ILNKPEDETHLEAQPTDASA	1090.0293++ 727.0220+++	2 3	1090.029304 727.021962	ILNKPEDETHLEAQPTDASA	1709981120
sp|P80195|GLCM1_BOVIN"	ILNKPEDETHLEAQPTDA	1010.9947++ 674.3322+++	2 3	1010.994733 674.332248	ILNKPEDETHLEAQPTDA	1883954976
sp|P80195|GLCM1_BOVIN"	NKPEDETHLEAQPTDASAQF	743.3416+++	3	743.342	NKPEDETHLEAQPTDASAQF	455511392
sp|P80195|GLCM1_BOVIN"	ILNKPEDETHLEAQPTDASAQ	1154.0586++ 769.7082+++	2 3	1154.058593 769.708154	ILNKPEDETHLEAQPTDASAQ	2331837552
sp|P80195|GLCM1_BOVIN"	IRNLQISNEDLSKEPSISRED	841.7411+++	3	841.741	IRNLQISNEDLSKEPS[+80]ISRED	569748480
sp|P80195|GLCM1_BOVIN"	ILNKPEDETHLEAQPTDASAQFIRNL	1010.8238+++ 758.3697++++	3 4	1010.823791 758.369662	ILNKPEDETHLEAQPTDAS[+80]AQFIRNL	250782080
sp|P80195|GLCM1_BOVIN"	ASTTEGKLMEL	590.2999++	2	590.3	ASTTEGKLMEL	231932608
sp|P80195|GLCM1_BOVIN"	ASAQFIRNLQISNED	893.4120++	2	893.412	ASAQFIRNLQIS[+80]NED	680654976
sp|P80195|GLCM1_BOVIN"	LSKEPSISREDLISKEQIVIRSS	654.3657++++	4	654.366	LSKEPSISREDLISKEQIVIRSS	223521504
sp|P80195|GLCM1_BOVIN"	LSKEPSISRED	630.8251++ 420.8859+++	2 3	630.825149 420.885858	LSKEPSISRED	1910863008
sp|P80195|GLCM1_BOVIN"	ISKEQIVIR	543.3375++ 362.5608+++	2 3	543.337498 362.560757	ISKEQIVIR	1377575616
sp|P80195|GLCM1_BOVIN"	ILNKPEDETHLEAQPTDASAQFIRNLQISNEDL	958.2125++++	4	958.212	ILNKPEDETHLEAQPTDASAQFIRNLQIS[+80]NEDL	50492924
sp|P80195|GLCM1_BOVIN"	SSRQPQSQNPKLPL	527.2899+++	3	527.29	SSRQPQSQNPKLPL	289872960
sp|P80195|GLCM1_BOVIN"	SSRQPQSQNPKLPLSILKEK	760.1008+++ 570.3274++++	3 4	760.100769 570.327396	SSRQPQSQNPKLPLSILKEK	1093218080
sp|P80195|GLCM1_BOVIN"	THLEAQPTD	506.2407++	2	506.241	THLEAQPTD	151771664
sp|P80195|GLCM1_BOVIN"	ILNKPEDETHLEAQPTDASAQFIRNLQISNEDL	938.2209++++	4	938.221	ILNKPEDETHLEAQPTDASAQFIRNLQISNEDL	53151620
sp|P80195|GLCM1_BOVIN"	ILNKPEDETHLEAQPTDAS	1054.5107++ 703.3429+++	2 3	1054.510748 703.342924	ILNKPEDETHLEAQPTDAS	754282232
sp|P80195|GLCM1_BOVIN"	DLISKEQIVIR	438.5978+++	3	438.598	DLISKEQIVIR	231548576
sp|P80195|GLCM1_BOVIN"	ILNKPEDETHLEAQPTDASAQFIRN	946.4737+++ 710.1071++++	3 4	946.47366 710.107064	ILNKPEDETHLEAQPTDASAQFIRN	1302736576
sp|P80195|GLCM1_BOVIN"	ASTTEGKLMELGHKIM	582.6357+++	3	582.636	ASTTEGKLMELGHKIM	102430880
sp|P80195|GLCM1_BOVIN"	ASAQFIRNLQISNED	853.4288++ 569.2883+++	2 3	853.428832 569.288313	ASAQFIRNLQISNED	1293817040
sp|P80195|GLCM1_BOVIN"	ETHLEAQPTDASA	685.3151++	2	685.315	ETHLEAQPTDASA	24823468
sp|P80195|GLCM1_BOVIN"	IRNLQISNE	543.7987++	2	543.799	IRNLQISNE	297607008
sp|P80195|GLCM1_BOVIN"	DLISKEQIVIR	697.3762++	2	697.376	DLIS[+80]KEQIVIR	751641344
sp|P80195|GLCM1_BOVIN"	ETHLEAQPTDASAQFIRNLQISNED	943.1213+++	3	943.121	ETHLEAQPTDASAQFIRNLQISNED	231817600
sp|P80195|GLCM1_BOVIN"	IRNLQISNEDLSKEPSISREDLISKEQIVIR	906.4995++++	4	906.5	IRNLQISNEDLSKEPSISREDLISKEQIVIR	148454368
sp|P80195|GLCM1_BOVIN"	IRNLQISNEDLSKEPSISRE	776.7433+++	3	776.743	IRNLQISNEDLSKEPSISRE	204626080
sp|P80195|GLCM1_BOVIN"	LKSLFSHAF	525.2926++ 350.5308+++	2 3	525.292559 350.530798	LKSLFSHAF	1697922688
sp|P80195|GLCM1_BOVIN"	ASAQFIR	396.7218++	2	396.722	ASAQFIR	3213774080
sp|P80195|GLCM1_BOVIN"	LNKPEDETHLEAQPTDASAQFIRNL	999.7845+++	3	999.785	LNKPEDETHLEAQPT[+80]DAS[+80]AQFIRNL	140538080
sp|P80195|GLCM1_BOVIN"	ENTVKETIKY	612.8272++	2	612.827	ENTVKETIKY	296683264
sp|P80195|GLCM1_BOVIN"	LAILNKPEDETHLEAQPTDASAQFIRNL	784.4084++++	4	784.408	LAILNKPEDETHLEAQPTDASAQFIRNL	25129062
sp|P80195|GLCM1_BOVIN"	ASAQFIRNLQISNEDLSKEPSISRE	944.8211+++ 708.8676++++	3 4	944.821059 708.867614	ASAQFIRNLQISNEDLSKEPSISRE	248694928
sp|P80195|GLCM1_BOVIN"	NEDLSKEPSISREDLISKEQIVIR	720.3694++++	4	720.369	NEDLSKEPS[+80]ISREDLISKEQIVIR	254667664
sp|P80195|GLCM1_BOVIN"	ILNKPEDETHLEAQPTDASAQFIRNLQISNE	1201.2439+++ 901.1847++++	3 4	1201.243855 901.18471	ILNKPEDETHLEAQPTDASAQFIRNLQIS[+80]NE	319142288
sp|P80195|GLCM1_BOVIN"	LNKPEDETHLEAQPTDA	636.6376+++	3	636.638	LNKPEDETHLEAQPTDA	135538672
sp|P80195|GLCM1_BOVIN"	LNKPEDETHLEAQPT	861.4207++	2	861.421	LNKPEDETHLEAQPT	135468080
sp|P80195|GLCM1_BOVIN"	LNKPEDETHLEAQPTDASAQFIRNL	1419.2069++ 946.4737+++ 710.1071++++	2 3 4	1419.206851 946.47366 710.107064	LNKPEDETHLEAQPTDASAQFIRNL	4594407780
sp|P80195|GLCM1_BOVIN"	NLQISNEDLSKEPSISRED	725.3572+++	3	725.357	NLQISNEDLSKEPSISRED	340158272
sp|P80195|GLCM1_BOVIN"	ILNKPEDETHLEAQPTDASAQFIRNLQISN	1158.2297+++	3	1158.23	ILNKPEDETHLEAQPTDASAQFIRNLQIS[+80]N	56901192
sp|P80195|GLCM1_BOVIN"	NLENTVKETIKY	484.5962+++	3	484.596	NLENTVKETIKY	129553184
sp|P80195|GLCM1_BOVIN"	SSRQPQSQNPKLPLS	833.9472++ 556.3006+++	2 3	833.947192 556.300553	SSRQPQSQNPKLPLS	1709484832
sp|P80195|GLCM1_BOVIN"	NKPEDETHLEAQPTDASAQFIRNL	908.7790+++ 681.8360++++	3 4	908.778972 681.836048	NKPEDETHLEAQPTDASAQFIRNL	286171424
sp|P80195|GLCM1_BOVIN"	KPEDETHLEAQPTDASAQF	705.3273+++	3	705.327	KPEDETHLEAQPTDASAQF	145603024
sp|P80195|GLCM1_BOVIN"	ASAQFIRNLQISNEDLSKE	721.7062+++	3	721.706	ASAQFIRNLQISNEDLSKE	183178176
sp|P80195|GLCM1_BOVIN"	LSKEPSISREDLISKE	610.9984+++ 458.5006++++	3 4	610.998429 458.50064	LSKEPSISREDLISKE	155653016
sp|P80195|GLCM1_BOVIN"	ASAQFIRNLQISNEDLSKE	748.3616+++	3	748.362	ASAQFIRNLQIS[+80]NEDLSKE	106392480
sp|P80195|GLCM1_BOVIN"	LSKEPSISRED	670.8083++	2	670.808	LSKEPS[+80]ISRED	159905696
sp|P80195|GLCM1_BOVIN"	LISKEQIVIRSS	686.9116++ 458.2768+++	2 3	686.911558 458.276798	LISKEQIVIRSS	717704496
sp|P80195|GLCM1_BOVIN"	LNKPEDETH	541.7593++	2	541.759	LNKPEDETH	14659292
sp|P80195|GLCM1_BOVIN"	KSLFSHAFEVVKT	498.2768+++	3	498.277	KSLFSHAFEVVKT	339124736
sp|P80195|GLCM1_BOVIN"	RNLENTVKETIKY	804.4412++ 536.6299+++ 402.7242++++	2 3 4	804.441211 536.6299 402.724244	RNLENTVKETIKY	1615277648
sp|P80195|GLCM1_BOVIN"	NEDLSKEPSISREDLISKEQIVIR	700.3778++++	4	700.378	NEDLSKEPSISREDLISKEQIVIR	66759676
sp|P80195|GLCM1_BOVIN"	AQPTDASAQFIR	652.8333++	2	652.833	AQPTDASAQFIR	130201392
sp|P80195|GLCM1_BOVIN"	LSKEPSISREDLISKEQIVIRSS	694.3489++++	4	694.349	LSKEPS[+80]IS[+80]REDLISKEQIVIRSS	118662824
sp|P80195|GLCM1_BOVIN"	ILNKPEDETHLEAQPTDASAQFIRNLQ	1026.8545+++ 770.3927++++	3 4	1026.85454 770.392724	ILNKPEDETHLEAQPTDASAQFIRNLQ	573529728
sp|P80195|GLCM1_BOVIN"	DETHLEAQPTD	628.2755++	2	628.275	DETHLEAQPTD	130737952
sp|P80195|GLCM1_BOVIN"	ILNKPEDETHLEAQPTDASAQFI	1284.1348++ 856.4256+++	2 3	1284.134832 856.425647	ILNKPEDETHLEAQPTDASAQFI	2066706784
sp|P80195|GLCM1_BOVIN"	ISNEDLSKEPSISREDLISKEQIVIR	750.4068++++	4	750.407	ISNEDLSKEPSISREDLISKEQIVIR	86507712
sp|P80195|GLCM1_BOVIN"	ASTTEGKLMELGHK	501.2608+++	3	501.261	ASTTEGKLMELGHK	74076624
sp|P80195|GLCM1_BOVIN"	EDLISKEQIVIR	508.2674+++	3	508.267	EDLIS[+80]KEQIVIR	54771876
sp|P80195|GLCM1_BOVIN"	ASTTEGKLMEL	598.2974++	2	598.297	ASTTEGKLM[+16]EL	136278080
sp|P80195|GLCM1_BOVIN"	ILNKPEDETHLEAQPTDASAQFIRNLQISNEDLSKEPSIS	1120.3135++++	4	1120.31	ILNKPEDETHLEAQPTDASAQFIRNLQISNEDLSKEPSIS	6565736
sp|P80195|GLCM1_BOVIN"	DLSKEPSISREDLISKEQIVIR	639.6064++++	4	639.606	DLSKEPSISREDLISKEQIVIR	51006304
sp|P80195|GLCM1_BOVIN"	SKEPSISREDLISKEQIVIR	622.5618++++	4	622.562	SKEPS[+80]IS[+80]REDLISKEQIVIR	46923416
sp|P80195|GLCM1_BOVIN"	ASTTEGKLM	469.2366++	2	469.237	ASTTEGKLM	48353288
sp|P80195|GLCM1_BOVIN"	ILNKPEDETHLEAQPTDASAQFIRNLQISNEDLSKEPSISRED	1280.3309++++	4	1280.33	ILNKPEDETHLEAQPT[+80]DASAQFIRNLQISNEDLSKEPS[+80]IS[+80]RED	77246912
sp|P80195|GLCM1_BOVIN"	ETHLEAQPTDASAQ	749.3444++	2	749.344	ETHLEAQPTDASAQ	34132820
sp|P80457|XDH_BOVIN"	PTYTSATLLFQKD	742.8852++	2	742.885	PTYTSATLLFQKD	168452912
sp|P81265|PIGR_BOVIN"	PSFFAKESVKDAAGGPGAPAD	1009.9945++ 673.6654+++	2 3	1009.994536 673.66545	PSFFAKESVKDAAGGPGAPAD	56324623360
sp|P81265|PIGR_BOVIN"	AAGGPGAPADPGRPTGYSGS	871.9083++	2	871.908	AAGGPGAPADPGRPTGYSGS	1599721472
sp|P81265|PIGR_BOVIN"	FAKESVKDAAGGPGAPAD	844.4179++ 563.2810+++	2 3	844.417933 563.281047	FAKESVKDAAGGPGAPAD	10745541120
sp|P81265|PIGR_BOVIN"	PGRPTGYSGSSKA	632.8177++ 422.2142+++	2 3	632.817658 422.214197	PGRPTGYSGSSKA	60859714560
sp|P81265|PIGR_BOVIN"	AGEIQNKALLD	586.3195++	2	586.32	AGEIQNKALLD	89464217600
sp|P81265|PIGR_BOVIN"	PGRPTGYSGSSKALVST	832.9338++ 555.6249+++	2 3	832.93375 555.624926	PGRPTGYSGSSKALVST	23543930112
sp|P81265|PIGR_BOVIN"	PAQASHAHVY	540.7647++ 360.8456+++	2 3	540.764697 360.845557	PAQASHAHVY	17519649792
sp|P81265|PIGR_BOVIN"	ALLDPSFFAKESVKD	833.9380++ 556.2944+++	2 3	833.93797 556.294405	ALLDPSFFAKESVKD	6895384576
sp|P81265|PIGR_BOVIN"	AAGGPGAPADPGRPTGYSGSSKALVSTLVPLA	974.8488+++	3	974.849	AAGGPGAPADPGRPTGYSGSSKALVSTLVPLA	9261958144
sp|P81265|PIGR_BOVIN"	ALLDPSFFAKESVKDAAGGPGAPAD	1216.1106++ 811.0762+++	2 3	1216.110629 811.076178	ALLDPSFFAKESVKDAAGGPGAPAD	11027710720
sp|P81265|PIGR_BOVIN"	PGRPTGYSGS	489.7356++	2	489.736	PGRPTGYSGS	17251391488
sp|P81265|PIGR_BOVIN"	FAKESVKD	462.2453++	2	462.245	FAKESVKD	382515808
sp|P81265|PIGR_BOVIN"	PGRPTGYSGSSKAL	689.3597++ 459.9089+++	2 3	689.35969 459.908885	PGRPTGYSGSSKAL	24922511872
sp|P81265|PIGR_BOVIN"	AKESVKDAAGGPGAPAD	770.8837++ 514.2582+++	2 3	770.883726 514.258243	AKESVKDAAGGPGAPAD	4361052672
sp|P81265|PIGR_BOVIN"	AAGGPGAPADPGRPTGY	756.3655++	2	756.366	AAGGPGAPADPGRPTGY	615869696
sp|P81265|PIGR_BOVIN"	PGRPTGYSGSSKALVSTLVPLA	1079.5970++ 720.0671+++ 540.3021++++	2 3 4	1079.59696 720.067066 540.302118	PGRPTGYSGSSKALVSTLVPLA	181899157504
sp|P81265|PIGR_BOVIN"	FAKESVKDAAGGPGAPADPGRPTGYSGSSKA	978.4844+++ 734.1152++++	3 4	978.484447 734.115154	FAKESVKDAAGGPGAPADPGRPTGYSGSSKA	6059087744
sp|P81265|PIGR_BOVIN"	PGRPTGYSGSSKALVSTLVPL	1044.0784++ 696.3880+++ 522.5428++++	2 3 4	1044.078403 696.388028 522.54284	PGRPTGYSGSSKALVSTLVPL	100343133696
sp|P81265|PIGR_BOVIN"	AGEIQNKALLDPSFFAKESVK	764.7460+++	3	764.746	AGEIQNKALLDPSFFAKESVK	174375792
sp|P81265|PIGR_BOVIN"	ALLDPSFFAKESVKDAAGGPGAPADPGRPTGYSGSSKA	1226.2796+++ 919.9615++++	3 4	1226.279578 919.961502	ALLDPSFFAKESVKDAAGGPGAPADPGRPTGYSGSSKA	1340772176
sp|P81265|PIGR_BOVIN"	AAGGPGAPADPGRPTGYSGSSKA	1014.9903++ 676.9960+++	2 3	1014.990317 676.99597	AAGGPGAPADPGRPTGYSGSSKA	7002426080
sp|P81265|PIGR_BOVIN"	PGRPTGYSGSS	533.2516++	2	533.252	PGRPTGYSGSS	3653622272
sp|P81265|PIGR_BOVIN"	PGRPTGY	374.1928++	2	374.193	PGRPTGY	5464032256
sp|P81265|PIGR_BOVIN"	AAGGPGAPADPGRPT	646.3231++	2	646.323	AAGGPGAPADPGRPT	333472960
sp|P81265|PIGR_BOVIN"	FFAKESVKD	535.7795++	2	535.779	FFAKESVKD	295512128
sp|P81265|PIGR_BOVIN"	AAPAGAAIQSRAGEIQNKALLD	1083.0873++	2	1083.09	AAPAGAAIQSRAGEIQNKALLD	438580096
sp|P81265|PIGR_BOVIN"	PSFFAKESVKDAAGGPGAPADPGRPTGYSGSSKA	1088.8688+++ 816.9035++++	3 4	1088.868849 816.903456	PSFFAKESVKDAAGGPGAPADPGRPTGYSGSSKA	5233018304
sp|P81265|PIGR_BOVIN"	ALLDPSFFAKESVKDAAGGPGAPADPGRPTGY	790.6491++++	4	790.649	ALLDPSFFAKESVKDAAGGPGAPADPGRPTGY	129681520
sp|P81265|PIGR_BOVIN"	FFAKESVKDAAGGPGAPAD	917.9521++ 612.3039+++	2 3	917.95214 612.303852	FFAKESVKDAAGGPGAPAD	2880183552
sp|P81265|PIGR_BOVIN"	YSGSSKALVSTLVPLA	796.9483++	2	796.948	YSGSSKALVSTLVPLA	153970816
sp|P81265|PIGR_BOVIN"	ALLDPSFFAKESVKDAAGGPGAPADPGRPTGYSGS	1130.8915+++ 848.4205++++	3 4	1130.891542 848.420476	ALLDPSFFAKESVKDAAGGPGAPADPGRPTGYSGS	1385825088
sp|P81265|PIGR_BOVIN"	LDPSFFAKESVKDAAGGPGAPAD	1124.0500++ 749.7025+++	2 3	1124.05004 749.702452	LDPSFFAKESVKDAAGGPGAPAD	3658631680
sp|P81265|PIGR_BOVIN"	PGRPTGYSGSSK	597.2991++ 398.5352+++	2 3	597.299101 398.535159	PGRPTGYSGSSK	3161281600
sp|P81265|PIGR_BOVIN"	AAGGPGAPADPGRPTG	674.8338++	2	674.834	AAGGPGAPADPGRPTG	151740544
sp|P81265|PIGR_BOVIN"	PSFFAKESVKDAAGGPGAPA	952.4811++ 635.3231+++	2 3	952.481065 635.323135	PSFFAKESVKDAAGGPGAPA	977921296
sp|P81265|PIGR_BOVIN"	AGEIQNKALLDPSF	751.8961++	2	751.896	AGEIQNKALLDPSF	548918912
sp|P81265|PIGR_BOVIN"	ESVKDAAGGPGAPAD	671.3177++	2	671.318	ESVKDAAGGPGAPAD	227386560
sp|P81265|PIGR_BOVIN"	AAGGPGAPADPGRPTGYSGSSK	653.3169+++	3	653.317	AAGGPGAPADPGRPTGYSGSSK	320574912
sp|P81265|PIGR_BOVIN"	PSFFAKESVKD	627.8219++ 418.8837+++	2 3	627.821878 418.883677	PSFFAKESVKD	4708083968
sp|P81265|PIGR_BOVIN"	PGAPADPGRPTGYSGSSKA	591.6236+++	3	591.624	PGAPADPGRPTGYSGSSKA	162553200
sp|P81265|PIGR_BOVIN"	AGEIQNKALLDPSFFAKESVKDAAGGPGAPADPGRPTGYSGS	1033.5159++++	4	1033.52	AGEIQNKALLDPSFFAKESVKDAAGGPGAPADPGRPTGYSGS	780596352
sp|P81265|PIGR_BOVIN"	PGRPTGYSGSSKALVSTLVPLALV	790.7846+++	3	790.785	PGRPTGYSGSSKALVSTLVPLALV	185350784
sp|P81265|PIGR_BOVIN"	AKESVKDAAGGPGAPADPGRPTGYSGS	834.0736+++ 625.8070++++	3 4	834.073607 625.807025	AKESVKDAAGGPGAPADPGRPTGYSGS	216696376
sp|P81265|PIGR_BOVIN"	FFAKESVKDAAGGPGAPADPGRPTGYSGSSKA	1027.5073+++	3	1027.51	FFAKESVKDAAGGPGAPADPGRPTGYSGSSKA	881966720
sp|P81265|PIGR_BOVIN"	AGEIQNKALLDPSFFAKESVKDAAGGPGAPADPGRPTGYSG	1011.7579++++	4	1011.76	AGEIQNKALLDPSFFAKESVKDAAGGPGAPADPGRPTGYSG	38742500
sp|P81265|PIGR_BOVIN"	AGEIQNKALLDPSFFAKESVKDAAGGPGAPA	764.8976++++	4	764.898	AGEIQNKALLDPSFFAKESVKDAAGGPGAPA	504894912
sp|P81265|PIGR_BOVIN"	SVKDAAGGPGAPAD	606.7964++	2	606.796	SVKDAAGGPGAPAD	460606336
sp|P81265|PIGR_BOVIN"	RPTGYSGSSKALVSTLVPLA	668.7090+++	3	668.709	RPTGYSGSSKALVSTLVPLA	229772656
sp|P81265|PIGR_BOVIN"	AAGGPGAPADPGRPTGYSGSS	915.4243++	2	915.424	AAGGPGAPADPGRPTGYSGSS	276974464
sp|P81265|PIGR_BOVIN"	PGAPADPGRPTGYSGS	743.8497++	2	743.85	PGAPADPGRPTGYSGS	42582052
sp|P81265|PIGR_BOVIN"	VKDAAGGPGAPAD	563.2804++	2	563.28	VKDAAGGPGAPAD	104193248
sp|P81265|PIGR_BOVIN"	AGEIQNKALLDPSFFAKE	660.0142+++	3	660.014	AGEIQNKALLDPSFFAKE	106708168
sp|P81265|PIGR_BOVIN"	LLDPSFFAKESVKDAAGGPGAPAD	1180.5921++ 787.3971+++	2 3	1180.592072 787.39714	LLDPSFFAKESVKDAAGGPGAPAD	1429861696
sp|P81265|PIGR_BOVIN"	AKESVKDAAGGPGAPADPGRPTGYSGSSKALVSTLVPLA	1227.3145+++ 920.7377++++	3 4	1227.314511 920.737702	AKESVKDAAGGPGAPADPGRPTGYSGSSKALVSTLVPLA	1163144624
sp|P81265|PIGR_BOVIN"	AGEIQNKALLDPSFFAKESVKDAA	850.4464+++	3	850.446	AGEIQNKALLDPSFFAKESVKDAA	97216384
sp|P81265|PIGR_BOVIN"	AKESVKDAAGGPGAPADPGRPTGYSGSSKA	929.4616+++ 697.3481++++	3 4	929.461643 697.348051	AKESVKDAAGGPGAPADPGRPTGYSGSSKA	625591264
sp|P81265|PIGR_BOVIN"	FAKESVKDAAGGPGAPADPGRPTGYSGSS	684.3321++++	4	684.332	FAKESVKDAAGGPGAPADPGRPTGYSGSS	75563952
sp|P81265|PIGR_BOVIN"	LLDPSFFAKESVKD	532.6154+++	3	532.615	LLDPSFFAKESVKD	201374432
sp|P81265|PIGR_BOVIN"	RPTGYSGSSKALVSTLVPL	645.0300+++	3	645.03	RPTGYSGSSKALVSTLVPL	126972376
sp|P81265|PIGR_BOVIN"	PSFFAKESVKDAAGGPGAPADPGRPTGYSGS	993.4808+++ 745.3624++++	3 4	993.480814 745.36243	PSFFAKESVKDAAGGPGAPADPGRPTGYSGS	2900599552
sp|P81265|PIGR_BOVIN"	AGEIQNKALLDPSFFAKESVKD	1204.1288++ 803.0883+++ 602.5680++++	2 3 4	1204.128822 803.088306 602.568049	AGEIQNKALLDPSFFAKESVKD	13923817376
sp|P81265|PIGR_BOVIN"	ALLDPSFFAKESVKDAAGGPGAPADPGRPT	735.6279++++	4	735.628	ALLDPSFFAKESVKDAAGGPGAPADPGRPT	105226912
sp|P81265|PIGR_BOVIN"	AGEIQNKALL	528.8060++	2	528.806	AGEIQNKALL	1796048000
sp|P81265|PIGR_BOVIN"	PGRPTGYSGSSKALV	738.8939++ 492.9317+++	2 3	738.893897 492.93169	PGRPTGYSGSSKALV	740225984
sp|P81265|PIGR_BOVIN"	PSFFAKESVKDAAGGPGAPADPGRPTGYSGSS	1022.4915+++ 767.1204++++	3 4	1022.49149 767.120437	PSFFAKESVKDAAGGPGAPADPGRPTGYSGSS	429092448
sp|P81265|PIGR_BOVIN"	SGSSKALVSTLVPLA	715.4167++	2	715.417	SGSSKALVSTLVPLA	203602816
sp|P81265|PIGR_BOVIN"	AGEIQNKALLDPSFFAKESVKDAAGGPGAPADPGRPTGYSGSSKA	1105.0569++++	4	1105.06	AGEIQNKALLDPSFFAKESVKDAAGGPGAPADPGRPTGYSGSSKA	762869504
sp|P81265|PIGR_BOVIN"	AKESVKDAAGGPGAPADPGRPTGYSGSSKALVST	797.4061++++	4	797.406	AKESVKDAAGGPGAPADPGRPTGYSGSSKALVST	129376128
sp|P81265|PIGR_BOVIN"	GGPGAPADPGRPTGYSGSSKA	629.6379+++	3	629.638	GGPGAPADPGRPTGYSGSSKA	68293168
sp|P81265|PIGR_BOVIN"	SGSSKALVSTLVPL	679.8981++	2	679.898	SGSSKALVSTLVPL	231300032
sp|P81265|PIGR_BOVIN"	PGRPTGYSGSSKALVSTLVPLAL	757.7618+++ 568.5731++++	3 4	757.761754 568.573134	PGRPTGYSGSSKALVSTLVPLAL	2193399104
sp|P81265|PIGR_BOVIN"	PSFFAKESVKDAAGGPGAPADPGRPT	843.0907+++	3	843.091	PSFFAKESVKDAAGGPGAPADPGRPT	407521088
sp|P81265|PIGR_BOVIN"	PTGYSGSSKALVSTLVPLA	924.5093++	2	924.509	PTGYSGSSKALVSTLVPLA	28621496
sp|P81265|PIGR_BOVIN"	FAKESVKDAAGGPGAPADPGRPTGYSGSSKALVSTLVPLA	1276.3373+++ 957.5048++++	3 4	1276.337315 957.504806	FAKESVKDAAGGPGAPADPGRPTGYSGSSKALVSTLVPLA	907322448
sp|P81265|PIGR_BOVIN"	GPGAPADPGRPTGYSGSSKA	610.6307+++	3	610.631	GPGAPADPGRPTGYSGSSKA	113980536
sp|P81265|PIGR_BOVIN"	PGRPTGYSGSSKALVS	521.9424+++	3	521.942	PGRPTGYSGSSKALVS	1082875392
sp|P81265|PIGR_BOVIN"	AGEIQNKALLDPSFFAKESVKDAAGGPGAPAD	1586.3015++ 1057.8701+++ 793.6544++++	2 3 4	1586.30148 1057.870079 793.654378	AGEIQNKALLDPSFFAKESVKDAAGGPGAPAD	50646679064
sp|P81265|PIGR_BOVIN"	PGRPTGYSGSSKALVSTL	889.4758++ 593.3196+++	2 3	889.475782 593.319614	PGRPTGYSGSSKALVSTL	855263592
sp|P81265|PIGR_BOVIN"	IQSRAGEIQNKALLDPSFFAKESVKDAAGGPGAPAD	914.7233++++	4	914.723	IQSRAGEIQNKALLDPSFFAKESVKDAAGGPGAPAD	71094664
sp|P81265|PIGR_BOVIN"	FAKESVKDAAGGPGAPADPGRPT	732.7063+++	3	732.706	FAKESVKDAAGGPGAPADPGRPT	60922356
sp|P81265|PIGR_BOVIN"	AGEIQNKALLDPSFFAKESVKDAAG	869.4535+++ 652.3420++++	3 4	869.453537 652.341972	AGEIQNKALLDPSFFAKESVKDAAG	361689616
sp|P81265|PIGR_BOVIN"	KESVKDAAGGPGAPADPGRPTGYSGSSKA	905.7826+++ 679.5888++++	3 4	905.782605 679.588772	KESVKDAAGGPGAPADPGRPTGYSGSSKA	236978272
sp|P81265|PIGR_BOVIN"	AAGGPGAPADPGRPTGYSG	828.3922++	2	828.392	AAGGPGAPADPGRPTGYSG	151740928
sp|P81265|PIGR_BOVIN"	AAGGPGAPADPGRPTGYSGSSKAL	1071.5323++ 714.6907+++	2 3	1071.532349 714.690658	AAGGPGAPADPGRPTGYSGSSKAL	1617252696
sp|P81265|PIGR_BOVIN"	ALLDPSFFAKESVKDAAGGPG	693.0249+++	3	693.025	ALLDPSFFAKESVKDAAGGPG	49051824
sp|P81265|PIGR_BOVIN"	PGRPTGYSGSSKALVSTLVP	658.6933+++ 494.2718++++	3 4	658.69334 494.271824	PGRPTGYSGSSKALVSTLVP	11064903472
sp|P81265|PIGR_BOVIN"	SSKALVSTLVPLA	643.3899++	2	643.39	SSKALVSTLVPLA	233896720
sp|P81265|PIGR_BOVIN"	AGEIQNKALLDPSFF	825.4303++	2	825.43	AGEIQNKALLDPSFF	64143280
sp|P81265|PIGR_BOVIN"	PSFFAKESVKDAAGGPGAPADPGRPTGYSGSSKAL	1126.5635+++ 845.1745++++	3 4	1126.563537 845.174472	PSFFAKESVKDAAGGPGAPADPGRPTGYSGSSKAL	914695632
sp|P81265|PIGR_BOVIN"	PSFFAKESVKDAAGGPGAPADPGRPTGY	916.4523+++ 687.5910++++	3 4	916.452307 687.591049	PSFFAKESVKDAAGGPGAPADPGRPTGY	590545152
sp|P81265|PIGR_BOVIN"	FAKESVKDAAGGPGAPADPGRPTGYSGSSKALVSTLVPL	1252.6583+++ 939.7455++++	3 4	1252.658277 939.745527	FAKESVKDAAGGPGAPADPGRPTGYSGSSKALVSTLVPL	601895144
sp|P81265|PIGR_BOVIN"	PSFFAKESVKDAAG	727.3697++ 485.2489+++	2 3	727.369723 485.248908	PSFFAKESVKDAAG	293400672
sp|P81265|PIGR_BOVIN"	APADPGRPTGYSGSSKA	540.2655+++	3	540.266	APADPGRPTGYSGSSKA	58085096
sp|P81265|PIGR_BOVIN"	ALLDPSFFAKESVKDAAGGPGAPADPGRPTGYSGSSKALVST	1020.0195++++	4	1020.02	ALLDPSFFAKESVKDAAGGPGAPADPGRPTGYSGSSKALVST	167020000
sp|P81265|PIGR_BOVIN"	AGEIQNKALLDPSFFAKESVKDA	826.7673+++	3	826.767	AGEIQNKALLDPSFFAKESVKDA	36773880
sp|P81265|PIGR_BOVIN"	AAGGPGAPADPGRPTGYSGSSKALVSTLVPL	1426.2511++	2	1426.25	AAGGPGAPADPGRPTGYSGSSKALVSTLVPL	77125880
sp|P81265|PIGR_BOVIN"	PSFFAKESVK	570.3084++ 380.5414+++	2 3	570.308406 380.541363	PSFFAKESVK	263838368
sp|P81265|PIGR_BOVIN"	AAPAGAAIQSRAGEIQN	812.9237++	2	812.924	AAPAGAAIQSRAGEIQN	109696704
sp|P81265|PIGR_BOVIN"	ALLDPSFFAKESVKDAAG	933.4858++ 622.6596+++	2 3	933.485816 622.659636	ALLDPSFFAKESVKDAAG	183090100
sp|P81265|PIGR_BOVIN"	VKDAAGGPGAPADPGRPTGYSGSSKA	593.5464++++	4	593.546	VKDAAGGPGAPADPGRPTGYSGSSKA	22641324
sp|P81265|PIGR_BOVIN"	FAKESVKDAAGGPGAPADPGRPTGYSGSSKALVST	1111.8952+++ 834.1732++++	3 4	1111.895176 834.173201	FAKESVKDAAGGPGAPADPGRPTGYSGSSKALVST	398232680
sp|P81265|PIGR_BOVIN"	ALLDPSFFAKESVKDAA	904.9751++ 603.6525+++	2 3	904.975084 603.652481	ALLDPSFFAKESVKDAA	91408054
sp|P81265|PIGR_BOVIN"	VSLEVSQDPAQASHAHVY	969.4712++ 646.6499+++	2 3	969.471228 646.649911	VSLEVSQDPAQASHAHVY	484309904
sp|P81265|PIGR_BOVIN"	AKESVKDAAGGPGAPADPGRPTGYSGSSKAL	725.6191++++	4	725.619	AKESVKDAAGGPGAPADPGRPTGYSGSSKAL	113224880
sp|P81265|PIGR_BOVIN"	FAKESVKDAAGGPGAPADPGRPTGYSGS	883.0964+++	3	883.096	FAKESVKDAAGGPGAPADPGRPTGYSGS	178044544
sp|P81265|PIGR_BOVIN"	SVKDAAGGPGAPADPGRPTGYSGSSKA	820.0701+++ 615.3044++++	3 4	820.070086 615.304383	SVKDAAGGPGAPADPGRPTGYSGSSKA	96473420
sp|P81265|PIGR_BOVIN"	KALLDPSFFAKESVKDAAGGPGAPAD	853.7745+++ 640.5827++++	3 4	853.774499 640.582693	KALLDPSFFAKESVKDAAGGPGAPAD	181994664
sp|P81265|PIGR_BOVIN"	KESVKDAAGGPGAPAD	735.3652++	2	735.365	KESVKDAAGGPGAPAD	65499180
sp|P81265|PIGR_BOVIN"	SRAGEIQNKALLDPSFFAKESVKDAAGGPGAPAD	1138.9145+++	3	1138.91	SRAGEIQNKALLDPSFFAKESVKDAAGGPGAPAD	124995960
sp|P81265|PIGR_BOVIN"	FFAKESVKDAAGGPGAPADPGRPTGYSGSSKALVST	870.9403++++	4	870.94	FFAKESVKDAAGGPGAPADPGRPTGYSGSSKALVST	91763312
sp|P81265|PIGR_BOVIN"	FAKESVKDAAGG	590.3039++	2	590.304	FAKESVKDAAGG	22378910
sp|P81265|PIGR_BOVIN"	ALLDPSFFAKE	619.3268++	2	619.327	ALLDPSFFAKE	60553008
sp|P81265|PIGR_BOVIN"	AGGPGAPADPGRPTGYSGSSKA	653.3169+++	3	653.317	AGGPGAPADPGRPTGYSGSSKA	62725000
sp|P81265|PIGR_BOVIN"	LDPSFFAKESVKD	494.9207+++	3	494.921	LDPSFFAKESVKD	40554508
sp|P81265|PIGR_BOVIN"	ESVKDAAGGPGAPADPGRPTGYSGSSKA	863.0843+++	3	863.084	ESVKDAAGGPGAPADPGRPTGYSGSSKA	43752488
sp|P81265|PIGR_BOVIN"	LDPSFFAKESVKDAAGGPGAPADPGRPTGYSGSSKA	873.9312++++	4	873.931	LDPSFFAKESVKDAAGGPGAPADPGRPTGYSGSSKA	251712992
sp|P81265|PIGR_BOVIN"	FAKESVKDAAG	561.7931++	2	561.793	FAKESVKDAAG	27871160
sp|P81265|PIGR_BOVIN"	DAAGGPGAPADPGRPTGYSGSSKA	715.3383+++	3	715.338	DAAGGPGAPADPGRPTGYSGSSKA	51553056
sp|P81265|PIGR_BOVIN"	FAKESVKDAAGGPGAPADPGRPTGYSGSSKAL	762.3862++++	4	762.386	FAKESVKDAAGGPGAPADPGRPTGYSGSSKAL	124155488
sp|P81265|PIGR_BOVIN"	LLDPSFFAKESVKDAAGGPGAPADPGRPTGYSGSSKA	902.2022++++	4	902.202	LLDPSFFAKESVKDAAGGPGAPADPGRPTGYSGSSKA	876692992
sp|P81265|PIGR_BOVIN"	AKESVKD	388.7111++	2	388.711	AKESVKD	19281904
sp|P81265|PIGR_BOVIN"	PGRPTGYSGSSKALVSTLVPLALVL	828.4792+++	3	828.479	PGRPTGYSGSSKALVSTLVPLALVL	36779936
sp|P81265|PIGR_BOVIN"	ALLDPSFFAKESVKDA	579.9734+++	3	579.973	ALLDPSFFAKESVKDA	24719346
sp|Q28125|ICAM3_BOVIN"	LISLETALS	473.7764++	2	473.776	LISLETALS	580216192
sp|Q3ZCH5|ZA2G_BOVIN"	SLTRPLTVPWDPRQQAE	665.3533+++	3	665.353	SLTRPLTVPWDPRQQAE	201082048
sp|Q3ZCH5|ZA2G_BOVIN"	KEIPAWVPLD	584.3241++	2	584.324	KEIPAWVPLD	287558560
sp|Q3ZCH5|ZA2G_BOVIN"	GQDFIKFDKEIPAWVPLD	706.7017+++	3	706.702	GQDFIKFDKEIPAWVPLD	22384676
sp|Q687Y7|IL17_BOVIN"	IIPQSPGCPPTE	619.8079++	2	619.808	IIPQSPGCPPTE	1811508736
sp|Q76LV1|HS90B_BOVIN"	DDEEKPKI	487.2455++	2	487.245	DDEEKPKI	18685302
sp|Q865B7|PRGC1_BOVIN"	ILVSTSQELHD	621.3222++	2	621.322	ILVSTSQELHD	1080630272
sp|Q8MI01|MUC15_BOVIN"	YDDRNEPVLR	426.2142+++	3	426.214	YDDRNEPVLR	49913128
sp|Q8MI01|MUC15_BOVIN"	IPPLRTSV	441.7740++	2	441.774	IPPLRTSV	525035968
sp|Q95114|MFGM_BOVIN"	PGASESKIFPGNMDNNSHK	512.2391++++	4	512.239	PGASESKIFPGNM[+16]DNNSHK	35029284
sp|Q95JH2|PLCA_BOVIN"	GRGGGDYLKKPGGVGEAGL	596.6515+++	3	596.651	GRGGGDYLKKPGGVGEAGL	61526688
sp|Q95KV1|IKKA_BOVIN"	IIVHTVQSQD	570.3064++	2	570.306	IIVHTVQSQD	139439792
sp|Q95M18|ENPL_BOVIN"	LLPDTKAYG	489.2687++	2	489.269	LLPDTKAYG	907149440
sp|Q9MZ06|FGFP1_BOVIN"	PQCEEEDLKNQ	666.7904++	2	666.79	PQCEEEDLKNQ	529801312
sp|Q9MZ06|FGFP1_BOVIN"	RGSKASADESLALGKPGKEPR	718.7257+++ 539.2961++++	3 4	718.725702 539.296096	RGSKASADESLALGKPGKEPR	3151950784
sp|Q9MZ06|FGFP1_BOVIN"	RGSKASADESLALGKPGKEP	666.6920+++ 500.2708++++	3 4	666.691999 500.270818	RGSKASADESLALGKPGKEP	947420928
sp|Q9MZ06|FGFP1_BOVIN"	ASADESLALGKPGKEPR	575.9758+++ 432.2337++++	3 4	575.975847 432.233704	ASADESLALGKPGKEPR	1685779648
sp|Q9MZ06|FGFP1_BOVIN"	PQCEEEDLKNQRK	404.9479++++	4	404.948	PQCEEEDLKNQRK	39252704
sp|Q9MZ06|FGFP1_BOVIN"	NRRGSKASADESLALGKPGKEP	567.8068++++	4	567.807	NRRGSKASADESLALGKPGKEP	301849664
sp|Q9MZ06|FGFP1_BOVIN"	GSKASADESLALGKPGKEP	614.6583+++	3	614.658	GSKASADESLALGKPGKEP	370691168
sp|Q9MZ06|FGFP1_BOVIN"	ESLALGKPGKEPR	461.2648+++	3	461.265	ESLALGKPGKEPR	204348384
sp|Q9MZ06|FGFP1_BOVIN"	GSKASADESLALGKPGKEPR	999.5344++ 666.6920+++ 500.2708++++	2 3 4	999.53436 666.691999 500.270818	GSKASADESLALGKPGKEPR	8195720872
sp|Q9MZ06|FGFP1_BOVIN"	SQPTNYPIKGKFVTPDHAD	705.6884+++ 529.5181++++	3 4	705.688366 529.518093	SQPTNYPIKGKFVTPDHAD	638069456
sp|Q9MZ06|FGFP1_BOVIN"	PQCEEEDLK	545.7397++	2	545.74	PQCEEEDLK	283171744
sp|Q9MZ06|FGFP1_BOVIN"	ADESLALGKPGKEPR	392.7164++++	4	392.716	ADESLALGKPGKEPR	62836184
sp|Q9MZ06|FGFP1_BOVIN"	SADESLALGKPGKEPR	552.2968+++	3	552.297	SADESLALGKPGKEPR	87982320
sp|Q9MZ06|FGFP1_BOVIN"	NRRGSKASADESLALGKPGKEPR	606.8321++++	4	606.832	NRRGSKASADESLALGKPGKEPR	109983920
sp|Q9TUM6|PLIN2_BOVIN" tr|A1L5C2|A1L5C2_BOVIN"	EEAKRKGQETISQLH	585.3112+++	3	585.311	EEAKRKGQETISQLH	204356976
sp|Q9TUM6|PLIN2_BOVIN" tr|A1L5C2|A1L5C2_BOVIN"	AVTTTVTGAKD	532.2851++	2	532.285	AVTTTVTGAKD	82855800
sp|Q9TUM6|PLIN2_BOVIN" tr|A1L5C2|A1L5C2_BOVIN"	AVTTTVTGAKDSVASTITGVVDRTKGAVTG	716.6397++++	4	716.64	AVTTTVTGAKDSVASTITGVVDRTKGAVTG	22274768
sp|Q9TUM6|PLIN2_BOVIN" tr|A1L5C2|A1L5C2_BOVIN"	VVDRTKGAVTGSVEKTKSVVSG	735.4130+++	3	735.413	VVDRTKGAVTGSVEKTKSVVSG	107681264
sp|Q9TUM6|PLIN2_BOVIN" tr|A1L5C2|A1L5C2_BOVIN"	VEEAKRKGQETISQLH	618.3340+++ 464.0023++++	3 4	618.334034 464.002345	VEEAKRKGQETISQLH	752809120
sp|Q9TUM6|PLIN2_BOVIN" tr|A1L5C2|A1L5C2_BOVIN"	HPKPVPVSNAEGSQPDDSSS	678.9836+++	3	678.984	HPKPVPVSNAEGSQPDDSSS	42013348
sp|Q9TUM6|PLIN2_BOVIN" tr|A1L5C2|A1L5C2_BOVIN"	AVTTTVTGAKDSVA	660.8539++	2	660.854	AVTTTVTGAKDSVA	70021648
sp|Q9TUM6|PLIN2_BOVIN" tr|A1L5C2|A1L5C2_BOVIN"	LPIIQKLEPQIA	681.9214++	2	681.921	LPIIQKLEPQIA	380459488
sp|Q9TUM6|PLIN2_BOVIN" tr|A1L5C2|A1L5C2_BOVIN"	ALPIIQKLEPQIA	717.4400++	2	717.44	ALPIIQKLEPQIA	66184552
sp|Q9TUM6|PLIN2_BOVIN" tr|A1L5C2|A1L5C2_BOVIN"	MVQKPSYY	508.2495++	2	508.25	MVQKPSYY	122119320
sp|Q9TUM6|PLIN2_BOVIN" tr|A1L5C2|A1L5C2_BOVIN"	KHPKPVPVSNAEGSQPDDSSS	721.6819+++	3	721.682	KHPKPVPVSNAEGSQPDDSSS	45242980
sp|Q9TUM6|PLIN2_BOVIN" tr|A1L5C2|A1L5C2_BOVIN"	VVDRTKGAVTGSVEKTK	592.3389+++	3	592.339	VVDRTKGAVTGSVEKTK	18351918
sp|Q9TUM6|PLIN2_BOVIN" tr|A1L5C2|A1L5C2_BOVIN"	AKDAVTTTVTGAKD	689.3646++ 459.9122+++	2 3	689.364638 459.912184	AKDAVTTTVTGAKD	48907416
sp|Q9TUM6|PLIN2_BOVIN" tr|A1L5C2|A1L5C2_BOVIN"	RTKGAVTGSVEK	411.5701+++	3	411.57	RTKGAVTGSVEK	13650288
sp|Q9TUM6|PLIN2_BOVIN" tr|A1L5C2|A1L5C2_BOVIN"	GAMTGAKDAVTTTVTGAKD	604.2999+++	3	604.3	GAM[+16]TGAKDAVTTTVTGAKD	68749368
sp|Q9TUM6|PLIN2_BOVIN" tr|A1L5C2|A1L5C2_BOVIN"	RVEEAKRKGQETISQLHSA	542.5449++++	4	542.545	RVEEAKRKGQETISQLHSA	34852524
tr|A1L598|A1L598_BOVIN"	TSTALDRVAK	531.3011++	2	531.301	TSTALDRVAK	85406624
tr|A5D9B6|A5D9B6_BOVIN"	VILCKDQDGKI	616.3394++	2	616.339	VILCKDQDGKI	38117544
tr|B5B3R8|B5B3R8_BOVIN"	APSFSDIPNPIGSENSGKTTMPLW	1281.6127++ 854.7442+++	2 3	1281.612679 854.744211	APSFSDIPNPIGSENSGKTTM[+16]PLW	204292072
tr|B5B3R8|B5B3R8_BOVIN"	IPNPIGSENSGKTTMPLW	971.4906++	2	971.491	IPNPIGSENSGKTTMPLW	130755024
tr|B5B3R8|B5B3R8_BOVIN"	DIPNPIGSENSGKTTMPLW	1029.0040++	2	1029	DIPNPIGSENSGKTTMPLW	45268072
tr|B5B3R8|B5B3R8_BOVIN"	SDIPNPIGSENSGKTTMPLW	715.3491+++	3	715.349	SDIPNPIGSENSGKTTMPLW	127513528
tr|B5B3R8|B5B3R8_BOVIN"	TQYTDAPSFSDIPNPIGSENSGKTTMPLW	1057.4923+++	3	1057.49	TQYTDAPSFSDIPNPIGSENSGKTTM[+16]PLW	25735184
tr|B5B3R8|B5B3R8_BOVIN"	TDAPSFSDIPNPIGSENSGKTTMPLW	921.4374+++	3	921.437	TDAPSFSDIPNPIGSENSGKTTMPLW	65805456
tr|B5B3R8|B5B3R8_BOVIN"	NPIGSENSGKTT	602.7938++	2	602.794	NPIGSENSGKTT	17854872
tr|B5B3R8|B5B3R8_BOVIN"	APSFSDIPNPIGSENSGKTTMPLW	1273.6152++ 849.4126+++	2 3	1273.615221 849.412573	APSFSDIPNPIGSENSGKTTMPLW	227755448
tr|B5B3R8|B5B3R8_BOVIN"	SDIPNPIGSENSGKTTMPLW	1080.5175++ 720.6808+++	2 3	1080.517518 720.680771	SDIPNPIGSENSGKTTM[+16]PLW	660411072
tr|B5B3R8|B5B3R8_BOVIN"	TDAPSFSDIPNPIGSENSGKTTMPLW	926.7691+++	3	926.769	TDAPSFSDIPNPIGSENSGKTTM[+16]PLW	83536856
tr|B5B3R8|B5B3R8_BOVIN"	DIPNPIGSENSGKTTMPLW	1037.0015++	2	1037	DIPNPIGSENSGKTTM[+16]PLW	65380808
tr|B5B3R8|B5B3R8_BOVIN"	IPNPIGSENSGKTTMPLW	653.3278+++	3	653.328	IPNPIGSENSGKTTM[+16]PLW	91535952
tr|E1B8X8|E1B8X8_BOVIN"	LIPSNDGKAG	486.2615++	2	486.261	LIPSNDGKAG	893563392
tr|F1MDE1|F1MDE1_BOVIN"	SPDIILPIHS	546.3084++	2	546.308	SPDIILPIHS	7574706176
tr|Q0VC14|Q0VC14_BOVIN"	LLPHLSGLD	482.7767++	2	482.777	LLPHLSGLD	845657600
tr|Q3ZCL0|Q3ZCL0_BOVIN"	LRRGVSPPPSNML	480.5978+++	3	480.598	LRRGVSPPPSNM[+16]L	429876768
tr|Q3ZCL0|Q3ZCL0_BOVIN"	LRRGVSPPPSNM	442.9031+++	3	442.903	LRRGVSPPPSNM[+16]	178061568
tr|Q3ZCL0|Q3ZCL0_BOVIN"	NVQTEIVNKHND	470.9039+++	3	470.904	NVQTEIVNKHND	51480496
tr|Q3ZCL0|Q3ZCL0_BOVIN"	TEIVNKHNDLR	446.9090+++	3	446.909	TEIVNKHNDLR	33019728
tr|Q3ZCL0|Q3ZCL0_BOVIN"	FADLSNTLKNVQTEIVNKHNDL	629.0803++++	4	629.08	FADLSNTLKNVQTEIVNKHNDL	17162226
tr|Q3ZCL0|Q3ZCL0_BOVIN"	FADLSNTLKNVQTEIVNK	678.7004+++	3	678.7	FADLSNTLKNVQTEIVNK	20768308
tr|Q56J78|Q56J78_BOVIN"	GMTRDQVREDSKADQAANEWGRSGKD	727.5904++++	4	727.59	GMTRDQVREDSKADQAANEWGRSGKD	2078615552
tr|Q56J78|Q56J78_BOVIN"	GMTRDQVREDSKADQAANEWGRSGKDPN	784.3631++++	4	784.363	GM[+16]TRDQVREDSKADQAANEWGRSGKDPN	222308032
tr|Q56J78|Q56J78_BOVIN"	PNHFRPAGLPNKY	755.8993++ 504.2686+++ 378.4533++++	2 3 4	755.899317 504.268636 378.453296	PNHFRPAGLPNKY	36536147456
tr|Q56J78|Q56J78_BOVIN"	SKADQAANEWGRSGKD	573.9397+++	3	573.94	SKADQAANEWGRSGKD	1313149696
tr|Q56J78|Q56J78_BOVIN"	GMTRDQVREDSKADQAANEWGRSGKD	731.5891++++	4	731.589	GM[+16]TRDQVREDSKADQAANEWGRSGKD	1598759552
tr|Q56J78|Q56J78_BOVIN"	SKADQAANEWGRSGKDPNH	689.9912+++ 517.7452++++	3 4	689.991219 517.745233	SKADQAANEWGRSGKDPNH	60680348
tr|Q56J78|Q56J78_BOVIN"	GMTRDQVREDSKADQAANEWGR	846.0580+++ 634.7953++++	3 4	846.057963 634.795291	GM[+16]TRDQVREDSKADQAANEWGR	474754272
tr|Q56J78|Q56J78_BOVIN"	QVREDSKADQAANEWGRSGKD	783.0389+++ 587.5310++++	3 4	783.038897 587.530992	QVREDSKADQAANEWGRSGKD	308353824
tr|Q56J78|Q56J78_BOVIN"	GMTRDQVREDSKADQAANEWGR	630.7966++++	4	630.797	GMTRDQVREDSKADQAANEWGR	333973248
tr|Q56J78|Q56J78_BOVIN"	DQVREDSKADQAANEWGRSGKD	821.3812+++	3	821.381	DQVREDSKADQAANEWGRSGKD	107460984
tr|Q56J78|Q56J78_BOVIN"	HFRPAGLPNKY	433.9034+++	3	433.903	HFRPAGLPNKY	327881728
tr|Q56J78|Q56J78_BOVIN"	SGKDPNHFRPAGLPNKY	633.3271+++ 475.2471++++	3 4	633.327103 475.247146	SGKDPNHFRPAGLPNKY	336952544
tr|Q56J78|Q56J78_BOVIN"	AAQRGPGGAWAAKVISN	551.9655+++	3	551.966	AAQRGPGGAWAAKVISN	173159264
tr|Q56J78|Q56J78_BOVIN"	QAANEWGRSGKD	659.8104++ 440.2093+++	2 3	659.810364 440.209335	QAANEWGRSGKD	106741210
tr|Q56J78|Q56J78_BOVIN" tr|Q8SQ28|Q8SQ28_BOVIN" tr|Q9MZT5|Q9MZT5_BOVIN" tr|B8Y7I4|B8Y7I4_BOVIN"	GMTRDQVRED	603.7802++	2	603.78	GMTRDQVRED	530398464
tr|Q56J78|Q56J78_BOVIN" tr|Q8SQ28|Q8SQ28_BOVIN" tr|Q9MZT5|Q9MZT5_BOVIN" tr|B8Y7I4|B8Y7I4_BOVIN"	VISNARETIQGITD	758.9019++	2	758.902	VISNARETIQGITD	2606712064
tr|Q56J78|Q56J78_BOVIN" tr|Q8SQ28|Q8SQ28_BOVIN" tr|Q9MZT5|Q9MZT5_BOVIN" tr|B8Y7I4|B8Y7I4_BOVIN"	PLFKGMTRDQVRED	423.7188++++	4	423.719	PLFKGMTRDQVRED	663997440
tr|Q56J78|Q56J78_BOVIN" tr|Q8SQ28|Q8SQ28_BOVIN" tr|Q9MZT5|Q9MZT5_BOVIN" tr|B8Y7I4|B8Y7I4_BOVIN"	ARETIQGITDPLFKGMTRDQVRED	694.8566++++	4	694.857	ARETIQGITDPLFKGMTRDQVRED	632799232
tr|Q56J78|Q56J78_BOVIN" tr|Q8SQ28|Q8SQ28_BOVIN" tr|Q9MZT5|Q9MZT5_BOVIN" tr|B8Y7I4|B8Y7I4_BOVIN"	PLFKGMTRDQVRED	427.7175++++	4	427.718	PLFKGM[+16]TRDQVRED	282298112
tr|Q56J78|Q56J78_BOVIN" tr|Q8SQ28|Q8SQ28_BOVIN" tr|Q9MZT5|Q9MZT5_BOVIN" tr|B8Y7I4|B8Y7I4_BOVIN"	PNHFRPA	419.7196++	2	419.72	PNHFRPA	157778400
tr|Q56J78|Q56J78_BOVIN" tr|Q8SQ28|Q8SQ28_BOVIN" tr|Q9MZT5|Q9MZT5_BOVIN" tr|B8Y7I4|B8Y7I4_BOVIN"	KVISNARETIQGITD	822.9494++ 548.9687+++	2 3	822.9494 548.968692	KVISNARETIQGITD	1292318656
tr|Q56J78|Q56J78_BOVIN" tr|Q8SQ28|Q8SQ28_BOVIN" tr|Q9MZT5|Q9MZT5_BOVIN" tr|B8Y7I4|B8Y7I4_BOVIN"	ARETIQGITDPLFKGMTRD	717.0405+++ 538.0322++++	3 4	717.040522 538.03221	ARETIQGITDPLFKGMTRD	750770784
tr|Q56J78|Q56J78_BOVIN" tr|Q8SQ28|Q8SQ28_BOVIN" tr|Q9MZT5|Q9MZT5_BOVIN" tr|B8Y7I4|B8Y7I4_BOVIN"	GADKYFHARGNYD	505.2321+++	3	505.232	GADKYFHARGNYD	166174912
tr|Q56J78|Q56J78_BOVIN" tr|Q8SQ28|Q8SQ28_BOVIN" tr|Q9MZT5|Q9MZT5_BOVIN" tr|B8Y7I4|B8Y7I4_BOVIN"	PLFKGMTRDQVREDSKAD	698.3530+++	3	698.353	PLFKGMTRDQVREDSKAD	275230752
tr|Q56J78|Q56J78_BOVIN" tr|Q8SQ28|Q8SQ28_BOVIN" tr|Q9MZT5|Q9MZT5_BOVIN" tr|B8Y7I4|B8Y7I4_BOVIN"	ARETIQGITDPLFK	794.9383++ 530.2946+++	2 3	794.938304 530.294628	ARETIQGITDPLFK	439123168
tr|Q56J78|Q56J78_BOVIN" tr|Q8SQ28|Q8SQ28_BOVIN" tr|Q9MZT5|Q9MZT5_BOVIN" tr|B8Y7I4|B8Y7I4_BOVIN"	GMTRDQVREDSKADQ	584.6041+++	3	584.604	GM[+16]TRDQVREDSKADQ	26619736
tr|Q56J78|Q56J78_BOVIN" tr|Q8SQ28|Q8SQ28_BOVIN" tr|Q9MZT5|Q9MZT5_BOVIN" tr|B8Y7I4|B8Y7I4_BOVIN"	ARETIQGITDPLFKGMTRD	722.3722+++	3	722.372	ARETIQGITDPLFKGM[+16]TRD	247056560
tr|Q56J78|Q56J78_BOVIN" tr|Q8SQ28|Q8SQ28_BOVIN" tr|Q9MZT5|Q9MZT5_BOVIN" tr|B8Y7I4|B8Y7I4_BOVIN"	PLFKGMTRD	532.7815++ 355.5234+++	2 3	532.781501 355.523426	PLFKGMTRD	889834592
tr|Q56J78|Q56J78_BOVIN" tr|Q8SQ28|Q8SQ28_BOVIN" tr|Q9MZT5|Q9MZT5_BOVIN" tr|B8Y7I4|B8Y7I4_BOVIN"	PLFKGMTRD	540.7790++ 360.8551+++	2 3	540.778959 360.855065	PLFKGM[+16]TRD	706067664
tr|Q56J78|Q56J78_BOVIN" tr|Q8SQ28|Q8SQ28_BOVIN" tr|Q9MZT5|Q9MZT5_BOVIN" tr|B8Y7I4|B8Y7I4_BOVIN"	GADKYFHARGNY	466.8898+++	3	466.89	GADKYFHARGNY	47026084
tr|Q56J78|Q56J78_BOVIN" tr|Q8SQ28|Q8SQ28_BOVIN" tr|Q9MZT5|Q9MZT5_BOVIN" tr|B8Y7I4|B8Y7I4_BOVIN"	ARETIQGITDPLFKGMTRDQVREDSKAD	799.1531++++	4	799.153	ARETIQGITDPLFKGM[+16]TRDQVREDSKAD	74075656
tr|Q56J78|Q56J78_BOVIN" tr|Q8SQ28|Q8SQ28_BOVIN" tr|Q9MZT5|Q9MZT5_BOVIN" tr|B8Y7I4|B8Y7I4_BOVIN"	FHARGNYDAA	561.2598++	2	561.26	FHARGNYDAA	48962180
tr|Q56J78|Q56J78_BOVIN" tr|Q8SQ28|Q8SQ28_BOVIN" tr|Q9MZT5|Q9MZT5_BOVIN" tr|B8Y7I4|B8Y7I4_BOVIN"	GADKYFH	419.1981++	2	419.198	GADKYFH	69924624
tr|Q56J78|Q56J78_BOVIN" tr|Q8SQ28|Q8SQ28_BOVIN" tr|Q9MZT5|Q9MZT5_BOVIN" tr|B8Y7I4|B8Y7I4_BOVIN"	SNARETIQGITD	652.8257++	2	652.826	SNARETIQGITD	160786400
tr|Q56J78|Q56J78_BOVIN" tr|Q8SQ28|Q8SQ28_BOVIN" tr|Q9MZT5|Q9MZT5_BOVIN" tr|B8Y7I4|B8Y7I4_BOVIN"	ARETIQGITDPLF	730.8908++	2	730.891	ARETIQGITDPLF	1129101696
tr|Q56J78|Q56J78_BOVIN" tr|Q8SQ28|Q8SQ28_BOVIN" tr|Q9MZT5|Q9MZT5_BOVIN" tr|B8Y7I4|B8Y7I4_BOVIN"	FLKEAGQGAKD	388.5400+++	3	388.54	FLKEAGQGAKD	43177752
tr|Q8MK56|Q8MK56_BOVIN"	ILVATLVMP	486.7935++	2	486.794	ILVATLVM[+16]P	30525026
tr|Q8SQ28|Q8SQ28_BOVIN"	PNHFRPAGLPDKY	756.3913++ 504.5966+++ 378.6993++++	2 3 4	756.391324 504.596642 378.6993	PNHFRPAGLPDKY	28276682496
tr|Q8SQ28|Q8SQ28_BOVIN"	SGKDPNHFRPAGLPDKY	475.4931++++	4	475.493	SGKDPNHFRPAGLPDKY	46354056
tr|Q8SQ28|Q8SQ28_BOVIN" tr|Q9MZT5|Q9MZT5_BOVIN" tr|B8Y7I4|B8Y7I4_BOVIN"	GMTRDQVREDSKADQFANEWGRSGKD	750.5970++++	4	750.597	GM[+16]TRDQVREDSKADQFANEWGRSGKD	538406528
tr|Q8SQ28|Q8SQ28_BOVIN" tr|Q9MZT5|Q9MZT5_BOVIN" tr|B8Y7I4|B8Y7I4_BOVIN"	PNHFRPAGLPDK	450.2422+++	3	450.242	PNHFRPAGLPDK	147139360
tr|Q8SQ28|Q8SQ28_BOVIN" tr|Q9MZT5|Q9MZT5_BOVIN" tr|B8Y7I4|B8Y7I4_BOVIN"	DQVREDSKADQFANEWGRSGKD	635.2956++++	4	635.296	DQVREDSKADQFANEWGRSGKD	91974880
tr|Q8SQ28|Q8SQ28_BOVIN" tr|Q9MZT5|Q9MZT5_BOVIN" tr|B8Y7I4|B8Y7I4_BOVIN"	GMTRDQVREDSKADQFANEWGR	653.8031++++	4	653.803	GM[+16]TRDQVREDSKADQFANEWGR	109363592
tr|Q8SQ28|Q8SQ28_BOVIN" tr|Q9MZT5|Q9MZT5_BOVIN" tr|B8Y7I4|B8Y7I4_BOVIN"	SKADQFANEWGRSGKD	898.4215++ 599.2835+++	2 3	898.421538 599.283451	SKADQFANEWGRSGKD	989271240
tr|Q8SQ28|Q8SQ28_BOVIN" tr|Q9MZT5|Q9MZT5_BOVIN" tr|B8Y7I4|B8Y7I4_BOVIN"	GMTRDQVREDSKADQFANEWGR	649.8044++++	4	649.804	GMTRDQVREDSKADQFANEWGR	160810336
tr|Q95394|Q95394_BOVIN"	PPKAHVTHHPISE	483.9248+++	3	483.925	PPKAHVTHHPISE	121059232
tr|Q95394|Q95394_BOVIN"	PPKAHVTHHPISER	402.2207++++	4	402.221	PPKAHVTHHPISER	32982332
tr|Q9TS74|Q9TS74_BOVIN"	LPENVTPEEQHKGTSVD	940.4552++ 627.3059+++	2 3	940.455244 627.305921	LPENVTPEEQHKGTSVD	474312360
tr|Q9TS74|Q9TS74_BOVIN"	ENVTPEEQHKGTSVD	557.2603+++	3	557.26	ENVTPEEQHKGTSVD	27084090
					Total Area

## Sheet: J LT ND
Protein	Peptide	Precursor	Precursor Charge	Precursor Mz	Peptide Modified Sequence	B2_2 Total Area
sp|A0JNP2|SG1D_BOVIN"	VKAVLNPSSA	493.2875++	2	493.287	VKAVLNPSSA	347400544
sp|P00711|LALBA_BOVIN" tr|G9G9X6|G9G9X6_BOVIN"	HTSGYDTQAIVQNND	831.8713++	2	831.871	HTSGYDTQAIVQNND	466704960
sp|P00711|LALBA_BOVIN" tr|G9G9X6|G9G9X6_BOVIN"	TTFHTSGYDTQAIVQNND	1006.4532++	2	1006.45	TTFHTSGYDTQAIVQNND	645911360
sp|P00711|LALBA_BOVIN" tr|G9G9X6|G9G9X6_BOVIN"	KFLDDDLTD	541.2560++	2	541.256	KFLDDDLTD	19580891136
sp|P00711|LALBA_BOVIN" tr|G9G9X6|G9G9X6_BOVIN"	KVGINYWLAHK	443.5873+++	3	443.587	KVGINYWLAHK	240371808
sp|P00711|LALBA_BOVIN" tr|G9G9X6|G9G9X6_BOVIN"	KFLDDDLT	483.7426++	2	483.743	KFLDDDLT	784092544
sp|P00711|LALBA_BOVIN" tr|G9G9X6|G9G9X6_BOVIN"	TSGYDTQAIVQNND	763.3419++	2	763.342	TSGYDTQAIVQNND	853137984
sp|P00711|LALBA_BOVIN" tr|G9G9X6|G9G9X6_BOVIN"	TQAIVQNND	501.7462++	2	501.746	TQAIVQNND	197956736
sp|P00711|LALBA_BOVIN" tr|G9G9X6|G9G9X6_BOVIN"	KFLDDDLTDD	598.7695++	2	598.77	KFLDDDLTDD	9871534080
sp|P00711|LALBA_BOVIN" tr|G9G9X6|G9G9X6_BOVIN"	TFHTSGYDTQAIVQNND	955.9294++	2	955.929	TFHTSGYDTQAIVQNND	175930512
sp|P00711|LALBA_BOVIN" tr|G9G9X6|G9G9X6_BOVIN"	KVGINYWLAHKA	467.2663+++	3	467.266	KVGINYWLAHKA	145003136
sp|P00711|LALBA_BOVIN" tr|G9G9X6|G9G9X6_BOVIN"	EQLTKCEVFRELK	541.6239+++	3	541.624	EQLTKCEVFRELK	326223680
sp|P00711|LALBA_BOVIN" tr|G9G9X6|G9G9X6_BOVIN"	TQAIVQNNDSTEYG	770.3497++	2	770.35	TQAIVQNNDSTEYG	118462808
sp|P00711|LALBA_BOVIN" tr|G9G9X6|G9G9X6_BOVIN"	FHTSGYDTQAIVQNND	905.4056++	2	905.406	FHTSGYDTQAIVQNND	143691072
sp|P00711|LALBA_BOVIN" tr|G9G9X6|G9G9X6_BOVIN"	LTDDIMCVKKILD	502.9351+++	3	502.935	LTDDIMCVKKILD	61289672
sp|P00711|LALBA_BOVIN" tr|G9G9X6|G9G9X6_BOVIN"	GYDTQAIVQNND	669.3020++	2	669.302	GYDTQAIVQNND	154157440
sp|P00711|LALBA_BOVIN" tr|G9G9X6|G9G9X6_BOVIN"	TQAIVQNNDSTEY	741.8390++	2	741.839	TQAIVQNNDSTEY	114971160
sp|P00711|LALBA_BOVIN" tr|G9G9X6|G9G9X6_BOVIN" tr|Q9TRC0|Q9TRC0_BOVIN"	RELKDLKGY	374.5486+++	3	374.549	RELKDLKGY	1235026688
sp|P00711|LALBA_BOVIN" tr|G9G9X6|G9G9X6_BOVIN" tr|Q9TRC0|Q9TRC0_BOVIN"	RELKDLKGYGG	412.5629+++	3	412.563	RELKDLKGYGG	36483976
sp|P02662|CASA1_BOVIN"	SVEQKHIQKEDVPSE	584.9636+++	3	584.964	SVEQKHIQKEDVPSE	219177408
sp|P02662|CASA1_BOVIN"	HIQKEDVPSERYLGYLEQLL	810.7603+++	3	810.76	HIQKEDVPSERYLGYLEQLL	215738928
sp|P02662|CASA1_BOVIN"	HIQKEDVPSERYLGYLE	692.6847+++	3	692.685	HIQKEDVPSERYLGYLE	639209216
sp|P02662|CASA1_BOVIN"	HIQKEDVPSERY	750.8757++ 500.9196+++	2 3	750.875704 500.919561	HIQKEDVPSERY	2249907528
sp|P02662|CASA1_BOVIN"	APSFSDIPNPIGSENSEKTTMPLW	1309.6258++ 873.4196+++	2 3	1309.625786 873.419616	APSFSDIPNPIGSENSEKTTMPLW	1659334912
sp|P02662|CASA1_BOVIN"	IPNPIGSENSEKTTMPLW	1007.5011++ 672.0032+++	2 3	1007.50114 672.003185	IPNPIGSENSEKTTMPLW	1311061504
sp|P02662|CASA1_BOVIN"	SVEQKHIQKEDVPSER	994.9755++ 663.6528+++ 497.9914++++	2 3 4	994.975493 663.652754 497.991385	S[+80]VEQKHIQKEDVPSER	4226452112
sp|P02662|CASA1_BOVIN"	SVEQKHIQKEDVPSER	954.9923++ 636.9973+++ 477.9998++++	2 3 4	954.992328 636.997311 477.999802	SVEQKHIQKEDVPSER	2702327292
sp|P02662|CASA1_BOVIN"	HIQKEDVPSER	669.3440++ 446.5651+++	2 3	669.34404 446.565119	HIQKEDVPSER	1185684384
sp|P02662|CASA1_BOVIN"	SVEQKHIQKEDVPSERY	518.7656++++	4	518.766	SVEQKHIQKEDVPSERY	33230662
sp|P02662|CASA1_BOVIN"	SDIPNPIGSENSEKTTMPLW	1108.5306++ 739.3562+++	2 3	1108.530626 739.356176	SDIPNPIGSENSEKTTMPLW	1247860240
sp|P02662|CASA1_BOVIN"	APSFSDIPNPIGSENSEKTTMPLW	878.7513+++	3	878.751	APSFSDIPNPIGSENSEKTTM[+16]PLW	240569312
sp|P02662|CASA1_BOVIN"	APSFSDIPNPIGSENSEKTTMP	1160.0441++	2	1160.04	APSFSDIPNPIGSENSEKTTMP	188243168
sp|P02662|CASA1_BOVIN"	TDAPSFSDIPNPIGSENSEKTTMPLW	945.4445+++	3	945.444	TDAPSFSDIPNPIGSENSEKTTMPLW	137960048
sp|P02662|CASA1_BOVIN"	DIPNPIGSENSEKTTMPLW	1065.0146++	2	1065.01	DIPNPIGSENSEKTTMPLW	175983936
sp|P02662|CASA1_BOVIN"	PIGSENSEKTTMPLW	845.4113++	2	845.411	PIGSENSEKTTMPLW	222369728
sp|P02662|CASA1_BOVIN"	QKHIQKEDVPSER	531.9496+++	3	531.95	QKHIQKEDVPSER	18034680
sp|P02662|CASA1_BOVIN"	KHIQKEDVPSER	489.2634+++ 367.1994++++	3 4	489.26344 367.199399	KHIQKEDVPSER	360119088
sp|P02662|CASA1_BOVIN"	PNSVEQKHIQKEDVPSER	734.0180+++ 550.7653++++	3 4	734.017985 550.765308	PNS[+80]VEQKHIQKEDVPSER	88940926
sp|P02662|CASA1_BOVIN"	HIQKEDVPSERYLG	835.9285++ 557.6214+++	2 3	835.928468 557.621404	HIQKEDVPSERYLG	6517875264
sp|P02662|CASA1_BOVIN"	HIQKEDVPSERYLGYLEQLLRLK	707.6421++++	4	707.642	HIQKEDVPSERYLGYLEQLLRLK	102420832
sp|P02662|CASA1_BOVIN"	HIQKEDVPSERYLGYLEQL	1159.0948++ 773.0656+++ 580.0510++++	2 3 4	1159.094782 773.065613 580.051029	HIQKEDVPSERYLGYLEQL	3141982256
sp|P02662|CASA1_BOVIN"	HIQKEDVPSERYL	807.4177++ 538.6142+++	2 3	807.417736 538.614249	HIQKEDVPSERYL	849140784
sp|P02662|CASA1_BOVIN"	EQKHIQKEDVPSER	574.9638+++	3	574.964	EQKHIQKEDVPSER	15460077
sp|P02662|CASA1_BOVIN"	NSVEQKHIQKEDVPSER	701.6671+++ 526.5021++++	3 4	701.667063 526.502117	NS[+80]VEQKHIQKEDVPSER	135450524
sp|P02662|CASA1_BOVIN"	VPNSVEQKHIQKEDVPSER	575.5324++++	4	575.532	VPNS[+80]VEQKHIQKEDVPSER	62427636
sp|P02662|CASA1_BOVIN"	SFSDIPNPIGSENSEKTTMPLW	1225.5808++	2	1225.58	SFSDIPNPIGSENSEKTTMPLW	13504847
sp|P02662|CASA1_BOVIN"	HIQKEDVPSERYLGYLEQ	735.3709+++	3	735.371	HIQKEDVPSERYLGYLEQ	35384984
sp|P02662|CASA1_BOVIN"	IPNPIGSENSEKTTMPLW	1015.4986++ 677.3348+++	2 3	1015.498597 677.334824	IPNPIGSENSEKTTM[+16]PLW	301661784
sp|P02662|CASA1_BOVIN"	SVEQKHIQKEDVPSERYL	547.0367++++	4	547.037	SVEQKHIQKEDVPSERYL	184199216
sp|P02662|CASA1_BOVIN"	HIQKEDVPSERYLGY	459.2337++++	4	459.234	HIQKEDVPSERYLGY	71716784
sp|P02662|CASA1_BOVIN"	EIVPNSVEQKHIQKEDVPSER	616.0725++++	4	616.072	EIVPNSVEQKHIQKEDVPSER	62747976
sp|P02662|CASA1_BOVIN"	HIQKEDVPSERYLGYLEQLLR	647.3473++++	4	647.347	HIQKEDVPSERYLGYLEQLLR	114023112
sp|P02662|CASA1_BOVIN"	IQKEDVPSERY	682.3462++	2	682.346	IQKEDVPSERY	38339720
sp|P02662|CASA1_BOVIN" tr|B5B3R8|B5B3R8_BOVIN"	EVLNENLLRF	623.8431++	2	623.843	EVLNENLLRF	4932838400
sp|P02662|CASA1_BOVIN" tr|B5B3R8|B5B3R8_BOVIN"	EKVNELSKDIGSESTEDQAMED	818.6990+++	3	818.699	EKVNELSKDIGSESTEDQAMED	3204678656
sp|P02662|CASA1_BOVIN" tr|B5B3R8|B5B3R8_BOVIN"	RPKHPIKHQGLPQEVLN	664.3814+++ 498.5379++++	3 4	664.38143 498.537892	RPKHPIKHQGLPQEVLN	6101881344
sp|P02662|CASA1_BOVIN" tr|B5B3R8|B5B3R8_BOVIN"	RPKHPIKHQGLPQEVL	939.0470++ 626.3671+++ 470.0272++++	2 3 4	939.047044 626.367121 470.02716	RPKHPIKHQGLPQEVL	71701531392
sp|P02662|CASA1_BOVIN" tr|B5B3R8|B5B3R8_BOVIN"	FVAPFPEVFGK	619.3344++	2	619.334	FVAPFPEVFGK	6382524928
sp|P02662|CASA1_BOVIN" tr|B5B3R8|B5B3R8_BOVIN"	VPQLEIVPNSAEERLHSMK	753.0397+++	3	753.04	VPQLEIVPNS[+80]AEERLHSMK	415778656
sp|P02662|CASA1_BOVIN" tr|B5B3R8|B5B3R8_BOVIN"	VAPFPEVFGK	545.8002++	2	545.8	VAPFPEVFGK	3414170880
sp|P02662|CASA1_BOVIN" tr|B5B3R8|B5B3R8_BOVIN"	SMKEGIHAQQKEPM	538.5973+++	3	538.597	SMKEGIHAQQKEPM	44230704
sp|P02662|CASA1_BOVIN" tr|B5B3R8|B5B3R8_BOVIN"	RPKHPIKHQGLP	469.9492+++	3	469.949	RPKHPIKHQGLP	713482048
sp|P02662|CASA1_BOVIN" tr|B5B3R8|B5B3R8_BOVIN"	YKVPQLEIVPNSAEERLHSMK	637.8212++++	4	637.821	YKVPQLEIVPNS[+80]AEERLHSMK	654565376
sp|P02662|CASA1_BOVIN" tr|B5B3R8|B5B3R8_BOVIN"	RPKHPIKHQGLPQEVLNENLLRF	691.6437++++	4	691.644	RPKHPIKHQGLPQEVLNENLLRF	1281893632
sp|P02662|CASA1_BOVIN" tr|B5B3R8|B5B3R8_BOVIN"	VAPFPEVFGKEKVNELSK	673.3701+++ 505.2794++++	3 4	673.370085 505.279383	VAPFPEVFGKEKVNELSK	2849632000
sp|P02662|CASA1_BOVIN" tr|B5B3R8|B5B3R8_BOVIN"	RPKHPIKHQGLPQEVLNE	707.3956+++ 530.7985++++	3 4	707.395628 530.79854	RPKHPIKHQGLPQEVLNE	9793879808
sp|P02662|CASA1_BOVIN" tr|B5B3R8|B5B3R8_BOVIN"	EKVNELSKDIGSESTED	940.4420++ 627.2971+++	2 3	940.441999 627.297091	EKVNELSKDIGSESTED	7436842752
sp|P02662|CASA1_BOVIN" tr|B5B3R8|B5B3R8_BOVIN"	IGSESTEDQAMEDIK	826.8696++	2	826.87	IGSESTEDQAMEDIK	820221312
sp|P02662|CASA1_BOVIN" tr|B5B3R8|B5B3R8_BOVIN"	VAPFPEVFGKEKV	723.9032++ 482.9379+++	2 3	723.903202 482.937893	VAPFPEVFGKEKV	6009871360
sp|P02662|CASA1_BOVIN" tr|B5B3R8|B5B3R8_BOVIN"	FVAPFPEVFGKEKVNELSK	722.3929+++ 542.0465++++	3 4	722.39289 542.046487	FVAPFPEVFGKEKVNELSK	2146132224
sp|P02662|CASA1_BOVIN" tr|B5B3R8|B5B3R8_BOVIN"	FVAPFPEVFGKEKV	797.4374++ 531.9607+++	2 3	797.437409 531.960698	FVAPFPEVFGKEKV	4826356608
sp|P02662|CASA1_BOVIN" tr|B5B3R8|B5B3R8_BOVIN"	RPKHPIKHQGLPQEVLNENLLR	872.8330+++ 654.8766++++	3 4	872.833017 654.876582	RPKHPIKHQGLPQEVLNENLLR	8330057472
sp|P02662|CASA1_BOVIN" tr|B5B3R8|B5B3R8_BOVIN"	KEGIHAQQKEPMIGVNQEL	717.0405+++ 538.0322++++	3 4	717.040522 538.03221	KEGIHAQQKEPMIGVNQEL	1168238048
sp|P02662|CASA1_BOVIN" tr|B5B3R8|B5B3R8_BOVIN"	NELSKDIGSESTEDQAMED	1049.4419++	2	1049.44	NELSKDIGSESTEDQAMED	406157568
sp|P02662|CASA1_BOVIN" tr|B5B3R8|B5B3R8_BOVIN"	FVAPFPEVFGKEK	747.9032++ 498.9379+++	2 3	747.903202 498.937893	FVAPFPEVFGKEK	9564625920
sp|P02662|CASA1_BOVIN" tr|B5B3R8|B5B3R8_BOVIN"	RPKHPIKHQGLPQE	832.9708++ 555.6496+++ 416.9890++++	2 3 4	832.970805 555.649628 416.98904	RPKHPIKHQGLPQE	14100729192
sp|P02662|CASA1_BOVIN" tr|B5B3R8|B5B3R8_BOVIN"	RPKHPIKHQGLPQEVLNEN	745.4099+++ 559.3093++++	3 4	745.409937 559.309272	RPKHPIKHQGLPQEVLNEN	16933964288
sp|P02662|CASA1_BOVIN" tr|B5B3R8|B5B3R8_BOVIN"	RPKHPIKHQGLPQEVLNENL	1174.1533++ 783.1046+++ 587.5803++++	2 3 4	1174.1533 783.104625 587.580288	RPKHPIKHQGLPQEVLNENL	59402151104
sp|P02662|CASA1_BOVIN" tr|B5B3R8|B5B3R8_BOVIN"	VPQLEIVPNSAEERLHSM	1025.0253++ 683.6860+++	2 3	1025.025314 683.685968	VPQLEIVPNSAEERLHSM	1010565232
sp|P02662|CASA1_BOVIN" tr|B5B3R8|B5B3R8_BOVIN"	VPSERYLGYLEQL	783.9118++	2	783.912	VPSERYLGYLEQL	1161334016
sp|P02662|CASA1_BOVIN" tr|B5B3R8|B5B3R8_BOVIN"	EKVNELSKDIGSESTED	980.4252++ 653.9525+++ 980.4252++	2 3 2	980.425165 653.952535 980.425165	EKVNELSKDIGSES[+80]TED EKVNELSKDIGS[+80]ESTED	5775727488
sp|P02662|CASA1_BOVIN" tr|B5B3R8|B5B3R8_BOVIN"	RPKHPIKHQGL	437.5983+++	3	437.598	RPKHPIKHQGL	157253168
sp|P02662|CASA1_BOVIN" tr|B5B3R8|B5B3R8_BOVIN"	VPQLEIVPNSAEERLHSM	1065.0085++ 710.3414+++ 710.3414+++	2 3 3	1065.008479 710.341411 710.341411	VPQLEIVPNS[+80]AEERLHSM VPQLEIVPNSAEERLHS[+80]M	2013076528
sp|P02662|CASA1_BOVIN" tr|B5B3R8|B5B3R8_BOVIN"	RPKHPIKHQGLPQ	768.4495++ 512.6354+++ 384.7284++++	2 3 4	768.449508 512.635431 384.728392	RPKHPIKHQGLPQ	38602180608
sp|P02662|CASA1_BOVIN" tr|B5B3R8|B5B3R8_BOVIN"	SKDIGSESTEDQAMED	871.3571++	2	871.357	SKDIGSESTEDQAMED	350082560
sp|P02662|CASA1_BOVIN" tr|B5B3R8|B5B3R8_BOVIN"	RPKHPIKHQGLPQEVLNENLL	820.7993+++ 615.8513++++	3 4	820.799313 615.851304	RPKHPIKHQGLPQEVLNENLL	24329440768
sp|P02662|CASA1_BOVIN" tr|B5B3R8|B5B3R8_BOVIN"	EKVNELSKDIGSESTED	1020.4083++	2	1020.41	EKVNELSKDIGS[+80]ES[+80]TED	2536094464
sp|P02662|CASA1_BOVIN" tr|B5B3R8|B5B3R8_BOVIN"	GLPQEVLNENLLRF	821.4516++ 547.9701+++	2 3	821.451579 547.970145	GLPQEVLNENLLRF	1411914336
sp|P02662|CASA1_BOVIN" tr|B5B3R8|B5B3R8_BOVIN"	YKVPQLEIVPNSAEERLHSM	807.3942+++ 605.7975++++	3 4	807.394175 605.79745	YKVPQLEIVPNS[+80]AEERLHSM	1039942464
sp|P02662|CASA1_BOVIN" tr|B5B3R8|B5B3R8_BOVIN"	APFPEVFGKEKVNELS	597.6490+++	3	597.649	APFPEVFGKEKVNELS	286217536
sp|P02662|CASA1_BOVIN" tr|B5B3R8|B5B3R8_BOVIN"	VPSERYL	432.2347++	2	432.235	VPSERYL	3661162496
sp|P02662|CASA1_BOVIN" tr|B5B3R8|B5B3R8_BOVIN"	FVAPFPEVFGKEKVNELSKDIG	817.4370+++ 613.3296++++	3 4	817.437047 613.329604	FVAPFPEVFGKEKVNELSKDIG	276314384
sp|P02662|CASA1_BOVIN" tr|B5B3R8|B5B3R8_BOVIN"	VNELSKDIGSESTED	811.8732++	2	811.873	VNELSKDIGSESTED	1813898112
sp|P02662|CASA1_BOVIN" tr|B5B3R8|B5B3R8_BOVIN"	VAPFPEVFGKEKVNELSKDIG	576.5625++++	4	576.563	VAPFPEVFGKEKVNELSKDIG	608903296
sp|P02662|CASA1_BOVIN" tr|B5B3R8|B5B3R8_BOVIN"	VAPFPEVFGKEKVNE	563.9664+++	3	563.966	VAPFPEVFGKEKVNE	617694784
sp|P02662|CASA1_BOVIN" tr|B5B3R8|B5B3R8_BOVIN"	EKVNELSKDIGSESTEDQAMEDIK	899.0920+++	3	899.092	EKVNELSKDIGSESTEDQAMEDIK	403812992
sp|P02662|CASA1_BOVIN" tr|B5B3R8|B5B3R8_BOVIN"	FVAPFPEVFGKE	683.8557++	2	683.856	FVAPFPEVFGKE	464112352
sp|P02662|CASA1_BOVIN" tr|B5B3R8|B5B3R8_BOVIN"	VAPFPEVFGKEKVNELS	945.5040++ 630.6718+++	2 3	945.504009 630.671764	VAPFPEVFGKEKVNELS	210711696
sp|P02662|CASA1_BOVIN" tr|B5B3R8|B5B3R8_BOVIN"	SAEERLHSM	530.2480++	2	530.248	SAEERLHSM	120701424
sp|P02662|CASA1_BOVIN" tr|B5B3R8|B5B3R8_BOVIN"	VPSERYLGYLE	663.3404++	2	663.34	VPSERYLGYLE	1178240384
sp|P02662|CASA1_BOVIN" tr|B5B3R8|B5B3R8_BOVIN"	YKVPQLEIVPNSAEERLHSM	780.7387+++ 585.8059++++	3 4	780.738732 585.805868	YKVPQLEIVPNSAEERLHSM	656095200
sp|P02662|CASA1_BOVIN" tr|B5B3R8|B5B3R8_BOVIN"	KHPIKHQGLPQEVLNENL	698.7200+++ 524.2918++++	3 4	698.72 524.291819	KHPIKHQGLPQEVLNENL	509976928
sp|P02662|CASA1_BOVIN" tr|B5B3R8|B5B3R8_BOVIN"	KYKVPQLEIVPNSAEERLHSM	850.0925+++ 637.8212++++	3 4	850.092496 637.821191	KYKVPQLEIVPNS[+80]AEERLHSM	874103328
sp|P02662|CASA1_BOVIN" tr|B5B3R8|B5B3R8_BOVIN"	GLPQEVLNENLLR	747.9174++	2	747.917	GLPQEVLNENLLR	422721632
sp|P02662|CASA1_BOVIN" tr|B5B3R8|B5B3R8_BOVIN"	LHSMKEGIHAQQKE	545.9472+++ 409.7122++++	3 4	545.947234 409.712245	LHSMKEGIHAQQKE	139824780
sp|P02662|CASA1_BOVIN" tr|B5B3R8|B5B3R8_BOVIN"	VAPFPEVFGKEKVNEL	901.9880++ 601.6611+++	2 3	901.987994 601.661088	VAPFPEVFGKEKVNEL	1520270592
sp|P02662|CASA1_BOVIN" tr|B5B3R8|B5B3R8_BOVIN"	VPSERYLGYLEQ	727.3697++	2	727.37	VPSERYLGYLEQ	655005120
sp|P02662|CASA1_BOVIN" tr|B5B3R8|B5B3R8_BOVIN"	LPQEVLNENLL	641.3561++	2	641.356	LPQEVLNENLL	139469872
sp|P02662|CASA1_BOVIN" tr|B5B3R8|B5B3R8_BOVIN"	KVNELSKDIGSESTEDQAMEDIK	642.3102++++	4	642.31	KVNELSKDIGSESTEDQAMEDIK	90184296
sp|P02662|CASA1_BOVIN" tr|B5B3R8|B5B3R8_BOVIN"	NENLLRFF	526.7798++	2	526.78	NENLLRFF	832507328
sp|P02662|CASA1_BOVIN" tr|B5B3R8|B5B3R8_BOVIN"	FFVAPFPEVFGKEKVNELSKD	809.7580+++ 607.5703++++	3 4	809.758009 607.570326	FFVAPFPEVFGKEKVNELSKD	147374722
sp|P02662|CASA1_BOVIN" tr|B5B3R8|B5B3R8_BOVIN"	KYKVPQLEIVPNSAEER	667.3652+++	3	667.365	KYKVPQLEIVPNSAEER	489073600
sp|P02662|CASA1_BOVIN" tr|B5B3R8|B5B3R8_BOVIN"	FVAPFPEVFGKEKVNELSKD	1140.5992++ 760.7352+++ 570.8032++++	2 3 4	1140.599169 760.735204 570.803222	FVAPFPEVFGKEKVNELSKD	8068851060
sp|P02662|CASA1_BOVIN" tr|B5B3R8|B5B3R8_BOVIN"	EVLNENLLR	550.3089++	2	550.309	EVLNENLLR	1121438080
sp|P02662|CASA1_BOVIN" tr|B5B3R8|B5B3R8_BOVIN"	EKVNELSKDIGSESTEDQAMEDIK	904.4236+++	3	904.424	EKVNELSKDIGSESTEDQAM[+16]EDIK	194901440
sp|P02662|CASA1_BOVIN" tr|B5B3R8|B5B3R8_BOVIN"	FVAPFPEVFGKEKVN	569.9750+++	3	569.975	FVAPFPEVFGKEKVN	61044504
sp|P02662|CASA1_BOVIN" tr|B5B3R8|B5B3R8_BOVIN"	EKVNELSKDIGSESTEDQAME	780.3567+++	3	780.357	EKVNELSKDIGSESTEDQAME	251598448
sp|P02662|CASA1_BOVIN" tr|B5B3R8|B5B3R8_BOVIN"	VPSERYLGY	542.2771++	2	542.277	VPSERYLGY	1355888768
sp|P02662|CASA1_BOVIN" tr|B5B3R8|B5B3R8_BOVIN"	VAPFPEVFG	481.7527++	2	481.753	VAPFPEVFG	283550208
sp|P02662|CASA1_BOVIN" tr|B5B3R8|B5B3R8_BOVIN"	EKVNELSKDIGSESTEDQAMED	1267.5280++	2	1267.53	EKVNELSKDIGSES[+80]TEDQAMED	380577696
sp|P02662|CASA1_BOVIN" tr|B5B3R8|B5B3R8_BOVIN"	KHPIKHQGLPQEVL	541.9825+++ 406.7387++++	3 4	541.982496 406.738691	KHPIKHQGLPQEVL	971988864
sp|P02662|CASA1_BOVIN" tr|B5B3R8|B5B3R8_BOVIN"	NELSKDIGSESTED	762.3390++	2	762.339	NELSKDIGSESTED	1265207680
sp|P02662|CASA1_BOVIN" tr|B5B3R8|B5B3R8_BOVIN"	EIVPNSVEQK	611.7894++	2	611.789	EIVPNS[+80]VEQK	568085632
sp|P02662|CASA1_BOVIN" tr|B5B3R8|B5B3R8_BOVIN"	VPSERYLGYL	598.8191++	2	598.819	VPSERYLGYL	628020864
sp|P02662|CASA1_BOVIN" tr|B5B3R8|B5B3R8_BOVIN"	LKKYKVPQLEIVPNSAEERLHSM	698.1159++++	4	698.116	LKKYKVPQLEIVPNS[+80]AEERLHSM	516679232
sp|P02662|CASA1_BOVIN" tr|B5B3R8|B5B3R8_BOVIN"	KYKVPQLEIVPNSAEERLHSM	617.8296++++	4	617.83	KYKVPQLEIVPNSAEERLHSM	219578400
sp|P02662|CASA1_BOVIN" tr|B5B3R8|B5B3R8_BOVIN"	NENLLRF	453.2456++	2	453.246	NENLLRF	1102752128
sp|P02662|CASA1_BOVIN" tr|B5B3R8|B5B3R8_BOVIN"	LKKYKVPQLEIVPNSAEER	747.7582+++ 561.0705++++	3 4	747.758232 561.070493	LKKYKVPQLEIVPNSAEER	688745856
sp|P02662|CASA1_BOVIN" tr|B5B3R8|B5B3R8_BOVIN"	KEGIHAQQKEPMIGVNQ	636.3316+++	3	636.332	KEGIHAQQKEPMIGVNQ	226149632
sp|P02662|CASA1_BOVIN" tr|B5B3R8|B5B3R8_BOVIN"	FVAPFPEVFGKEKVNEL	975.5222++ 650.6839+++	2 3	975.522201 650.683893	FVAPFPEVFGKEKVNEL	877735904
sp|P02662|CASA1_BOVIN" tr|B5B3R8|B5B3R8_BOVIN"	IGSESTEDQAMED	706.2801++	2	706.28	IGSESTEDQAMED	305933376
sp|P02662|CASA1_BOVIN" tr|B5B3R8|B5B3R8_BOVIN"	RPKHPIKHQGLPQEV	882.5050++ 588.6724+++ 441.7561++++	2 3 4	882.505012 588.672433 441.756144	RPKHPIKHQGLPQEV	3748046920
sp|P02662|CASA1_BOVIN" tr|B5B3R8|B5B3R8_BOVIN"	VNELSKDIGSESTEDQAMED	1098.9761++ 732.9865+++	2 3	1098.976077 732.986477	VNELSKDIGSESTEDQAMED	864648176
sp|P02662|CASA1_BOVIN" tr|B5B3R8|B5B3R8_BOVIN"	FVAPFPEVFGKEKVNE	918.9802++ 612.9892+++	2 3	918.980169 612.989205	FVAPFPEVFGKEKVNE	560265200
sp|P02662|CASA1_BOVIN" tr|B5B3R8|B5B3R8_BOVIN"	APFPEVFGKEKV	449.9151+++	3	449.915	APFPEVFGKEKV	46413680
sp|P02662|CASA1_BOVIN" tr|B5B3R8|B5B3R8_BOVIN"	HPIKHQGLPQEVLNENLL	1040.0709++	2	1040.07	HPIKHQGLPQEVLNENLL	90616872
sp|P02662|CASA1_BOVIN" tr|B5B3R8|B5B3R8_BOVIN"	VNELSKDIGSESTED	851.8564++	2	851.856	VNELSKDIGSES[+80]TED	689800128
sp|P02662|CASA1_BOVIN" tr|B5B3R8|B5B3R8_BOVIN"	GLPQEVLNENLL	669.8668++	2	669.867	GLPQEVLNENLL	267469664
sp|P02662|CASA1_BOVIN" tr|B5B3R8|B5B3R8_BOVIN"	KHPIKHQGLPQEVLNENLL	736.4147+++	3	736.415	KHPIKHQGLPQEVLNENLL	228881392
sp|P02662|CASA1_BOVIN" tr|B5B3R8|B5B3R8_BOVIN"	IKHQGLPQEVLNENLL	615.6791+++	3	615.679	IKHQGLPQEVLNENLL	106731616
sp|P02662|CASA1_BOVIN" tr|B5B3R8|B5B3R8_BOVIN"	VPSERYLGYLEQLLR	612.6720+++	3	612.672	VPSERYLGYLEQLLR	44279692
sp|P02662|CASA1_BOVIN" tr|B5B3R8|B5B3R8_BOVIN"	APFPEVFGKEKVNELSKD	678.6896+++ 509.2690++++	3 4	678.689595 509.269015	APFPEVFGKEKVNELSKD	98297920
sp|P02662|CASA1_BOVIN" tr|B5B3R8|B5B3R8_BOVIN"	SKDIGSESTEDQAMEDIK	661.6335+++	3	661.633	SKDIGSESTEDQAMEDIK	84647240
sp|P02662|CASA1_BOVIN" tr|B5B3R8|B5B3R8_BOVIN"	HQGLPQEVLNENLLRF	636.3426+++	3	636.343	HQGLPQEVLNENLLRF	37329280
sp|P02662|CASA1_BOVIN" tr|B5B3R8|B5B3R8_BOVIN"	YKVPQLEIVPNSAEERLHSM	589.8046++++	4	589.805	YKVPQLEIVPNSAEERLHSM[+16]	100346488
sp|P02662|CASA1_BOVIN" tr|B5B3R8|B5B3R8_BOVIN"	VAPFPEVFGKEKVNELSKD	1067.0650++ 711.7124+++ 534.0361++++	2 3 4	1067.064962 711.7124 534.036119	VAPFPEVFGKEKVNELSKD	10621651408
sp|P02662|CASA1_BOVIN" tr|B5B3R8|B5B3R8_BOVIN"	KEGIHAQQKEPMIGVNQELA	555.7915++++	4	555.791	KEGIHAQQKEPMIGVNQELA	241010096
sp|P02662|CASA1_BOVIN" tr|B5B3R8|B5B3R8_BOVIN"	VAPFPEVFGKEK	674.3690++ 449.9151+++	2 3	674.368995 449.915089	VAPFPEVFGKEK	2473504064
sp|P02662|CASA1_BOVIN" tr|B5B3R8|B5B3R8_BOVIN"	FVAPFPEVFGKEKVNELS	1019.0382++ 679.6946+++	2 3	1019.038216 679.694569	FVAPFPEVFGKEKVNELS	678104368
sp|P02662|CASA1_BOVIN" tr|B5B3R8|B5B3R8_BOVIN"	KVPQLEIVPNSAEERLHSMK	597.0554++++	4	597.055	KVPQLEIVPNS[+80]AEERLHSMK	54975712
sp|P02662|CASA1_BOVIN" tr|B5B3R8|B5B3R8_BOVIN"	GKEKVNELSKDIGSESTED	1112.9665++	2	1112.97	GKEKVNELSKDIGS[+80]ES[+80]TED	158854752
sp|P02662|CASA1_BOVIN" tr|B5B3R8|B5B3R8_BOVIN"	EKVNELSKDIGSESTEDQAMEDIK	952.4029+++	3	952.403	EKVNELSKDIGS[+80]ES[+80]TEDQAMEDIK	126735504
sp|P02662|CASA1_BOVIN" tr|B5B3R8|B5B3R8_BOVIN"	APFPEVFGKEK	416.8923+++	3	416.892	APFPEVFGKEK	475683840
sp|P02662|CASA1_BOVIN" tr|B5B3R8|B5B3R8_BOVIN"	IGSESTEDQAMEDIKQMEAESISSSEEIVPNSVEQK	1318.9367+++ 989.4543++++	3 4	1318.936665 989.454318	IGSESTEDQAMEDIKQMEAESISSSEEIVPNSVEQK	121872864
sp|P02662|CASA1_BOVIN" tr|B5B3R8|B5B3R8_BOVIN"	DVPSERYLGYLEQL	841.4252++	2	841.425	DVPSERYLGYLEQL	86475304
sp|P02662|CASA1_BOVIN" tr|B5B3R8|B5B3R8_BOVIN"	KEGIHAQQKEPMIGVNQELAY	795.0740+++ 596.5573++++	3 4	795.074003 596.557321	KEGIHAQQKEPMIGVNQELAY	554549488
sp|P02662|CASA1_BOVIN" tr|B5B3R8|B5B3R8_BOVIN"	LPQEVLNENLLRF	792.9408++	2	792.941	LPQEVLNENLLRF	71541480
sp|P02662|CASA1_BOVIN" tr|B5B3R8|B5B3R8_BOVIN"	GKEKVNELSKDIGSESTED	742.3135+++	3	742.313	GKEKVNELSKDIGSES[+80]T[+80]ED	405139808
sp|P02662|CASA1_BOVIN" tr|B5B3R8|B5B3R8_BOVIN"	EGIHAQQKEPMIGVNQELA	698.0212+++	3	698.021	EGIHAQQKEPMIGVNQELA	245447552
sp|P02662|CASA1_BOVIN" tr|B5B3R8|B5B3R8_BOVIN"	IVPNSAEERLH	422.2263+++	3	422.226	IVPNSAEERLH	58268404
sp|P02662|CASA1_BOVIN" tr|B5B3R8|B5B3R8_BOVIN"	KHPIKHQGLPQ	641.8726++	2	641.873	KHPIKHQGLPQ	9494014
sp|P02662|CASA1_BOVIN" tr|B5B3R8|B5B3R8_BOVIN"	FFVAPFPEVFGKEKVNEL	699.7067+++	3	699.707	FFVAPFPEVFGKEKVNEL	23038258
sp|P02662|CASA1_BOVIN" tr|B5B3R8|B5B3R8_BOVIN"	FVAPFPEVFGKEKVNELSKDIGSESTEDQAMEDIK	1019.2149++++	4	1019.21	FVAPFPEVFGKEKVNELS[+80]KDIGS[+80]ESTEDQAMEDIK	61282248
sp|P02662|CASA1_BOVIN" tr|B5B3R8|B5B3R8_BOVIN"	IKQMEAESISSSEEIVPNSVEQK	860.0899+++	3	860.09	IKQM[+16]EAESISSSEEIVPNSVEQK	118833072
sp|P02662|CASA1_BOVIN" tr|B5B3R8|B5B3R8_BOVIN"	SEEIVPNSVEQK	719.8267++	2	719.827	S[+80]EEIVPNSVEQK	117724320
sp|P02662|CASA1_BOVIN" tr|B5B3R8|B5B3R8_BOVIN"	VNELSKDIGSESTED	891.8396++	2	891.84	VNELSKDIGS[+80]ES[+80]TED	298018464
sp|P02662|CASA1_BOVIN" tr|B5B3R8|B5B3R8_BOVIN"	FFVAPFPEVFGKEK	547.9607+++	3	547.961	FFVAPFPEVFGKEK	46255896
sp|P02662|CASA1_BOVIN" tr|B5B3R8|B5B3R8_BOVIN"	KHQGLPQEVLNENLLRF	509.5325++++	4	509.533	KHQGLPQEVLNENLLRF	32274320
sp|P02662|CASA1_BOVIN" tr|B5B3R8|B5B3R8_BOVIN"	LNENLLRFF	583.3218++	2	583.322	LNENLLRFF	40974912
sp|P02662|CASA1_BOVIN" tr|B5B3R8|B5B3R8_BOVIN"	FFVAPFPEVFGK	692.8686++	2	692.869	FFVAPFPEVFGK	8576650
sp|P02662|CASA1_BOVIN" tr|B5B3R8|B5B3R8_BOVIN"	GKEKVNELSKDIGSESTED	715.6580+++	3	715.658	GKEKVNELSKDIGSES[+80]TED	250899104
sp|P02662|CASA1_BOVIN" tr|B5B3R8|B5B3R8_BOVIN"	NELSKDIGSESTED	802.3222++	2	802.322	NELSKDIGSES[+80]TED	315574368
sp|P02662|CASA1_BOVIN" tr|B5B3R8|B5B3R8_BOVIN"	YKVPQLEIVPNSAEER	651.3223+++	3	651.322	YKVPQLEIVPNS[+80]AEER	32613872
sp|P02662|CASA1_BOVIN" tr|B5B3R8|B5B3R8_BOVIN"	KYKVPQLEIVPNSAEERLH	583.3031++++	4	583.303	KYKVPQLEIVPNS[+80]AEERLH	45472276
sp|P02662|CASA1_BOVIN" tr|B5B3R8|B5B3R8_BOVIN"	HPIKHQGLPQEVL	499.2842+++	3	499.284	HPIKHQGLPQEVL	37945292
sp|P02662|CASA1_BOVIN" tr|B5B3R8|B5B3R8_BOVIN"	FFVAPFPEVFGKEKV	580.9835+++	3	580.984	FFVAPFPEVFGKEKV	14354676
sp|P02662|CASA1_BOVIN" tr|B5B3R8|B5B3R8_BOVIN"	EKVNELSKD	531.2773++	2	531.277	EKVNELSKD	12025842
sp|P02662|CASA1_BOVIN" tr|B5B3R8|B5B3R8_BOVIN"	EEIVPNSVEQK	676.3107++	2	676.311	EEIVPNS[+80]VEQK	97349872
sp|P02662|CASA1_BOVIN" tr|B5B3R8|B5B3R8_BOVIN"	EIVPNSAEERLHSM	537.9314+++	3	537.931	EIVPNSAEERLHSM	106237152
sp|P02663|CASA2_BOVIN"	LNREQLSTSEENSKKTVDMESTEVFTK	803.3773++++	4	803.377	LNREQLST[+80]SEENSKKTVDMESTEVFTK	1020398336
sp|P02663|CASA2_BOVIN"	TKKTKLTEEEKNRLNFL	523.7995++++	4	523.799	TKKTKLTEEEKNRLNFL	1061559552
sp|P02663|CASA2_BOVIN"	LYQGPIVLNPWD	707.8719++	2	707.872	LYQGPIVLNPWD	795216896
sp|P02663|CASA2_BOVIN"	MESTEVFTKKTK	503.5737+++	3	503.574	MES[+80]TEVFTKKTK	768952192
sp|P02663|CASA2_BOVIN"	NAVPITPTLNREQLSTSEENSKKTVDMESTEVFTK	1335.3117+++ 1001.7356++++ 1335.3117+++	3 4 3	1335.311717 1001.735607 1335.311717	NAVPITPT[+80]LNREQLSTSEENSKKTVDMESTEVFTK NAVPIT[+80]PTLNREQLSTSEENSKKTVDMESTEVFTK	4742823872
sp|P02663|CASA2_BOVIN"	TKLTEEEKNRLNFL	867.9729++ 578.9843+++	2 3	867.972876 578.984342	TKLTEEEKNRLNFL	1939956736
sp|P02663|CASA2_BOVIN"	LNREQLSTSEENSKKTVD	1079.5048++ 720.0056+++	2 3	1079.504812 720.005633	LNREQLSTS[+80]EENSKKTVD	3774663568
sp|P02663|CASA2_BOVIN"	KNTMEHVSSSEESIISQETYKQEK	743.8213++++	4	743.821	KNTMEHVSS[+80]S[+80]EESIISQETYKQEK	2500698624
sp|P02663|CASA2_BOVIN"	NAVPITPTLNREQLSTSEENSKKTVDMESTEVFTK	1021.7272++++	4	1021.73	NAVPIT[+80]PTLNREQLS[+80]TSEENSKKTVDMESTEVFTK	1277657472
sp|P02663|CASA2_BOVIN"	MESTEVFTKK	640.2856++	2	640.286	MES[+80]TEVFTKK	1939390848
sp|P02663|CASA2_BOVIN"	YQKFPQYLQY	689.3455++	2	689.346	YQKFPQYLQY	1544936832
sp|P02663|CASA2_BOVIN"	KNTMEHVSSSEESIISQETYKQEK	991.4259+++ 991.4259+++ 743.8213++++	3 3 4	991.425919 991.425919 743.821259	KNTMEHVS[+80]SSEESIIS[+80]QETYKQEK KNTMEHVS[+80]S[+80]SEESIISQETYKQEK	8057494528
sp|P02663|CASA2_BOVIN"	ESIISQETYKQEK	831.8848++	2	831.885	ESIIS[+80]QETYKQEK	244752112
sp|P02663|CASA2_BOVIN"	NAVPITPTLNRE	662.8646++	2	662.865	NAVPITPTLNRE	2100439296
sp|P02663|CASA2_BOVIN"	KNTMEHVSSSEESIISQETYK	1214.0708++ 809.7163+++ 607.5391++++	2 3 4	1214.070843 809.716321 607.53906	KNTMEHVSSSEESIISQETYK	9619233856
sp|P02663|CASA2_BOVIN"	TKLTEEEKNRLNFLK	932.0204++ 621.6827+++ 466.5138++++	2 3 4	932.020357 621.682663 466.513817	TKLTEEEKNRLNFLK	4641850880
sp|P02663|CASA2_BOVIN"	KNTMEHVSSSEESIISQE	678.9810+++	3	678.981	KNTMEHVSSSEESIISQE	336808960
sp|P02663|CASA2_BOVIN"	KNTMEHVSSSEESIISQETYKQEK	964.7705+++ 723.8297++++ 723.8297++++	3 4 4	964.770476 723.829676 723.829676	KNT[+80]MEHVSSSEESIISQETYKQEK KNTMEHVSS[+80]SEESIISQETYKQEK	14466041856
sp|P02663|CASA2_BOVIN"	ALNEINQFYQKFPQYLQY	1154.0759++ 769.7197+++	2 3	1154.075861 769.719666	ALNEINQFYQKFPQYLQY	576420224
sp|P02663|CASA2_BOVIN"	LNREQLSTSEENSKKTVDMESTEVFTKK	835.4010++++	4	835.401	LNREQLST[+80]SEENSKKTVDMESTEVFTKK	480846720
sp|P02663|CASA2_BOVIN"	TKLTEEEKNRLNF	811.4308++ 541.2897+++	2 3	811.430844 541.289654	TKLTEEEKNRLNF	5638333120
sp|P02663|CASA2_BOVIN"	KTKLTEEEKNRLNF	583.9880+++ 438.2428++++	3 4	583.987975 438.242801	KTKLTEEEKNRLNF	4666934528
sp|P02663|CASA2_BOVIN"	KTVDMESTEVFTK	532.2405+++	3	532.241	KTVDMES[+80]TEVFTK	274243232
sp|P02663|CASA2_BOVIN"	YQGPIVLNPWD	651.3299++	2	651.33	YQGPIVLNPWD	26105744
sp|P02663|CASA2_BOVIN"	NREQLSTSEENSKKTVD	682.3109+++	3	682.311	NREQLSTS[+80]EENSKKTVD	211025024
sp|P02663|CASA2_BOVIN"	KTKLTEEEKNRLNFLK	664.3810+++ 498.5376++++	3 4	664.380984 498.537557	KTKLTEEEKNRLNFLK	2264066304
sp|P02663|CASA2_BOVIN"	KNTMEHVSSSEESIISQETYKQE	1342.6214++ 895.4167+++ 671.8144++++	2 3 4	1342.621429 895.416711 671.814352	KNTMEHVSSSEESIISQETYKQE	7067824608
sp|P02663|CASA2_BOVIN"	KNTMEHVSSSEESIISQETYKQE	922.0722+++ 922.0722+++	3 3	922.072155 922.072155	KNTMEHVSSSEESIIS[+80]QETYKQE KNTMEHVSSS[+80]EESIISQETYKQE	2187624960
sp|P02663|CASA2_BOVIN"	TVDMESTEVFTKK	505.5851+++	3	505.585	TVDMESTEVFTKK	558243328
sp|P02663|CASA2_BOVIN"	TKKTKLTEEEKNRLN	611.3461+++ 458.7614++++	3 4	611.346051 458.761357	TKKTKLTEEEKNRLN	318788576
sp|P02663|CASA2_BOVIN"	KLTEEEKNRL	420.5700+++	3	420.57	KLTEEEKNRL	18616264
sp|P02663|CASA2_BOVIN"	KNTMEHVSSSEESIISQETYKQEK	1018.0814+++	3	1018.08	KNTMEHVSS[+80]S[+80]EESIIS[+80]QETYKQEK	1415682688
sp|P02663|CASA2_BOVIN"	KNTMEHVSSSEESIISQETYKQEK	1018.0814+++ 1018.0814+++	3 3	1018.081363 1018.081363	KNTMEHVS[+80]S[+80]SEESIIS[+80]QETYKQEK KNTMEHVS[+80]S[+80]S[+80]EESIISQETYKQEK	2831365376
sp|P02663|CASA2_BOVIN"	LYQGPIVLNPWDQVKR	963.5334++ 642.6914+++	2 3	963.533435 642.691382	LYQGPIVLNPWDQVKR	864040368
sp|P02663|CASA2_BOVIN"	SIISQETYKQEK	485.2560+++	3	485.256	SIISQETYKQEK	169044336
sp|P02663|CASA2_BOVIN"	KNTMEHVSSSEESIISQETYKQEK	1446.6521++ 964.7705+++ 723.8297++++	2 3 4	1446.652076 964.770476 723.829676	KNTMEHVSSSEESIIS[+80]QETYKQEK	4500695040
sp|P02663|CASA2_BOVIN"	KNTMEHVSSSEESIISQETYKQEK	964.7705+++	3	964.77	KNTMEHVS[+80]SSEESIISQETYKQEK	4500695040
sp|P02663|CASA2_BOVIN"	NAVPITPTLNREQLSTSEENSKKTVD	1476.2215++	2	1476.22	NAVPITPTLNREQLS[+80]TSEENSKKTVD	323231232
sp|P02663|CASA2_BOVIN"	VKITVDDKHYQK	369.2070++++	4	369.207	VKITVDDKHYQK	222043168
sp|P02663|CASA2_BOVIN"	DKHYQKALNEINQF	874.4417++ 583.2969+++	2 3	874.441743 583.29692	DKHYQKALNEINQF	2403077952
sp|P02663|CASA2_BOVIN"	LNREQLSTSEENSKKTVD	693.3502+++ 520.2645++++	3 4	693.35019 520.264461	LNREQLSTSEENSKKTVD	837939168
sp|P02663|CASA2_BOVIN"	IISQETYKQEK	723.8474++	2	723.847	IIS[+80]QETYKQEK	186460064
sp|P02663|CASA2_BOVIN"	KHYQKALNEIN	453.2456+++	3	453.246	KHYQKALNEIN	156791648
sp|P02663|CASA2_BOVIN"	MESTEVFTKKT	434.2200+++	3	434.22	MESTEVFTKKT	554954112
sp|P02663|CASA2_BOVIN"	LNREQLSTSEENSKKTVDMESTEVFTKKTK	892.6867++++	4	892.687	LNREQLS[+80]TSEENSKKTVDMESTEVFTKKTK	50241020
sp|P02663|CASA2_BOVIN"	MESTEVFTKKTK	714.8738++ 476.9183+++ 357.9405++++	2 3 4	714.873784 476.918282 357.94053	MESTEVFTKKTK	921281012
sp|P02663|CASA2_BOVIN"	KTKLTEEEKNRLN	801.9441++ 534.9652+++ 401.4757++++	2 3 4	801.944118 534.965171 401.475697	KTKLTEEEKNRLN	2245964536
sp|P02663|CASA2_BOVIN"	KNTMEHVSSSEESIISQETYK	863.0272+++	3	863.027	KNTMEHVSS[+80]SEESIIS[+80]QETYK	805268480
sp|P02663|CASA2_BOVIN"	KTKLTEEEKNRL	744.9227++ 496.9509+++ 372.9650++++	2 3 4	744.922654 496.950862 372.964965	KTKLTEEEKNRL	1244498506
sp|P02663|CASA2_BOVIN"	RYQKFALPQY	657.3537++ 438.5715+++	2 3	657.353679 438.571545	RYQKFALPQY	2789424640
sp|P02663|CASA2_BOVIN"	TKVIPYVRY	380.2255+++	3	380.225	TKVIPYVRY	426584672
sp|P02663|CASA2_BOVIN"	KTKLTEEEKNRLNFL	932.0204++ 621.6827+++	2 3	932.020357 621.682663	KTKLTEEEKNRLNFL	8815609088
sp|P02663|CASA2_BOVIN"	LYQGPIVLNPWDQVK	885.4829++ 590.6577+++	2 3	885.482879 590.657678	LYQGPIVLNPWDQVK	565096988
sp|P02663|CASA2_BOVIN"	REQLSTSEENSKKTVD	644.2966+++	3	644.297	REQLSTS[+80]EENSKKTVD	37665336
sp|P02663|CASA2_BOVIN"	NAVPITPTLNREQLSTSEENSKKTVDMESTEVFTK	1308.6563+++	3	1308.66	NAVPITPTLNREQLSTSEENSKKTVDMESTEVFTK	258728784
sp|P02663|CASA2_BOVIN"	MESTEVFTK	576.2381++	2	576.238	MES[+80]TEVFTK	1936709120
sp|P02663|CASA2_BOVIN"	KNTMEHVSSSEESIISQETYK	1254.0540++ 836.3718+++ 836.3718+++	2 3 3	1254.054009 836.371765 836.371765	KNTMEHVSSS[+80]EESIISQETYK KNTMEHVSSSEESIIS[+80]QETYK KNTMEHVSS[+80]SEESIISQETYK	7700730848
sp|P02663|CASA2_BOVIN"	TKLTEEEKNRL	680.8752++ 454.2525+++	2 3	680.875173 454.252541	TKLTEEEKNRL	1049452792
sp|P02663|CASA2_BOVIN"	ALPQYLKTVY	598.3397++	2	598.34	ALPQYLKTVY	139283168
sp|P02663|CASA2_BOVIN"	RNAVPITPTLNREQLSTSEENSKKTVD	1063.1726+++ 797.6313++++	3 4	1063.172582 797.631256	RNAVPITPTLNREQLS[+80]TS[+80]EENSKKTVD RNAVPITPTLNREQLS[+80]T[+80]SEENSKKTVD	982680992
sp|P02663|CASA2_BOVIN"	YQGPIVLNPWDQVK	828.9408++	2	828.941	YQGPIVLNPWDQVK	61400072
sp|P02663|CASA2_BOVIN"	YLKTVYQHQ	393.8767+++	3	393.877	YLKTVYQHQ	33192368
sp|P02663|CASA2_BOVIN"	KNTMEHVSSSEESIISQETYK	889.6827+++ 889.6827+++	3 3	889.682652 889.682652	KNTMEHVSS[+80]S[+80]EES[+80]IISQETYK KNTMEHVS[+80]S[+80]S[+80]EESIISQETYK	1299028608
sp|P02663|CASA2_BOVIN"	EVKITVDDKHYQK	401.4676++++	4	401.468	EVKITVDDKHYQK	221456800
sp|P02663|CASA2_BOVIN"	NAVPITPTLNR	598.3433++	2	598.343	NAVPITPTLNR	984767872
sp|P02663|CASA2_BOVIN"	MESTEVFTKK	600.3025++ 400.5374+++	2 3	600.302464 400.537401	MESTEVFTKK	1566400896
sp|P02663|CASA2_BOVIN"	KNTMEHVSSSEESIISQETYK	815.0480+++	3	815.048	KNTM[+16]EHVSSSEESIISQETYK	438678368
sp|P02663|CASA2_BOVIN"	TKKTKLTEEEKNRL	430.2506++++	4	430.251	TKKTKLTEEEKNRL	240827504
sp|P02663|CASA2_BOVIN"	KKISQRYQKFALPQY	633.3597+++	3	633.36	KKISQRYQKFALPQY	278734912
sp|P02663|CASA2_BOVIN"	KNTMEHVSSSEESIISQETYKQE	900.7483+++ 675.8131++++	3 4	900.748349 675.813081	KNTM[+16]EHVSSSEESIISQETYKQE	610482528
sp|P02663|CASA2_BOVIN"	MESTEVFTK	536.2550++	2	536.255	MESTEVFTK	2370318080
sp|P02663|CASA2_BOVIN"	MESTEVFTKKTKLTEEEKNRLN	912.4489+++ 684.5885++++	3 4	912.448897 684.588492	MES[+80]TEVFTKKTKLTEEEKNRLN	743027744
sp|P02663|CASA2_BOVIN"	MEHVSSSEESIISQETYKQEK	850.3753+++	3	850.375	MEHVSSSEESIIS[+80]QETYKQEK	133552528
sp|P02663|CASA2_BOVIN"	KHYQKALNEINQF	816.9283++	2	816.928	KHYQKALNEINQF	1055485056
sp|P02663|CASA2_BOVIN"	MEHVSSSEESIISQETYKQE	781.0215+++	3	781.022	MEHVSSSEESIISQETYKQE	2191808256
sp|P02663|CASA2_BOVIN"	TKKTKLTEEEKNRLNF	660.3689+++ 495.5285++++	3 4	660.368856 495.528461	TKKTKLTEEEKNRLNF	825739968
sp|P02663|CASA2_BOVIN"	LNREQLSTSEENSKKTVDMESTEVFTK	783.3857++++	4	783.386	LNREQLSTSEENSKKTVDMESTEVFTK	484729440
sp|P02663|CASA2_BOVIN"	KNTMEHVSSSEESIISQETYKQEK	1406.6689++ 938.1150+++ 703.8381++++	2 3 4	1406.66891 938.115032 703.838093	KNTMEHVSSSEESIISQETYKQEK	29674011552
sp|P02663|CASA2_BOVIN"	ENSKKTVDMESTEVFTKK	546.0091++++	4	546.009	ENS[+80]KKTVDMESTEVFTKK	80407024
sp|P02663|CASA2_BOVIN"	AVPITPTLNREQLSTSEENSKKTVDMESTEVFTK	973.2249++++	4	973.225	AVPITPTLNREQLS[+80]TSEENSKKTVDMESTEVFTK	94498976
sp|P02663|CASA2_BOVIN"	LNREQLSTSEENSKKTVDMESTEVFTKKT	860.6629++++	4	860.663	LNREQLST[+80]SEENSKKTVDMESTEVFTKKT	83526000
sp|P02663|CASA2_BOVIN"	KNTMEHVSSSEESIISQETYKQEKN	732.3488++++	4	732.349	KNTMEHVSSSEESIISQETYKQEKN	74345464
sp|P02663|CASA2_BOVIN"	NAVPITPTLNREQLSTSEENSK	1214.6193++ 810.0820+++	2 3	1214.619349 810.081992	NAVPITPTLNREQLSTSEENSK	2066238976
sp|P02663|CASA2_BOVIN"	EVKITVDDKHYQ	369.4439++++	4	369.444	EVKITVDDKHYQ	98196288
sp|P02663|CASA2_BOVIN"	TKLTEEEKNRLNFLKK	664.3810+++ 498.5376++++	3 4	664.380984 498.537557	TKLTEEEKNRLNFLKK	909674656
sp|P02663|CASA2_BOVIN"	MEHVSSSEESIISQETYKQEK	823.7198+++	3	823.72	MEHVSSSEESIISQETYKQEK	321817984
sp|P02663|CASA2_BOVIN"	MESTEVFTKKTKLTEEEK	540.2792++++	4	540.279	MESTEVFTKKTKLTEEEK	92692096
sp|P02663|CASA2_BOVIN"	KTVDMESTEVFTKKTK	651.3197+++ 488.7416++++	3 4	651.319725 488.741613	KTVDMES[+80]TEVFTKKTK	522307328
sp|P02663|CASA2_BOVIN"	KNTMEHVSSSEESIISQETY	772.3496+++	3	772.35	KNTM[+16]EHVSSSEESIISQETY	222655776
sp|P02663|CASA2_BOVIN"	KTVDMESTEVFTKK	548.2834+++	3	548.283	KTVDMESTEVFTKK	497313344
sp|P02663|CASA2_BOVIN"	LTEEEKNRLNFL	753.4016++ 502.6035+++	2 3	753.401555 502.603462	LTEEEKNRLNFL	407013536
sp|P02663|CASA2_BOVIN"	KNTMEHVSSSEESIISQETY	1150.0234++	2	1150.02	KNTMEHVSSSEESIISQETY	305192608
sp|P02663|CASA2_BOVIN"	LNREQLSTSEENSKKT	621.9851+++	3	621.985	LNREQLSTSEENSKKT	29284720
sp|P02663|CASA2_BOVIN"	KNTMEHVSSSEESIISQE	1057.9510++	2	1057.95	KNTMEHVSSSEESIIS[+80]QE	90741624
sp|P02663|CASA2_BOVIN"	ENSKKTVDMESTEVFTKK	526.0175++++	4	526.017	ENSKKTVDMESTEVFTKK	140513488
sp|P02663|CASA2_BOVIN"	RNAVPITPTLNREQLSTSEENSKKTVDME	842.6604++++	4	842.66	RNAVPITPTLNREQLS[+80]TSEENSKKTVDME	97901472
sp|P02663|CASA2_BOVIN"	FALPQYLKT	540.8080++	2	540.808	FALPQYLKT	114120232
sp|P02663|CASA2_BOVIN"	VSSSEESIISQETYKQEK	691.3392+++	3	691.339	VSSSEESIISQETYKQEK	136830336
sp|P02663|CASA2_BOVIN"	KTVDMESTEVFTKK	574.9388+++	3	574.939	KTVDMES[+80]TEVFTKK	70359200
sp|P02663|CASA2_BOVIN"	LNREQLSTSEENSKKTVDMESTEVFTK	1070.8339+++	3	1070.83	LNREQLSTS[+80]EENSKKTVDMESTEVFTK	267348736
sp|P02663|CASA2_BOVIN"	NREQLSTSEENSKKTVD	655.6555+++	3	655.656	NREQLSTSEENSKKTVD	31468532
sp|P02663|CASA2_BOVIN"	EEVKITVDDKHYQK	433.7283++++	4	433.728	EEVKITVDDKHYQK	140764208
sp|P02663|CASA2_BOVIN"	KLTEEEKNRLN	458.5843+++	3	458.584	KLTEEEKNRLN	42249384
sp|P02663|CASA2_BOVIN"	TKVIPYVRYL	417.9202+++	3	417.92	TKVIPYVRYL	185430768
sp|P02663|CASA2_BOVIN"	NAVPITPTLNREQL	783.4359++	2	783.436	NAVPITPTLNREQL	1055027456
sp|P02663|CASA2_BOVIN"	KLTEEEKNRLNFL	545.3018+++	3	545.302	KLTEEEKNRLNFL	182898176
sp|P02663|CASA2_BOVIN"	AMKPWIQPK	366.8758+++	3	366.876	AMKPWIQPK	134793040
sp|P02663|CASA2_BOVIN"	ITVDDKHYQKALNEINQF	1088.5553++	2	1088.56	ITVDDKHYQKALNEINQF	9903866
sp|P02663|CASA2_BOVIN"	ALNEINQFY	556.2746++	2	556.275	ALNEINQFY	558282048
sp|P02663|CASA2_BOVIN"	REQLSTSEENSKKTVD	617.6412+++	3	617.641	REQLSTSEENSKKTVD	6719993
sp|P02663|CASA2_BOVIN"	SIISQETYKQEK	767.3635++	2	767.363	SIIS[+80]QETYKQEK	178004368
sp|P02663|CASA2_BOVIN"	KNTMEHVSSSEESIISQETYKQEKNMAINPSKENLCSTFC	1142.0289++++	4	1142.03	KNTMEHVSSSEESIISQETYKQEKNMAINPSKENLCSTFC	68737120
sp|P02663|CASA2_BOVIN"	KNTMEHVSSSEESIISQETYKQEK	943.4467+++ 707.8368++++	3 4	943.44667 707.836822	KNTM[+16]EHVSSSEESIISQETYKQEK	321233840
sp|P02663|CASA2_BOVIN"	SKKTVDMESTEVFTKK	646.6478+++	3	646.648	SKKTVDMES[+80]TEVFTKK	116177920
sp|P02663|CASA2_BOVIN"	LYQGPIVLNPWDQV	821.4354++	2	821.435	LYQGPIVLNPWDQV	24555246
sp|P02666|CASB_BOVIN"	RELEELNVPGEIVESLSSSEESITRINKK	882.1595++++	4	882.16	RELEELNVPGEIVES[+80]LS[+80]S[+80]SEESITRINKK	944898176
sp|P02666|CASB_BOVIN"	KIHPFAQTQS	578.8091++	2	578.809	KIHPFAQTQS	663692544
sp|P02666|CASB_BOVIN"	HKEMPFPKYPVEPF	582.6288+++	3	582.629	HKEMPFPKYPVEPF	191444272
sp|P02666|CASB_BOVIN"	VKEAMAPKHKEMPFPK	467.7535++++	4	467.753	VKEAMAPKHKEMPFPK	600241856
sp|P02666|CASB_BOVIN"	KIEKFQSEEQQQTE	876.4260++ 584.6197+++	2 3	876.425955 584.619729	KIEKFQSEEQQQTE	7563316736
sp|P02666|CASB_BOVIN"	IHPFAQTQSL	571.3037++	2	571.304	IHPFAQTQSL	698247488
sp|P02666|CASB_BOVIN"	IEKFQSEEQQQTED	909.8751++	2	909.875	IEKFQS[+80]EEQQQTED	7925221888
sp|P02666|CASB_BOVIN"	INKKIEKFQSEEQQQTED	1151.5336++	2	1151.53	INKKIEKFQS[+80]EEQQQTED	837196416
sp|P02666|CASB_BOVIN"	RELEELNVPGEIVESLSSSEESITRIN	1063.8248+++	3	1063.82	RELEELNVPGEIVESLSSSEES[+80]IT[+80]RIN	1549784576
sp|P02666|CASB_BOVIN"	RELEELNVPGEIVESLSSSEESITRIN	1063.8248+++ 1063.8248+++ 1063.8248+++	3 3 3	1063.824848 1063.824848 1063.824848	RELEELNVPGEIVESLS[+80]S[+80]SEESITRIN RELEELNVPGEIVES[+80]LSSS[+80]EESITRIN RELEELNVPGEIVES[+80]LS[+80]SSEESITRIN	4649353728
sp|P02666|CASB_BOVIN"	RELEELNVPGEIVESLSSSEESITR	988.1159+++	3	988.116	RELEELNVPGEIVESLSS[+80]S[+80]EESITR	1970132224
sp|P02666|CASB_BOVIN"	RELEELNVPGEIVESLSSSEESITR	988.1159+++ 988.1159+++	3 3	988.115851 988.115851	RELEELNVPGEIVESLS[+80]S[+80]SEESITR RELEELNVPGEIVES[+80]LS[+80]SSEESITR	3940264448
sp|P02666|CASB_BOVIN"	ELQDKIHPFA	599.3168++	2	599.317	ELQDKIHPFA	772234368
sp|P02666|CASB_BOVIN"	KIEKFQSEEQQQTEDELQD	1216.5287++ 811.3549+++	2 3	1216.528681 811.354879	KIEKFQS[+80]EEQQQTEDELQD	70108459008
sp|P02666|CASB_BOVIN"	KIEKFQSEEQQQTEDELQDK	1240.5930++ 827.3978+++ 620.8001++++	2 3 4	1240.592997 827.397757 620.800137	KIEKFQSEEQQQTEDELQDK	20826565760
sp|P02666|CASB_BOVIN"	KIEKFQSEEQQQTED	933.9394++ 622.9620+++	2 3	933.939427 622.962043	KIEKFQSEEQQQTED	147967741952
sp|P02666|CASB_BOVIN"	INKKIEKFQSEE	786.8871++	2	786.887	INKKIEKFQS[+80]EE	24712908
sp|P02666|CASB_BOVIN"	KIEKFQSEEQQQTEDELQD	1176.5455++ 784.6994+++	2 3	1176.545516 784.699436	KIEKFQSEEQQQTEDELQD	31212770816
sp|P02666|CASB_BOVIN"	MAPKHKEMPFPK	480.9212+++	3	480.921	MAPKHKEMPFPK	209505856
sp|P02666|CASB_BOVIN"	KIEKFQSEEQQQTEDELQ	1159.0152++ 773.0126+++	2 3	1159.01521 773.012565	KIEKFQS[+80]EEQQQTEDELQ	5415363328
sp|P02666|CASB_BOVIN"	KKIEKFQSEEQQQTED	1037.9701++	2	1037.97	KKIEKFQS[+80]EEQQQTED	368663136
sp|P02666|CASB_BOVIN"	EMPFPKYPVEPFTESQSLTLTD	1278.6144++	2	1278.61	EMPFPKYPVEPFTESQSLTLTD	179665792
sp|P02666|CASB_BOVIN"	RELEELNVPGEIVESLSSSEE	1213.0545++	2	1213.05	RELEELNVPGEIVESLSS[+80]SEE	846345344
sp|P02666|CASB_BOVIN"	RELEELNVPGEIVESLSSSEESITRINK	1106.5232+++	3	1106.52	RELEELNVPGEIVESLS[+80]S[+80]SEESITRINK	2248810752
sp|P02666|CASB_BOVIN"	KKIEKFQSEEQQQT	610.9593+++	3	610.959	KKIEKFQS[+80]EEQQQT	105418576
sp|P02666|CASB_BOVIN"	VSKVKEAMAPKHK	484.9500+++ 363.9643++++	3 4	484.950027 363.96434	VSKVKEAMAPKHK	416586992
sp|P02666|CASB_BOVIN"	INKKIEKFQSE	455.2575+++	3	455.258	INKKIEKFQSE	50952992
sp|P02666|CASB_BOVIN"	KIEKFQSEEQQQTEDE	998.4607++ 665.9762+++	2 3	998.460723 665.976241	KIEKFQSEEQQQTEDE	1961585760
sp|P02666|CASB_BOVIN"	IEKFQSEEQQQTEDELQD	1152.4812++	2	1152.48	IEKFQS[+80]EEQQQTEDELQD	1262808576
sp|P02666|CASB_BOVIN"	KIEKFQSEEQQQ	507.9230+++	3	507.923	KIEKFQSEEQQQ	122309136
sp|P02666|CASB_BOVIN"	RELEELNVPGEIVESLSSSEE	1213.0545++ 809.0388+++	2 3	1213.054532 809.03878	RELEELNVPGEIVESLS[+80]SSEE	1192577024
sp|P02666|CASB_BOVIN"	KIEKFQSEEQQQTEDELQ	1119.0320++ 746.3571+++	2 3	1119.032044 746.357121	KIEKFQSEEQQQTEDELQ	4397136512
sp|P02666|CASB_BOVIN"	HKEMPFPKYPVEPFTESQSL	803.0595+++	3	803.059	HKEM[+16]PFPKYPVEPFTESQSL	248852736
sp|P02666|CASB_BOVIN"	HKEMPFPKYPVEPFTESQS	760.0331+++ 570.2767++++	3 4	760.033145 570.276677	HKEMPFPKYPVEPFTESQS	1194658656
sp|P02666|CASB_BOVIN"	AVPYPQRDMPIQAF	816.9138++	2	816.914	AVPYPQRDMPIQAF	700204608
sp|P02666|CASB_BOVIN"	KIEKFQSEEQQQTEDELQDKIHPFAQTQ	871.4082++++	4	871.408	KIEKFQS[+80]EEQQQTEDELQDKIHPFAQTQ	343000000
sp|P02666|CASB_BOVIN"	SSSEESITRINK	755.8129++	2	755.813	S[+80]S[+80]SEESITRINK	643551936
sp|P02666|CASB_BOVIN"	RELEELNVPGEIVESLSSSEE	1253.0377++	2	1253.04	RELEELNVPGEIVESLSS[+80]S[+80]EE	1879548160
sp|P02666|CASB_BOVIN"	RELEELNVPGEIVESLSSSEE	1253.0377++	2	1253.04	RELEELNVPGEIVESLS[+80]S[+80]SEE	1879548160
sp|P02666|CASB_BOVIN"	KIHPFAQTQSL	635.3511++ 423.9032+++	2 3	635.351137 423.903183	KIHPFAQTQSL	6777800704
sp|P02666|CASB_BOVIN"	GVSKVKEAMAPK	622.8552++ 415.5726+++	2 3	622.855198 415.572557	GVSKVKEAMAPK	6818254336
sp|P02666|CASB_BOVIN"	RELEELNVPGEIVESLSSSEE	809.0388+++	3	809.039	RELEELNVPGEIVES[+80]LSSSEE	347104960
sp|P02666|CASB_BOVIN"	RELEELNVPGEIVESLSSSEESITRINKK	842.1764++++	4	842.176	RELEELNVPGEIVES[+80]LSSSEESITRINKK	55486872
sp|P02666|CASB_BOVIN"	SITRINKKIEK	443.9453+++	3	443.945	SITRINKKIEK	232824528
sp|P02666|CASB_BOVIN"	VENLHLPLPLLQ	693.4112++	2	693.411	VENLHLPLPLLQ	1361950592
sp|P02666|CASB_BOVIN"	SLSQSKVLPVPQKAVPYPQRD	779.7690+++ 585.0786++++	3 4	779.76902 585.078584	SLSQSKVLPVPQKAVPYPQRD	2446349184
sp|P02666|CASB_BOVIN"	KIEKFQSEEQQQT	811.9047++	2	811.905	KIEKFQSEEQQQT	100300016
sp|P02666|CASB_BOVIN"	ESITRINKKIEK	486.9595+++	3	486.959	ESITRINKKIEK	117467728
sp|P02666|CASB_BOVIN"	KIEKFQSEEQQQT	851.8878++ 568.2610+++	2 3	851.887824 568.260975	KIEKFQS[+80]EEQQQT	1073861184
sp|P02666|CASB_BOVIN"	ELQDKIHPF	563.7982++ 376.2012+++	2 3	563.798206 376.201229	ELQDKIHPF	4258681600
sp|P02666|CASB_BOVIN"	KIEKFQSEEQQQTEDEL	1094.9859++ 730.3264+++	2 3	1094.985921 730.326373	KIEKFQS[+80]EEQQQTEDEL	672288944
sp|P02666|CASB_BOVIN"	VMGVSKVKEAMAPKHK	580.6601+++ 435.7469++++	3 4	580.660148 435.74693	VMGVSKVKEAMAPKHK	2004576800
sp|P02666|CASB_BOVIN"	RELEELNVPGEIVESLSSSEES	1216.5874++ 811.3940+++	2 3	1216.58738 811.394012	RELEELNVPGEIVESLSSSEES	960092224
sp|P02666|CASB_BOVIN"	INKKIEKFQSE	722.3658++	2	722.366	INKKIEKFQS[+80]E	20991710
sp|P02666|CASB_BOVIN"	KIEKFQSEEQQQTED	973.9226++ 973.9226++ 649.6175+++	2 2 3	973.922592 973.922592 649.617487	KIEKFQSEEQQQT[+80]ED KIEKFQS[+80]EEQQQTED	280857591808
sp|P02666|CASB_BOVIN"	NKKIEKFQSEEQQQTED	1055.0084++ 703.6747+++ 528.0078++++	2 3 4	1055.008372 703.674673 528.007824	NKKIEKFQSEEQQQTED	2522752432
sp|P02666|CASB_BOVIN"	IEKFQSEEQQQTEDE	934.4132++	2	934.413	IEKFQSEEQQQTEDE	107017928
sp|P02666|CASB_BOVIN"	EVMGVSKVKEAMAPK	540.6214+++	3	540.621	EVMGVSKVKEAM[+16]APK	60983888
sp|P02666|CASB_BOVIN"	IEKFQSEEQQQTED	869.8919++ 580.2637+++	2 3	869.891945 580.263722	IEKFQSEEQQQTED	8845940160
sp|P02666|CASB_BOVIN"	ELQDKIHPFAQTQS	821.4152++	2	821.415	ELQDKIHPFAQTQS	3290764288
sp|P02666|CASB_BOVIN"	IEKFQSEEQQQTE	852.3616++	2	852.362	IEKFQS[+80]EEQQQTE	629513024
sp|P02666|CASB_BOVIN"	LQPEVMGVSKVKEAMAPK	486.2680++++	4	486.268	LQPEVMGVSKVKEAMAPK	192981152
sp|P02666|CASB_BOVIN"	IEKFQSEEQQQTEDELQD	1112.4980++ 742.0011+++	2 3	1112.498034 742.001115	IEKFQSEEQQQTEDELQD	2313413760
sp|P02666|CASB_BOVIN"	GVSKVKEAMAPKH	691.3847++ 461.2589+++	2 3	691.384654 461.258861	GVSKVKEAMAPKH	1351269816
sp|P02666|CASB_BOVIN"	RELEELNVPGEIVESLSSSEESITRINK	1079.8677+++	3	1079.87	RELEELNVPGEIVESLS[+80]SSEESITRINK	331970880
sp|P02666|CASB_BOVIN"	IEKFQSEEQQQTE	812.3785++	2	812.378	IEKFQSEEQQQTE	554992192
sp|P02666|CASB_BOVIN"	RELEELNVPGEIVESLSSSEESITRINK	1079.8677+++ 810.1526++++	3 4	1079.867725 810.152613	RELEELNVPGEIVES[+80]LSSSEESITRINK	736529856
sp|P02666|CASB_BOVIN"	ELQDKIHPFAQTQ	777.8992++ 518.9352+++	2 3	777.899179 518.935212	ELQDKIHPFAQTQ	4355971328
sp|P02666|CASB_BOVIN"	VMGVSKVKEAMAPK	497.6072+++ 373.4572++++ 497.6072+++	3 4 3	497.607162 373.45719 497.607162	VMGVSKVKEAM[+16]APK VM[+16]GVSKVKEAMAPK	1240061696
sp|P02666|CASB_BOVIN"	RELEELNVPGEIVESL	953.4639++ 635.9784+++	2 3	953.463896 635.978356	RELEELNVPGEIVES[+80]L	6972512800
sp|P02666|CASB_BOVIN"	RELEELNVPGEIVESLS	956.9967++	2	956.997	RELEELNVPGEIVESLS	235525392
sp|P02666|CASB_BOVIN"	VVPPFLQPEVMGVSKVKE	661.7043+++	3	661.704	VVPPFLQPEVMGVSKVKE	39024404
sp|P02666|CASB_BOVIN"	KIEKFQSEEQQQTEDELQDK	1280.5762++ 854.0532+++ 640.7917++++	2 3 4	1280.576163 854.0532 640.791719	KIEKFQS[+80]EEQQQTEDELQDK	19933759104
sp|P02666|CASB_BOVIN"	RELEELNVPGEIVE	813.4227++ 542.6175+++	2 3	813.422684 542.617548	RELEELNVPGEIVE	11545586032
sp|P02666|CASB_BOVIN"	VLPVPQKAVPYPQRD	853.9830++ 569.6578+++	2 3	853.983046 569.65779	VLPVPQKAVPYPQRD	6517902592
sp|P02666|CASB_BOVIN"	KIEKFQSEEQQQTEDE	1038.4439++ 692.6317+++	2 3	1038.443889 692.631685	KIEKFQS[+80]EEQQQTEDE	2247172864
sp|P02666|CASB_BOVIN"	VMGVSKVKEAMAPK	737.9096++ 492.2755+++ 369.4585++++	2 3 4	737.909647 492.275523 369.458461	VMGVSKVKEAMAPK	6052668128
sp|P02666|CASB_BOVIN"	RELEELNVPGEIVESLSSSEESITRINK	1053.2123+++ 790.1610++++	3 4	1053.212282 790.16103	RELEELNVPGEIVESLSSSEESITRINK	318596256
sp|P02666|CASB_BOVIN"	SKVKEAMAPKHKEMPFPK	521.5352++++	4	521.535	SKVKEAMAPKHKEMPFPK	54037052
sp|P02666|CASB_BOVIN"	RELEELNVPGEIVESLSSSEESITRINK	1106.5232+++ 830.1442++++	3 4	1106.523169 830.144196	RELEELNVPGEIVES[+80]LS[+80]SSEESITRINK	3708846848
sp|P02666|CASB_BOVIN"	VMGVSKVKEAMAPKHK	585.9918+++ 439.7457++++	3 4	585.991787 439.745659	VMGVSKVKEAM[+16]APKHK	325468108
sp|P02666|CASB_BOVIN"	SLSQSKVLPVPQKAVPYPQRDMPIQAF	1008.8828+++	3	1008.88	SLSQSKVLPVPQKAVPYPQRDMPIQAF	141496128
sp|P02666|CASB_BOVIN"	EKFQSEEQQQTED	853.3331++	2	853.333	EKFQS[+80]EEQQQTED	68943128
sp|P02666|CASB_BOVIN"	KFQSEEQQQTEDELQDK	703.9906+++	3	703.991	KFQSEEQQQTEDELQDK	285590176
sp|P02666|CASB_BOVIN"	HKEMPFPKYPVEPFTESQSL	797.7278+++ 598.5477++++	3 4	797.727833 598.547693	HKEMPFPKYPVEPFTESQSL	1398304832
sp|P02666|CASB_BOVIN"	INKKIEKFQSEEQQQTED	1111.5504++ 741.3694+++ 556.2788++++	2 3 4	1111.550404 741.369361 556.27884	INKKIEKFQSEEQQQTED	5300410272
sp|P02666|CASB_BOVIN"	IEKFQSEEQQQT	787.8403++	2	787.84	IEKFQS[+80]EEQQQT	65253048
sp|P02666|CASB_BOVIN"	NKKIEKFQSEEQQQTED	1094.9915++	2	1094.99	NKKIEKFQS[+80]EEQQQTED	127167384
sp|P02666|CASB_BOVIN"	RELEELNVPGEIVESLSSSEESITR	1441.6870++ 961.4604+++	2 3	1441.686973 961.460407	RELEELNVPGEIVES[+80]LSSSEESITR	843905442
sp|P02666|CASB_BOVIN"	RELEELNVPGEIVESLSSSEE	1173.0714++ 782.3833+++	2 3	1173.071366 782.383336	RELEELNVPGEIVESLSSSEE	1234300864
sp|P02666|CASB_BOVIN"	VENLHLPLP	516.2978++	2	516.298	VENLHLPLP	2387300096
sp|P02666|CASB_BOVIN"	RELEELNVPGEIVESLSS	1000.5128++	2	1000.51	RELEELNVPGEIVESLSS	58784520
sp|P02666|CASB_BOVIN"	RINKKIEKFQSEE	576.9609+++	3	576.961	RINKKIEKFQS[+80]EE	62605228
sp|P02666|CASB_BOVIN"	KIHPFAQTQ	535.2931++	2	535.293	KIHPFAQTQ	308233728
sp|P02666|CASB_BOVIN"	RELEELNVPGEIVESLSSSEESITRIN	1037.1694+++ 1037.1694+++ 1037.1694+++	3 3 3	1037.169404 1037.169404 1037.169404	RELEELNVPGEIVESLSSS[+80]EESITRIN RELEELNVPGEIVESLSS[+80]SEESITRIN RELEELNVPGEIVESLS[+80]SSEESITRIN	1541411904
sp|P02666|CASB_BOVIN"	KKIEKFQSEEQQQTEDELQD	1280.5762++ 854.0532+++	2 3	1280.576163 854.0532	KKIEKFQS[+80]EEQQQTEDELQD	1403023632
sp|P02666|CASB_BOVIN"	INKKIEKFQSEEQQQTEDELQD	903.1068+++ 677.5819++++	3 4	903.106754 677.581884	INKKIEKFQSEEQQQTEDELQD	1732868224
sp|P02666|CASB_BOVIN"	EESITRINKKIEK	529.9737+++	3	529.974	EESITRINKKIEK	50457612
sp|P02666|CASB_BOVIN"	VENLHLPLPLLQS	736.9272++	2	736.927	VENLHLPLPLLQS	125488992
sp|P02666|CASB_BOVIN"	RELEELNVPGEIVESLSSSEESITR	961.4604+++ 961.4604+++	3 3	961.460407 961.460407	RELEELNVPGEIVESLSSS[+80]EESITR RELEELNVPGEIVESLSS[+80]SEESITR	606339840
sp|P02666|CASB_BOVIN"	RELEELNVPGEIVESLSSSEESITR	961.4604+++	3	961.46	RELEELNVPGEIVESLS[+80]SSEESITR	303169920
sp|P02666|CASB_BOVIN"	SQSKVLPVPQKAVPYPQRDMPIQAF	942.1775+++ 706.8849++++	3 4	942.177461 706.884915	SQSKVLPVPQKAVPYPQRDMPIQAF	238670368
sp|P02666|CASB_BOVIN"	VLPVPQKAVPYPQRDMPIQAF	798.7716+++	3	798.772	VLPVPQKAVPYPQRDMPIQAF	818205376
sp|P02666|CASB_BOVIN"	KKIEKFQSEEQQQTED	997.9869++ 665.6604+++	2 3	997.986908 665.660364	KKIEKFQSEEQQQTED	641582788
sp|P02666|CASB_BOVIN"	KKIEKFQSEEQQQTE	980.4566++	2	980.457	KKIEKFQS[+80]EEQQQTE	25990070
sp|P02666|CASB_BOVIN"	VSKVKEAMAPKH	442.2517+++	3	442.252	VSKVKEAMAPKH	126625360
sp|P02666|CASB_BOVIN"	VMGVSKVKEAMAPKH	537.9618+++ 403.7232++++	3 4	537.961827 403.723189	VMGVSKVKEAMAPKH	1991242432
sp|P02666|CASB_BOVIN"	PEVMGVSKVKEAMAPK	429.9810++++ 429.9810++++	4 4	429.981029 429.981029	PEVMGVSKVKEAM[+16]APK PEVM[+16]GVSKVKEAMAPK	1548880000
sp|P02666|CASB_BOVIN"	KIEKFQSEEQQQTEDELQDKIHPF	1018.8079+++ 764.3578++++	3 4	1018.807918 764.357758	KIEKFQS[+80]EEQQQTEDELQDKIHPF	1276165312
sp|P02666|CASB_BOVIN"	DKIHPFAQTQSL	692.8646++	2	692.865	DKIHPFAQTQSL	288947968
sp|P02666|CASB_BOVIN"	AMAPKHKEMPFPK	504.6002+++ 378.7020++++	3 4	504.60023 378.701991	AMAPKHKEMPFPK	652790704
sp|P02666|CASB_BOVIN"	KKIEKFQSEEQQQTE	627.3180+++	3	627.318	KKIEKFQSEEQQQTE	41280508
sp|P02666|CASB_BOVIN"	YQEPVLGPVRGPFPI	834.9590++	2	834.959	YQEPVLGPVRGPFPI	146493760
sp|P02666|CASB_BOVIN"	VLPVPQKAVPYPQRDMPIQA	749.7488+++	3	749.749	VLPVPQKAVPYPQRDMPIQA	296620416
sp|P02666|CASB_BOVIN"	SEEQQQTEDELQDK	893.8544++	2	893.854	S[+80]EEQQQTEDELQDK	70425880
sp|P02666|CASB_BOVIN"	SSEESITRINK	712.2969++	2	712.297	S[+80]S[+80]EESITRINK	1244647936
sp|P02666|CASB_BOVIN"	INKKIEKFQSEEQQQTEDELQDK	972.4605+++ 729.5972++++	3 4	972.460519 729.597208	INKKIEKFQS[+80]EEQQQTEDELQDK	893484000
sp|P02666|CASB_BOVIN"	PEVMGVSKVKEAMAPK	567.6406+++ 425.9823++++	3 4	567.640642 425.982301	PEVMGVSKVKEAMAPK	1288470080
sp|P02666|CASB_BOVIN"	LSLSQSKVLPVPQKAVPYPQRDMPIQAF	1046.5775+++	3	1046.58	LSLSQSKVLPVPQKAVPYPQRDMPIQAF	20842242
sp|P02666|CASB_BOVIN"	VMGVSKVKEAMAPK	502.9388+++ 377.4559++++	3 4	502.9388 377.455919	VM[+16]GVSKVKEAM[+16]APK	152244344
sp|P02666|CASB_BOVIN"	HKEMPFPKYPVE	501.2551+++	3	501.255	HKEMPFPKYPVE	1694163968
sp|P02666|CASB_BOVIN"	INKKIEKFQSEEQQ	583.6441+++	3	583.644	INKKIEKFQSEEQQ	48958080
sp|P02666|CASB_BOVIN"	GVSKVKEAMAPKHK	755.4321++ 503.9572+++ 378.2197++++	2 3 4	755.432135 503.957182 378.219706	GVSKVKEAMAPKHK	3722767338
sp|P02666|CASB_BOVIN"	MGVSKVKEAMAPKH	378.9561++++	4	378.956	MGVSKVKEAMAPKH	42540464
sp|P02666|CASB_BOVIN"	KIEKFQSEEQQQTEDELQDKIHPFAQT	839.3936++++	4	839.394	KIEKFQS[+80]EEQQQTEDELQDKIHPFAQT	153807360
sp|P02666|CASB_BOVIN"	KIEKFQSEEQQQTEDELQDKIHPF	744.3662++++	4	744.366	KIEKFQSEEQQQTEDELQDKIHPF	561709888
sp|P02666|CASB_BOVIN"	EVMGVSKVKEAMAPK	545.9530+++	3	545.953	EVM[+16]GVSKVKEAM[+16]APK	24782556
sp|P02666|CASB_BOVIN"	NKKIEKFQSEEQQQTE	665.3324+++	3	665.332	NKKIEKFQSEEQQQTE	106746128
sp|P02666|CASB_BOVIN"	EMPFPKYPVEPFTESQS	1006.9691++	2	1006.97	EMPFPKYPVEPFTESQS	73463664
sp|P02666|CASB_BOVIN"	SLSQSKVLPVPQ	641.8719++	2	641.872	SLSQSKVLPVPQ	582659008
sp|P02666|CASB_BOVIN"	KIEKFQSEEQQ	697.3515++	2	697.352	KIEKFQSEEQQ	20406452
sp|P02666|CASB_BOVIN"	KIEKFQSEEQQQTEDELQDKIHPFA	1042.4870+++ 782.1170++++	3 4	1042.486956 782.117036	KIEKFQS[+80]EEQQQTEDELQDKIHPFA	491243744
sp|P02666|CASB_BOVIN"	VLPVPQKAVPYPQRDMPIQAF	804.1032+++	3	804.103	VLPVPQKAVPYPQRDM[+16]PIQAF	377416576
sp|P02666|CASB_BOVIN"	PVEPFTESQSLTLTD	832.4067++	2	832.407	PVEPFTESQSLTLTD	873795968
sp|P02666|CASB_BOVIN"	KIEKFQSEEQQQTEDELQDKIH	937.4342+++ 703.3275++++	3 4	937.434192 703.327463	KIEKFQS[+80]EEQQQTEDELQDKIH	892541296
sp|P02666|CASB_BOVIN"	HKEMPFPKY	392.8672+++	3	392.867	HKEMPFPKY	725961984
sp|P02666|CASB_BOVIN"	KIEKFQSEEQQQ	801.3640++	2	801.364	KIEKFQS[+80]EEQQQ	433056512
sp|P02666|CASB_BOVIN"	INKKIEKFQSEE	498.2717+++	3	498.272	INKKIEKFQSEE	67791000
sp|P02666|CASB_BOVIN"	HKEMPFPKYPVEPFTESQSLTLTD	706.0993++++	4	706.099	HKEMPFPKYPVEPFTESQSLTLTD	155679712
sp|P02666|CASB_BOVIN"	RELEELNVPGEIVESLSSSEESITRINKK	1175.8769+++ 1175.8769+++	3 3	1175.876934 1175.876934	RELEELNVPGEIVESLS[+80]S[+80]S[+80]EESITRINKK RELEELNVPGEIVES[+80]LS[+80]SS[+80]EESITRINKK	609989632
sp|P02666|CASB_BOVIN"	SSSEESITRINK	450.9002+++	3	450.9	SSSEESITRINK	16550984
sp|P02666|CASB_BOVIN"	MPFPKYPVEPFTESQS	942.4478++	2	942.448	MPFPKYPVEPFTESQS	133732576
sp|P02666|CASB_BOVIN"	PEVMGVSKVKEAMAPKH	460.2470++++	4	460.247	PEVMGVSKVKEAMAPKH	101065632
sp|P02666|CASB_BOVIN"	RELEELNVPGEIVESLSSSEESITR	1401.7038++ 934.8050+++ 701.3555++++	2 3 4	1401.703807 934.804963 701.355542	RELEELNVPGEIVESLSSSEESITR	2196880568
sp|P02666|CASB_BOVIN"	INKKIEKFQSEEQQQ	626.3303+++	3	626.33	INKKIEKFQSEEQQQ	25676612
sp|P02666|CASB_BOVIN"	IEKFQSEEQQQTEDELQDK	1176.5455++ 784.6994+++	2 3	1176.545516 784.699436	IEKFQSEEQQQTEDELQDK	2370379840
sp|P02666|CASB_BOVIN"	DKIHPFAQTQS	636.3226++	2	636.323	DKIHPFAQTQS	85596632
sp|P02666|CASB_BOVIN"	RELEELNVPGEIVESLSSSEESITRINKKIEK	934.7318++++	4	934.732	RELEELNVPGEIVES[+80]LSSSEESITRINKKIEK	19271960
sp|P02666|CASB_BOVIN"	RELEELNVPGEIVESLS	996.9799++ 996.9799++	2 2	996.97991 996.97991	RELEELNVPGEIVESLS[+80] RELEELNVPGEIVES[+80]LS	281724992
sp|P02666|CASB_BOVIN"	RELEELNVPGEIVESLSSSE	1108.5501++	2	1108.55	RELEELNVPGEIVESLSSSE	84637328
sp|P02666|CASB_BOVIN"	ELQDKIHPFAQ	663.3461++	2	663.346	ELQDKIHPFAQ	278500800
sp|P02666|CASB_BOVIN"	RELEELNVPGEIVESLSS	1040.4959++	2	1040.5	RELEELNVPGEIVESLS[+80]S	51704972
sp|P02666|CASB_BOVIN"	KAVPYPQRDMPIQAF	587.6433+++	3	587.643	KAVPYPQRDMPIQAF	300076448
sp|P02666|CASB_BOVIN"	GVSKVKEAMAPK	630.8527++ 420.9042+++	2 3	630.852655 420.904195	GVSKVKEAM[+16]APK	127142734
sp|P02666|CASB_BOVIN"	FQSEEQQQTEDELQDK	991.4347++ 661.2922+++	2 3	991.434706 661.292229	FQSEEQQQTEDELQDK	1062812752
sp|P02666|CASB_BOVIN"	RELEELNVPGEIVES	896.9219++ 598.2837+++	2 3	896.921864 598.283668	RELEELNVPGEIVES[+80]	1315117768
sp|P02666|CASB_BOVIN"	MGVSKVKEAMAPK	464.5844+++	3	464.584	MGVSKVKEAM[+16]APK	49072044
sp|P02666|CASB_BOVIN"	RELEELNVPGEIVESLS	1036.9631++ 691.6445+++	2 3	1036.963076 691.644476	RELEELNVPGEIVES[+80]LS[+80]	1041224968
sp|P02666|CASB_BOVIN"	FQSEEQQQTEDELQD	927.3872++	2	927.387	FQSEEQQQTEDELQD	342354816
sp|P02666|CASB_BOVIN"	SEESITRINKKIEK	585.6398+++	3	585.64	S[+80]EESITRINKKIEK	344640768
sp|P02666|CASB_BOVIN"	VKEAMAPKHKEMPFPK	471.7522++++ 471.7522++++	4 4	471.752213 471.752213	VKEAMAPKHKEM[+16]PFPK VKEAM[+16]APKHKEMPFPK	170308656
sp|P02666|CASB_BOVIN"	IEKFQSEEQQQTEDELQ	1054.9846++	2	1054.98	IEKFQSEEQQQTEDELQ	244649264
sp|P02666|CASB_BOVIN"	HKEMPFPKYPVEPFTESQ	731.0225+++	3	731.022	HKEMPFPKYPVEPFTESQ	212962560
sp|P02666|CASB_BOVIN"	VMGVSKVKEAMAPKH	543.2935+++ 407.7219++++ 543.2935+++ 407.7219++++	3 4 3 4	543.293466 407.721918 543.293466 407.721918	VMGVSKVKEAM[+16]APKH VM[+16]GVSKVKEAMAPKH	810987072
sp|P02666|CASB_BOVIN"	EPVLGPVRGPFPII	745.9401++	2	745.94	EPVLGPVRGPFPII	48899016
sp|P02666|CASB_BOVIN"	NVPGEIVESLSSSEESITRIN	754.0483+++	3	754.048	NVPGEIVESLSSSEESITRIN	43924712
sp|P02666|CASB_BOVIN"	TPVVVPPFLQPEVMGVSKVK	717.7464+++	3	717.746	TPVVVPPFLQPEVMGVSKVK	5021445
sp|P02666|CASB_BOVIN"	FQSEEQQQTEDELQDK	1031.4179++	2	1031.42	FQS[+80]EEQQQTEDELQDK	314563424
sp|P02666|CASB_BOVIN"	RELEELNVPGEIVESLSSSEE	1253.0377++ 835.6942+++	2 3	1253.037697 835.694223	RELEELNVPGEIVES[+80]LS[+80]SSEE	233728120
sp|P02666|CASB_BOVIN"	VLPVPQKAVPYPQR	531.3155+++	3	531.315	VLPVPQKAVPYPQR	164912848
sp|P02666|CASB_BOVIN"	MPIQAFL	410.2253++	2	410.225	MPIQAFL	425266400
sp|P02666|CASB_BOVIN"	RELEELNVPGEIVESLSSSEESITRINKK	822.1848++++	4	822.185	RELEELNVPGEIVESLSSSEESITRINKK	66037560
sp|P02666|CASB_BOVIN"	RELEELNVPGEIVESLSSSEESITRIN	1090.4803+++	3	1090.48	RELEELNVPGEIVES[+80]LS[+80]S[+80]SEESITRIN	61359584
sp|P02666|CASB_BOVIN"	LQPEVMGVSKVKEAMAPKH	520.5327++++	4	520.533	LQPEVMGVSKVKEAMAPKH	195892016
sp|P02666|CASB_BOVIN"	MPFPKYPVEPFTESQSL	666.3290+++	3	666.329	MPFPKYPVEPFTESQSL	33452516
sp|P02666|CASB_BOVIN"	YQEPVLGPVRGPFP	778.4170++	2	778.417	YQEPVLGPVRGPFP	45461112
sp|P02666|CASB_BOVIN"	NVPGEIVESLSSSEESITR	678.3393+++	3	678.339	NVPGEIVESLSSSEESITR	41262780
sp|P02666|CASB_BOVIN"	SSSEESITRINK	795.7961++	2	795.796	S[+80]S[+80]S[+80]EESITRINK	228742752
sp|P02666|CASB_BOVIN"	KKIEKFQSEEQQQTEDELQDK	896.7515+++	3	896.752	KKIEKFQS[+80]EEQQQTEDELQDK	152579120
sp|P02666|CASB_BOVIN"	EVMGVSKVKEAMAPK	535.2897+++	3	535.29	EVMGVSKVKEAMAPK	295487104
sp|P02666|CASB_BOVIN"	SEEQQQTEDELQDK	853.8712++	2	853.871	SEEQQQTEDELQDK	109237360
sp|P02666|CASB_BOVIN"	MGVSKVKEAMAPK	459.2527+++	3	459.253	MGVSKVKEAMAPK	155003584
sp|P02666|CASB_BOVIN"	VMGVSKVKEAMAPKHK	591.3234+++	3	591.323	VM[+16]GVSKVKEAM[+16]APKHK	16728206
sp|P02666|CASB_BOVIN"	RELEELNVPGEIVESLSSSEESITR	1014.7713+++ 1014.7713+++	3 3	1014.771294 1014.771294	RELEELNVPGEIVES[+80]LS[+80]SS[+80]EESITR RELEELNVPGEIVES[+80]LS[+80]S[+80]SEESITR	107578432
sp|P02666|CASB_BOVIN"	RELEELNVPGEIV	748.9014++	2	748.901	RELEELNVPGEIV	145624416
sp|P02666|CASB_BOVIN"	EMPFPKYPVEPFTESQSLTLTD	1286.6118++	2	1286.61	EM[+16]PFPKYPVEPFTESQSLTLTD	27459196
sp|P02666|CASB_BOVIN"	SLSQSKVLPVPQK	705.9194++ 470.9487+++	2 3	705.919383 470.948681	SLSQSKVLPVPQK	1492314400
sp|P02666|CASB_BOVIN"	NKKIEKFQSEEQQQTE	691.9878+++	3	691.988	NKKIEKFQS[+80]EEQQQTE	187140400
sp|P02666|CASB_BOVIN"	VLPVPQKAVPYPQ	718.4190++	2	718.419	VLPVPQKAVPYPQ	137603008
sp|P02666|CASB_BOVIN"	RELEELNVPGEIVESLSSSEESITRINK	1133.1786+++ 1133.1786+++ 850.1358++++	3 3 4	1133.178613 1133.178613 850.135779	RELEELNVPGEIVES[+80]LS[+80]SS[+80]EESITRINK RELEELNVPGEIVES[+80]LS[+80]S[+80]SEESITRINK	27565867008
sp|P02666|CASB_BOVIN"	RELEELNVPGEIVESLSSS	1044.0288++	2	1044.03	RELEELNVPGEIVESLSSS	42062180
sp|P02666|CASB_BOVIN"	KIEKFQSEEQQQTEDELQDKIHPFAQTQS	1190.5526+++	3	1190.55	KIEKFQS[+80]EEQQQTEDELQDKIHPFAQTQS	9483468
sp|P02666|CASB_BOVIN"	EMPFPKYPVEPFTE	855.9078++	2	855.908	EMPFPKYPVEPFTE	12773216
sp|P02666|CASB_BOVIN"	NKKIEKFQSEEQQQTEDELQDK	701.3262++++	4	701.326	NKKIEKFQS[+80]EEQQQTEDELQDK	35999024
sp|P02666|CASB_BOVIN"	RELEELNVPGEIVESLSSSE	1148.5332++	2	1148.53	RELEELNVPGEIVESLS[+80]SSE	77987744
sp|P02666|CASB_BOVIN"	VMGVSKVKEAMAP	673.8622++	2	673.862	VMGVSKVKEAMAP	767735552
sp|P02666|CASB_BOVIN"	PVEPFTESQSLTLTDVENL	1060.0257++ 707.0196+++	2 3	1060.025699 707.019558	PVEPFTESQSLTLTDVENL	7875585
sp|P02666|CASB_BOVIN"	RELEELNVPGEIVESLSS	1080.4791++	2	1080.48	RELEELNVPGEIVES[+80]LS[+80]S	11401992
sp|P02666|CASB_BOVIN"	RELEELNVPGEIVESLSSSEESITRINK	1133.1786+++	3	1133.18	RELEELNVPGEIVESLS[+80]S[+80]S[+80]EESITRINK	13884813312
sp|P02666|CASB_BOVIN"	KIEKFQSEEQQQTEDELQDKIHPFAQTQSL	1228.2473+++	3	1228.25	KIEKFQS[+80]EEQQQTEDELQDKIHPFAQTQSL	104106680
sp|P02666|CASB_BOVIN"	KKIEKFQSEEQQ	534.5905+++	3	534.591	KKIEKFQS[+80]EEQQ	95617176
sp|P02666|CASB_BOVIN"	RELEELNVPGEIVESLSSSEESIT	936.0821+++	3	936.082	RELEELNVPGEIVESLS[+80]S[+80]SEESIT	9632792
sp|P02666|CASB_BOVIN"	GVSKVKEAMAPKHKE	546.9714+++ 410.4804++++	3 4	546.97138 410.480354	GVSKVKEAMAPKHKE	64587252
sp|P02666|CASB_BOVIN"	LTQTPVVVPPFLQPEVMGVSKVKEAM	714.8867++++	4	714.887	LTQTPVVVPPFLQPEVM[+16]GVSKVKEAM[+16]	1235987328
sp|P02666|CASB_BOVIN"	KAVPYPQRDMPIQ	514.9414+++	3	514.941	KAVPYPQRDMPIQ	156243344
sp|P02666|CASB_BOVIN"	VKEAMAPKHKEMPFPKY	677.6900+++ 508.5193++++	3 4	677.689996 508.519316	VKEAMAPKHKEMPFPKY	306048040
sp|P02666|CASB_BOVIN"	RELEELNVPGEIVESLSSSEESIT	1363.6364++ 909.4267+++	2 3	1363.636417 909.426703	RELEELNVPGEIVES[+80]LSSSEESIT	8250723
sp|P02668|CASK_BOVIN"	SPPEINTVQVTSTAV	771.9041++	2	771.904	SPPEINTVQVTSTAV	2885710848
sp|P02668|CASK_BOVIN"	MAIPPKKNQDKTEIPTINTIASGEPTSTPTTEAVESTVATLED	1132.3231++++	4	1132.32	MAIPPKKNQDKTEIPTINTIASGEPTSTPTTEAVESTVATLED	83115425792
sp|P02668|CASK_BOVIN"	SPEVIESPPEINTVQVTSTAV	1139.0485++ 759.7014+++	2 3	1139.048521 759.701439	S[+80]PEVIESPPEINTVQVTSTAV	53849229312
sp|P02668|CASK_BOVIN"	KTEIPTINTIASGEPTSTPTTEAVESTVATLED	1161.8886+++ 1161.8886+++ 1161.8886+++	3 3 3	1161.888632 1161.888632 1161.888632	KTEIPTINTIASGEPTSTPT[+80]TEAVESTVATLED KTEIPTINTIASGEPTST[+80]PTTEAVESTVATLED KTEIPTINTIAS[+80]GEPTSTPTTEAVESTVATLED	2891640768
sp|P02668|CASK_BOVIN"	MAIPPKKNQDKTEIPTINTIASGEPTSTPTTEAVESTVATLED	1152.3147++++	4	1152.31	MAIPPKKNQDKTEIPTINT[+80]IASGEPTSTPTTEAVESTVATLED	10432528384
sp|P02668|CASK_BOVIN"	SPEVIESPPEINTVQVTST	1014.0126++	2	1014.01	SPEVIESPPEINTVQVTST	946331584
sp|P02668|CASK_BOVIN"	KTEIPTINTIASGEPTSTPTTEAVESTVATLE	1096.8909+++	3	1096.89	KTEIPTINTIASGEPTSTPTTEAVESTVATLE	520642208
sp|P02668|CASK_BOVIN"	INTVQVTSTAV	566.8141++	2	566.814	INTVQVTSTAV	2442568448
sp|P02668|CASK_BOVIN"	ARHPHPHLSF	400.2125+++	3	400.212	ARHPHPHLSF	3740328192
sp|P02668|CASK_BOVIN"	RFFSDKIAKY	425.5679+++	3	425.568	RFFSDKIAKY	157616928
sp|P02668|CASK_BOVIN"	SPEVIESPPEINTVQVTSTAV	1099.0654++ 733.0460+++	2 3	1099.065356 733.045996	SPEVIESPPEINTVQVTSTAV	12316332032
sp|P02668|CASK_BOVIN"	ERFFSDKIAKY	702.3695++ 468.5821+++ 351.6884++++	2 3 4	702.369526 468.58211 351.688401	ERFFSDKIAKY	23720795392
sp|P02668|CASK_BOVIN"	KTEIPTINTIASGEPTSTPTTEAVESTVATLED	1135.2332+++ 851.6767++++	3 4	1135.233188 851.67671	KTEIPTINTIASGEPTSTPTTEAVESTVATLED	9544038912
sp|P02668|CASK_BOVIN"	PEVIESPPEINTVQVTSTAV	1055.5493++ 704.0353+++	2 3	1055.549341 704.03532	PEVIESPPEINTVQVTSTAV	3316841728
sp|P02668|CASK_BOVIN"	VLSRYPSYGLNYYQQKPVAL	787.0863+++	3	787.086	VLSRYPSYGLNYYQQKPVAL	129263360
sp|P02668|CASK_BOVIN"	SPEVIESPPEINTVQVTST	1053.9958++ 702.9996+++	2 3	1053.995757 702.999597	S[+80]PEVIESPPEINTVQVTST	8208044416
sp|P02668|CASK_BOVIN"	SNTVPAKSCQAQPTTM	832.3925++	2	832.393	SNTVPAKSCQAQPTTM	846244736
sp|P02668|CASK_BOVIN"	EVIESPPEINTVQVTSTAV	1007.0230++ 671.6844+++	2 3	1007.022959 671.684398	EVIESPPEINTVQVTSTAV	4091876672
sp|P02668|CASK_BOVIN"	PTSTPTTEAVESTVATLED	974.9653++ 650.3126+++	2 3	974.965307 650.31263	PTSTPTTEAVESTVATLED	2351358720
sp|P02668|CASK_BOVIN"	MAIPPKKNQDKTEIPTINTIASGEPTSTPTTEAVESTVATLEDSPE	1230.5965++++	4	1230.6	MAIPPKKNQDKTEIPTINTIASGEPTSTPTTEAVESTVATLEDS[+80]PE	986185920
sp|P02668|CASK_BOVIN"	MAIPPKKNQDKTEIPTINTIASGE	871.4582+++	3	871.458	M[+16]AIPPKKNQDKTEIPTINTIASGE	2505545728
sp|P02668|CASK_BOVIN"	MAIPPKKNQDKTEIPTINTIASG	828.4440+++	3	828.444	M[+16]AIPPKKNQDKTEIPTINTIASG	539997184
sp|P02668|CASK_BOVIN"	VLSRYPSYGLNYY	797.8986++	2	797.899	VLSRYPSYGLNYY	615337920
sp|P02668|CASK_BOVIN"	VIESPPEINTVQVTSTAV	942.5017++ 628.6702+++	2 3	942.501663 628.670201	VIESPPEINTVQVTSTAV	2514531648
sp|P02668|CASK_BOVIN"	SNTVPAKSCQAQPTTM	840.3900++	2	840.39	SNTVPAKSCQAQPTTM[+16]	21142592
sp|P02668|CASK_BOVIN"	MAIPPKKNQDKTEIPTINTIASGE	866.1265+++ 649.8467++++	3 4	866.126544 649.846727	MAIPPKKNQDKTEIPTINTIASGE	5001457664
sp|P02668|CASK_BOVIN"	MAIPPKKNQD	571.3053++ 381.2060+++	2 3	571.305341 381.205986	MAIPPKKNQD	3969433344
sp|P02668|CASK_BOVIN"	SPEVIESPPEINTVQVT	959.9559++	2	959.956	S[+80]PEVIESPPEINTVQVT	589587136
sp|P02668|CASK_BOVIN"	ESPPEINTVQVTSTAV	836.4254++	2	836.425	ESPPEINTVQVTSTAV	196355568
sp|P02668|CASK_BOVIN"	KTEIPTINTIASGEPTSTPTTEAVESTVATLE	1123.5463+++	3	1123.55	KTEIPTINTIAS[+80]GEPTSTPTTEAVESTVATLE	41704824
sp|P02668|CASK_BOVIN"	KTEIPTINTIASGEPTSTPTTEAVESTVATL	1053.8767+++	3	1053.88	KTEIPTINTIASGEPTSTPTTEAVESTVATL	51204256
sp|P02668|CASK_BOVIN"	IPTINTIASGEPTSTPTTEAVESTVATLED	1015.8381+++	3	1015.84	IPTINTIASGEPTSTPTTEAVESTVATLED	82627904
sp|P02668|CASK_BOVIN"	EPTSTPTTEAVESTVATLED	1039.4866++	2	1039.49	EPTSTPTTEAVESTVATLED	271277664
sp|P02668|CASK_BOVIN"	DKTEIPTINTIASGEPTSTPTTEAVESTVATLED	1173.5755+++	3	1173.58	DKTEIPTINTIASGEPTSTPTTEAVESTVATLED	19246890
sp|P02668|CASK_BOVIN"	TMARHPHPHLSF	482.9068+++	3	482.907	TM[+16]ARHPHPHLSF	141700736
sp|P02668|CASK_BOVIN"	SPPEINTVQVTST	686.8514++	2	686.851	SPPEINTVQVTST	666815808
sp|P02668|CASK_BOVIN"	MAIPPKKNQDKTEIPTINTIAS	603.3307++++	4	603.331	MAIPPKKNQDKTEIPTINTIAS	1404223104
sp|P02668|CASK_BOVIN"	FFSDKIAKY	373.5342+++	3	373.534	FFSDKIAKY	117461632
sp|P02668|CASK_BOVIN"	MAIPPKKNQDKTEIPTINT	713.7208+++	3	713.721	MAIPPKKNQDKTEIPTINT	2936681472
sp|P02668|CASK_BOVIN"	MAIPPKKNQDKTEIPTINTIASGEPTSTPTTEAVESTVATL	1071.3057++++	4	1071.31	MAIPPKKNQDKTEIPTINTIASGEPTSTPTTEAVESTVATL	815912192
sp|P02668|CASK_BOVIN"	SFMAIPPKKNQD	459.2395+++	3	459.239	SFMAIPPKKNQD	156192640
sp|P02668|CASK_BOVIN"	TMARHPHPHLSF	477.5752+++	3	477.575	TMARHPHPHLSF	493539072
sp|P02668|CASK_BOVIN"	VIESPPEINTVQVTST	857.4489++	2	857.449	VIESPPEINTVQVTST	229294960
sp|P02668|CASK_BOVIN"	NTVQVTSTAV	510.2720++	2	510.272	NTVQVTSTAV	160182320
sp|P02668|CASK_BOVIN"	SPEVIESPPEINTVQVTSTA	1089.5143++	2	1089.51	S[+80]PEVIESPPEINTVQVTSTA	366183072
sp|P02668|CASK_BOVIN"	PPEINTVQVTSTAV	728.3881++	2	728.388	PPEINTVQVTSTAV	793889920
sp|P02668|CASK_BOVIN"	IASGEPTSTPTTEAVESTVATLED	1203.5739++ 802.7184+++	2 3	1203.573939 802.718384	IASGEPTSTPTTEAVESTVATLED	126024104
sp|P02668|CASK_BOVIN"	NYYQQKPVAL	612.3246++	2	612.325	NYYQQKPVAL	169786848
sp|P02668|CASK_BOVIN"	SRYPSYGLNYYQQKPVAL	716.3689+++	3	716.369	SRYPSYGLNYYQQKPVAL	35006464
sp|P02668|CASK_BOVIN"	KTEIPTINTIASGEPTSTPTTEAVESTVATLEDSPE	1266.2644+++ 949.9501++++ 949.9501++++	3 4 4	1266.264427 949.950139 949.950139	KTEIPTINTIASGEPTSTPTTEAVESTVATLEDS[+80]PE KTEIPTINTIASGEPTST[+80]PTTEAVESTVATLEDSPE	186207284
sp|P02668|CASK_BOVIN"	MAIPPKKNQDKTEIPTINTIASGEPTSTPTTEAVESTVATLED	1536.0838+++	3	1536.08	MAIPPKKNQDKTEIPT[+80]INTIASGEPTSTPTTEAVESTVATLED	247517952
sp|P02668|CASK_BOVIN"	ERFFSDKIAK	620.8379++ 414.2277+++	2 3	620.837862 414.227667	ERFFSDKIAK	3294058784
sp|P02668|CASK_BOVIN"	SPEVIESPPEINTVQVTSTAV	1179.0317++ 786.3569+++	2 3	1179.031687 786.356883	S[+80]PEVIESPPEINTVQVT[+80]STAV S[+80]PEVIESPPEINT[+80]VQVTSTAV	119201581
sp|P02668|CASK_BOVIN"	MAIPPKKNQDK	423.9043+++	3	423.904	MAIPPKKNQDK	9800814
sp|P02668|CASK_BOVIN"	MAIPPKKNQDKTEIPTINTIASGEPTSTPTTEAVESTVATLED	1514.7600+++ 1136.3218++++	3 4	1514.760015 1136.32183	M[+16]AIPPKKNQDKTEIPTINTIASGEPTSTPTTEAVESTVATLED	12902817664
sp|P02668|CASK_BOVIN"	INNQFLPYPYYAKPA	899.9618++	2	899.962	INNQFLPYPYYAKPA	76353312
sp|P02668|CASK_BOVIN"	PEVIESPPEINTVQVTST	970.4966++	2	970.497	PEVIESPPEINTVQVTST	485933696
sp|P02668|CASK_BOVIN"	MAIPPKKNQD	579.3028++ 386.5376+++	2 3	579.302798 386.537624	M[+16]AIPPKKNQD	387201248
sp|P02668|CASK_BOVIN"	KTEIPTINTIASGEPTSTPTTEAVESTVATLEDSPEV	1299.2872+++ 1299.2872+++	3 3	1299.287232 1299.287232	KTEIPTINTIASGEPTSTPTTEAVESTVATLEDS[+80]PEV KTEIPTINTIASGEPTST[+80]PTTEAVESTVATLEDSPEV	143029376
sp|P02668|CASK_BOVIN"	KTEIPTINTIASGE	737.3934++	2	737.393	KTEIPTINTIASGE	247258512
sp|P02668|CASK_BOVIN"	FMAIPPKKNQDKTEIPTINTIASGEPTSTPTTEAVESTVATLED	1173.0889++++	4	1173.09	FM[+16]AIPPKKNQDKTEIPTINTIASGEPTSTPTTEAVESTVATLED	1505852800
sp|P02668|CASK_BOVIN"	MAIPPKKNQ	513.7919++	2	513.792	MAIPPKKNQ	12046330
sp|P02668|CASK_BOVIN"	TEIPTINTIASGEPTSTPTTEAVESTVATLED	1092.5349+++	3	1092.53	TEIPTINTIASGEPTSTPTTEAVESTVATLED	8073066
sp|P02668|CASK_BOVIN"	PTSTPTTEAVESTVATLE	917.4518++	2	917.452	PTSTPTTEAVESTVATLE	129761184
sp|P02668|CASK_BOVIN"	PPEINTVQVTST	643.3353++	2	643.335	PPEINTVQVTST	144552496
sp|P02668|CASK_BOVIN"	SPAQILQWQVL	641.8613++	2	641.861	SPAQILQWQVL	5941098
sp|P02668|CASK_BOVIN"	AIPPKKNQD	505.7851++	2	505.785	AIPPKKNQD	13984208
sp|P02668|CASK_BOVIN"	SPEVIESPPEINTVQVTSTA	1049.5311++	2	1049.53	SPEVIESPPEINTVQVTSTA	38660444
sp|P02668|CASK_BOVIN"	MAIPPKKNQDKTE	750.3980++ 500.6011+++ 375.7026++++	2 3 4	750.397958 500.601064 375.702617	MAIPPKKNQDKTE	309389084
sp|P02702|FOLR1_BOVIN"	PFQGNPNEEVARFYAENPTSGSTPQGI	1454.1808++ 969.7896+++ 727.5941++++	2 3 4	1454.180834 969.789648 727.594055	PFQGNPNEEVARFYAENPTSGSTPQGI	36852671488
sp|P02702|FOLR1_BOVIN"	PFQGNPNEEVARF	752.8626++	2	752.863	PFQGNPNEEVARF	517341536
sp|P02702|FOLR1_BOVIN"	PFQGNPNEEVARFYAENPTSG	1162.5325++ 775.3575+++	2 3	1162.532546 775.357456	PFQGNPNEEVARFYAENPTSG	173326832
sp|P02702|FOLR1_BOVIN"	PFQGNPNEEVARFYAE	934.4341++	2	934.434	PFQGNPNEEVARFYAE	85818664
sp|P02702|FOLR1_BOVIN"	PNEEVARFYAENPTSGSTPQGI	1182.5588++ 788.7083+++	2 3	1182.55876 788.708266	PNEEVARFYAENPTSGSTPQGI	183414656
sp|P02702|FOLR1_BOVIN"	YAENPTSGSTPQGI	711.3308++	2	711.331	YAENPTSGSTPQGI	145302192
sp|P02702|FOLR1_BOVIN"	PFQGNPNEEVARFY	834.3943++	2	834.394	PFQGNPNEEVARFY	70441960
sp|P02702|FOLR1_BOVIN"	PFQGNPNEEVARFYAEN	991.4556++	2	991.456	PFQGNPNEEVARFYAEN	48410088
sp|P02702|FOLR1_BOVIN"	AKHHKAEPGPEDSLHE	594.6237+++	3	594.624	AKHHKAEPGPEDSLHE	7497848
sp|P02754|LACB_BOVIN"	ALNENKVLVLD	614.3508++	2	614.351	ALNENKVLVLD	295426818048
sp|P02754|LACB_BOVIN"	AQSAPLRVYVEELKPT	900.9964++	2	900.996	AQSAPLRVYVEELKPT	639475008
sp|P02754|LACB_BOVIN"	ALNENKVLVL	556.8373++	2	556.837	ALNENKVLVL	11754537984
sp|P02754|LACB_BOVIN"	AQSAPLRVYVEELKPTPEGD	1100.0682++ 733.7146+++	2 3	1100.068233 733.71458	AQSAPLRVYVEELKPTPEGD	360682553344
sp|P02754|LACB_BOVIN"	ISLLDAQSAPLRVYVEELKPTPE	856.8022+++	3	856.802	ISLLDAQSAPLRVYVEELKPTPE	423993888
sp|P02754|LACB_BOVIN"	EALEKFDKALKAL	492.6205+++	3	492.62	EALEKFDKALKAL	858828096
sp|P02754|LACB_BOVIN"	DEALEKFD	483.7244++	2	483.724	DEALEKFD	177985175552
sp|P02754|LACB_BOVIN"	PTQLEEQCHI	599.2821++	2	599.282	PTQLEEQCHI	46821269504
sp|P02754|LACB_BOVIN"	IQKVAGTWYSLAMAAS	848.9400++	2	848.94	IQKVAGTWYSLAMAAS	2823046656
sp|P02754|LACB_BOVIN"	AQSAPLRVYVEELKPTPEG	1042.5548++ 695.3723+++	2 3	1042.554761 695.372266	AQSAPLRVYVEELKPTPEG	27166671872
sp|P02754|LACB_BOVIN"	IQKVAGTWYSLAMAASD	906.4535++ 604.6381+++	2 3	906.453461 604.638066	IQKVAGTWYSLAMAASD	48282696000
sp|P02754|LACB_BOVIN"	IQKVAGTWYSLA	668.8666++	2	668.867	IQKVAGTWYSLA	714563072
sp|P02754|LACB_BOVIN"	KTKIPAVFKID	630.3897++ 420.5956+++	2 3	630.389731 420.595579	KTKIPAVFKID	18613597184
sp|P02754|LACB_BOVIN"	NPTQLEEQCHI	656.3035++	2	656.304	NPTQLEEQCHI	4118247936
sp|P02754|LACB_BOVIN"	TPEVDDEALEK	623.2959++	2	623.296	TPEVDDEALEK	2766040576
sp|P02754|LACB_BOVIN"	ALNENKVLVLDTDYK	867.9673++ 578.9806+++	2 3	867.967259 578.980598	ALNENKVLVLDTDYK	1825803648
sp|P02754|LACB_BOVIN"	AQKKIIAEKTKIPAVFKID	714.4401+++ 536.0819++++	3 4	714.440063 536.081866	AQKKIIAEKTKIPAVFKID	3387220032
sp|P02754|LACB_BOVIN"	DEALEKF	426.2109++	2	426.211	DEALEKF	4232480512
sp|P02754|LACB_BOVIN"	ALNENKVLVLDTD	722.3881++	2	722.388	ALNENKVLVLDTD	76371984384
sp|P02754|LACB_BOVIN"	DIQKVAGTWYSLAMAASD	963.9669++	2	963.967	DIQKVAGTWYSLAMAASD	169949632
sp|P02754|LACB_BOVIN"	ISLLDAQSAPLRVYVEELKPTPEG	875.8093+++	3	875.809	ISLLDAQSAPLRVYVEELKPTPEG	916092288
sp|P02754|LACB_BOVIN"	LNENKVLVLDTD	686.8696++	2	686.87	LNENKVLVLDTD	469052800
sp|P02754|LACB_BOVIN"	YVEELKPTPE	602.8084++	2	602.808	YVEELKPTPE	2202100224
sp|P02754|LACB_BOVIN"	LIVTQTMKGLDIQKVAGTWYS	784.7592+++	3	784.759	LIVTQTMKGLDIQKVAGTWYS	180176544
sp|P02754|LACB_BOVIN"	NENKVLVLD	522.2902++	2	522.29	NENKVLVLD	2375337984
sp|P02754|LACB_BOVIN"	SFNPTQLEEQCHI	773.3537++	2	773.354	SFNPTQLEEQCHI	1644440320
sp|P02754|LACB_BOVIN"	NENKVLVLDTD	630.3275++	2	630.328	NENKVLVLDTD	1636735872
sp|P02754|LACB_BOVIN"	KKIIAEKTKIPAVFKID	648.0748+++ 486.3079++++	3 4	648.074833 486.307944	KKIIAEKTKIPAVFKID	2235443936
sp|P02754|LACB_BOVIN"	VEELKPTPE	521.2768++	2	521.277	VEELKPTPE	916283968
sp|P02754|LACB_BOVIN"	ALNENKVLVLDT	664.8746++	2	664.875	ALNENKVLVLDT	2129610752
sp|P02754|LACB_BOVIN"	VYVEELKPTPEGD	738.3668++	2	738.367	VYVEELKPTPEGD	861714880
sp|P02754|LACB_BOVIN"	NKVLVLDTD	508.7848++	2	508.785	NKVLVLDTD	4337893888
sp|P02754|LACB_BOVIN"	AQSAPLRVYVEELKPTPE	1014.0440++ 676.3651+++	2 3	1014.044029 676.365111	AQSAPLRVYVEELKPTPE	15853766400
sp|P02754|LACB_BOVIN"	PAVFKID	395.2289++	2	395.229	PAVFKID	2356075008
sp|P02754|LACB_BOVIN"	ISLLDAQSAPLRVYVEELKPTPEGD	1370.7238++ 914.1516+++ 685.8655++++	2 3 4	1370.723814 914.151635 685.865545	ISLLDAQSAPLRVYVEELKPTPEGD	13457561728
sp|P02754|LACB_BOVIN"	YVEELKPTPEGDLE	809.8960++	2	809.896	YVEELKPTPEGDLE	370043360
sp|P02754|LACB_BOVIN"	IQKVAGTWYSLAMAASD	914.4509++	2	914.451	IQKVAGTWYSLAM[+16]AASD	9786724352
sp|P02754|LACB_BOVIN"	EKTKIPAVFKID	463.6098+++	3	463.61	EKTKIPAVFKID	3121699840
sp|P02754|LACB_BOVIN"	IPAVFKID	451.7709++	2	451.771	IPAVFKID	3819930624
sp|P02754|LACB_BOVIN"	FNPTQLEEQCHI	729.8377++	2	729.838	FNPTQLEEQCHI	733587776
sp|P02754|LACB_BOVIN"	LNENKVLVLD	578.8322++	2	578.832	LNENKVLVLD	861818752
sp|P02754|LACB_BOVIN"	DEALEKFDKA	583.2904++	2	583.29	DEALEKFDKA	2247559936
sp|P02754|LACB_BOVIN"	YVEELKPTPEGDL	745.3747++	2	745.375	YVEELKPTPEGDL	1054917184
sp|P02754|LACB_BOVIN"	LVRTPEVDD	522.2720++	2	522.272	LVRTPEVDD	590381440
sp|P02754|LACB_BOVIN"	QKKIIAEKTKIPAVFKID	518.3226++++	4	518.323	QKKIIAEKTKIPAVFKID	410420704
sp|P02754|LACB_BOVIN"	ISLLDAQSAPLRVYVEELK	715.4036+++	3	715.404	ISLLDAQSAPLRVYVEELK	103431904
sp|P02754|LACB_BOVIN"	VEELKPTPEGDL	663.8430++	2	663.843	VEELKPTPEGDL	2179421440
sp|P02754|LACB_BOVIN"	IQKVAGTWYSLAM	734.3869++	2	734.387	IQKVAGTWYSLAM	176656816
sp|P02754|LACB_BOVIN"	KTKIPAVF	452.2867++	2	452.287	KTKIPAVF	1493948160
sp|P02754|LACB_BOVIN"	TPEVDDEALEKFDKALK	487.7532++++	4	487.753	TPEVDDEALEKFDKALK	34560640
sp|P02754|LACB_BOVIN"	IQKVAGTWYSLAMAA	805.4240++	2	805.424	IQKVAGTWYSLAMAA	592192064
sp|P02754|LACB_BOVIN"	VEELKPTPEGDLE	728.3643++	2	728.364	VEELKPTPEGDLE	1026440192
sp|P02754|LACB_BOVIN"	DEALEKFDKAL	639.8324++	2	639.832	DEALEKFDKAL	33394978
sp|P02754|LACB_BOVIN"	EALEKFD	426.2109++	2	426.211	EALEKFD	2567372544
sp|P02754|LACB_BOVIN"	EKFDKALKA	525.3031++	2	525.303	EKFDKALKA	37398904
sp|P02754|LACB_BOVIN"	LVRTPEVDDEALEKFD	625.9827+++	3	625.983	LVRTPEVDDEALEKFD	236543280
sp|P02754|LACB_BOVIN"	QALIVTQTMKGLD	709.3896++	2	709.39	QALIVTQTMKGLD	133337040
sp|P02754|LACB_BOVIN"	KALKALPMHIRL	469.6270+++ 352.4721++++	3 4	469.626996 352.472066	KALKALPM[+16]HIRL	705628256
sp|P02754|LACB_BOVIN"	KIDALNENKVLVL	490.2960+++	3	490.296	KIDALNENKVLVL	127944432
sp|P02754|LACB_BOVIN"	LIVTQTMKGLDIQKVAGTWYSL	827.7856+++	3	827.786	LIVTQTM[+16]KGLDIQKVAGTWYSL	75008248
sp|P02754|LACB_BOVIN"	DEALEKFDKALK	703.8799++ 469.5890+++ 352.4436++++	2 3 4	703.879924 469.589041 352.4436	DEALEKFDKALK	3409668448
sp|P02754|LACB_BOVIN"	IAEKTKIPAVFKID	524.9835+++ 393.9894++++	3 4	524.983503 393.989446	IAEKTKIPAVFKID	2299164320
sp|P02754|LACB_BOVIN"	VEELKPTPEGDLEIL	841.4484++	2	841.448	VEELKPTPEGDLEIL	221145872
sp|P02754|LACB_BOVIN"	ALNENKVLVLDTDY	803.9198++	2	803.92	ALNENKVLVLDTDY	440102944
sp|P02754|LACB_BOVIN"	ISLLDAQSAPLRVYVEELKPT	781.4370+++	3	781.437	ISLLDAQSAPLRVYVEELKPT	30196124
sp|P02754|LACB_BOVIN"	VDDEALEKF	533.2586++	2	533.259	VDDEALEKF	276232160
sp|P02754|LACB_BOVIN"	IQKVAGTWYSLAMA	769.9054++	2	769.905	IQKVAGTWYSLAMA	256555200
sp|P02754|LACB_BOVIN"	KIDALNENKVLVLDTD	900.4911++ 600.6632+++	2 3	900.491098 600.663157	KIDALNENKVLVLDTD	515805408
sp|P02754|LACB_BOVIN"	KIPAVFKID	515.8184++	2	515.818	KIPAVFKID	791327232
sp|P02754|LACB_BOVIN"	AQSAPLRVYVEELK	801.9461++ 534.9665+++	2 3	801.94613 534.966512	AQSAPLRVYVEELK	1905410496
sp|P02754|LACB_BOVIN"	IQKVAGTWYSLAMAAS	856.9374++	2	856.937	IQKVAGTWYSLAM[+16]AAS	494049664
sp|P02754|LACB_BOVIN"	DAQSAPLRVYVEELKPTPEGD	1157.5817++ 772.0569+++	2 3	1157.581704 772.056895	DAQSAPLRVYVEELKPTPEGD	693934336
sp|P02754|LACB_BOVIN"	LIVTQTMKGLDIQKVAGTWYSLAMAASD	1015.1875+++ 761.6424++++	3 4	1015.187475 761.642425	LIVTQTM[+16]KGLDIQKVAGTWYSLAM[+16]AASD	636155064
sp|P02754|LACB_BOVIN"	IQKVAGTWYSLAMAASDIS	1006.5115++	2	1006.51	IQKVAGTWYSLAMAASDIS	56477860
sp|P02754|LACB_BOVIN"	APLRVYVEELKPTPEGD	638.3387+++	3	638.339	APLRVYVEELKPTPEGD	347110976
sp|P02754|LACB_BOVIN"	EALEKFDKA	525.7769++ 350.8537+++	2 3	525.776939 350.853718	EALEKFDKA	779981152
sp|P02754|LACB_BOVIN"	DALNENKVLVLD	671.8643++	2	671.864	DALNENKVLVLD	185272544
sp|P02754|LACB_BOVIN"	AEKTKIPAVFKID	730.4296++ 487.2888+++ 365.7184++++	2 3 4	730.429584 487.288815 365.71843	AEKTKIPAVFKID	4691128128
sp|P02754|LACB_BOVIN"	TKIPAVFKID	566.3422++ 377.8973+++	2 3	566.342249 377.897258	TKIPAVFKID	1311283136
sp|P02754|LACB_BOVIN"	EALEKFDKAL	582.3190++ 388.5484+++	2 3	582.318971 388.548406	EALEKFDKAL	1355803968
sp|P02754|LACB_BOVIN"	PEVDDEALEKFD	703.8197++	2	703.82	PEVDDEALEKFD	680030464
sp|P02754|LACB_BOVIN"	LIVTQTMKGLDIQKVAGTWYSLA	846.1330+++	3	846.133	LIVTQTMKGLDIQKVAGTWYSLA	33417984
sp|P02754|LACB_BOVIN"	KVLVLDTD	451.7633++	2	451.763	KVLVLDTD	1179804032
sp|P02754|LACB_BOVIN"	DTDYKKYLL	579.8057++	2	579.806	DTDYKKYLL	255091136
sp|P02754|LACB_BOVIN"	AQSAPLRVYVEEL	737.8986++	2	737.899	AQSAPLRVYVEEL	140178448
sp|P02754|LACB_BOVIN"	EALEKFDKALKA	681.8850++ 454.9258+++	2 3	681.885009 454.925765	EALEKFDKALKA	1850974496
sp|P02754|LACB_BOVIN"	DEALEKFDKALKALPMH	652.6802+++	3	652.68	DEALEKFDKALKALPMH	29494094
sp|P02754|LACB_BOVIN"	ISLLDAQSAPLRVYVEE	952.0122++	2	952.012	ISLLDAQSAPLRVYVEE	252063360
sp|P02754|LACB_BOVIN"	KALKALPMHIR	431.9323+++	3	431.932	KALKALPM[+16]HIR	64482176
sp|P02754|LACB_BOVIN"	KALKALPMHIR	426.6007+++	3	426.601	KALKALPMHIR	285207232
sp|P02754|LACB_BOVIN"	KALKALPMHIRL	695.9394++ 464.2954+++	2 3	695.939399 464.295358	KALKALPMHIRL	1090129584
sp|P02754|LACB_BOVIN"	YVEELKPTPEGD	688.8326++	2	688.833	YVEELKPTPEGD	562872704
sp|P02754|LACB_BOVIN"	KALKALPMHIRLS	493.3060+++ 370.2313++++	3 4	493.306034 370.231345	KALKALPMHIRLS	1179006080
sp|P02754|LACB_BOVIN"	TDYKKYLLF	595.8264++	2	595.826	TDYKKYLLF	246773024
sp|P02754|LACB_BOVIN"	ALNENKVLVLDTDYKK	932.0147++ 621.6789+++ 466.5110++++	2 3 4	932.01474 621.678919 466.511008	ALNENKVLVLDTDYKK	3130744608
sp|P02754|LACB_BOVIN"	IVTQTMKGLDIQKVAGTWYSL	784.7592+++	3	784.759	IVTQTMKGLDIQKVAGTWYSL	33088720
sp|P02754|LACB_BOVIN"	RLSFNPTQLEEQCHI	605.6333+++	3	605.633	RLSFNPTQLEEQCHI	41823632
sp|P02754|LACB_BOVIN"	RVYVEELKPTPEG	758.9039++	2	758.904	RVYVEELKPTPEG	57023640
sp|P02754|LACB_BOVIN"	EALEKFDKALKALPMH	614.3378+++ 461.0052++++	3 4	614.33784 461.005199	EALEKFDKALKALPMH	189133192
sp|P02754|LACB_BOVIN"	KIIAEKTKIPAVFKID	605.3765+++ 454.2842++++	3 4	605.376512 454.284203	KIIAEKTKIPAVFKID	1712736384
sp|P02754|LACB_BOVIN"	KALKALPMHIRLSFNPTQLEEQCHI	734.1427++++	4	734.143	KALKALPM[+16]HIRLSFNPTQLEEQCHI	246487648
sp|P02754|LACB_BOVIN"	VYVEELKPTPE	652.3426++	2	652.343	VYVEELKPTPE	355639072
sp|P02754|LACB_BOVIN"	TQLEEQCHI	550.7557++	2	550.756	TQLEEQCHI	1189300480
sp|P02754|LACB_BOVIN"	LIVTQTMKGLDIQKVAGTWYSLA	851.4646+++	3	851.465	LIVTQTM[+16]KGLDIQKVAGTWYSLA	89126432
sp|P02754|LACB_BOVIN"	ELKPTPEGDLE	614.3088++	2	614.309	ELKPTPEGDLE	293803616
sp|P02754|LACB_BOVIN"	ELKPTPEGDL	549.7875++	2	549.788	ELKPTPEGDL	1266306944
sp|P02754|LACB_BOVIN"	VRTPEVDDEAL	622.3119++	2	622.312	VRTPEVDDEAL	393606304
sp|P02754|LACB_BOVIN"	SAPLRVYVEELKPTPEGD	1000.5204++ 667.3493+++	2 3	1000.520387 667.34935	SAPLRVYVEELKPTPEGD	1155227872
sp|P02754|LACB_BOVIN"	ALIVTQTMKGLD	645.3603++	2	645.36	ALIVTQTMKGLD	223969072
sp|P02754|LACB_BOVIN"	VEELKPTPEGDLEI	784.9063++	2	784.906	VEELKPTPEGDLEI	134716544
sp|P02754|LACB_BOVIN"	IRLSFNPTQLEEQCHI	643.3280+++	3	643.328	IRLSFNPTQLEEQCHI	26709764
sp|P02754|LACB_BOVIN"	IQKVAGTWYSL	633.3481++	2	633.348	IQKVAGTWYSL	766876928
sp|P02754|LACB_BOVIN"	SAPLRVYVEEL	638.3508++	2	638.351	SAPLRVYVEEL	181142528
sp|P02754|LACB_BOVIN"	AMAASDISLLDAQSAPLRVYVEELKPTPEGD	822.4182++++	4	822.418	AMAASDISLLDAQSAPLRVYVEELKPTPEGD	23506868
sp|P02754|LACB_BOVIN"	LPMHIRL	440.2653++	2	440.265	LPMHIRL	346757632
sp|P02754|LACB_BOVIN"	ALEKFDKALKA	411.9116+++	3	411.912	ALEKFDKALKA	306704416
sp|P02754|LACB_BOVIN"	DEALEKFDKALKA	739.3985++ 493.2681+++ 370.2029++++	2 3 4	739.398481 493.268079 370.202878	DEALEKFDKALKA	1980859840
sp|P02754|LACB_BOVIN"	KTKIPAVFKI	382.2533+++	3	382.253	KTKIPAVFKI	195786752
sp|P02754|LACB_BOVIN"	KALKALPM	436.2753++	2	436.275	KALKALPM	885318656
sp|P02754|LACB_BOVIN"	DEALEKFDKALKALP	563.3137+++	3	563.314	DEALEKFDKALKALP	90734752
sp|P02754|LACB_BOVIN"	DIQKVAGTWYSL	690.8615++	2	690.862	DIQKVAGTWYSL	267835840
sp|P02754|LACB_BOVIN"	IDALNENKVLVLDTD	836.4436++	2	836.444	IDALNENKVLVLDTD	166305424
sp|P02754|LACB_BOVIN"	VRTPEVDDEA	565.7698++	2	565.77	VRTPEVDDEA	381164288
sp|P02754|LACB_BOVIN"	IIAEKTKIPAVFKID	843.5136++ 562.6782+++ 422.2605++++	2 3 4	843.513648 562.678191 422.260462	IIAEKTKIPAVFKID	2348264640
sp|P02754|LACB_BOVIN"	TPEVDDEALEKFD	754.3436++	2	754.344	TPEVDDEALEKFD	1487482368
sp|P02754|LACB_BOVIN"	TPEVDDEALEKFDKALKAL	711.3756+++	3	711.376	TPEVDDEALEKFDKALKAL	10359041
sp|P02754|LACB_BOVIN"	AQSAPLRVYVEE	681.3566++	2	681.357	AQSAPLRVYVEE	12479551488
sp|P02754|LACB_BOVIN"	AQSAPLRVYVEELKPTPEGDLE	1221.1316++ 814.4235+++	2 3	1221.131561 814.423466	AQSAPLRVYVEELKPTPEGDLE	986963220
sp|P02754|LACB_BOVIN"	KALKALPMHI	374.5670+++	3	374.567	KALKALPMHI	111489048
sp|P02754|LACB_BOVIN"	DALNENKVLVLDTD	779.9016++	2	779.902	DALNENKVLVLDTD	56818588
sp|P02754|LACB_BOVIN"	AQSAPLRVYVEELKPTPEGDL	771.4093+++	3	771.409	AQSAPLRVYVEELKPTPEGDL	100041272
sp|P02754|LACB_BOVIN"	DEALEKFDK	547.7719++	2	547.772	DEALEKFDK	185388960
sp|P02754|LACB_BOVIN"	MAASDISLLDAQSAPLRVYVEELKPTPEGD	1077.8745+++	3	1077.87	M[+16]AASDISLLDAQSAPLRVYVEELKPTPEGD	218665024
sp|P02754|LACB_BOVIN"	EALEKFDKALK	646.3665++	2	646.366	EALEKFDKALK	251749904
sp|P02754|LACB_BOVIN"	SLLDAQSAPLRVYVEELKPTPEGD	903.1124+++	3	903.112	S[+80]LLDAQSAPLRVYVEELKPTPEGD	560606976
sp|P02754|LACB_BOVIN"	KALKALPMHIRLS	374.2301++++	4	374.23	KALKALPM[+16]HIRLS	108807720
sp|P02754|LACB_BOVIN"	KVAGTWYSLAMAASD	785.8821++	2	785.882	KVAGTWYSLAMAASD	63466864
sp|P02754|LACB_BOVIN"	QALIVTQTMKGLDIQKVA	653.0432+++	3	653.043	QALIVTQTMKGLDIQKVA	317095488
sp|P02754|LACB_BOVIN"	DDEALEKFD	541.2378++	2	541.238	DDEALEKFD	1289265152
sp|P02754|LACB_BOVIN"	PMHIRL	383.7233++	2	383.723	PMHIRL	163535360
sp|P02754|LACB_BOVIN"	TPEVDDEALE	559.2484++	2	559.248	TPEVDDEALE	138515680
sp|P02754|LACB_BOVIN"	LTCGAQALIVTQTMKGLD	971.9725++	2	971.973	LT[+80]CGAQALIVTQTMKGLD	27623198
sp|P02754|LACB_BOVIN"	VEELKPTPEGDLEILLQK	684.3805+++	3	684.381	VEELKPTPEGDLEILLQK	17399798
sp|P02754|LACB_BOVIN"	LIVTQTMKGLDIQKVAGTWYSL	822.4539+++	3	822.454	LIVTQTMKGLDIQKVAGTWYSL	197390880
sp|P02754|LACB_BOVIN"	PEQSLACQCLVRTPEVDDEALEKFD	945.7774+++	3	945.777	PEQSLACQCLVRTPEVDDEALEKFD	383693856
sp|P02754|LACB_BOVIN"	RVYVEELKPTPEGD	544.6140+++	3	544.614	RVYVEELKPTPEGD	1914199040
sp|P02754|LACB_BOVIN" tr|Q9BDG3|Q9BDG3_BOVIN"	LEILLQK	428.7788++	2	428.779	LEILLQK	830537920
sp|P02754|LACB_BOVIN" tr|Q9BDG3|Q9BDG3_BOVIN"	LEILLQKWENGE	736.3932++	2	736.393	LEILLQKWENGE	503406240
sp|P02754|LACB_BOVIN" tr|Q9BDG3|Q9BDG3_BOVIN"	LKPTPEGDL	485.2662++	2	485.266	LKPTPEGDL	1172092416
sp|P02754|LACB_BOVIN" tr|Q9BDG3|Q9BDG3_BOVIN"	LEILLQKWEN	643.3612++	2	643.361	LEILLQKWEN	258130608
sp|P02754|LACB_BOVIN" tr|Q9BDG3|Q9BDG3_BOVIN"	ISLLDAQSAPLRVY	773.4354++	2	773.435	ISLLDAQSAPLRVY	158950784
sp|P02754|LACB_BOVIN" tr|Q9BDG3|Q9BDG3_BOVIN"	LDAQSAPLRV	535.3037++	2	535.304	LDAQSAPLRV	3725551104
sp|P02754|LACB_BOVIN" tr|Q9BDG3|Q9BDG3_BOVIN"	AMAASDISLLD	553.7735++	2	553.774	AMAASDISLLD	7122484224
sp|P02754|LACB_BOVIN" tr|Q9BDG3|Q9BDG3_BOVIN"	AQSAPLRVYVE	616.8353++	2	616.835	AQSAPLRVYVE	9100331008
sp|P02754|LACB_BOVIN" tr|Q9BDG3|Q9BDG3_BOVIN"	ISLLDAQSAPLR	642.3695++	2	642.37	ISLLDAQSAPLR	458976128
sp|P02754|LACB_BOVIN" tr|Q9BDG3|Q9BDG3_BOVIN"	LEILLQKWE	586.3397++	2	586.34	LEILLQKWE	177902880
sp|P02754|LACB_BOVIN" tr|Q9BDG3|Q9BDG3_BOVIN"	ISLLDAQSAPLRVYVE	887.4909++	2	887.491	ISLLDAQSAPLRVYVE	242498784
sp|P02754|LACB_BOVIN" tr|Q9BDG3|Q9BDG3_BOVIN"	ISLLDAQSAPLRV	691.9037++	2	691.904	ISLLDAQSAPLRV	131696000
sp|P02754|LACB_BOVIN" tr|Q9BDG3|Q9BDG3_BOVIN"	SLAMAASDISLLD	661.8290++	2	661.829	SLAM[+16]AASDISLLD	284524352
sp|P02754|LACB_BOVIN" tr|Q9BDG3|Q9BDG3_BOVIN"	SLAMAASDISLLD	653.8316++	2	653.832	SLAMAASDISLLD	469881312
sp|P02754|LACB_BOVIN" tr|Q9BDG3|Q9BDG3_BOVIN"	YSLAMAASDISLLD	743.3607++	2	743.361	YSLAM[+16]AASDISLLD	7145202
sp|P02754|LACB_BOVIN" tr|Q9BDG3|Q9BDG3_BOVIN"	AMAASDISLLD	561.7710++	2	561.771	AM[+16]AASDISLLD	463972256
sp|P02754|LACB_BOVIN" tr|Q9BDG3|Q9BDG3_BOVIN"	SAPLRVYVE	517.2875++	2	517.287	SAPLRVYVE	466733344
sp|P02754|LACB_BOVIN" tr|Q9BDG3|Q9BDG3_BOVIN"	MAASDISLLD	518.2550++	2	518.255	MAASDISLLD	1197327232
sp|P02754|LACB_BOVIN" tr|Q9BDG3|Q9BDG3_BOVIN"	AASDISLLD	452.7347++	2	452.735	AASDISLLD	152896512
sp|P02754|LACB_BOVIN" tr|Q9BDG3|Q9BDG3_BOVIN"	AMAASDISLL	496.2601++	2	496.26	AMAASDISLL	395909600
sp|P02754|LACB_BOVIN" tr|Q9BDG3|Q9BDG3_BOVIN"	LEILLQKWENGEC	787.8978++	2	787.898	LEILLQKWENGEC	17620390
sp|P02754|LACB_BOVIN" tr|Q9BDG3|Q9BDG3_BOVIN"	LEILLQKWENG	671.8719++	2	671.872	LEILLQKWENG	121873232
sp|P02754|LACB_BOVIN" tr|Q9BDG3|Q9BDG3_BOVIN"	YSLAMAASDISLLD	735.3632++	2	735.363	YSLAMAASDISLLD	5809251
sp|P02754|LACB_BOVIN" tr|Q9TRB9|Q9TRB9_BOVIN"	LIVTQTMKGLD	609.8418++ 406.8969+++	2 3	609.841756 406.896929	LIVTQTMKGLD	677218615296
sp|P02754|LACB_BOVIN" tr|Q9TRB9|Q9TRB9_BOVIN"	LIVTQTMKGLDIQKVAG	908.0241++ 605.6851+++	2 3	908.024054 605.685128	LIVTQTMKGLDIQKVAG	117831041024
sp|P02754|LACB_BOVIN" tr|Q9TRB9|Q9TRB9_BOVIN"	LIVTQTMKGLDIQKVAGT	958.5479++ 639.3677+++	2 3	958.547893 639.367687	LIVTQTMKGLDIQKVAGT	11284979200
sp|P02754|LACB_BOVIN" tr|Q9TRB9|Q9TRB9_BOVIN"	LIVTQTMKGL	552.3283++	2	552.328	LIVTQTMKGL	231304888320
sp|P02754|LACB_BOVIN" tr|Q9TRB9|Q9TRB9_BOVIN"	LIVTQTMKGLDIQKVAGTW	1051.5875++ 701.3941+++	2 3	1051.58755 701.394125	LIVTQTMKGLDIQKVAGTW	873076944
sp|P02754|LACB_BOVIN" tr|Q9TRB9|Q9TRB9_BOVIN"	LIVTQTMKGLDIQK	794.4606++ 529.9761+++	2 3	794.460558 529.976131	LIVTQTMKGLDIQK	11830798848
sp|P02754|LACB_BOVIN" tr|Q9TRB9|Q9TRB9_BOVIN"	LIVTQTMKGLDIQ	730.4131++	2	730.413	LIVTQTMKGLDIQ	23384266752
sp|P02754|LACB_BOVIN" tr|Q9TRB9|Q9TRB9_BOVIN"	LIVTQTMKGLDIQKVA	879.5133++ 586.6780+++	2 3	879.513322 586.677973	LIVTQTMKGLDIQKVA	59389489152
sp|P02754|LACB_BOVIN" tr|Q9TRB9|Q9TRB9_BOVIN"	LIVTQTMKGLDIQKVAGTW	1059.5850++ 706.7258+++	2 3	1059.585007 706.725763	LIVTQTM[+16]KGLDIQKVAGTW	530066264
sp|P02754|LACB_BOVIN" tr|Q9TRB9|Q9TRB9_BOVIN"	LIVTQTMKGL	560.3257++	2	560.326	LIVTQTM[+16]KGL	145281843200
sp|P02754|LACB_BOVIN" tr|Q9TRB9|Q9TRB9_BOVIN"	LIVTQTMKG	495.7863++	2	495.786	LIVTQTMKG	350376230912
sp|P02754|LACB_BOVIN" tr|Q9TRB9|Q9TRB9_BOVIN"	IVTQTMKGLD	553.2997++	2	553.3	IVTQTMKGLD	111255609344
sp|P02754|LACB_BOVIN" tr|Q9TRB9|Q9TRB9_BOVIN"	LIVTQTMKGLDIQKVA	887.5108++ 592.0096+++	2 3	887.51078 592.009612	LIVTQTM[+16]KGLDIQKVA	9299170048
sp|P02754|LACB_BOVIN" tr|Q9TRB9|Q9TRB9_BOVIN"	LIVTQTMKGLDIQKVAG	611.0168+++	3	611.017	LIVTQTM[+16]KGLDIQKVAG	14146156544
sp|P02754|LACB_BOVIN" tr|Q9TRB9|Q9TRB9_BOVIN"	LIVTQTMKG	503.7837++	2	503.784	LIVTQTM[+16]KG	4504616960
sp|P02754|LACB_BOVIN" tr|Q9TRB9|Q9TRB9_BOVIN"	LIVTQTMKGLDIQKV	843.9948++ 562.9989+++	2 3	843.994765 562.998935	LIVTQTMKGLDIQKV	3023275520
sp|P02754|LACB_BOVIN" tr|Q9TRB9|Q9TRB9_BOVIN"	LIVTQTMKGLDI	666.3838++	2	666.384	LIVTQTMKGLDI	1324048384
sp|P02754|LACB_BOVIN" tr|Q9TRB9|Q9TRB9_BOVIN"	LIVTQTMK	467.2755++	2	467.276	LIVTQTMK	98920980480
sp|P02754|LACB_BOVIN" tr|Q9TRB9|Q9TRB9_BOVIN"	IVTQTMKGLD	561.2972++	2	561.297	IVTQTM[+16]KGLD	616436672
sp|P02754|LACB_BOVIN" tr|Q9TRB9|Q9TRB9_BOVIN"	LIVTQTMK	475.2730++	2	475.273	LIVTQTM[+16]K	1685453440
sp|P02754|LACB_BOVIN" tr|Q9TRB9|Q9TRB9_BOVIN"	LIVTQTMKGLDIQKVAGT	644.6993+++	3	644.699	LIVTQTM[+16]KGLDIQKVAGT	732876608
sp|P02754|LACB_BOVIN" tr|Q9TRB9|Q9TRB9_BOVIN"	IQKVAGTWY	533.2900++	2	533.29	IQKVAGTWY	962879104
sp|P02754|LACB_BOVIN" tr|Q9TRB9|Q9TRB9_BOVIN"	LIVTQTMKGLD	617.8392++ 412.2286+++	2 3	617.839213 412.228568	LIVTQTM[+16]KGLD	2139965423808
sp|P02754|LACB_BOVIN" tr|Q9TRB9|Q9TRB9_BOVIN"	IVTQTMKGL	495.7863++	2	495.786	IVTQTMKGL	6703233024
sp|P02754|LACB_BOVIN" tr|Q9TRB9|Q9TRB9_BOVIN"	LIVTQTMKGLDIQKV	851.9922++	2	851.992	LIVTQTM[+16]KGLDIQKV	177873024
sp|P02754|LACB_BOVIN" tr|Q9TRB9|Q9TRB9_BOVIN"	LIVTQTMKGLDIQ	738.4105++	2	738.411	LIVTQTM[+16]KGLDIQ	280941504
sp|P02754|LACB_BOVIN" tr|Q9TRB9|Q9TRB9_BOVIN"	IVTQTMKGLDIQKVAGTW	663.6994+++	3	663.699	IVTQTMKGLDIQKVAGTW	24956640
sp|P02754|LACB_BOVIN" tr|Q9TRB9|Q9TRB9_BOVIN"	IVTQTMKGLDIQKVAG	567.9904+++	3	567.99	IVTQTMKGLDIQKVAG	878632832
sp|P02754|LACB_BOVIN" tr|Q9TRB9|Q9TRB9_BOVIN"	LIVTQTMKGLDIQK	535.3078+++	3	535.308	LIVTQTM[+16]KGLDIQK	627338112
sp|P02754|LACB_BOVIN" tr|Q9TRB9|Q9TRB9_BOVIN"	LDIQKVA	393.7396++	2	393.74	LDIQKVA	77791232
sp|P11151|LIPL_BOVIN"	DRITGGKDFRDIESK	579.6357+++ 434.9786++++	3 4	579.635713 434.978604	DRITGGKDFRDIESK	377568688
sp|P18892|BT1A1_BOVIN"	VSREGQEQEGEEMAEYR	681.6288+++	3	681.629	VSREGQEQEGEEM[+16]AEYR	270868288
sp|P18892|BT1A1_BOVIN"	THRGEEFPSMSESRNPD	659.2903+++	3	659.29	THRGEEFPSMSESRNPD	184826512
sp|P18892|BT1A1_BOVIN"	VSREGQEQEGEEMAEY	935.8916++	2	935.892	VSREGQEQEGEEMAEY	166748640
sp|P18892|BT1A1_BOVIN"	VSREGQEQEGEEMA	789.8387++	2	789.839	VSREGQEQEGEEMA	71984224
sp|P18892|BT1A1_BOVIN"	VSREGQEQEGEEMAEY	943.8891++	2	943.889	VSREGQEQEGEEM[+16]AEY	56701024
sp|P18892|BT1A1_BOVIN"	RATLHAVDVTLD	655.8568++ 437.5736+++	2 3	655.856783 437.573614	RATLHAVDVTLD	299069800
sp|P18892|BT1A1_BOVIN"	PDTAHPHLF	517.7563++	2	517.756	PDTAHPHLF	291153344
sp|P18892|BT1A1_BOVIN"	VSREGQEQEGEEMAEYR	1013.9422++ 676.2972+++	2 3	1013.942175 676.297209	VSREGQEQEGEEMAEYR	1579676704
sp|P18892|BT1A1_BOVIN"	VSREGQEQEGEEMAEYRGR	564.7541++++	4	564.754	VSREGQEQEGEEM[+16]AEYRGR	57593748
sp|P18892|BT1A1_BOVIN"	VSREGQEQEGEEMAE	854.3600++	2	854.36	VSREGQEQEGEEMAE	41469268
sp|P18892|BT1A1_BOVIN"	VSREGQEQEGEEMAEYRGR	747.3381+++	3	747.338	VSREGQEQEGEEMAEYRGR	135329648
sp|P18892|BT1A1_BOVIN"	THRGEEFPSMSESRNPD	664.6219+++	3	664.622	THRGEEFPSM[+16]SESRNPD	25455972
sp|P18892|BT1A1_BOVIN"	KEIPLSPMGEDSASGDIETLHSKLIPLQPSQ	830.1788++++	4	830.179	KEIPLSPMGEDSASGDIETLHSKLIPLQPSQ	35591056
sp|P18892|BT1A1_BOVIN"	EEGLFTVR	475.7507++	2	475.751	EEGLFTVR	272220992
sp|P18892|BT1A1_BOVIN"	THRGEEFPSMSESRNPDEEGLFTVR	727.5886++++	4	727.589	THRGEEFPSMSESRNPDEEGLFTVR	120705232
sp|P18892|BT1A1_BOVIN"	PDTAHPHLFLYEDSKSVR	704.6885+++	3	704.688	PDTAHPHLFLYEDSKSVR	77440368
sp|P18892|BT1A1_BOVIN"	SRQKLPEKPERFD	408.2231++++	4	408.223	SRQKLPEKPERFD	174099904
sp|P18892|BT1A1_BOVIN"	THRGEEFPSMSESRNPDEEGLFTVR	731.5873++++	4	731.587	THRGEEFPSM[+16]SESRNPDEEGLFTVR	21204856
sp|P18892|BT1A1_BOVIN"	LYEDSKSVRLED	485.2438+++	3	485.244	LYEDSKSVRLED	115060872
sp|P18892|BT1A1_BOVIN"	GEEFPSMSESRNPDEEGLFTVR	838.3798+++	3	838.38	GEEFPSMSESRNPDEEGLFTVR	18999166
sp|P24627|TRFL_BOVIN" tr|B9VPZ5|B9VPZ5_BOVIN" tr|C7FE01|C7FE01_BOVIN" tr|Q19KS1|Q19KS1_BOVIN"	GGMVFEAGRD	527.7347++	2	527.735	GGM[+16]VFEAGRD	184983200
sp|P24627|TRFL_BOVIN" tr|B9VPZ5|B9VPZ5_BOVIN" tr|C7FE01|C7FE01_BOVIN" tr|Q19KS1|Q19KS1_BOVIN"	AVTLDGGMVFEAGRD	769.3694++	2	769.369	AVTLDGGMVFEAGRD	123474088
sp|P24627|TRFL_BOVIN" tr|B9VPZ5|B9VPZ5_BOVIN" tr|C7FE01|C7FE01_BOVIN" tr|Q19KS1|Q19KS1_BOVIN" tr|Q6LBN7|Q6LBN7_BOVIN"	GAGDVAFVKETTVFENLPEKAD	779.7251+++	3	779.725	GAGDVAFVKETTVFENLPEKAD	100019400
sp|P24627|TRFL_BOVIN" tr|B9VPZ5|B9VPZ5_BOVIN" tr|C7FE01|C7FE01_BOVIN" tr|Q19KS1|Q19KS1_BOVIN" tr|Q6LBN7|Q6LBN7_BOVIN"	SALGFLRIPSKVD	701.9063++	2	701.906	SALGFLRIPSKVD	246174992
sp|P24627|TRFL_BOVIN" tr|B9VPZ5|B9VPZ5_BOVIN" tr|C7FE01|C7FE01_BOVIN" tr|Q19KS1|Q19KS1_BOVIN" tr|Q6LBN7|Q6LBN7_BOVIN"	VAFVKETTVFENLPEKAD	679.6895+++	3	679.689	VAFVKETTVFENLPEKAD	49787648
sp|P24627|TRFL_BOVIN" tr|B9VPZ5|B9VPZ5_BOVIN" tr|C7FE01|C7FE01_BOVIN" tr|Q19KS1|Q19KS1_BOVIN" tr|Q6LBN7|Q6LBN7_BOVIN"	GAGDVAFVKETTVFENLPEKADRD	870.1012+++ 652.8277++++	3 4	870.101163 652.827691	GAGDVAFVKETTVFENLPEKADRD	169755392
sp|P24627|TRFL_BOVIN" tr|B9VPZ5|B9VPZ5_BOVIN" tr|C7FE01|C7FE01_BOVIN" tr|Q19KS1|Q19KS1_BOVIN" tr|Q6LBN7|Q6LBN7_BOVIN"	PYKLRPVAAEIYGTKE	612.3402+++	3	612.34	PYKLRPVAAEIYGTKE	148626736
sp|P26779|SAP_BOVIN"	NVIPALGLVEPIKKD	803.4823++	2	803.482	NVIPALGLVEPIKKD	85312136
sp|P31096|OSTP_BOVIN"	RSNVQSPDATEEDFTSHIESEEMHD	964.0738+++	3	964.074	RSNVQSPDATEEDFTSHIESEEMHD	333611776
sp|P31096|OSTP_BOVIN"	ATEEDFTSHIESEEMHD	1083.8660++	2	1083.87	AT[+80]EEDFTSHIES[+80]EEMHD	1505579776
sp|P31096|OSTP_BOVIN"	SNVQSPDATEEDFTSHIESEEMHD	965.3510+++ 965.3510+++	3 3	965.350968 965.350968	SNVQSPDAT[+80]EEDFTS[+80]HIESEEMHD SNVQSPDAT[+80]EEDFT[+80]SHIESEEMHD	84402241536
sp|P31096|OSTP_BOVIN"	KLDLDHKSEEDKHLKIR	546.7848++++	4	546.785	KLDLDHKS[+80]EEDKHLKIR	916238144
sp|P31096|OSTP_BOVIN"	APKKTSQLTDHSKETNSSELSKELTPKAKD	865.4167++++	4	865.417	APKKTSQLTDHSKET[+80]NS[+80]SELSKELTPKAKD	8058211328
sp|P31096|OSTP_BOVIN"	APKKTSQLTDHSKETNSSELSKELTPKAKD	865.4167++++	4	865.417	APKKTSQLTDHS[+80]KETNSSELS[+80]KELTPKAKD	8058211328
sp|P31096|OSTP_BOVIN"	LDHKSEEDKHLKIR	583.3198+++ 437.7417++++	3 4	583.319837 437.741696	LDHKSEEDKHLKIR	1658932880
sp|P31096|OSTP_BOVIN"	APKKTSQLTDHSKETNSSELSKELTPK	746.8938++++	4	746.894	APKKTSQLTDHSKETNSSELSKELTPK	1547542528
sp|P31096|OSTP_BOVIN"	HSKETNSSELSKELTPKAKD	558.0394++++	4	558.039	HSKETNSSELSKELTPKAKD	356251040
sp|P31096|OSTP_BOVIN"	SNVQSPDATEEDFTSHIESEEMHD	938.6955+++	3	938.696	SNVQSPDATEEDFT[+80]SHIESEEMHD	11321190400
sp|P31096|OSTP_BOVIN"	SNVQSPDATEEDFTSHIESEEMHD	938.6955+++	3	938.696	SNVQS[+80]PDATEEDFTSHIESEEMHD	11321190400
sp|P31096|OSTP_BOVIN"	RSNVQSPDATEEDFTSHIESEEMHD	763.2903++++	4	763.29	RSNVQSPDAT[+80]EEDFT[+80]SHIESEEMHD	1431052800
sp|P31096|OSTP_BOVIN"	FTSHIESEEMHD	731.3012++ 487.8699+++	2 3	731.30118 487.869879	FTSHIESEEMHD	12283482624
sp|P31096|OSTP_BOVIN"	LDHKSEEDKHLKI	531.2861+++ 398.7164++++	3 4	531.286133 398.716419	LDHKSEEDKHLKI	469066688
sp|P31096|OSTP_BOVIN"	FTSHIESEEMHD	811.2675++	2	811.268	FT[+80]SHIES[+80]EEMHD	1274343424
sp|P31096|OSTP_BOVIN"	FTSHIESEEMHD	739.2986++ 493.2015+++	2 3	739.298638 493.201517	FTSHIESEEM[+16]HD	1072616544
sp|P31096|OSTP_BOVIN"	APKKTSQLTDHSKETNSSELS	763.3837+++	3	763.384	APKKTSQLTDHSKETNSSELS	47406528
sp|P31096|OSTP_BOVIN"	APKKTSQLTDHSKETNSSELSKELTPKAKD	845.4252++++	4	845.425	APKKTSQLTDHS[+80]KETNSSELSKELTPKAKD	5188990976
sp|P31096|OSTP_BOVIN"	APKKTSQLTDHSKETNSSELSKELTPKAKD	845.4252++++	4	845.425	APKKTS[+80]QLTDHSKETNSSELSKELTPKAKD	5188990976
sp|P31096|OSTP_BOVIN"	SNVQSPDATEEDFTSHIESEEMHD	1447.5228++ 965.3510+++	2 3	1447.522814 965.350968	SNVQSPDAT[+80]EEDFTSHIES[+80]EEMHD	48623285248
sp|P31096|OSTP_BOVIN"	APKKTSQLTDHSKETNSSELSKELTPKAKD	1126.8978+++ 845.4252++++	3 4	1126.897796 845.425166	APKKTSQLTDHSKET[+80]NSSELSKELTPKAKD	5834184000
sp|P31096|OSTP_BOVIN"	APKKTSQLTDHSKETNSSELSKELTPKAKD	1126.8978+++	3	1126.9	APKKTSQLT[+80]DHSKETNSSELSKELTPKAKD	645193024
sp|P31096|OSTP_BOVIN"	HSKETNSSELSKELTPKAKD	578.0310++++ 578.0310++++ 578.0310++++	4 4 4	578.030973 578.030973 578.030973	HSKETNSSELS[+80]KELTPKAKD HSKETNS[+80]SELSKELTPKAKD HS[+80]KETNSSELSKELTPKAKD	4969769472
sp|P31096|OSTP_BOVIN"	SNVQSPDATEEDFTSHIESEEMHD	1487.5060++ 992.0064+++	2 3	1487.505979 992.006411	SNVQSPDAT[+80]EEDFT[+80]SHIES[+80]EEMHD	6478136064
sp|P31096|OSTP_BOVIN"	SNVQSPDATEEDFTSHIESEEMH	927.0087+++	3	927.009	SNVQSPDAT[+80]EEDFTSHIES[+80]EEMH	1913974272
sp|P31096|OSTP_BOVIN"	SNVQSPDATEEDFTSHIESEEMHD	1407.5396++ 938.6955+++ 1407.5396++ 938.6955+++	2 3 2 3	1407.539648 938.695524 1407.539648 938.695524	SNVQSPDATEEDFTSHIES[+80]EEMHD SNVQSPDAT[+80]EEDFTSHIESEEMHD	24766355712
sp|P31096|OSTP_BOVIN"	APKKTSQLTDHSKETNSSELSKELTPKAKD	1153.5532+++ 865.4167++++	3 4	1153.55324 865.416749	APKKTSQLTDHS[+80]KET[+80]NSSELSKELTPKAKD	9416249216
sp|P31096|OSTP_BOVIN"	IRISHELDSASSEVN	828.9130++	2	828.913	IRISHELDSASSEVN	1940909056
sp|P31096|OSTP_BOVIN"	KLDLDHKSEEDKHL	853.9390++ 569.6284+++ 427.4732++++	2 3 4	853.939033 569.628447 427.473154	KLDLDHKSEEDKHL	6926316088
sp|P31096|OSTP_BOVIN"	APKKTSQLTDHSKETNSSELSKELTPKAKD	885.4083++++ 885.4083++++	4 4	885.408332 885.408332	APKKT[+80]S[+80]QLTDHSKETNSSELS[+80]KELTPKAKD APKKT[+80]S[+80]QLTDHSKETNSS[+80]ELSKELTPKAKD	11400172544
sp|P31096|OSTP_BOVIN"	KLDLDHKSEEDKHL	893.9222++ 596.2839+++ 447.4647++++	2 3 4	893.922198 596.283891 447.464737	KLDLDHKS[+80]EEDKHL	8879190208
sp|P31096|OSTP_BOVIN"	HKSEEDKHLKIR	507.2828+++ 380.7139++++	3 4	507.282834 380.713945	HKSEEDKHLKIR	1546616368
sp|P31096|OSTP_BOVIN"	SNVQSPDATEEDFTSHIESEEMHD	1447.5228++	2	1447.52	SNVQS[+80]PDATEEDFTSHIES[+80]EEMHD	6421180416
sp|P31096|OSTP_BOVIN"	APKKTSQLTDHSKETNSSELSKE	902.4071+++ 677.0571++++	3 4	902.407077 677.057126	APKKTSQLTDHS[+80]KET[+80]NSSELSKE APKKTSQLTDHS[+80]KETNS[+80]SELSKE	415530000
sp|P31096|OSTP_BOVIN"	FTSHIESEEMHD	771.2843++ 771.2843++	2 2	771.284346 771.284346	FTSHIES[+80]EEMHD FT[+80]SHIESEEMHD	23502493696
sp|P31096|OSTP_BOVIN"	SNVQSPDATEEDFTSHIESEEMH	900.3532+++	3	900.353	SNVQSPDAT[+80]EEDFTSHIESEEMH	415173344
sp|P31096|OSTP_BOVIN"	DKLDLDHKSEEDKHL	456.2299++++	4	456.23	DKLDLDHKSEEDKHL	77686848
sp|P31096|OSTP_BOVIN"	APKKTSQLTDHSKETNSSELSKELTPKA	784.6447++++	4	784.645	APKKTSQLTDHS[+80]KETNSSELSKELTPKA	273704704
sp|P31096|OSTP_BOVIN"	KFRRSNVQSPDATEED	626.9695+++	3	626.97	KFRRSNVQSPDATEED	46842600
sp|P31096|OSTP_BOVIN"	FRRSNVQSPDATEED	584.2712+++	3	584.271	FRRSNVQSPDATEED	190733776
sp|P31096|OSTP_BOVIN"	APKKTSQLTDHSKETNSSELSKELTPK	786.8770++++	4	786.877	APKKT[+80]SQLTDHS[+80]KETNSSELSKELTPK	1905708032
sp|P31096|OSTP_BOVIN"	APKKTSQLTDHSKETNSSELSKELTPKAKD	1153.5532+++	3	1153.55	APKKTSQLTDHSKETNS[+80]S[+80]ELSKELTPKAKD	1358502784
sp|P31096|OSTP_BOVIN"	LDHKSEEDKHLKIR	609.9753+++ 457.7333++++	3 4	609.97528 457.733279	LDHKS[+80]EEDKHLKIR	1627204800
sp|P31096|OSTP_BOVIN"	RSNVQSPDATEEDFTSHIESEEMHD	1525.5734++ 1017.3847+++ 763.2903++++	2 3 4	1525.573369 1017.384671 763.290323	RSNVQSPDAT[+80]EEDFTSHIES[+80]EEMHD	7619462048
sp|P31096|OSTP_BOVIN"	HKSEEDKHLKIR	533.9383+++ 400.7055++++	3 4	533.938278 400.705527	HKS[+80]EEDKHLKIR	1506161248
sp|P31096|OSTP_BOVIN"	DKLDLDHKSEEDKHLK	488.2536++++	4	488.254	DKLDLDHKSEEDKHLK	44480380
sp|P31096|OSTP_BOVIN"	RSNVQSPDATEEDFTSHIESEEMHD	1044.0401+++	3	1044.04	RSNVQSPDAT[+80]EEDFT[+80]SHIES[+80]EEMHD	787031808
sp|P31096|OSTP_BOVIN"	APKKTSQLTDHSKETNSSELSKE	875.7516+++ 875.7516+++ 657.0655++++	3 3 4	875.751633 875.751633 657.065544	APKKTSQLTDHSKETNS[+80]SELSKE APKKTSQLTDHS[+80]KETNSSELSKE	366448132
sp|P31096|OSTP_BOVIN"	RISHELDSASSEVN	772.3710++ 515.2497+++	2 3	772.370983 515.249747	RISHELDSASSEVN	196684720
sp|P31096|OSTP_BOVIN"	RSNVQSPDATEEDFTSHIESEEMHD	990.7292+++	3	990.729	RSNVQSPDATEEDFTSHIES[+80]EEMHD	963434688
sp|P31096|OSTP_BOVIN"	FTSHIESEEMHDAPKKTSQLTD	871.0509+++	3	871.051	FTSHIES[+80]EEMHDAPKKTSQLTD	996688192
sp|P31096|OSTP_BOVIN"	HSKETNSSELSKELTPK	638.9971+++ 479.4996++++	3 4	638.997088 479.499635	HSKETNSSELSKELTPK	424826696
sp|P31096|OSTP_BOVIN"	APKKTSQLTDHSKETNSSELSKELTPKAKDK	897.4405++++	4	897.44	APKKTSQLTDHS[+80]KET[+80]NSSELSKELTPKAKDK	153527040
sp|P31096|OSTP_BOVIN"	HKSEEDKHLKI	455.2491+++	3	455.249	HKSEEDKHLKI	174117888
sp|P31096|OSTP_BOVIN"	ATEEDFTSHIESEEMHD	1003.8996++ 669.6022+++	2 3	1003.899641 669.602186	ATEEDFTSHIESEEMHD	2352617984
sp|P31096|OSTP_BOVIN"	APKKTSQLTDHSKETNSSEL	761.0284+++	3	761.028	APKKTSQLTDHSKETNS[+80]SEL	124053360
sp|P31096|OSTP_BOVIN"	KHLKIRISHELDSASSEVN	1122.0626++ 561.5350++++	2 4	1122.062631 561.534954	KHLKIRIS[+80]HELDSASSEVN	3049798608
sp|P31096|OSTP_BOVIN"	ATEEDFTSHIESEEMHD	1043.8828++ 696.2576+++	2 3	1043.882807 696.25763	ATEEDFTSHIES[+80]EEMHD	1715089408
sp|P31096|OSTP_BOVIN"	TSHIESEEMHDAPKKTSQLTD	596.7813++++	4	596.781	TSHIESEEMHDAPKKTSQLTD	153884560
sp|P31096|OSTP_BOVIN"	HSNLIESQENSKLSQEFHSLED	857.7368+++	3	857.737	HSNLIESQENSKLSQEFHSLED	95865176
sp|P31096|OSTP_BOVIN"	RSNVQSPDATEEDFTSHIESEEMHD	743.2987++++ 743.2987++++	4 4	743.29874 743.29874	RSNVQSPDATEEDFT[+80]SHIESEEMHD RSNVQSPDAT[+80]EEDFTSHIESEEMHD	608447360
sp|P31096|OSTP_BOVIN"	DKLDLDHKSEEDKHLK	508.2452++++	4	508.245	DKLDLDHKS[+80]EEDKHLK	134526800
sp|P31096|OSTP_BOVIN"	KLDLDHKSEEDKHLK	957.9697++ 638.9822+++ 479.4885++++	2 3 4	957.96968 638.982212 479.488478	KLDLDHKS[+80]EEDKHLK	11193679052
sp|P31096|OSTP_BOVIN"	SNVQSPDATEEDFTSHIESEEMHD	1367.5565++ 912.0401+++	2 3	1367.556483 912.04008	SNVQSPDATEEDFTSHIESEEMHD	6505073056
sp|P31096|OSTP_BOVIN"	LDHKSEEDKHLKI	418.7080++++	4	418.708	LDHKS[+80]EEDKHLKI	136901680
sp|P31096|OSTP_BOVIN"	KNKHSNLIESQENSKLSQE	554.0344++++	4	554.034	KNKHSNLIESQENSKLSQE	129512848
sp|P31096|OSTP_BOVIN"	DAPKKTSQLTDHSKETNSSELSKELTPKAKD	874.1819++++	4	874.182	DAPKKTSQLTDHSKETNS[+80]SELSKELTPKAKD	331983904
sp|P31096|OSTP_BOVIN"	KLDLDHKSEEDKHLKIR	526.7932++++	4	526.793	KLDLDHKSEEDKHLKIR	329567488
sp|P31096|OSTP_BOVIN"	HSKETNSSELSKELTPKAKD	797.0276+++ 797.0276+++ 598.0226++++	3 3 4	797.027648 797.027648 598.022555	HSKET[+80]NS[+80]SELSKELTPKAKD HS[+80]KET[+80]NSSELSKELTPKAKD	875022592
sp|P31096|OSTP_BOVIN"	FTSHIESEEMH	713.7709++	2	713.771	FTSHIES[+80]EEMH	569822464
sp|P31096|OSTP_BOVIN"	SNVQSPDATEEDFTSHIESEEMH	873.6978+++	3	873.698	SNVQSPDATEEDFTSHIESEEMH	164987680
sp|P31096|OSTP_BOVIN"	HSKETNSSELSKELTPKAKDKNK	670.5892++++	4	670.589	HSKET[+80]NSSELSKELTPKAKDKNK	50862912
sp|P31096|OSTP_BOVIN"	DHKSEEDKHLKIR	409.4707++++	4	409.471	DHKSEEDKHLKIR	13163393
sp|P31096|OSTP_BOVIN"	KLDLDHKSEEDKHLK	917.9865++ 612.3268+++ 459.4969++++	2 3 4	917.986514 612.326768 459.496895	KLDLDHKSEEDKHLK	3833855712
sp|P31096|OSTP_BOVIN"	APKKTSQLTDHSKETNSSELSKELTPK	766.8854++++	4	766.885	APKKTSQLTDHS[+80]KETNSSELSKELTPK	1143997568
sp|P31096|OSTP_BOVIN"	KLDLDHKSEEDKHLKI	487.7679++++	4	487.768	KLDLDHKSEEDKHLKI	374174560
sp|P31096|OSTP_BOVIN"	SNVQSPDATEEDFTSH	922.3545++	2	922.355	SNVQSPDAT[+80]EEDFTSH	266892480
sp|P31096|OSTP_BOVIN"	HKSEEDKHLKIRISH	465.0077++++	4	465.008	HKSEEDKHLKIRISH	84004784
sp|P31096|OSTP_BOVIN"	KNKHSNLIESQENSKLS	652.6763+++ 489.7591++++	3 4	652.676349 489.75908	KNKHSNLIESQENSKLS	53870412
sp|P31096|OSTP_BOVIN"	SSELSKELTPKAKD	511.6104+++	3	511.61	SSELSKELTPKAKD	201399200
sp|P31096|OSTP_BOVIN"	APKKTSQLTDHSKETNSSELSKE	849.0962+++	3	849.096	APKKTSQLTDHSKETNSSELSKE	13618646
sp|P31096|OSTP_BOVIN"	KNKHSNLIESQENSK	585.9710+++ 439.7301++++	3 4	585.970984 439.730057	KNKHSNLIESQENSK	110134648
sp|P31096|OSTP_BOVIN"	APKKTSQLTDHSKETNSSELSKELTPKAK	816.6684++++	4	816.668	APKKTSQLTDHSKET[+80]NSSELSKELTPKAK	129095200
sp|P31096|OSTP_BOVIN"	ATEEDFTSHIESEEMHD	1011.8971++ 674.9338+++	2 3	1011.897099 674.933825	ATEEDFTSHIESEEM[+16]HD	514723992
sp|P31096|OSTP_BOVIN"	TSHIESEEMHD	697.7501++ 465.5025+++	2 3	697.750139 465.502518	TSHIES[+80]EEMHD	314728796
sp|P31096|OSTP_BOVIN"	HKSEEDKHLKI	481.9046+++ 361.6802++++	3 4	481.904574 361.68025	HKS[+80]EEDKHLKI	95311056
sp|P31096|OSTP_BOVIN"	AKDKNKHSNLIESQENSK	518.2698++++	4	518.27	AKDKNKHSNLIESQENSK	3536884
sp|P31096|OSTP_BOVIN"	ISHELDSASSEVN	694.3204++	2	694.32	ISHELDSASSEVN	161679040
sp|P31096|OSTP_BOVIN"	KTSQLTDHSKETNSSELSKELTPKAKD	791.3705++++	4	791.371	KTSQLTDHS[+80]KET[+80]NSSELSKELTPKAKD	146919952
sp|P31096|OSTP_BOVIN"	KLDLDHKSEEDK	486.2475+++ 364.9374++++	3 4	486.247455 364.93741	KLDLDHKSEEDK	18401269
sp|P31096|OSTP_BOVIN"	APKKTSQLTDHSKETNSSELSKELTPKAKD	1100.2424+++	3	1100.24	APKKTSQLTDHSKETNSSELSKELTPKAKD	125360928
sp|P31096|OSTP_BOVIN"	KHLKIRISHELDSASSEVN	721.7221+++ 541.5434++++	3 4	721.722069 541.543371	KHLKIRISHELDSASSEVN	583909792
sp|P31096|OSTP_BOVIN"	HSKETNSSELSKELTPKAKD	770.3722+++	3	770.372	HSKET[+80]NSSELSKELTPKAKD	476393888
sp|P31096|OSTP_BOVIN"	APKKTSQLTDHSKETNSSELSK	832.7374+++ 624.8049++++	3 4	832.737435 624.804895	APKKTSQLTDHSKET[+80]NSSELSK	118329458
sp|P31096|OSTP_BOVIN"	KTSQLTDHSKETNSSELSKELTPK	692.8392++++	4	692.839	KTSQLTDHSKET[+80]NSSELSKELTPK	126309472
sp|P31096|OSTP_BOVIN"	TSHIESEEMHDAPKKTSQLTD	822.0281+++	3	822.028	TSHIES[+80]EEMHDAPKKTSQLTD	18078816
sp|P31096|OSTP_BOVIN" tr|Q58DM6|Q58DM6_BOVIN"	SVAYGLKSRSKKFR	542.9861+++ 407.4914++++	3 4	542.986129 407.491416	SVAYGLKSRSKKFR	467686920
sp|P31096|OSTP_BOVIN" tr|Q58DM6|Q58DM6_BOVIN"	GRGDSVAYGLKSRSKKF	619.3428+++ 464.7589++++	3 4	619.342753 464.758883	GRGDSVAYGLKSRSKKF	15077370880
sp|P31096|OSTP_BOVIN" tr|Q58DM6|Q58DM6_BOVIN"	LPVKPTSSGSSEEKQLNNKYPDAVATWLKPD	870.6828++++	4	870.683	LPVKPT[+80]SSGSSEEKQLNNKYPDAVATWLKPD	2054711296
sp|P31096|OSTP_BOVIN" tr|Q58DM6|Q58DM6_BOVIN"	GRGDSVAYGLKSRSK	527.6216+++ 395.9680++++	3 4	527.621627 395.968039	GRGDSVAYGLKSRSK	178757388
sp|P31096|OSTP_BOVIN" tr|Q58DM6|Q58DM6_BOVIN"	GRGDSVAYGLKSR	455.9126+++	3	455.913	GRGDSVAYGLKSR	442459840
sp|P31096|OSTP_BOVIN" tr|Q58DM6|Q58DM6_BOVIN"	TPFIPTESANDGRGD	788.8655++	2	788.866	TPFIPTESANDGRGD	856318336
sp|P31096|OSTP_BOVIN" tr|Q58DM6|Q58DM6_BOVIN"	SVAYGLKSRSKKF	735.9250++ 490.9524+++ 368.4661++++	2 3 4	735.925 490.952425 368.466138	SVAYGLKSRSKKF	10910134048
sp|P31096|OSTP_BOVIN" tr|Q58DM6|Q58DM6_BOVIN"	AVATWLKPDPSQK	720.8959++ 480.9330+++	2 3	720.895908 480.933031	AVATWLKPDPSQK	2280184640
sp|P31096|OSTP_BOVIN" tr|Q58DM6|Q58DM6_BOVIN"	GRGDSVAYGLKSRS	484.9233+++	3	484.923	GRGDSVAYGLKSRS	83523920
sp|P31096|OSTP_BOVIN" tr|Q58DM6|Q58DM6_BOVIN"	LPVKPTSSGSSEEKQLNNKYPD	806.7431+++ 605.3091++++	3 4	806.743087 605.309134	LPVKPTSSGSSEEKQLNNKYPD	1289598752
sp|P31096|OSTP_BOVIN" tr|Q58DM6|Q58DM6_BOVIN"	LPVKPTSSGSSEEKQLNNKYPDAVATWLKPDPSQ	948.7187++++	4	948.719	LPVKPT[+80]SSGSSEEKQLNNKYPDAVATWLKPDPSQ	138142368
sp|P31096|OSTP_BOVIN" tr|Q58DM6|Q58DM6_BOVIN"	GRGDSVAYGLK	561.7987++ 374.8682+++	2 3	561.798737 374.86825	GRGDSVAYGLK	111056304
sp|P31096|OSTP_BOVIN" tr|Q58DM6|Q58DM6_BOVIN"	GRGDSVAYGLKSRSKK	427.9918++++	4	427.992	GRGDSVAYGLKSRSKK	48704712
sp|P31096|OSTP_BOVIN" tr|Q58DM6|Q58DM6_BOVIN"	DSVAYGLKSRSKKF	529.2947+++	3	529.295	DSVAYGLKSRSKKF	100720864
sp|P31096|OSTP_BOVIN" tr|Q58DM6|Q58DM6_BOVIN"	LPVKPTSSGSSEEKQLNNKYPDAVATWLKPD	850.6912++++	4	850.691	LPVKPTSSGSSEEKQLNNKYPDAVATWLKPD	337971872
sp|P31096|OSTP_BOVIN" tr|Q58DM6|Q58DM6_BOVIN"	PSQKQTFLAPQN	679.8568++	2	679.857	PSQKQTFLAPQN	198524784
sp|P46201|UTMP_BOVIN" tr|C4PU73|C4PU73_BOVIN"	LPKIDPK	405.7578++	2	405.758	LPKIDPK	9414874112
sp|P58073|PTHR_BOVIN"	VAGTGLEEDYLSDISATSLELNSRRH	729.0961++++	4	729.096	VAGTGLEEDYLSDISAT[+80]SLELNSRRH	114871768
sp|P58073|PTHR_BOVIN"	AVSEHQLLHDKGKSIQD	477.0011++++	4	477.001	AVSEHQLLHDKGKSIQD	163683216
sp|P58073|PTHR_BOVIN"	TAEIRATSEVSPNSKPAPNTK	733.3852+++	3	733.385	TAEIRATSEVSPNSKPAPNTK	35753992
sp|P58073|PTHR_BOVIN"	VAGTGLEEDYLSDISATSLELNSRRH	709.1045++++	4	709.105	VAGTGLEEDYLSDISATSLELNSRRH	111955688
sp|P58073|PTHR_BOVIN"	AVSEHQLLHDKGKSIQDL	673.3604+++	3	673.36	AVSEHQLLHDKGKSIQDL	610177088
sp|P58073|PTHR_BOVIN"	RAVSEHQLLHDKGKSIQD	516.0264++++	4	516.026	RAVSEHQLLHDKGKSIQD	71145792
sp|P80025|PERL_BOVIN"	KLDLSPWASREN	708.3675++	2	708.368	KLDLSPWASREN	322816928
sp|P80195|GLCM1_BOVIN"	ASAQFIRNL	510.2853++	2	510.285	ASAQFIRNL	5957105152
sp|P80195|GLCM1_BOVIN"	ETHLEAQPTDASAQF	822.8786++	2	822.879	ETHLEAQPTDASAQF	2214000384
sp|P80195|GLCM1_BOVIN"	ILNKPEDETHLEAQPTD	975.4762++ 650.6532+++	2 3	975.476176 650.65321	ILNKPEDETHLEAQPTD	375241539584
sp|P80195|GLCM1_BOVIN"	ILNKPEDETHLE	719.3646++ 479.9122+++	2 3	719.364638 479.912184	ILNKPEDETHLE	9707304960
sp|P80195|GLCM1_BOVIN"	LISKEQIVIR	599.8795++ 400.2554+++	2 3	599.87953 400.255445	LISKEQIVIR	36013736960
sp|P80195|GLCM1_BOVIN"	LNKPEDETHLEAQPTD	918.9341++ 612.9585+++	2 3	918.934144 612.958522	LNKPEDETHLEAQPTD	35980516864
sp|P80195|GLCM1_BOVIN"	ILNKPEDETHLEAQPT	917.9627++ 612.3109+++	2 3	917.962705 612.310895	ILNKPEDETHLEAQPT	18766901248
sp|P80195|GLCM1_BOVIN"	ILNKPEDETHLEA	754.8832++ 503.5912+++	2 3	754.883195 503.591222	ILNKPEDETHLEA	1742988032
sp|P80195|GLCM1_BOVIN"	LISKEQIVIRSS	726.8947++	2	726.895	LIS[+80]KEQIVIRSS	1056310272
sp|P80195|GLCM1_BOVIN"	ILNKPEDETHLEAQPTDASAQFIRNLQISNED	1239.5862+++ 929.9414++++	3 4	1239.586169 929.941446	ILNKPEDETHLEAQPTDAS[+80]AQFIRNLQISNED ILNKPEDETHLEAQPTDASAQFIRNLQIS[+80]NED	5977331584
sp|P80195|GLCM1_BOVIN"	ILNKPEDETHLEAQ	818.9125++ 546.2774+++	2 3	818.912484 546.277414	ILNKPEDETHLEAQ	2298873344
sp|P80195|GLCM1_BOVIN"	LSKEPSISREDLISKEQIVIR	630.8413++++	4	630.841	LSKEPS[+80]ISREDLISKEQIVIR	5336778752
sp|P80195|GLCM1_BOVIN"	LISKEQIVIR	639.8627++ 426.9109+++	2 3	639.862695 426.910889	LIS[+80]KEQIVIR	26648439808
sp|P80195|GLCM1_BOVIN"	IRNLQISNED	601.3122++	2	601.312	IRNLQISNED	6123780096
sp|P80195|GLCM1_BOVIN"	ILNKPEDETHLEAQPTDASAQFIR	908.4594+++ 681.5963++++	3 4	908.45935 681.596332	ILNKPEDETHLEAQPTDASAQFIR	4537876992
sp|P80195|GLCM1_BOVIN"	ASAQFIRNLQISNED	853.4288++ 569.2883+++	2 3	853.428832 569.288313	ASAQFIRNLQISNED	2373347152
sp|P80195|GLCM1_BOVIN"	SSRQPQSQNPKLPLSILKEKHL	632.8631++++	4	632.863	SSRQPQSQNPKLPLSILKEKHL	514374656
sp|P80195|GLCM1_BOVIN"	SSRQPQSQNPKLPL	527.2899+++	3	527.29	SSRQPQSQNPKLPL	403341248
sp|P80195|GLCM1_BOVIN"	NKPEDETHLEAQPTD	862.3921++ 575.2638+++	2 3	862.392112 575.263834	NKPEDETHLEAQPTD	1832972480
sp|P80195|GLCM1_BOVIN"	LSKEPSISREDLISKEQIVIR	650.8329++++	4	650.833	LSKEPS[+80]IS[+80]REDLISKEQIVIR	2496772096
sp|P80195|GLCM1_BOVIN"	LNKPEDETHLEAQPT	574.6162+++	3	574.616	LNKPEDETHLEAQPT	939914368
sp|P80195|GLCM1_BOVIN"	ILNKPEDETHLEAQPTDASAQF	818.7310+++ 614.3000++++	3 4	818.730959 614.300038	ILNKPEDETHLEAQPTDASAQF	50729342272
sp|P80195|GLCM1_BOVIN"	ASTTEGKLMELGHKIM	582.6357+++ 437.2286++++	3 4	582.635668 437.22857	ASTTEGKLMELGHKIM	476713584
sp|P80195|GLCM1_BOVIN"	IRNLQISNEDLSKEPSISRED	815.0856+++ 611.5660++++	3 4	815.085625 611.566037	IRNLQISNEDLSKEPSISRED	3061196544
sp|P80195|GLCM1_BOVIN"	ISKEQIVIR	362.5608+++	3	362.561	ISKEQIVIR	496753312
sp|P80195|GLCM1_BOVIN"	SQNPKLPLSIL	605.3637++	2	605.364	SQNPKLPLSIL	502317408
sp|P80195|GLCM1_BOVIN"	LSKEPSISRED	670.8083++ 447.5413+++	2 3	670.808314 447.541301	LSKEPS[+80]ISRED LSKEPSIS[+80]RED	622531744
sp|P80195|GLCM1_BOVIN"	LSKEPSISREDLISKEQIVIR	894.0968+++	3	894.097	LSKEPS[+80]IS[+80]REDLIS[+80]KEQIVIR	1165838720
sp|P80195|GLCM1_BOVIN"	ILNKPEDETHLEAQPTDASAQFIRNLQISNED	1212.9307+++	3	1212.93	ILNKPEDETHLEAQPTDASAQFIRNLQISNED	1343434112
sp|P80195|GLCM1_BOVIN"	LSKEPSISREDLISKEQIVI	762.0968+++ 571.8244++++	3 4	762.096802 571.82442	LSKEPSISREDLISKEQIVI	551919280
sp|P80195|GLCM1_BOVIN"	LNKPEDETHLEAQPTDASAQF	1171.0508++ 781.0363+++	2 3	1171.050768 781.036271	LNKPEDETHLEAQPTDASAQF	3805987008
sp|P80195|GLCM1_BOVIN"	SSRQPQSQNPKLPLSIL	631.6899+++	3	631.69	SSRQPQSQNPKLPLSIL	1371565568
sp|P80195|GLCM1_BOVIN"	LNKPEDETHLE	442.2175+++	3	442.217	LNKPEDETHLE	221519136
sp|P80195|GLCM1_BOVIN"	KPEDETHLEAQPTD	805.3706++ 537.2495+++	2 3	805.370649 537.249524	KPEDETHLEAQPTD	197068676
sp|P80195|GLCM1_BOVIN"	PSISREDLISKEQIVIR	661.7126+++	3	661.713	PSISREDLISKEQIVIR	32873988
sp|P80195|GLCM1_BOVIN"	LSKEPSISRED	630.8251++ 420.8859+++	2 3	630.825149 420.885858	LSKEPSISRED	418165472
sp|P80195|GLCM1_BOVIN"	LNKPEDETHLEAQPTDASAQFIRNL	946.4737+++ 710.1071++++	3 4	946.47366 710.107064	LNKPEDETHLEAQPTDASAQFIRNL	1048369120
sp|P80195|GLCM1_BOVIN"	ETHLEAQPTDASAQFIR	957.4712++	2	957.471	ETHLEAQPTDASAQFIR	152972704
sp|P80195|GLCM1_BOVIN"	RNLENTVKETIKY	536.6299+++	3	536.63	RNLENTVKETIKY	704925632
sp|P80195|GLCM1_BOVIN"	ASAQFIRNLQISNEDLSKEPSISRED	983.1634+++ 737.6243++++	3 4	983.163374 737.624349	ASAQFIRNLQISNEDLSKEPSISRED	1257575488
sp|P80195|GLCM1_BOVIN"	LKSLFSHAFEVVKT	803.4536++ 535.9715+++	2 3	803.45359 535.971486	LKSLFSHAFEVVKT	1649458240
sp|P80195|GLCM1_BOVIN"	PSISREDLISKEQIVIR	688.3681+++ 516.5279++++	3 4	688.368066 516.527869	PSISREDLIS[+80]KEQIVIR PSIS[+80]REDLISKEQIVIR	503675464
sp|P80195|GLCM1_BOVIN"	ETHLEAQPTDASAQFIRNL	1071.0347++ 714.3589+++	2 3	1071.034724 714.358908	ETHLEAQPTDASAQFIRNL	651679696
sp|P80195|GLCM1_BOVIN"	ILNKPEDETHLEAQPTDAS	1054.5107++ 703.3429+++	2 3	1054.510748 703.342924	ILNKPEDETHLEAQPTDAS	615176000
sp|P80195|GLCM1_BOVIN"	ILNKPEDETHLEAQPTDASAQFIRN	973.1291+++	3	973.129	ILNKPEDETHLEAQPTDAS[+80]AQFIRN	262771344
sp|P80195|GLCM1_BOVIN"	LNKPEDETHLEAQPTDASAQFIR	870.7647+++ 653.3253++++	3 4	870.764662 653.325316	LNKPEDETHLEAQPTDASAQFIR	856095232
sp|P80195|GLCM1_BOVIN"	NTVKETIKY	365.8730+++	3	365.873	NTVKETIKY	132122112
sp|P80195|GLCM1_BOVIN"	ASTTEGKLMEL	590.2999++	2	590.3	ASTTEGKLMEL	510524224
sp|P80195|GLCM1_BOVIN"	LNKPEDETHLEAQPTDASAQFIRNLQISNED	1201.8915+++ 901.6704++++	3 4	1201.891481 901.67043	LNKPEDETHLEAQPTDASAQFIRNLQIS[+80]NED	262475024
sp|P80195|GLCM1_BOVIN"	ASAQFIRNLQISNEDLSKEPSISRED	757.6159++++	4	757.616	ASAQFIRNLQIS[+80]NEDLSKEPSISRED	138074304
sp|P80195|GLCM1_BOVIN"	ILNKPEDETHLEAQPTDASAQFIRNLQ	1026.8545+++	3	1026.85	ILNKPEDETHLEAQPTDASAQFIRNLQ	40910872
sp|P80195|GLCM1_BOVIN"	ILNKPEDETHLEAQPTDASAQFIRNL	1475.7489++ 984.1683+++ 738.3781++++	2 3 4	1475.748883 984.168348 738.37808	ILNKPEDETHLEAQPTDASAQFIRNL	17817121912
sp|P80195|GLCM1_BOVIN"	ASAQFIRNLQISNEDLSKE	721.7062+++	3	721.706	ASAQFIRNLQISNEDLSKE	68048440
sp|P80195|GLCM1_BOVIN"	AILNKPEDETHLEAQPTD	1010.9947++ 674.3322+++	2 3	1010.994733 674.332248	AILNKPEDETHLEAQPTD	327265876
sp|P80195|GLCM1_BOVIN"	ILNKPEDETHL	654.8433++ 436.8980+++	2 3	654.843341 436.897986	ILNKPEDETHL	1938662240
sp|P80195|GLCM1_BOVIN"	FSHAFEVVKT	582.8060++ 388.8731+++	2 3	582.806031 388.873112	FSHAFEVVKT	1880923008
sp|P80195|GLCM1_BOVIN"	ETHLEAQPTDASAQFIRNLQISNED	943.1213+++	3	943.121	ETHLEAQPTDASAQFIRNLQISNED	235718880
sp|P80195|GLCM1_BOVIN"	ILNKPEDETHLEAQPTDASA	1090.0293++ 727.0220+++	2 3	1090.029304 727.021962	ILNKPEDETHLEAQPTDASA	1091305520
sp|P80195|GLCM1_BOVIN"	IRNLQISNEDLSKEPSISRE	582.8093++++	4	582.809	IRNLQISNEDLSKEPSISRE	158868032
sp|P80195|GLCM1_BOVIN"	ILNKPEDETHLEAQPTDASAQFIRN	946.4737+++	3	946.474	ILNKPEDETHLEAQPTDASAQFIRN	420854144
sp|P80195|GLCM1_BOVIN"	ILNKPEDETHLEAQPTDA	1010.9947++ 674.3322+++	2 3	1010.994733 674.332248	ILNKPEDETHLEAQPTDA	1398001024
sp|P80195|GLCM1_BOVIN"	ILNKPEDETHLEAQPTDASAQFIRNLQISNEDLSKEPSISRED	1280.3309++++	4	1280.33	ILNKPEDETHLEAQPTDAS[+80]AQFIRNLQISNEDLSKEPS[+80]IS[+80]RED	95970704
sp|P80195|GLCM1_BOVIN"	LKSLFSHAF	525.2926++ 350.5308+++	2 3	525.292559 350.530798	LKSLFSHAF	222723552
sp|P80195|GLCM1_BOVIN"	ASTTEGKLMELGHKIM	441.2273++++	4	441.227	ASTTEGKLMELGHKIM[+16]	38066928
sp|P80195|GLCM1_BOVIN"	ISKEQIVIR	583.3207++	2	583.321	IS[+80]KEQIVIR	373498560
sp|P80195|GLCM1_BOVIN"	IRNLQISNEDLSKE	869.9222++	2	869.922	IRNLQIS[+80]NEDLSKE	122736968
sp|P80195|GLCM1_BOVIN"	NKPEDETHLEAQPTDASAQF	743.3416+++	3	743.342	NKPEDETHLEAQPTDASAQF	154451872
sp|P80195|GLCM1_BOVIN"	LSKEPSISREDLISKEQIVIRSS	654.3657++++	4	654.366	LSKEPSISREDLISKEQIVIRSS	161997760
sp|P80195|GLCM1_BOVIN"	ILNKPEDETHLEAQPTDASAQ	1154.0586++ 769.7082+++	2 3	1154.058593 769.708154	ILNKPEDETHLEAQPTDASAQ	1685296440
sp|P80195|GLCM1_BOVIN"	LISKEQIVIRSS	686.9116++ 458.2768+++	2 3	686.911558 458.276798	LISKEQIVIRSS	1967446464
sp|P80195|GLCM1_BOVIN"	SILKEKHL	484.3004++	2	484.3	SILKEKHL	69236240
sp|P80195|GLCM1_BOVIN"	ILNKPEDETHLEAQPTDASAQFIRNLQISNE	1201.2439+++ 901.1847++++	3 4	1201.243855 901.18471	ILNKPEDETHLEAQPT[+80]DASAQFIRNLQISNE ILNKPEDETHLEAQPTDASAQFIRNLQIS[+80]NE	358086992
sp|P80195|GLCM1_BOVIN"	SSRQPQSQNPKLPLS	556.3006+++	3	556.301	SSRQPQSQNPKLPLS	772888064
sp|P80195|GLCM1_BOVIN"	ENTVKETIKY	408.8872+++	3	408.887	ENTVKETIKY	118136336
sp|P80195|GLCM1_BOVIN"	ILNKPEDETHLEAQPTDASAQFIRNLQISNEDL	958.2125++++	4	958.212	ILNKPEDETHLEAQPTDASAQFIRNLQIS[+80]NEDL	46537952
sp|P80195|GLCM1_BOVIN"	ILNKPEDETHLEAQPTDASAQFIRNLQI	798.6637++++	4	798.664	ILNKPEDETHLEAQPTDASAQFIRNLQI	55492232
sp|P80195|GLCM1_BOVIN"	ILNKPEDETHLEAQPTDASAQFIRNLQISNEDLSKE	1044.2549++++	4	1044.25	ILNKPEDETHLEAQPTDAS[+80]AQFIRNLQISNEDLSKE	14417124
sp|P80195|GLCM1_BOVIN"	DLISKEQIVIR	697.3762++	2	697.376	DLIS[+80]KEQIVIR	261062320
sp|P80195|GLCM1_BOVIN"	SSRQPQSQNPKLPLSILKEK	570.3274++++	4	570.327	SSRQPQSQNPKLPLSILKEK	624299456
sp|P80195|GLCM1_BOVIN"	ILNKPEDETHLEAQPTDASAQFIRNLQIS	1093.5599+++	3	1093.56	ILNKPEDETHLEAQPTDASAQFIRNLQIS	32616480
sp|P80457|XDH_BOVIN"	PTYTSATLLFQKD	742.8852++ 495.5926+++	2 3	742.885206 495.592563	PTYTSATLLFQKD	1613531040
sp|P80457|XDH_BOVIN"	PTYTSATLLFQK	685.3717++	2	685.372	PTYTSATLLFQK	79318352
sp|P80457|XDH_BOVIN"	TADELVFFVNGKKVVEKNAD	741.7267+++	3	741.727	TADELVFFVNGKKVVEKNAD	208191152
sp|P80457|XDH_BOVIN"	PPANIQLFQEVPNGQSKED	1056.0238++ 704.3516+++	2 3	1056.023825 704.351642	PPANIQLFQEVPNGQSKED	374246624
sp|P81265|PIGR_BOVIN"	PGRPTGYSGSSKAL	689.3597++ 459.9089+++	2 3	689.35969 459.908885	PGRPTGYSGSSKAL	12710360064
sp|P81265|PIGR_BOVIN"	AGEIQNKALLD	586.3195++	2	586.32	AGEIQNKALLD	175249702912
sp|P81265|PIGR_BOVIN"	PGRPTGYSGSSKALVSTLVP	658.6933+++	3	658.693	PGRPTGYSGSSKALVSTLVP	7171271680
sp|P81265|PIGR_BOVIN"	ALLDPSFFAKESVKDAAGGPGAPAD	1216.1106++ 811.0762+++	2 3	1216.110629 811.076178	ALLDPSFFAKESVKDAAGGPGAPAD	12631102208
sp|P81265|PIGR_BOVIN"	PGRPTGYSGSSKALVSTLVPLA	1079.5970++ 720.0671+++ 540.3021++++	2 3 4	1079.59696 720.067066 540.302118	PGRPTGYSGSSKALVSTLVPLA	129689572864
sp|P81265|PIGR_BOVIN"	FAKESVKDAAGGPGAPAD	844.4179++ 563.2810+++	2 3	844.417933 563.281047	FAKESVKDAAGGPGAPAD	12746456832
sp|P81265|PIGR_BOVIN"	AAGGPGAPADPGRPTGYSGSSKALVSTLVPLA	974.8488+++	3	974.849	AAGGPGAPADPGRPTGYSGSSKALVSTLVPLA	3545903616
sp|P81265|PIGR_BOVIN"	PGRPTGYSGSSKALV	492.9317+++	3	492.932	PGRPTGYSGSSKALV	613923968
sp|P81265|PIGR_BOVIN"	ALLDPSFFAKESVKD	833.9380++ 556.2944+++	2 3	833.93797 556.294405	ALLDPSFFAKESVKD	5129547456
sp|P81265|PIGR_BOVIN"	PGRPTGYSGSSKALVST	832.9338++ 555.6249+++	2 3	832.93375 555.624926	PGRPTGYSGSSKALVST	21577494272
sp|P81265|PIGR_BOVIN"	AAGGPGAPADPGRPTGYSGSSKA	1014.9903++ 676.9960+++	2 3	1014.990317 676.99597	AAGGPGAPADPGRPTGYSGSSKA	4849492272
sp|P81265|PIGR_BOVIN"	PGRPTGYSGSSKALVSTLVPLAL	757.7618+++	3	757.762	PGRPTGYSGSSKALVSTLVPLAL	1425568000
sp|P81265|PIGR_BOVIN"	AGEIQNKALLDPSFFAKESVKDAAGGPGAPAD	1057.8701+++ 793.6544++++	3 4	1057.870079 793.654378	AGEIQNKALLDPSFFAKESVKDAAGGPGAPAD	20995921408
sp|P81265|PIGR_BOVIN"	PGRPTGYSGSSKALVSTLVPL	1044.0784++ 696.3880+++ 522.5428++++	2 3 4	1044.078403 696.388028 522.54284	PGRPTGYSGSSKALVSTLVPL	76149517824
sp|P81265|PIGR_BOVIN"	PAQASHAHVYTVD	465.8932+++	3	465.893	PAQASHAHVYTVD	82139912
sp|P81265|PIGR_BOVIN"	AAGGPGAPADPGRPTGYSGSSK	653.3169+++	3	653.317	AAGGPGAPADPGRPTGYSGSSK	251217088
sp|P81265|PIGR_BOVIN"	AGEIQNKALLDPSFFAKESVKDAAGGPGAPA	1019.5278+++ 764.8976++++	3 4	1019.527764 764.897642	AGEIQNKALLDPSFFAKESVKDAAGGPGAPA	1115103680
sp|P81265|PIGR_BOVIN"	PSFFAKESVKDAAGGPGAPA	952.4811++ 635.3231+++	2 3	952.481065 635.323135	PSFFAKESVKDAAGGPGAPA	7591773824
sp|P81265|PIGR_BOVIN"	GPGAPADPGRPTGYSGSSKA	610.6307+++	3	610.631	GPGAPADPGRPTGYSGSSKA	118244816
sp|P81265|PIGR_BOVIN"	LLDPSFFAKESVKDAAGGPGAPAD	787.3971+++	3	787.397	LLDPSFFAKESVKDAAGGPGAPAD	524149600
sp|P81265|PIGR_BOVIN"	PGAPADPGRPTGYSGSSKA	591.6236+++	3	591.624	PGAPADPGRPTGYSGSSKA	74927896
sp|P81265|PIGR_BOVIN"	PSFFAKESVKDAAGGPGAPADPGRPTGYSGSSKA	1088.8688+++ 816.9035++++	3 4	1088.868849 816.903456	PSFFAKESVKDAAGGPGAPADPGRPTGYSGSSKA	2644318816
sp|P81265|PIGR_BOVIN"	AAPAGAAIQSRAGEIQNKALLD	1083.0873++ 722.3940+++	2 3	1083.087291 722.393953	AAPAGAAIQSRAGEIQNKALLD	6775019200
sp|P81265|PIGR_BOVIN"	VSLEVSQDPAQASHAHVY	646.6499+++	3	646.65	VSLEVSQDPAQASHAHVY	283411776
sp|P81265|PIGR_BOVIN"	FAKESVKDAAGGPGAPADPGRPTGYSGSSKA	978.4844+++ 734.1152++++	3 4	978.484447 734.115154	FAKESVKDAAGGPGAPADPGRPTGYSGSSKA	1887464704
sp|P81265|PIGR_BOVIN"	AAGGPGAPADPGRPTGYSGS	871.9083++	2	871.908	AAGGPGAPADPGRPTGYSGS	1187936768
sp|P81265|PIGR_BOVIN"	FFAKESVKD	357.5221+++	3	357.522	FFAKESVKD	291740800
sp|P81265|PIGR_BOVIN"	AGEIQNKALL	528.8060++	2	528.806	AGEIQNKALL	7284175872
sp|P81265|PIGR_BOVIN"	AGEIQNKALLDPSFFAKESVKD	803.0883+++ 602.5680++++	3 4	803.088306 602.568049	AGEIQNKALLDPSFFAKESVKD	4897749248
sp|P81265|PIGR_BOVIN"	SSKALVSTLVPLA	643.3899++	2	643.39	SSKALVSTLVPLA	230837456
sp|P81265|PIGR_BOVIN"	LDPSFFAKESVKDAAGGPGAPAD	1124.0500++ 749.7025+++	2 3	1124.05004 749.702452	LDPSFFAKESVKDAAGGPGAPAD	1195259584
sp|P81265|PIGR_BOVIN"	PSFFAKESVKDAAGGPGAPADPGRPTGYSGS	745.3624++++	4	745.362	PSFFAKESVKDAAGGPGAPADPGRPTGYSGS	1077363328
sp|P81265|PIGR_BOVIN"	PSFFAKESVKDAAG	727.3697++	2	727.37	PSFFAKESVKDAAG	88392920
sp|P81265|PIGR_BOVIN"	AAGGPGAPADPGRPTGY	756.3655++	2	756.366	AAGGPGAPADPGRPTGY	361245376
sp|P81265|PIGR_BOVIN"	PGRPTGYSGSSKALVS	782.4099++ 521.9424+++	2 3	782.409911 521.942366	PGRPTGYSGSSKALVS	1380233432
sp|P81265|PIGR_BOVIN"	AKESVKDAAGGPGAPAD	770.8837++ 514.2582+++	2 3	770.883726 514.258243	AKESVKDAAGGPGAPAD	596879088
sp|P81265|PIGR_BOVIN"	PSFFAKESVKD	627.8219++ 418.8837+++	2 3	627.821878 418.883677	PSFFAKESVKD	2685308672
sp|P81265|PIGR_BOVIN"	FAKESVKDAAGGPGAPA	786.9045++	2	786.904	FAKESVKDAAGGPGAPA	114243400
sp|P81265|PIGR_BOVIN"	AAGGPGAPADPGRPTGYSGSS	915.4243++	2	915.424	AAGGPGAPADPGRPTGYSGSS	237675968
sp|P81265|PIGR_BOVIN"	ESVKDAAGGPGAPAD	671.3177++	2	671.318	ESVKDAAGGPGAPAD	37522640
sp|P81265|PIGR_BOVIN"	SFFAKESVKDAAGGPGAPAD	961.4682++	2	961.468	SFFAKESVKDAAGGPGAPAD	113189120
sp|P81265|PIGR_BOVIN"	RPTGYSGSSKALVSTLVPL	645.0300+++	3	645.03	RPTGYSGSSKALVSTLVPL	86801808
sp|P81265|PIGR_BOVIN"	PGRPTGYSGSSKALVSTLVPLALV	790.7846+++	3	790.785	PGRPTGYSGSSKALVSTLVPLALV	140247024
sp|P81265|PIGR_BOVIN"	KALLDPSFFAKESVKDAAGGPGAPAD	853.7745+++	3	853.774	KALLDPSFFAKESVKDAAGGPGAPAD	28956722
sp|P81265|PIGR_BOVIN"	AAGGPGAPADPGRPTGYSGSSKAL	714.6907+++	3	714.691	AAGGPGAPADPGRPTGYSGSSKAL	1230198528
sp|P81265|PIGR_BOVIN"	AAGGPGAPADPGRPTGYSG	828.3922++	2	828.392	AAGGPGAPADPGRPTGYSG	164936032
sp|P81265|PIGR_BOVIN"	PSFFAKESVKDAAGGPGAPAD	1009.9945++ 673.6654+++ 505.5009++++	2 3 4	1009.994536 673.66545 505.500906	PSFFAKESVKDAAGGPGAPAD	121314197392
sp|P81265|PIGR_BOVIN"	PSFFAKESVKDAAGGPGAPADPGRPT	843.0907+++	3	843.091	PSFFAKESVKDAAGGPGAPADPGRPT	236704928
sp|P81265|PIGR_BOVIN"	GGPGAPADPGRPTGYSGSSKA	629.6379+++	3	629.638	GGPGAPADPGRPTGYSGSSKA	42728192
sp|P81265|PIGR_BOVIN"	PGRPTGYSGSSKA	422.2142+++	3	422.214	PGRPTGYSGSSKA	27338458
sp|P81265|PIGR_BOVIN"	PSFFAKESVKDAAGGPG	832.9176++	2	832.918	PSFFAKESVKDAAGGPG	114525456
sp|P81265|PIGR_BOVIN"	PSFFAKESVK	570.3084++ 380.5414+++	2 3	570.308406 380.541363	PSFFAKESVK	1191902176
sp|P81265|PIGR_BOVIN"	FFAKESVKDAAGGPGAPADPGRPTGYSGSSKA	1027.5073+++ 770.8823++++	3 4	1027.507252 770.882258	FFAKESVKDAAGGPGAPADPGRPTGYSGSSKA	467261264
sp|P81265|PIGR_BOVIN"	RPTGYSGSSKALVSTLVPLA	668.7090+++	3	668.709	RPTGYSGSSKALVSTLVPLA	135076368
sp|P81265|PIGR_BOVIN"	FFAKESVKDAAGGPGAPAD	917.9521++ 612.3039+++	2 3	917.95214 612.303852	FFAKESVKDAAGGPGAPAD	1564833344
sp|P81265|PIGR_BOVIN"	AAPAGAAIQSRAGEIQNKALL	684.0516+++	3	684.052	AAPAGAAIQSRAGEIQNKALL	196591248
sp|P81265|PIGR_BOVIN"	ALLDPSFFAKESVK	776.4245++	2	776.424	ALLDPSFFAKESVK	56210840
sp|P81265|PIGR_BOVIN"	ALLDPSFFAKESVKDAAGGPGAPADPGRPTGYSGS	848.4205++++	4	848.42	ALLDPSFFAKESVKDAAGGPGAPADPGRPTGYSGS	165253584
sp|P81265|PIGR_BOVIN"	PSFFAKESVKDAAGGPGAPADPGRPTGYSGSSKAL	1126.5635+++ 845.1745++++	3 4	1126.563537 845.174472	PSFFAKESVKDAAGGPGAPADPGRPTGYSGSSKAL	502287552
sp|P81265|PIGR_BOVIN"	PSFFAKESVKDAA	466.2418+++	3	466.242	PSFFAKESVKDAA	149014480
sp|P81265|PIGR_BOVIN"	PSFFAKESVKDAAGG	755.8805++	2	755.88	PSFFAKESVKDAAGG	202505408
sp|P81265|PIGR_BOVIN"	IQSRAGEIQNKALLD	552.6407+++	3	552.641	IQSRAGEIQNKALLD	184949440
sp|P81265|PIGR_BOVIN"	IQSRAGEIQNKALLDPSFFAKESVKDAAGGPGAPAD	914.7233++++	4	914.723	IQSRAGEIQNKALLDPSFFAKESVKDAAGGPGAPAD	18604484
sp|P81265|PIGR_BOVIN"	PSFFAKESVKDA	442.5627+++	3	442.563	PSFFAKESVKDA	81789320
sp|P81265|PIGR_BOVIN"	SGSSKALVSTLVPL	679.8981++	2	679.898	SGSSKALVSTLVPL	25024990
sp|P81265|PIGR_BOVIN"	ALLDPSFFAKESVKDAAG	622.6596+++	3	622.66	ALLDPSFFAKESVKDAAG	36003860
sp|P81265|PIGR_BOVIN"	SKALVSTLVPLA	599.8739++	2	599.874	SKALVSTLVPLA	42922008
sp|P81265|PIGR_BOVIN"	FAKESVKDAAGGPGAPADPGRPTGYSGSSKALVSTLVPLA	957.5048++++	4	957.505	FAKESVKDAAGGPGAPADPGRPTGYSGSSKALVSTLVPLA	86259352
sp|P81265|PIGR_BOVIN"	YSGSSKALVSTLVPLA	796.9483++	2	796.948	YSGSSKALVSTLVPLA	99733672
sp|P81265|PIGR_BOVIN"	AGEIQNKALLDPSFFAKESVKDAAG	869.4535+++	3	869.454	AGEIQNKALLDPSFFAKESVKDAAG	58313188
sp|P81265|PIGR_BOVIN"	AGEIQNKALLDPSF	751.8961++	2	751.896	AGEIQNKALLDPSF	107707832
sp|P81265|PIGR_BOVIN"	ALLDPSFFAKESVKDAAGGPGAPA	772.7339+++	3	772.734	ALLDPSFFAKESVKDAAGGPGAPA	1851956992
sp|P81265|PIGR_BOVIN"	AKESVKDAAGGPGAPADPGRPT	683.6835+++	3	683.684	AKESVKDAAGGPGAPADPGRPT	4413919
sp|P81265|PIGR_BOVIN"	ALLDPSFFAKESVKDAAGGPGAPADPGRPTGYSGSS	870.1785++++	4	870.178	ALLDPSFFAKESVKDAAGGPGAPADPGRPTGYSGSS	33581292
sp|Q3ZCH5|ZA2G_BOVIN"	GQDFIKFDKEIPAWVPLD	706.7017+++	3	706.702	GQDFIKFDKEIPAWVPLD	301875648
sp|Q3ZCH5|ZA2G_BOVIN"	KEIPAWVPLD	584.3241++	2	584.324	KEIPAWVPLD	803128704
sp|Q3ZCH5|ZA2G_BOVIN"	FIKFDKEIPAWVPLD	606.6661+++	3	606.666	FIKFDKEIPAWVPLD	52469536
sp|Q865B7|PRGC1_BOVIN"	ILVSTSQELHD	621.3222++	2	621.322	ILVSTSQELHD	943770880
sp|Q8MI01|MUC15_BOVIN"	SIPMDDIPPLR	627.3316++	2	627.332	SIPMDDIPPLR	94116528
sp|Q8MI01|MUC15_BOVIN"	SSTSAGGENAHDSIPMDDIPPLR	789.7009+++	3	789.701	SSTSAGGENAHDSIPMDDIPPLR	70456048
sp|Q8MI01|MUC15_BOVIN"	IPPLRTSV	441.7740++	2	441.774	IPPLRTSV	662511808
sp|Q9MZ06|FGFP1_BOVIN"	GSKASADESLALGKPGKEPR	666.6920+++ 500.2708++++	3 4	666.691999 500.270818	GSKASADESLALGKPGKEPR	3957313344
sp|Q9MZ06|FGFP1_BOVIN"	PQCEEEDLKNQR	496.8964+++	3	496.896	PQCEEEDLKNQR	54121724
sp|Q9MZ06|FGFP1_BOVIN"	RGSKASADESLALGKPGKEPR	539.2961++++	4	539.296	RGSKASADESLALGKPGKEPR	927756544
sp|Q9MZ06|FGFP1_BOVIN"	NRRGSKASADESLALGKPGKEP	567.8068++++	4	567.807	NRRGSKASADESLALGKPGKEP	66419772
sp|Q9MZ06|FGFP1_BOVIN"	ASADESLALGKPGKEPR	432.2337++++	4	432.234	ASADESLALGKPGKEPR	568474688
sp|Q9MZ06|FGFP1_BOVIN"	SQPTNYPIKGKFVTPD	597.9807+++	3	597.981	SQPTNYPIKGKFVTPD	556383616
sp|Q9MZ06|FGFP1_BOVIN"	SQPTNYPIKGKFVTPDHAD	705.6884+++ 529.5181++++	3 4	705.688366 529.518093	SQPTNYPIKGKFVTPDHAD	1286461248
sp|Q9MZ06|FGFP1_BOVIN"	RGSKASADESLALGKPGKEP	666.6920+++ 500.2708++++	3 4	666.691999 500.270818	RGSKASADESLALGKPGKEP	497307664
sp|Q9TUM6|PLIN2_BOVIN" tr|A1L5C2|A1L5C2_BOVIN"	VEEAKRKGQETISQLH	618.3340+++ 464.0023++++	3 4	618.334034 464.002345	VEEAKRKGQETISQLH	493812000
sp|Q9TUM6|PLIN2_BOVIN" tr|A1L5C2|A1L5C2_BOVIN"	RVEEAKRKGQETISQLH	503.0276++++	4	503.028	RVEEAKRKGQETISQLH	346445760
sp|Q9TUM6|PLIN2_BOVIN" tr|A1L5C2|A1L5C2_BOVIN"	RTKGAVTGSVEKTKSVVSG	631.0251+++ 473.5206++++	3 4	631.025089 473.520636	RTKGAVTGSVEKTKSVVSG	270661040
sp|Q9TUM6|PLIN2_BOVIN" tr|A1L5C2|A1L5C2_BOVIN"	LPLTKDELEKEAKKVEGFDMVQKPSY	756.4006++++	4	756.401	LPLTKDELEKEAKKVEGFDMVQKPSY	45900584
sp|Q9TUM6|PLIN2_BOVIN" tr|A1L5C2|A1L5C2_BOVIN"	EEAKRKGQETISQLH	585.3112+++ 439.2352++++	3 4	585.31123 439.235241	EEAKRKGQETISQLH	167760760
sp|Q9TUM6|PLIN2_BOVIN" tr|A1L5C2|A1L5C2_BOVIN"	GRWSRKHPKPVPVSNAEGSQPDDSSS	722.0886++++	4	722.089	GRWS[+80]RKHPKPVPVSNAEGSQPDDSSS	40954484
sp|Q9TUM6|PLIN2_BOVIN" tr|A1L5C2|A1L5C2_BOVIN"	RWSRKHPKPVPVSNAEGSQPDDSSS	707.8332++++	4	707.833	RWS[+80]RKHPKPVPVSNAEGSQPDDSSS	49168844
sp|Q9TUM6|PLIN2_BOVIN" tr|A1L5C2|A1L5C2_BOVIN"	LPIIQKLEPQIA	681.9214++	2	681.921	LPIIQKLEPQIA	19601884
tr|A5D9G1|A5D9G1_BOVIN"	AKKFVVYEVLREDEFSPLKNADSQNGKDNPTTARHALMSLHHC	1228.8619++++	4	1228.86	AKKFVVYEVLREDEFSPLKNADSQNGKDNPTTARHALM[+16]SLHHC	1154022144
tr|B5B3R8|B5B3R8_BOVIN"	IPNPIGSENSGKTTMPLW	971.4906++ 647.9961+++	2 3	971.490575 647.996142	IPNPIGSENSGKTTMPLW	326955744
tr|B5B3R8|B5B3R8_BOVIN"	DIPNPIGSENSGKTTMPLW	1029.0040++	2	1029	DIPNPIGSENSGKTTMPLW	26118500
tr|B5B3R8|B5B3R8_BOVIN"	APSFSDIPNPIGSENSGKTTMPLW	1273.6152++ 849.4126+++	2 3	1273.615221 849.412573	APSFSDIPNPIGSENSGKTTMPLW	490968608
tr|B5B3R8|B5B3R8_BOVIN"	SDIPNPIGSENSGKTTMPLW	1072.5201++	2	1072.52	SDIPNPIGSENSGKTTMPLW	309219968
tr|B5B3R8|B5B3R8_BOVIN"	SDIPNPIGSENSGKTTMPLW	1080.5175++	2	1080.52	SDIPNPIGSENSGKTTM[+16]PLW	57044272
tr|E1BCP6|E1BCP6_BOVIN"	LLVFRTNGISD	617.8431++	2	617.843	LLVFRTNGISD	4787352576
tr|F1MDE1|F1MDE1_BOVIN"	SPDIILPIHS	546.3084++	2	546.308	SPDIILPIHS	6985298944
tr|Q0IIA2|Q0IIA2_BOVIN"	PSKVVGEWRTIYAAAD	881.9598++ 588.3089+++	2 3	881.959768 588.308937	PSKVVGEWRTIYAAAD	251393840
tr|Q3ZCL0|Q3ZCL0_BOVIN"	NVQTEIVNKHND	470.9039+++	3	470.904	NVQTEIVNKHND	51367972
tr|Q3ZCL0|Q3ZCL0_BOVIN"	LSNTLKNVQTEIVNKHND	689.6992+++	3	689.699	LSNTLKNVQTEIVNKHND	137057024
tr|Q56J78|Q56J78_BOVIN"	GMTRDQVREDSKADQAANEWGRSGKD	731.5891++++	4	731.589	GM[+16]TRDQVREDSKADQAANEWGRSGKD	726636224
tr|Q56J78|Q56J78_BOVIN"	GMTRDQVREDSKADQAANEWGRSGKD	727.5904++++	4	727.59	GMTRDQVREDSKADQAANEWGRSGKD	4017201664
tr|Q56J78|Q56J78_BOVIN"	SKADQAANEWGRSGKD	860.4059++ 573.9397+++ 430.7066++++	2 3 4	860.405888 573.939684 430.706582	SKADQAANEWGRSGKD	3605258600
tr|Q56J78|Q56J78_BOVIN"	SKADQAANEWGRSGK	535.5974+++ 401.9498++++	3 4	535.59737 401.949846	SKADQAANEWGRSGK	131010114
tr|Q56J78|Q56J78_BOVIN"	PNHFRPAGLPNKY	755.8993++ 504.2686+++ 378.4533++++	2 3 4	755.899317 504.268636 378.453296	PNHFRPAGLPNKY	31072270592
tr|Q56J78|Q56J78_BOVIN"	QVREDSKADQAANEWGRSGKD	783.0389+++ 587.5310++++	3 4	783.038897 587.530992	QVREDSKADQAANEWGRSGKD	399148736
tr|Q56J78|Q56J78_BOVIN"	SKADQAANEWGRSGKDPNH	517.7452++++	4	517.745	SKADQAANEWGRSGKDPNH	53619896
tr|Q56J78|Q56J78_BOVIN"	DQVREDSKADQAANEWGRSGKD	821.3812+++ 616.2877++++	3 4	821.381212 616.287728	DQVREDSKADQAANEWGRSGKD	459618504
tr|Q56J78|Q56J78_BOVIN"	GMTRDQVREDSKADQAANEWGRSGK	698.8337++++	4	698.834	GMTRDQVREDSKADQAANEWGRSGK	114324496
tr|Q56J78|Q56J78_BOVIN"	REDSKADQAANEWGRSGKD	530.7492++++	4	530.749	REDSKADQAANEWGRSGKD	119089688
tr|Q56J78|Q56J78_BOVIN"	HFRPAGLPNKY	433.9034+++	3	433.903	HFRPAGLPNKY	186989472
tr|Q56J78|Q56J78_BOVIN"	PLFKGMTRDQVREDSKADQAANEWGRSGKD	852.9142++++	4	852.914	PLFKGM[+16]TRDQVREDSKADQAANEWGRSGKD	160808544
tr|Q56J78|Q56J78_BOVIN"	RDQVREDSKADQAANEWGRSGKD	655.3130++++	4	655.313	RDQVREDSKADQAANEWGRSGKD	27021442
tr|Q56J78|Q56J78_BOVIN"	SKADQAANEWGRSGKDPN	644.3049+++ 483.4805++++	3 4	644.304915 483.480505	SKADQAANEWGRSGKDPN	223876072
tr|Q56J78|Q56J78_BOVIN"	AAQRGPGGAWAAKVISN	551.9655+++	3	551.966	AAQRGPGGAWAAKVISN	227481264
tr|Q56J78|Q56J78_BOVIN"	SKADQAANEWGR	666.8182++ 444.8812+++	2 3	666.818189 444.881218	SKADQAANEWGR	81501148
tr|Q56J78|Q56J78_BOVIN"	GMTRDQVREDSKADQAANE	707.6590+++	3	707.659	GMTRDQVREDSKADQAANE	28942090
tr|Q56J78|Q56J78_BOVIN"	PLFKGMTRDQVREDSKADQAANEWGR	752.1216++++	4	752.122	PLFKGMTRDQVREDSKADQAANEWGR	264267872
tr|Q56J78|Q56J78_BOVIN"	GMTRDQVREDSKADQAANEWGR	840.7263+++ 630.7966++++	3 4	840.726325 630.796563	GMTRDQVREDSKADQAANEWGR	436840368
tr|Q56J78|Q56J78_BOVIN"	SGKDPNHFRPAGLPNKY	475.2471++++	4	475.247	SGKDPNHFRPAGLPNKY	13490143
tr|Q56J78|Q56J78_BOVIN" tr|Q8SQ28|Q8SQ28_BOVIN" tr|Q9MZT5|Q9MZT5_BOVIN" tr|B8Y7I4|B8Y7I4_BOVIN"	ARETIQGITD	552.2882++	2	552.288	ARETIQGITD	36523081728
tr|Q56J78|Q56J78_BOVIN" tr|Q8SQ28|Q8SQ28_BOVIN" tr|Q9MZT5|Q9MZT5_BOVIN" tr|B8Y7I4|B8Y7I4_BOVIN"	VISNARETIQGITD	758.9019++	2	758.902	VISNARETIQGITD	4560907264
tr|Q56J78|Q56J78_BOVIN" tr|Q8SQ28|Q8SQ28_BOVIN" tr|Q9MZT5|Q9MZT5_BOVIN" tr|B8Y7I4|B8Y7I4_BOVIN"	ARETIQGITDPLFKGMTRDQVRED	694.8566++++	4	694.857	ARETIQGITDPLFKGMTRDQVRED	416355808
tr|Q56J78|Q56J78_BOVIN" tr|Q8SQ28|Q8SQ28_BOVIN" tr|Q9MZT5|Q9MZT5_BOVIN" tr|B8Y7I4|B8Y7I4_BOVIN"	GMTRDQVREDSKAD	536.5863+++	3	536.586	GMTRDQVREDSKAD	92487704
tr|Q56J78|Q56J78_BOVIN" tr|Q8SQ28|Q8SQ28_BOVIN" tr|Q9MZT5|Q9MZT5_BOVIN" tr|B8Y7I4|B8Y7I4_BOVIN"	PLFKGMTRDQVRED	427.7175++++	4	427.718	PLFKGM[+16]TRDQVRED	308511072
tr|Q56J78|Q56J78_BOVIN" tr|Q8SQ28|Q8SQ28_BOVIN" tr|Q9MZT5|Q9MZT5_BOVIN" tr|B8Y7I4|B8Y7I4_BOVIN"	GADKYFHARGNYD	505.2321+++	3	505.232	GADKYFHARGNYD	273090048
tr|Q56J78|Q56J78_BOVIN" tr|Q8SQ28|Q8SQ28_BOVIN" tr|Q9MZT5|Q9MZT5_BOVIN" tr|B8Y7I4|B8Y7I4_BOVIN"	KVISNARETIQGITD	822.9494++ 548.9687+++	2 3	822.9494 548.968692	KVISNARETIQGITD	2866255616
tr|Q56J78|Q56J78_BOVIN" tr|Q8SQ28|Q8SQ28_BOVIN" tr|Q9MZT5|Q9MZT5_BOVIN" tr|B8Y7I4|B8Y7I4_BOVIN"	ISNARETIQGITD	709.3677++	2	709.368	ISNARETIQGITD	263877616
tr|Q56J78|Q56J78_BOVIN" tr|Q8SQ28|Q8SQ28_BOVIN" tr|Q9MZT5|Q9MZT5_BOVIN" tr|B8Y7I4|B8Y7I4_BOVIN"	ARETIQGITDPLF	730.8908++	2	730.891	ARETIQGITDPLF	83422552
tr|Q56J78|Q56J78_BOVIN" tr|Q8SQ28|Q8SQ28_BOVIN" tr|Q9MZT5|Q9MZT5_BOVIN" tr|B8Y7I4|B8Y7I4_BOVIN"	ARETIQGITDPLFKGMTRD	717.0405+++ 538.0322++++	3 4	717.040522 538.03221	ARETIQGITDPLFKGMTRD	659851232
tr|Q56J78|Q56J78_BOVIN" tr|Q8SQ28|Q8SQ28_BOVIN" tr|Q9MZT5|Q9MZT5_BOVIN" tr|B8Y7I4|B8Y7I4_BOVIN"	PLFKGMTRDQVRED	423.7188++++	4	423.719	PLFKGMTRDQVRED	46406688
tr|Q56J78|Q56J78_BOVIN" tr|Q8SQ28|Q8SQ28_BOVIN" tr|Q9MZT5|Q9MZT5_BOVIN" tr|B8Y7I4|B8Y7I4_BOVIN"	PLFKGMTRD	532.7815++ 355.5234+++	2 3	532.781501 355.523426	PLFKGMTRD	2848014496
tr|Q56J78|Q56J78_BOVIN" tr|Q8SQ28|Q8SQ28_BOVIN" tr|Q9MZT5|Q9MZT5_BOVIN" tr|B8Y7I4|B8Y7I4_BOVIN"	VISNARETIQGIT	701.3884++	2	701.388	VISNARETIQGIT	88834936
tr|Q56J78|Q56J78_BOVIN" tr|Q8SQ28|Q8SQ28_BOVIN" tr|Q9MZT5|Q9MZT5_BOVIN" tr|B8Y7I4|B8Y7I4_BOVIN"	PLFKGMTRDQVRE	526.2803+++	3	526.28	PLFKGMTRDQVRE	151078912
tr|Q56J78|Q56J78_BOVIN" tr|Q8SQ28|Q8SQ28_BOVIN" tr|Q9MZT5|Q9MZT5_BOVIN" tr|B8Y7I4|B8Y7I4_BOVIN"	PLFKGMTRDQVREDSKAD	698.3530+++	3	698.353	PLFKGMTRDQVREDSKAD	368863488
tr|Q7JAT1|Q7JAT1_BOVIN" tr|G8FZ88|G8FZ88_BOVIN"	LLPHSFTPT	506.7767++	2	506.777	LLPHSFTPT	1435552256
tr|Q8MKB7|Q8MKB7_BOVIN"	LIGVSRMIT	495.2942++	2	495.294	LIGVSRMIT	16656640000
tr|Q8SQ28|Q8SQ28_BOVIN"	PNHFRPAGLPDKY	756.3913++ 504.5966+++ 378.6993++++	2 3 4	756.391324 504.596642 378.6993	PNHFRPAGLPDKY	42361227264
tr|Q8SQ28|Q8SQ28_BOVIN" tr|Q9MZT5|Q9MZT5_BOVIN" tr|B8Y7I4|B8Y7I4_BOVIN"	SKADQFANEWGRSGKD	898.4215++ 599.2835+++	2 3	898.421538 599.283451	SKADQFANEWGRSGKD	3745267712
tr|Q8SQ28|Q8SQ28_BOVIN" tr|Q9MZT5|Q9MZT5_BOVIN" tr|B8Y7I4|B8Y7I4_BOVIN"	GMTRDQVREDSKADQFANEWGRSGKD	746.5982++++	4	746.598	GMTRDQVREDSKADQFANEWGRSGKD	2050229376
tr|Q8SQ28|Q8SQ28_BOVIN" tr|Q9MZT5|Q9MZT5_BOVIN" tr|B8Y7I4|B8Y7I4_BOVIN"	SKADQFANEWGR	470.2250+++	3	470.225	SKADQFANEWGR	158533120
tr|Q8SQ28|Q8SQ28_BOVIN" tr|Q9MZT5|Q9MZT5_BOVIN" tr|B8Y7I4|B8Y7I4_BOVIN"	GMTRDQVREDSKADQFANEWGR	649.8044++++	4	649.804	GMTRDQVREDSKADQFANEWGR	162114400
tr|Q8SQ28|Q8SQ28_BOVIN" tr|Q9MZT5|Q9MZT5_BOVIN" tr|B8Y7I4|B8Y7I4_BOVIN"	GMTRDQVREDSKADQFANEWGRSGKD	750.5970++++	4	750.597	GM[+16]TRDQVREDSKADQFANEWGRSGKD	86392496
tr|Q95394|Q95394_BOVIN"	PPKAHVTHHPISER	402.2207++++	4	402.221	PPKAHVTHHPISER	52170292
tr|Q95394|Q95394_BOVIN"	PPKAHVTHHPISE	483.9248+++	3	483.925	PPKAHVTHHPISE	70430352
tr|Q9BDG3|Q9BDG3_BOVIN"	AQSAPLRVYVEQ	680.8646++	2	680.865	AQSAPLRVYVEQ	805297152
tr|Q9BDG3|Q9BDG3_BOVIN"	AQSAPLRVYVEQLKPTPEGD	550.2918++++	4	550.292	AQSAPLRVYVEQLKPTPEGD	87097984
tr|Q9BEG3|Q9BEG3_BOVIN"	LLYKNLAN	474.7793++	2	474.779	LLYKNLAN	275452608
tr|Q9TS73|Q9TS73_BOVIN"	LPENVVVKD	506.7873++	2	506.787	LPENVVVKD	788328896
tr|Q9TS74|Q9TS74_BOVIN"	LPENVTPEEQHKGTSVD	940.4552++ 627.3059+++	2 3	940.455244 627.305921	LPENVTPEEQHKGTSVD	1209150848
					Total Area

## Sheet: W NP ND
Protein	Peptide	Precursor	Precursor Charge	Precursor Mz	Peptide Modified Sequence	B3 Total Area
sp|A0JNP2|SG1D_BOVIN"	VKAVLNPSSA	493.2875++	2	493.287	VKAVLNPSSA	3023247104
sp|P00711|LALBA_BOVIN" tr|G9G9X6|G9G9X6_BOVIN"	EQLTKCEVFR	626.8214++ 418.2167+++	2 3	626.821355 418.216662	EQLTKCEVFR	1308195168
sp|P00711|LALBA_BOVIN" tr|G9G9X6|G9G9X6_BOVIN"	EQLTKCEVFRE	691.3427++ 461.2309+++	2 3	691.342651 461.23086	EQLTKCEVFRE	554078704
sp|P00711|LALBA_BOVIN" tr|G9G9X6|G9G9X6_BOVIN"	EQLTKCEVFRELK	406.4697++++	4	406.47	EQLTKCEVFRELK	137061408
sp|P00711|LALBA_BOVIN" tr|G9G9X6|G9G9X6_BOVIN"	EQLTKCEVFRELKD	869.4456++ 579.9662+++ 435.2265++++	2 3 4	869.445636 579.966183 435.226456	EQLTKCEVFRELKD	2676826880
sp|P00711|LALBA_BOVIN" tr|G9G9X6|G9G9X6_BOVIN"	HTSGYDTQAIVQNND	831.8713++	2	831.871	HTSGYDTQAIVQNND	204308912
sp|P00711|LALBA_BOVIN" tr|G9G9X6|G9G9X6_BOVIN"	IVQNNDSTEYGL	676.8201++	2	676.82	IVQNNDSTEYGL	137561936
sp|P00711|LALBA_BOVIN" tr|G9G9X6|G9G9X6_BOVIN"	KFLDDDLTD	541.2560++	2	541.256	KFLDDDLTD	3847752448
sp|P00711|LALBA_BOVIN" tr|G9G9X6|G9G9X6_BOVIN"	KLDQWLCEKL	425.8970+++	3	425.897	KLDQWLCEKL	67816200
sp|P00711|LALBA_BOVIN" tr|G9G9X6|G9G9X6_BOVIN"	QWLCEKL	460.2389++	2	460.239	QWLCEKL	2237560832
sp|P00711|LALBA_BOVIN" tr|G9G9X6|G9G9X6_BOVIN"	SEKLDQWLCEKL	746.3792++ 497.9219+++	2 3	746.379234 497.921915	SEKLDQWLCEKL	221267536
sp|P00711|LALBA_BOVIN" tr|G9G9X6|G9G9X6_BOVIN"	SGYDTQAIVQNND	712.8181++	2	712.818	SGYDTQAIVQNND	99858552
sp|P00711|LALBA_BOVIN" tr|G9G9X6|G9G9X6_BOVIN"	TQAIVQNND	501.7462++	2	501.746	TQAIVQNND	24346181632
sp|P00711|LALBA_BOVIN" tr|G9G9X6|G9G9X6_BOVIN"	TQAIVQNNDST	595.7860++	2	595.786	TQAIVQNNDST	124184416
sp|P00711|LALBA_BOVIN" tr|G9G9X6|G9G9X6_BOVIN"	TQAIVQNNDSTE	660.3073++	2	660.307	TQAIVQNNDSTE	122515944
sp|P00711|LALBA_BOVIN" tr|G9G9X6|G9G9X6_BOVIN"	TQAIVQNNDSTEY	741.8390++	2	741.839	TQAIVQNNDSTEY	456171104
sp|P00711|LALBA_BOVIN" tr|G9G9X6|G9G9X6_BOVIN"	TTFHTSGYD	514.7196++	2	514.72	TTFHTSGYD	499762880
sp|P00711|LALBA_BOVIN" tr|G9G9X6|G9G9X6_BOVIN"	TTFHTSGYDTQAIVQNND	1006.4532++	2	1006.45	TTFHTSGYDTQAIVQNND	135609904
sp|P00711|LALBA_BOVIN" tr|G9G9X6|G9G9X6_BOVIN" tr|Q9TRC0|Q9TRC0_BOVIN"	RELKDLKGY	561.3193++ 374.5486+++	2 3	561.319305 374.548629	RELKDLKGY	2434603232
sp|P02662|CASA1_BOVIN"	APSFSDIPNPIGSENSEK	944.9498++	2	944.95	APSFSDIPNPIGSENSEK	186609648
sp|P02662|CASA1_BOVIN"	APSFSDIPNPIGSENSEKTTMP	779.0301+++	3	779.03	APSFSDIPNPIGSENSEKTTM[+16]P	5909754
sp|P02662|CASA1_BOVIN"	APSFSDIPNPIGSENSEKTTMPLW	1317.6232++ 878.7513+++	2 3	1317.623243 878.751254	APSFSDIPNPIGSENSEKTTM[+16]PLW	1007391520
sp|P02662|CASA1_BOVIN"	APSFSDIPNPIGSENSEKTTMP	1160.0441++ 773.6985+++	2 3	1160.044097 773.69849	APSFSDIPNPIGSENSEKTTMP	346958656
sp|P02662|CASA1_BOVIN"	APSFSDIPNPIGSENSEKTTMPL	1216.5861++ 811.3932+++	2 3	1216.586129 811.393178	APSFSDIPNPIGSENSEKTTMPL	111358336
sp|P02662|CASA1_BOVIN"	APSFSDIPNPIGSENSEKTTMPLW	1309.6258++ 873.4196+++	2 3	1309.625786 873.419616	APSFSDIPNPIGSENSEKTTMPLW	833355376
sp|P02662|CASA1_BOVIN"	DAPSFSDIPNPIGSENSEKTTMPLW	911.7619+++	3	911.762	DAPSFSDIPNPIGSENSEKTTMPLW	27937304
sp|P02662|CASA1_BOVIN"	DIPNPIGSENSEKTTMPLW	1073.0121++	2	1073.01	DIPNPIGSENSEKTTM[+16]PLW	368337728
sp|P02662|CASA1_BOVIN"	DIPNPIGSENSEKTTMPLW	1065.0146++	2	1065.01	DIPNPIGSENSEKTTMPLW	249715152
sp|P02662|CASA1_BOVIN"	EDVPSERY	497.7274++	2	497.727	EDVPSERY	1195930752
sp|P02662|CASA1_BOVIN"	EDVPSERYLG	582.7802++	2	582.78	EDVPSERYLG	304693568
sp|P02662|CASA1_BOVIN"	EDVPSERYLGYL	720.8539++	2	720.854	EDVPSERYLGYL	83760488
sp|P02662|CASA1_BOVIN"	EDVPSERYLGYLE	785.3752++	2	785.375	EDVPSERYLGYLE	139505248
sp|P02662|CASA1_BOVIN"	EDVPSERYLGYLEQL	905.9465++ 604.3001+++	2 3	905.946523 604.300108	EDVPSERYLGYLEQL	249897568
sp|P02662|CASA1_BOVIN"	EQKHIQKEDVPSER	574.9638+++	3	574.964	EQKHIQKEDVPSER	43106712
sp|P02662|CASA1_BOVIN"	FSDIPNPIGSENSEKTTMP	1032.4831++	2	1032.48	FSDIPNPIGSENSEKTTMP	81453472
sp|P02662|CASA1_BOVIN"	HIQKEDVPS	526.7722++ 351.5172+++	2 3	526.772188 351.517217	HIQKEDVPS	5912092672
sp|P02662|CASA1_BOVIN"	HIQKEDVPSE	591.2935++	2	591.293	HIQKEDVPSE	2566910464
sp|P02662|CASA1_BOVIN"	HIQKEDVPSER	669.3440++ 446.5651+++	2 3	669.34404 446.565119	HIQKEDVPSER	31296966912
sp|P02662|CASA1_BOVIN"	HIQKEDVPSERY	750.8757++ 500.9196+++ 375.9415++++	2 3 4	750.875704 500.919561 375.94149	HIQKEDVPSERY	7343461560
sp|P02662|CASA1_BOVIN"	HIQKEDVPSERYL	807.4177++ 538.6142+++	2 3	807.417736 538.614249	HIQKEDVPSERYL	3456476288
sp|P02662|CASA1_BOVIN"	HIQKEDVPSERYLG	835.9285++ 557.6214+++ 418.4679++++	2 3 4	835.928468 557.621404 418.467872	HIQKEDVPSERYLG	19906594048
sp|P02662|CASA1_BOVIN"	HIQKEDVPSERYLGY	917.4601++ 611.9758+++	2 3	917.460132 611.975847	HIQKEDVPSERYLGY	3438825216
sp|P02662|CASA1_BOVIN"	HIQKEDVPSERYLGYL	974.0022++ 487.5047++++	2 4	974.002164 487.50472	HIQKEDVPSERYLGYL	1410582624
sp|P02662|CASA1_BOVIN"	HIQKEDVPSERYLGYLE	1038.5235++ 692.6847+++ 519.7654++++	2 3 4	1038.523461 692.684733 519.765368	HIQKEDVPSERYLGYLE	12932760064
sp|P02662|CASA1_BOVIN"	HIQKEDVPSERYLGYLEQ	1102.5527++ 735.3709+++ 551.7800++++	2 3 4	1102.55275 735.370925 551.780013	HIQKEDVPSERYLGYLEQ	5632326848
sp|P02662|CASA1_BOVIN"	HIQKEDVPSERYLGYLEQL	1159.0948++ 773.0656+++ 580.0510++++	2 3 4	1159.094782 773.065613 580.051029	HIQKEDVPSERYLGYLEQL	14108189632
sp|P02662|CASA1_BOVIN"	IGSENSEKTTMP	655.3006++	2	655.301	IGSENSEKTTM[+16]P	49321512
sp|P02662|CASA1_BOVIN"	IPNPIGSENSEKTTMP	865.9169++	2	865.917	IPNPIGSENSEKTTM[+16]P	280793216
sp|P02662|CASA1_BOVIN"	IPNPIGSENSEKTTMP	857.9195++	2	857.919	IPNPIGSENSEKTTMP	366727840
sp|P02662|CASA1_BOVIN"	IPNPIGSENSEKTTMPL	914.4615++	2	914.461	IPNPIGSENSEKTTMPL	149476000
sp|P02662|CASA1_BOVIN"	IPNPIGSENSEKTTMPLW	1007.5011++ 672.0032+++	2 3	1007.50114 672.003185	IPNPIGSENSEKTTMPLW	813414016
sp|P02662|CASA1_BOVIN"	IQKEDVPSER	600.8146++ 400.8788+++	2 3	600.814584 400.878815	IQKEDVPSER	1766158016
sp|P02662|CASA1_BOVIN"	IQKEDVPSERY	682.3462++ 455.2333+++	2 3	682.346248 455.233258	IQKEDVPSERY	1240681808
sp|P02662|CASA1_BOVIN"	IQKEDVPSERYL	492.9279+++	3	492.928	IQKEDVPSERYL	158722240
sp|P02662|CASA1_BOVIN"	IQKEDVPSERYLGYLEQ	1034.0233++	2	1034.02	IQKEDVPSERYLGYLEQ	890878144
sp|P02662|CASA1_BOVIN"	IQKEDVPSERYLGYLEQL	1090.5653++ 727.3793+++	2 3	1090.565326 727.379309	IQKEDVPSERYLGYLEQL	439342884
sp|P02662|CASA1_BOVIN"	IVPNSVEQKHIQKEDVPSER	603.8034++++	4	603.803	IVPNS[+80]VEQKHIQKEDVPSER	230629792
sp|P02662|CASA1_BOVIN"	IVPNSVEQKHIQKEDVPSER	583.8118++++	4	583.812	IVPNSVEQKHIQKEDVPSER	101930432
sp|P02662|CASA1_BOVIN"	KEDVPSER	480.2433++	2	480.243	KEDVPSER	79955232
sp|P02662|CASA1_BOVIN"	KEDVPSERY	561.7749++ 374.8524+++	2 3	561.774927 374.852377	KEDVPSERY	3872427904
sp|P02662|CASA1_BOVIN"	KEDVPSERYLG	431.5542+++	3	431.554	KEDVPSERYLG	149451408
sp|P02662|CASA1_BOVIN"	KEDVPSERYLGYLEQL	646.9984+++	3	646.998	KEDVPSERYLGYLEQL	97863824
sp|P02662|CASA1_BOVIN"	KHIQKEDVPSE	437.2297+++	3	437.23	KHIQKEDVPSE	57912816
sp|P02662|CASA1_BOVIN"	KHIQKEDVPSER	733.3915++ 489.2634+++ 367.1994++++	2 3 4	733.391521 489.26344 367.199399	KHIQKEDVPSER	2556260268
sp|P02662|CASA1_BOVIN"	NPIGSENSEKTT	638.8044++	2	638.804	NPIGSENSEKTT	11203618
sp|P02662|CASA1_BOVIN"	NPIGSENSEKTTMPLW	902.4327++	2	902.433	NPIGSENSEKTTMPLW	93763744
sp|P02662|CASA1_BOVIN"	NSVEQKHIQKEDVPSER	526.5021++++	4	526.502	NS[+80]VEQKHIQKEDVPSER	42575512
sp|P02662|CASA1_BOVIN"	PIGSENSEKTTMPLW	845.4113++	2	845.411	PIGSENSEKTTMPLW	242712448
sp|P02662|CASA1_BOVIN"	QKEDVPSERY	625.8042++	2	625.804	QKEDVPSERY	54636496
sp|P02662|CASA1_BOVIN"	QKHIQKEDVPSER	531.9496+++	3	531.95	QKHIQKEDVPSER	142397360
sp|P02662|CASA1_BOVIN"	QYTDAPSFSDIPNPIGSENSEKTTMPLW	1047.8168+++	3	1047.82	QYTDAPSFSDIPNPIGSENSEKTTM[+16]PLW	8019454
sp|P02662|CASA1_BOVIN"	QYTDAPSFSDIPNPIGSENSEKTTMPLW	1042.4851+++	3	1042.49	QYTDAPSFSDIPNPIGSENSEKTTMPLW	54944856
sp|P02662|CASA1_BOVIN"	SEEIVPNSVEQKHIQKEDVPSER	946.4300+++	3	946.43	S[+80]EEIVPNS[+80]VEQKHIQKEDVPSER	130055480
sp|P02662|CASA1_BOVIN"	SVEQKHIQKED	710.8270++ 474.2205+++	2 3	710.827038 474.220451	S[+80]VEQKHIQKED	2298025888
sp|P02662|CASA1_BOVIN"	SVEQKHIQKEDVPSE	916.9249++	2	916.925	S[+80]VEQKHIQKEDVPSE	32709470
sp|P02662|CASA1_BOVIN"	SVEQKHIQKEDVPSER	994.9755++ 663.6528+++ 497.9914++++	2 3 4	994.975493 663.652754 497.991385	S[+80]VEQKHIQKEDVPSER	10982296528
sp|P02662|CASA1_BOVIN"	SVEQKHIQKEDVPSERY	718.0072+++	3	718.007	S[+80]VEQKHIQKEDVPSERY	129364952
sp|P02662|CASA1_BOVIN"	SVEQKHIQKEDVPSERYL	755.7019+++	3	755.702	S[+80]VEQKHIQKEDVPSERYL	181846880
sp|P02662|CASA1_BOVIN"	SVEQKHIQKEDVPSERYLG	774.7090+++	3	774.709	S[+80]VEQKHIQKEDVPSERYLG	216160192
sp|P02662|CASA1_BOVIN"	SVEQKHIQKEDVPSERYLGY	829.0635+++ 622.0494++++	3 4	829.063483 622.049431	S[+80]VEQKHIQKEDVPSERYLGY	121863984
sp|P02662|CASA1_BOVIN"	SVEQKHIQKEDVPSERYLGYLE	909.7724+++	3	909.772	S[+80]VEQKHIQKEDVPSERYLGYLE	129012736
sp|P02662|CASA1_BOVIN"	SDIPNPIGSENSEKTTMPLW	1116.5281++ 744.6878+++	2 3	1116.528083 744.687814	SDIPNPIGSENSEKTTM[+16]PLW	6323645696
sp|P02662|CASA1_BOVIN"	SDIPNPIGSENSEKTTMPLW	1108.5306++ 739.3562+++	2 3	1108.530626 739.356176	SDIPNPIGSENSEKTTMPLW	3939355776
sp|P02662|CASA1_BOVIN"	SFSDIPNPIGSENSEKTTMPLW	1233.5783++ 822.7213+++	2 3	1233.578304 822.721295	SFSDIPNPIGSENSEKTTM[+16]PLW	119577516
sp|P02662|CASA1_BOVIN"	SFSDIPNPIGSENSEKTTMPLW	817.3897+++	3	817.39	SFSDIPNPIGSENSEKTTMPLW	69298792
sp|P02662|CASA1_BOVIN"	SVEQKHIQKE	409.2227+++	3	409.223	SVEQKHIQKE	82881048
sp|P02662|CASA1_BOVIN"	SVEQKHIQKED	670.8439++ 447.5650+++	2 3	670.843873 447.565007	SVEQKHIQKED	1116021088
sp|P02662|CASA1_BOVIN"	SVEQKHIQKEDVPSE	584.9636+++	3	584.964	SVEQKHIQKEDVPSE	515027296
sp|P02662|CASA1_BOVIN"	SVEQKHIQKEDVPSER	954.9923++ 636.9973+++ 477.9998++++	2 3 4	954.992328 636.997311 477.999802	SVEQKHIQKEDVPSER	6882991672
sp|P02662|CASA1_BOVIN"	SVEQKHIQKEDVPSERY	691.3518+++	3	691.352	SVEQKHIQKEDVPSERY	32864160
sp|P02662|CASA1_BOVIN"	SVEQKHIQKEDVPSERYL	729.0464+++ 547.0367++++	3 4	729.046442 547.03665	SVEQKHIQKEDVPSERYL	487318080
sp|P02662|CASA1_BOVIN"	SVEQKHIQKEDVPSERYLG	748.0536+++	3	748.054	SVEQKHIQKEDVPSERYLG	152549792
sp|P02662|CASA1_BOVIN"	TDAPSFSDIPNPIGSENSEKTTMP	851.0550+++	3	851.055	TDAPSFSDIPNPIGSENSEKTTM[+16]P	99778440
sp|P02662|CASA1_BOVIN"	TDAPSFSDIPNPIGSENSEKTTMPLW	1425.6606++ 950.7761+++	2 3	1425.660554 950.776128	TDAPSFSDIPNPIGSENSEKTTM[+16]PLW	489227648
sp|P02662|CASA1_BOVIN"	TDAPSFSDIPNPIGSENSEKTTMP	1268.0814++ 845.7234+++	2 3	1268.081408 845.723364	TDAPSFSDIPNPIGSENSEKTTMP	384802880
sp|P02662|CASA1_BOVIN"	TDAPSFSDIPNPIGSENSEKTTMPLW	945.4445+++	3	945.444	TDAPSFSDIPNPIGSENSEKTTMPLW	485257344
sp|P02662|CASA1_BOVIN"	TQYTDAPSFSDIPNPIGSENSEKTTMPLW	1081.4993+++	3	1081.5	TQYTDAPSFSDIPNPIGSENSEKTTM[+16]PLW	84799296
sp|P02662|CASA1_BOVIN"	VEQKHIQKEDVPSER	607.9866+++ 456.2418++++	3 4	607.986634 456.241795	VEQKHIQKEDVPSER	290145928
sp|P02662|CASA1_BOVIN"	YVPLGTQYTDAPSFSDIPNPIGSENSEKTTMPLW	1257.9293+++ 943.6988++++	3 4	1257.929334 943.69882	YVPLGTQYTDAPSFSDIPNPIGSENSEKTTM[+16]PLW	209712112
sp|P02662|CASA1_BOVIN"	YYVPLGTQYTDAPSFSDIPNPIGSENSEKTTMPL	1250.2573+++	3	1250.26	YYVPLGTQYTDAPSFSDIPNPIGSENSEKTTM[+16]PL	40503768
sp|P02662|CASA1_BOVIN" tr|B5B3R8|B5B3R8_BOVIN"	APFPEVFGK	496.2660++	2	496.266	APFPEVFGK	198099312
sp|P02662|CASA1_BOVIN" tr|B5B3R8|B5B3R8_BOVIN"	APFPEVFGKE	560.7873++	2	560.787	APFPEVFGKE	187501008
sp|P02662|CASA1_BOVIN" tr|B5B3R8|B5B3R8_BOVIN"	APFPEVFGKEK	624.8348++ 416.8923+++	2 3	624.834788 416.892284	APFPEVFGKEK	257633344
sp|P02662|CASA1_BOVIN" tr|B5B3R8|B5B3R8_BOVIN"	APFPEVFGKEKV	674.3690++ 449.9151+++	2 3	674.368995 449.915089	APFPEVFGKEKV	5868796672
sp|P02662|CASA1_BOVIN" tr|B5B3R8|B5B3R8_BOVIN"	APFPEVFGKEKVNE	530.9436+++	3	530.944	APFPEVFGKEKVNE	194062240
sp|P02662|CASA1_BOVIN" tr|B5B3R8|B5B3R8_BOVIN"	APFPEVFGKEKVNEL	568.6383+++	3	568.638	APFPEVFGKEKVNEL	183526656
sp|P02662|CASA1_BOVIN" tr|B5B3R8|B5B3R8_BOVIN"	APFPEVFGKEKVNELS	895.9698++ 597.6490+++	2 3	895.969802 597.64896	APFPEVFGKEKVNELS	1572769472
sp|P02662|CASA1_BOVIN" tr|B5B3R8|B5B3R8_BOVIN"	APFPEVFGKEKVNELSKD	678.6896+++	3	678.69	APFPEVFGKEKVNELSKD	176626608
sp|P02662|CASA1_BOVIN" tr|B5B3R8|B5B3R8_BOVIN"	AQQKEPMIGVNQELAYFYPE	791.0473+++	3	791.047	AQQKEPM[+16]IGVNQELAYFYPE	53023188
sp|P02662|CASA1_BOVIN" tr|B5B3R8|B5B3R8_BOVIN"	AQQKEPMIGVNQELAYFYPE	785.7157+++	3	785.716	AQQKEPMIGVNQELAYFYPE	48014288
sp|P02662|CASA1_BOVIN" tr|B5B3R8|B5B3R8_BOVIN"	AYFYPELFR	603.3031++	2	603.303	AYFYPELFR	69035376
sp|P02662|CASA1_BOVIN" tr|B5B3R8|B5B3R8_BOVIN"	DIGSESTEDQAMEDIK	892.3806++	2	892.381	DIGSESTEDQAM[+16]EDIK	317768064
sp|P02662|CASA1_BOVIN" tr|B5B3R8|B5B3R8_BOVIN"	DIGSESTEDQAMEDIK	884.3831++	2	884.383	DIGSESTEDQAMEDIK	302434208
sp|P02662|CASA1_BOVIN" tr|B5B3R8|B5B3R8_BOVIN"	DVPSERYLGYLE	720.8539++	2	720.854	DVPSERYLGYLE	126564296
sp|P02662|CASA1_BOVIN" tr|B5B3R8|B5B3R8_BOVIN"	DVPSERYLGYLEQL	841.4252++	2	841.425	DVPSERYLGYLEQL	229191424
sp|P02662|CASA1_BOVIN" tr|B5B3R8|B5B3R8_BOVIN"	EDIKQMEAE	546.7475++	2	546.748	EDIKQMEAE	291421120
sp|P02662|CASA1_BOVIN" tr|B5B3R8|B5B3R8_BOVIN"	EEIVPNSVEQK	676.3107++	2	676.311	EEIVPNS[+80]VEQK	677268288
sp|P02662|CASA1_BOVIN" tr|B5B3R8|B5B3R8_BOVIN"	EEIVPNSVEQK	636.3275++	2	636.328	EEIVPNSVEQK	401603936
sp|P02662|CASA1_BOVIN" tr|B5B3R8|B5B3R8_BOVIN"	EGIHAQQKEPMIGVNQE	641.9792+++	3	641.979	EGIHAQQKEPM[+16]IGVNQE	42933688
sp|P02662|CASA1_BOVIN" tr|B5B3R8|B5B3R8_BOVIN"	EGIHAQQKEPMIGVNQEL	679.6738+++	3	679.674	EGIHAQQKEPM[+16]IGVNQEL	3116613632
sp|P02662|CASA1_BOVIN" tr|B5B3R8|B5B3R8_BOVIN"	EGIHAQQKEPMIGVNQELA	703.3529+++	3	703.353	EGIHAQQKEPM[+16]IGVNQELA	1067040064
sp|P02662|CASA1_BOVIN" tr|B5B3R8|B5B3R8_BOVIN"	EGIHAQQKEPMIGVNQELAY	757.7073+++	3	757.707	EGIHAQQKEPM[+16]IGVNQELAY	184803104
sp|P02662|CASA1_BOVIN" tr|B5B3R8|B5B3R8_BOVIN"	EGIHAQQKEPMIGVNQELAYFYPE	936.4497+++	3	936.45	EGIHAQQKEPM[+16]IGVNQELAYFYPE	644907136
sp|P02662|CASA1_BOVIN" tr|B5B3R8|B5B3R8_BOVIN"	EGIHAQQKEPMIGVNQEL	1011.0097++ 674.3422+++	2 3	1011.009663 674.342201	EGIHAQQKEPMIGVNQEL	1622804032
sp|P02662|CASA1_BOVIN" tr|B5B3R8|B5B3R8_BOVIN"	EGIHAQQKEPMIGVNQELA	698.0212+++	3	698.021	EGIHAQQKEPMIGVNQELA	1269851776
sp|P02662|CASA1_BOVIN" tr|B5B3R8|B5B3R8_BOVIN"	EGIHAQQKEPMIGVNQELAY	1128.0599++ 752.3757+++	2 3	1128.059885 752.375682	EGIHAQQKEPMIGVNQELAY	1248972272
sp|P02662|CASA1_BOVIN" tr|B5B3R8|B5B3R8_BOVIN"	EGIHAQQKEPMIGVNQELAYF	801.3985+++	3	801.398	EGIHAQQKEPMIGVNQELAYF	78882976
sp|P02662|CASA1_BOVIN" tr|B5B3R8|B5B3R8_BOVIN"	EGIHAQQKEPMIGVNQELAYFYPE	931.1180+++	3	931.118	EGIHAQQKEPMIGVNQELAYFYPE	654239488
sp|P02662|CASA1_BOVIN" tr|B5B3R8|B5B3R8_BOVIN"	EIVPNSAEERLHSMK	607.2851+++	3	607.285	EIVPNS[+80]AEERLHSMK	895139840
sp|P02662|CASA1_BOVIN" tr|B5B3R8|B5B3R8_BOVIN"	EIVPNSVEQK	611.7894++	2	611.789	EIVPNS[+80]VEQK	996467968
sp|P02662|CASA1_BOVIN" tr|B5B3R8|B5B3R8_BOVIN"	EIVPNSAEERLHS	494.2512+++	3	494.251	EIVPNSAEERLHS	90573936
sp|P02662|CASA1_BOVIN" tr|B5B3R8|B5B3R8_BOVIN"	EIVPNSAEERLHSM	537.9314+++	3	537.931	EIVPNSAEERLHSM	300435744
sp|P02662|CASA1_BOVIN" tr|B5B3R8|B5B3R8_BOVIN"	EIVPNSAEERLHSM	543.2630+++	3	543.263	EIVPNSAEERLHSM[+16]	392884960
sp|P02662|CASA1_BOVIN" tr|B5B3R8|B5B3R8_BOVIN"	EKVNELSKDIGSESTEDQAMEDIK	979.0583+++	3	979.058	EKVNELS[+80]KDIGS[+80]ES[+80]TEDQAMEDIK	574657920
sp|P02662|CASA1_BOVIN" tr|B5B3R8|B5B3R8_BOVIN"	EKVNELSKD	531.2773++	2	531.277	EKVNELSKD	8356673024
sp|P02662|CASA1_BOVIN" tr|B5B3R8|B5B3R8_BOVIN"	EKVNELSKDIGS	699.8292++	2	699.829	EKVNELSKDIGS[+80]	183498000
sp|P02662|CASA1_BOVIN" tr|B5B3R8|B5B3R8_BOVIN"	EKVNELSKDIGSESTEDQAMEDIK	1428.1007++ 952.4029+++	2 3	1428.1007 952.402892	EKVNELSKDIGS[+80]ES[+80]TEDQAMEDIK	1708895568
sp|P02662|CASA1_BOVIN" tr|B5B3R8|B5B3R8_BOVIN"	EKVNELSKDIGSESTEDQAMEDIKQM	1038.7692+++	3	1038.77	EKVNELSKDIGS[+80]ES[+80]TEDQAMEDIKQM	60442708
sp|P02662|CASA1_BOVIN" tr|B5B3R8|B5B3R8_BOVIN"	EKVNELSKDIGSESTEDQAME	807.0121+++	3	807.012	EKVNELSKDIGS[+80]ESTEDQAME	248782176
sp|P02662|CASA1_BOVIN" tr|B5B3R8|B5B3R8_BOVIN"	EKVNELSKDIGSESTEDQAMED	845.3544+++	3	845.354	EKVNELSKDIGS[+80]ESTEDQAMED	580831744
sp|P02662|CASA1_BOVIN" tr|B5B3R8|B5B3R8_BOVIN"	EKVNELSKDIGSESTEDQAMEDIK	925.7474+++ 925.7474+++	3 3	925.747448 925.747448	EKVNELSKDIGS[+80]ESTEDQAMEDIK EKVNELS[+80]KDIGSESTEDQAMEDIK	4522825216
sp|P02662|CASA1_BOVIN" tr|B5B3R8|B5B3R8_BOVIN"	EKVNELSKDIGSESTEDQAMEDIKQMEAE	1121.8212+++	3	1121.82	EKVNELSKDIGS[+80]ESTEDQAMEDIKQMEAE	23766656
sp|P02662|CASA1_BOVIN" tr|B5B3R8|B5B3R8_BOVIN"	EKVNELSKDIGSESTED	980.4252++	2	980.425	EKVNELSKDIGSES[+80]TED	1406282752
sp|P02662|CASA1_BOVIN" tr|B5B3R8|B5B3R8_BOVIN"	EKVNELSKDIGSESTEDQAMEDIK	1388.1175++ 925.7474+++	2 3	1388.117534 925.747448	EKVNELSKDIGSES[+80]TEDQAMEDIK	2304153968
sp|P02662|CASA1_BOVIN" tr|B5B3R8|B5B3R8_BOVIN"	EKVNELSKDIGSESTE	588.9548+++	3	588.955	EKVNELSKDIGSESTE	84464992
sp|P02662|CASA1_BOVIN" tr|B5B3R8|B5B3R8_BOVIN"	EKVNELSKDIGSESTED	940.4420++ 627.2971+++	2 3	940.441999 627.297091	EKVNELSKDIGSESTED	5190598400
sp|P02662|CASA1_BOVIN" tr|B5B3R8|B5B3R8_BOVIN"	EKVNELSKDIGSESTEDQA	693.6623+++	3	693.662	EKVNELSKDIGSESTEDQA	74157072
sp|P02662|CASA1_BOVIN" tr|B5B3R8|B5B3R8_BOVIN"	EKVNELSKDIGSESTEDQAMED	824.0306+++	3	824.031	EKVNELSKDIGSESTEDQAM[+16]ED	1258271232
sp|P02662|CASA1_BOVIN" tr|B5B3R8|B5B3R8_BOVIN"	EKVNELSKDIGSESTEDQAMEDIK	1356.1318++ 904.4236+++ 678.5696++++	2 3 4	1356.131826 904.423643 678.569551	EKVNELSKDIGSESTEDQAM[+16]EDIK	5723223280
sp|P02662|CASA1_BOVIN" tr|B5B3R8|B5B3R8_BOVIN"	EKVNELSKDIGSESTEDQAMED	1227.5449++ 818.6990+++	2 3	1227.544855 818.698996	EKVNELSKDIGSESTEDQAMED	2780899072
sp|P02662|CASA1_BOVIN" tr|B5B3R8|B5B3R8_BOVIN"	EKVNELSKDIGSESTEDQAMEDI	856.3937+++	3	856.394	EKVNELSKDIGSESTEDQAMEDI	135203408
sp|P02662|CASA1_BOVIN" tr|B5B3R8|B5B3R8_BOVIN"	EKVNELSKDIGSESTEDQAMEDIK	1348.1344++ 899.0920+++ 674.5708++++	2 3 4	1348.134369 899.092005 674.570822	EKVNELSKDIGSESTEDQAMEDIK	6958830256
sp|P02662|CASA1_BOVIN" tr|B5B3R8|B5B3R8_BOVIN"	EKVNELSKDIGSESTEDQAMEDIKQMEAESISSSEEIVPNSVEQK	1254.0854++++ 1254.0854++++	4 4	1254.085419 1254.085419	EKVNELSKDIGSESTEDQAMEDIKQM[+16]EAESISSSEEIVPNSVEQK EKVNELSKDIGSESTEDQAM[+16]EDIKQMEAESISSSEEIVPNSVEQK	203015744
sp|P02662|CASA1_BOVIN" tr|B5B3R8|B5B3R8_BOVIN"	EKVNELSKDIGSESTEDQAMEDIKQMEAE	821.6262++++	4	821.626	EKVNELSKDIGSESTEDQAMEDIKQMEAE	53084448
sp|P02662|CASA1_BOVIN" tr|B5B3R8|B5B3R8_BOVIN"	EKVNELSKDIGSESTEDQAMEDIKQMEAESISSSEEIVPNSVEQK	1270.0783++++	4	1270.08	EKVNELSKDIGSESTEDQAMEDIKQMEAESIS[+80]SSEEIVPNSVEQK	14686468
sp|P02662|CASA1_BOVIN" tr|B5B3R8|B5B3R8_BOVIN"	EKVNELSKDIGSESTEDQAMEDIKQMEAESISSSEEIVPNSVEQK	1250.0867++++	4	1250.09	EKVNELSKDIGSESTEDQAMEDIKQMEAESISSSEEIVPNSVEQK	83159816
sp|P02662|CASA1_BOVIN" tr|B5B3R8|B5B3R8_BOVIN"	ENLLRFF	469.7584++	2	469.758	ENLLRFF	51464312
sp|P02662|CASA1_BOVIN" tr|B5B3R8|B5B3R8_BOVIN"	EVLNENLLR	550.3089++	2	550.309	EVLNENLLR	41419248
sp|P02662|CASA1_BOVIN" tr|B5B3R8|B5B3R8_BOVIN"	EVLNENLLRF	623.8431++	2	623.843	EVLNENLLRF	11500616704
sp|P02662|CASA1_BOVIN" tr|B5B3R8|B5B3R8_BOVIN"	FFVAPFPEVFGKEK	547.9607+++	3	547.961	FFVAPFPEVFGKEK	163147152
sp|P02662|CASA1_BOVIN" tr|B5B3R8|B5B3R8_BOVIN"	FFVAPFPEVFGKEKV	580.9835+++	3	580.984	FFVAPFPEVFGKEKV	41770724
sp|P02662|CASA1_BOVIN" tr|B5B3R8|B5B3R8_BOVIN"	FFVAPFPEVFGKEKVNE	662.0120+++	3	662.012	FFVAPFPEVFGKEKVNE	47289796
sp|P02662|CASA1_BOVIN" tr|B5B3R8|B5B3R8_BOVIN"	FFVAPFPEVFGKEKVNEL	699.7067+++	3	699.707	FFVAPFPEVFGKEKVNEL	47175948
sp|P02662|CASA1_BOVIN" tr|B5B3R8|B5B3R8_BOVIN"	FPEVFGKEK	360.8623+++	3	360.862	FPEVFGKEK	165992832
sp|P02662|CASA1_BOVIN" tr|B5B3R8|B5B3R8_BOVIN"	FPEVFGKEKV	393.8851+++	3	393.885	FPEVFGKEKV	41432000
sp|P02662|CASA1_BOVIN" tr|B5B3R8|B5B3R8_BOVIN"	FVAPFPEVFGK	619.3344++ 413.2254+++	2 3	619.334424 413.225375	FVAPFPEVFGK	12869051292
sp|P02662|CASA1_BOVIN" tr|B5B3R8|B5B3R8_BOVIN"	FVAPFPEVFGKE	683.8557++	2	683.856	FVAPFPEVFGKE	944494400
sp|P02662|CASA1_BOVIN" tr|B5B3R8|B5B3R8_BOVIN"	FVAPFPEVFGKEK	747.9032++ 498.9379+++	2 3	747.903202 498.937893	FVAPFPEVFGKEK	41503561728
sp|P02662|CASA1_BOVIN" tr|B5B3R8|B5B3R8_BOVIN"	FVAPFPEVFGKEKV	797.4374++ 531.9607+++	2 3	797.437409 531.960698	FVAPFPEVFGKEKV	12783447808
sp|P02662|CASA1_BOVIN" tr|B5B3R8|B5B3R8_BOVIN"	FVAPFPEVFGKEKVN	569.9750+++	3	569.975	FVAPFPEVFGKEKVN	239320864
sp|P02662|CASA1_BOVIN" tr|B5B3R8|B5B3R8_BOVIN"	FVAPFPEVFGKEKVNE	918.9802++ 612.9892+++	2 3	918.980169 612.989205	FVAPFPEVFGKEKVNE	2099610016
sp|P02662|CASA1_BOVIN" tr|B5B3R8|B5B3R8_BOVIN"	FVAPFPEVFGKEKVNEL	975.5222++ 650.6839+++	2 3	975.522201 650.683893	FVAPFPEVFGKEKVNEL	1961734816
sp|P02662|CASA1_BOVIN" tr|B5B3R8|B5B3R8_BOVIN"	FVAPFPEVFGKEKVNELS	1019.0382++ 679.6946+++	2 3	1019.038216 679.694569	FVAPFPEVFGKEKVNELS	2049126672
sp|P02662|CASA1_BOVIN" tr|B5B3R8|B5B3R8_BOVIN"	FVAPFPEVFGKEKVNELSK	1083.0857++ 722.3929+++ 542.0465++++	2 3 4	1083.085697 722.39289 542.046487	FVAPFPEVFGKEKVNELSK	6018955424
sp|P02662|CASA1_BOVIN" tr|B5B3R8|B5B3R8_BOVIN"	FVAPFPEVFGKEKVNELSKD	760.7352+++ 570.8032++++	3 4	760.735204 570.803222	FVAPFPEVFGKEKVNELSKD	5262063616
sp|P02662|CASA1_BOVIN" tr|B5B3R8|B5B3R8_BOVIN"	FVAPFPEVFGKEKVNELSKDIG	613.3296++++	4	613.33	FVAPFPEVFGKEKVNELSKDIG	88391552
sp|P02662|CASA1_BOVIN" tr|B5B3R8|B5B3R8_BOVIN"	GKEKVNELS	502.2746++	2	502.275	GKEKVNELS	272082368
sp|P02662|CASA1_BOVIN" tr|B5B3R8|B5B3R8_BOVIN"	GKEKVNELSK	566.3220++ 377.8838+++	2 3	566.322045 377.883789	GKEKVNELSK	297901604
sp|P02662|CASA1_BOVIN" tr|B5B3R8|B5B3R8_BOVIN"	GKEKVNELSKD	623.8355++ 416.2261+++	2 3	623.835516 416.226103	GKEKVNELSKD	1579610496
sp|P02662|CASA1_BOVIN" tr|B5B3R8|B5B3R8_BOVIN"	GKEKVNELSKDIG	472.9279+++	3	472.928	GKEKVNELSKDIG	538224192
sp|P02662|CASA1_BOVIN" tr|B5B3R8|B5B3R8_BOVIN"	GKEKVNELSKDIGSESTEDQAMEDIK	1014.1084+++	3	1014.11	GKEKVNELSKDIGS[+80]ES[+80]TEDQAMEDIK	54382572
sp|P02662|CASA1_BOVIN" tr|B5B3R8|B5B3R8_BOVIN"	GKEKVNELSKDIGSESTED	689.0026+++	3	689.003	GKEKVNELSKDIGSESTED	432739200
sp|P02662|CASA1_BOVIN" tr|B5B3R8|B5B3R8_BOVIN"	GKEKVNELSKDIGSESTEDQAMED	885.7361+++	3	885.736	GKEKVNELSKDIGSESTEDQAM[+16]ED	189751376
sp|P02662|CASA1_BOVIN" tr|B5B3R8|B5B3R8_BOVIN"	GKEKVNELSKDIGSESTEDQAMED	880.4045+++	3	880.404	GKEKVNELSKDIGSESTEDQAMED	279659488
sp|P02662|CASA1_BOVIN" tr|B5B3R8|B5B3R8_BOVIN"	GKEKVNELSKDIGSESTEDQAMEDIK	720.8499++++	4	720.85	GKEKVNELSKDIGSESTEDQAMEDIK	291737152
sp|P02662|CASA1_BOVIN" tr|B5B3R8|B5B3R8_BOVIN"	GLPQEVLNENL	613.3248++	2	613.325	GLPQEVLNENL	644111616
sp|P02662|CASA1_BOVIN" tr|B5B3R8|B5B3R8_BOVIN"	GLPQEVLNENLL	669.8668++	2	669.867	GLPQEVLNENLL	672944576
sp|P02662|CASA1_BOVIN" tr|B5B3R8|B5B3R8_BOVIN"	GLPQEVLNENLLR	747.9174++ 498.9473+++	2 3	747.917372 498.94734	GLPQEVLNENLLR	1362684576
sp|P02662|CASA1_BOVIN" tr|B5B3R8|B5B3R8_BOVIN"	GLPQEVLNENLLRF	821.4516++ 547.9701+++	2 3	821.451579 547.970145	GLPQEVLNENLLRF	3277166912
sp|P02662|CASA1_BOVIN" tr|B5B3R8|B5B3R8_BOVIN"	HPIKHQGLPQE	642.3464++	2	642.346	HPIKHQGLPQE	39259176
sp|P02662|CASA1_BOVIN" tr|B5B3R8|B5B3R8_BOVIN"	HPIKHQGLPQEV	461.5895+++	3	461.589	HPIKHQGLPQEV	466887296
sp|P02662|CASA1_BOVIN" tr|B5B3R8|B5B3R8_BOVIN"	HPIKHQGLPQEVL	748.4226++ 499.2842+++	2 3	748.422625 499.284175	HPIKHQGLPQEVL	1876991360
sp|P02662|CASA1_BOVIN" tr|B5B3R8|B5B3R8_BOVIN"	HPIKHQGLPQEVLN	537.2985+++	3	537.298	HPIKHQGLPQEVLN	646964672
sp|P02662|CASA1_BOVIN" tr|B5B3R8|B5B3R8_BOVIN"	HPIKHQGLPQEVLNENL	983.5289++ 492.2681++++	2 4	983.528881 492.268078	HPIKHQGLPQEVLNENL	133055680
sp|P02662|CASA1_BOVIN" tr|B5B3R8|B5B3R8_BOVIN"	HPIKHQGLPQEVLNENLL	1040.0709++ 693.7164+++ 520.5391++++	2 3 4	1040.070913 693.716367 520.539094	HPIKHQGLPQEVLNENLL	10739142592
sp|P02662|CASA1_BOVIN" tr|B5B3R8|B5B3R8_BOVIN"	HPIKHQGLPQEVLNENLLR	745.7501+++	3	745.75	HPIKHQGLPQEVLNENLLR	637247616
sp|P02662|CASA1_BOVIN" tr|B5B3R8|B5B3R8_BOVIN"	HPIKHQGLPQEVLNENLLRF	596.3315++++	4	596.331	HPIKHQGLPQEVLNENLLRF	450560704
sp|P02662|CASA1_BOVIN" tr|B5B3R8|B5B3R8_BOVIN"	HQGLPQEVLNENL	745.8835++	2	745.884	HQGLPQEVLNENL	199640048
sp|P02662|CASA1_BOVIN" tr|B5B3R8|B5B3R8_BOVIN"	HQGLPQEVLNENLLRF	636.3426+++	3	636.343	HQGLPQEVLNENLLRF	189503584
sp|P02662|CASA1_BOVIN" tr|B5B3R8|B5B3R8_BOVIN"	HSMKEGIHAQ	379.8538+++	3	379.854	HSMKEGIHAQ	72728336
sp|P02662|CASA1_BOVIN" tr|B5B3R8|B5B3R8_BOVIN"	HSMKEGIHAQQK	465.2383+++	3	465.238	HSMKEGIHAQQK	10666968
sp|P02662|CASA1_BOVIN" tr|B5B3R8|B5B3R8_BOVIN"	IGSESTEDQAMEDIK	834.8671++	2	834.867	IGSESTEDQAM[+16]EDIK	650051136
sp|P02662|CASA1_BOVIN" tr|B5B3R8|B5B3R8_BOVIN"	IGSESTEDQAMEDIK	826.8696++	2	826.87	IGSESTEDQAMEDIK	708436480
sp|P02662|CASA1_BOVIN" tr|B5B3R8|B5B3R8_BOVIN"	IGVNQELAYFYPE	771.8774++	2	771.877	IGVNQELAYFYPE	235311392
sp|P02662|CASA1_BOVIN" tr|B5B3R8|B5B3R8_BOVIN"	IKHQGLPQEVLNENLL	923.0151++ 615.6791+++	2 3	923.015075 615.679142	IKHQGLPQEVLNENLL	446724928
sp|P02662|CASA1_BOVIN" tr|B5B3R8|B5B3R8_BOVIN"	IKHQGLPQEVLNENLLRF	716.7357+++ 537.8036++++	3 4	716.73565 537.803557	IKHQGLPQEVLNENLLRF	96592280
sp|P02662|CASA1_BOVIN" tr|B5B3R8|B5B3R8_BOVIN"	IKQMEAESISSSEEIVPNSVEQK	860.0899+++	3	860.09	IKQM[+16]EAESISSSEEIVPNSVEQK	237466944
sp|P02662|CASA1_BOVIN" tr|B5B3R8|B5B3R8_BOVIN"	IKQMEAESISSSEEIVPNSVEQK	854.7583+++	3	854.758	IKQMEAESISSSEEIVPNSVEQK	520419904
sp|P02662|CASA1_BOVIN" tr|B5B3R8|B5B3R8_BOVIN"	IVPNSAEER	547.7475++	2	547.748	IVPNS[+80]AEER	114191360
sp|P02662|CASA1_BOVIN" tr|B5B3R8|B5B3R8_BOVIN"	IVPNSVEQK	547.2681++	2	547.268	IVPNS[+80]VEQK	768013824
sp|P02662|CASA1_BOVIN" tr|B5B3R8|B5B3R8_BOVIN"	IVPNSAEERLH	632.8359++	2	632.836	IVPNSAEERLH	104765072
sp|P02662|CASA1_BOVIN" tr|B5B3R8|B5B3R8_BOVIN"	IVPNSVEQK	507.2849++	2	507.285	IVPNSVEQK	441125216
sp|P02662|CASA1_BOVIN" tr|B5B3R8|B5B3R8_BOVIN"	KEGIHAQQKE	389.8754+++	3	389.875	KEGIHAQQKE	99328144
sp|P02662|CASA1_BOVIN" tr|B5B3R8|B5B3R8_BOVIN"	KEGIHAQQKEPM	698.3561++ 465.9065+++	2 3	698.356093 465.906487	KEGIHAQQKEPM	626704080
sp|P02662|CASA1_BOVIN" tr|B5B3R8|B5B3R8_BOVIN"	KEGIHAQQKEPM	706.3536++ 471.2381+++	2 3	706.353551 471.238126	KEGIHAQQKEPM[+16]	379006092
sp|P02662|CASA1_BOVIN" tr|B5B3R8|B5B3R8_BOVIN"	KEGIHAQQKEPMIG	527.9400+++	3	527.94	KEGIHAQQKEPM[+16]IG	55760512
sp|P02662|CASA1_BOVIN" tr|B5B3R8|B5B3R8_BOVIN"	KEGIHAQQKEPMIGVNQ	641.6633+++	3	641.663	KEGIHAQQKEPM[+16]IGVNQ	468540704
sp|P02662|CASA1_BOVIN" tr|B5B3R8|B5B3R8_BOVIN"	KEGIHAQQKEPMIGVNQEL	722.3722+++ 542.0309++++	3 4	722.37216 542.030939	KEGIHAQQKEPM[+16]IGVNQEL	3676775936
sp|P02662|CASA1_BOVIN" tr|B5B3R8|B5B3R8_BOVIN"	KEGIHAQQKEPMIGVNQELA	746.0512+++	3	746.051	KEGIHAQQKEPM[+16]IGVNQELA	37406804
sp|P02662|CASA1_BOVIN" tr|B5B3R8|B5B3R8_BOVIN"	KEGIHAQQKEPMIGVNQELAY	600.5560++++	4	600.556	KEGIHAQQKEPM[+16]IGVNQELAY	937248960
sp|P02662|CASA1_BOVIN" tr|B5B3R8|B5B3R8_BOVIN"	KEGIHAQQKEPMIGV	832.9431++ 555.6311+++	2 3	832.943064 555.631135	KEGIHAQQKEPMIGV	772245920
sp|P02662|CASA1_BOVIN" tr|B5B3R8|B5B3R8_BOVIN"	KEGIHAQQKEPMIGVN	593.6454+++	3	593.645	KEGIHAQQKEPMIGVN	376265472
sp|P02662|CASA1_BOVIN" tr|B5B3R8|B5B3R8_BOVIN"	KEGIHAQQKEPMIGVNQE	679.3458+++	3	679.346	KEGIHAQQKEPMIGVNQE	337423680
sp|P02662|CASA1_BOVIN" tr|B5B3R8|B5B3R8_BOVIN"	KEGIHAQQKEPMIGVNQEL	1075.0571++ 717.0405+++ 538.0322++++	2 3 4	1075.057145 717.040522 538.03221	KEGIHAQQKEPMIGVNQEL	4314433152
sp|P02662|CASA1_BOVIN" tr|B5B3R8|B5B3R8_BOVIN"	KEGIHAQQKEPMIGVNQELA	1110.5757++ 740.7196+++ 555.7915++++	2 3 4	1110.575702 740.71956 555.791489	KEGIHAQQKEPMIGVNQELA	1698394512
sp|P02662|CASA1_BOVIN" tr|B5B3R8|B5B3R8_BOVIN"	KEGIHAQQKEPMIGVNQELAY	1192.1074++ 795.0740+++ 596.5573++++	2 3 4	1192.107366 795.074003 596.557321	KEGIHAQQKEPMIGVNQELAY	654118192
sp|P02662|CASA1_BOVIN" tr|B5B3R8|B5B3R8_BOVIN"	KHPIKHQGLPQEVL	812.4701++ 541.9825+++ 406.7387++++	2 3 4	812.470106 541.982496 406.738691	KHPIKHQGLPQEVL	8151071360
sp|P02662|CASA1_BOVIN" tr|B5B3R8|B5B3R8_BOVIN"	KHPIKHQGLPQEVLN	435.2494++++	4	435.249	KHPIKHQGLPQEVLN	277301856
sp|P02662|CASA1_BOVIN" tr|B5B3R8|B5B3R8_BOVIN"	KHPIKHQGLPQEVLNE	623.0110+++	3	623.011	KHPIKHQGLPQEVLNE	148213632
sp|P02662|CASA1_BOVIN" tr|B5B3R8|B5B3R8_BOVIN"	KHPIKHQGLPQEVLNEN	661.0253+++ 496.0208++++	3 4	661.025312 496.020803	KHPIKHQGLPQEVLNEN	2724132352
sp|P02662|CASA1_BOVIN" tr|B5B3R8|B5B3R8_BOVIN"	KHPIKHQGLPQEVLNENL	1047.5764++ 698.7200+++ 524.2918++++	2 3 4	1047.576362 698.72 524.291819	KHPIKHQGLPQEVLNENL	1856977664
sp|P02662|CASA1_BOVIN" tr|B5B3R8|B5B3R8_BOVIN"	KHPIKHQGLPQEVLNENLL	736.4147+++	3	736.415	KHPIKHQGLPQEVLNENLL	5222040576
sp|P02662|CASA1_BOVIN" tr|B5B3R8|B5B3R8_BOVIN"	KHPIKHQGLPQEVLNENLLR	788.4484+++	3	788.448	KHPIKHQGLPQEVLNENLLR	232443104
sp|P02662|CASA1_BOVIN" tr|B5B3R8|B5B3R8_BOVIN"	KHPIKHQGLPQEVLNENLLRF	837.4712+++ 628.3552++++	3 4	837.471196 628.355216	KHPIKHQGLPQEVLNENLLRF	304104272
sp|P02662|CASA1_BOVIN" tr|B5B3R8|B5B3R8_BOVIN"	KHQGLPQEVL	574.8248++ 383.5523+++	2 3	574.824755 383.552262	KHQGLPQEVL	618142928
sp|P02662|CASA1_BOVIN" tr|B5B3R8|B5B3R8_BOVIN"	KHQGLPQEVLNENLL	577.9845+++	3	577.984	KHQGLPQEVLNENLL	86438152
sp|P02662|CASA1_BOVIN" tr|B5B3R8|B5B3R8_BOVIN"	KHQGLPQEVLNENLLR	944.5236++ 630.0182+++ 472.7654++++	2 3 4	944.523598 630.018158 472.765437	KHQGLPQEVLNENLLR	238597776
sp|P02662|CASA1_BOVIN" tr|B5B3R8|B5B3R8_BOVIN"	KHQGLPQEVLNENLLRF	679.0410+++ 509.5325++++	3 4	679.040962 509.532541	KHQGLPQEVLNENLLRF	310948720
sp|P02662|CASA1_BOVIN" tr|B5B3R8|B5B3R8_BOVIN"	KKYKVPQLEIVPNSAEERLHSM	669.8449++++	4	669.845	KKYKVPQLEIVPNS[+80]AEERLHSM	313972224
sp|P02662|CASA1_BOVIN" tr|B5B3R8|B5B3R8_BOVIN"	KKYKVPQLEIVPNSAEER	532.7995++++	4	532.799	KKYKVPQLEIVPNSAEER	359262016
sp|P02662|CASA1_BOVIN" tr|B5B3R8|B5B3R8_BOVIN"	KVNELSKDIGSESTEDQAMEDIK	861.4094+++ 646.3089++++	3 4	861.409445 646.308903	KVNELSKDIGSESTEDQAM[+16]EDIK	514019536
sp|P02662|CASA1_BOVIN" tr|B5B3R8|B5B3R8_BOVIN"	KVPQLEIVPN	568.8373++	2	568.837	KVPQLEIVPN	99780760
sp|P02662|CASA1_BOVIN" tr|B5B3R8|B5B3R8_BOVIN"	KVPQLEIVPNSAEERLH	680.3489+++	3	680.349	KVPQLEIVPNS[+80]AEERLH	354410880
sp|P02662|CASA1_BOVIN" tr|B5B3R8|B5B3R8_BOVIN"	KVPQLEIVPNSAEERLHSM	753.0397+++	3	753.04	KVPQLEIVPNS[+80]AEERLHSM	2294757376
sp|P02662|CASA1_BOVIN" tr|B5B3R8|B5B3R8_BOVIN"	KVPQLEIVPNSAEERLHSMK	597.0554++++	4	597.055	KVPQLEIVPNS[+80]AEERLHSMK	799653952
sp|P02662|CASA1_BOVIN" tr|B5B3R8|B5B3R8_BOVIN"	KVPQLEIVPNSAEER	854.9651++ 570.3125+++	2 3	854.965051 570.312459	KVPQLEIVPNSAEER	716323264
sp|P02662|CASA1_BOVIN" tr|B5B3R8|B5B3R8_BOVIN"	KVPQLEIVPNSAEERLHSM	726.3843+++ 545.0400++++	3 4	726.384289 545.040036	KVPQLEIVPNSAEERLHSM	942179632
sp|P02662|CASA1_BOVIN" tr|B5B3R8|B5B3R8_BOVIN"	KVPQLEIVPNSAEERLHSM	731.7159+++	3	731.716	KVPQLEIVPNSAEERLHSM[+16]	135851136
sp|P02662|CASA1_BOVIN" tr|B5B3R8|B5B3R8_BOVIN"	KYKVPQLEIVPN	714.4165++ 476.6134+++	2 3	714.416477 476.61341	KYKVPQLEIVPN	2531995776
sp|P02662|CASA1_BOVIN" tr|B5B3R8|B5B3R8_BOVIN"	KYKVPQLEIVPNSAEER	694.0207+++	3	694.021	KYKVPQLEIVPNS[+80]AEER	271949344
sp|P02662|CASA1_BOVIN" tr|B5B3R8|B5B3R8_BOVIN"	KYKVPQLEIVPNSAEERL	731.7154+++	3	731.715	KYKVPQLEIVPNS[+80]AEERL	100937592
sp|P02662|CASA1_BOVIN" tr|B5B3R8|B5B3R8_BOVIN"	KYKVPQLEIVPNSAEERLH	777.4017+++ 583.3031++++	3 4	777.401659 583.303063	KYKVPQLEIVPNS[+80]AEERLH	2717681920
sp|P02662|CASA1_BOVIN" tr|B5B3R8|B5B3R8_BOVIN"	KYKVPQLEIVPNSAEERLHS	605.0611++++	4	605.061	KYKVPQLEIVPNS[+80]AEERLHS	201073216
sp|P02662|CASA1_BOVIN" tr|B5B3R8|B5B3R8_BOVIN"	KYKVPQLEIVPNSAEERLHSM	850.0925+++ 637.8212++++	3 4	850.092496 637.821191	KYKVPQLEIVPNS[+80]AEERLHSM	5756501248
sp|P02662|CASA1_BOVIN" tr|B5B3R8|B5B3R8_BOVIN"	KYKVPQLEIVPNSAEERLHSMK	669.8449++++	4	669.845	KYKVPQLEIVPNS[+80]AEERLHSMK	1920259584
sp|P02662|CASA1_BOVIN" tr|B5B3R8|B5B3R8_BOVIN"	KYKVPQLEIVPNSAEER	1000.5442++ 667.3652+++ 500.7757++++	2 3 4	1000.544196 667.365223 500.775736	KYKVPQLEIVPNSAEER	1077807440
sp|P02662|CASA1_BOVIN" tr|B5B3R8|B5B3R8_BOVIN"	KYKVPQLEIVPNSAEERLH	563.3115++++	4	563.311	KYKVPQLEIVPNSAEERLH	360888384
sp|P02662|CASA1_BOVIN" tr|B5B3R8|B5B3R8_BOVIN"	KYKVPQLEIVPNSAEERLHSM	823.4371+++ 617.8296++++	3 4	823.437053 617.829608	KYKVPQLEIVPNSAEERLHSM	2465257280
sp|P02662|CASA1_BOVIN" tr|B5B3R8|B5B3R8_BOVIN"	KYKVPQLEIVPNSAEERLHSM	828.7687+++	3	828.769	KYKVPQLEIVPNSAEERLHSM[+16]	488396448
sp|P02662|CASA1_BOVIN" tr|B5B3R8|B5B3R8_BOVIN"	LEIVPNSAEER	668.8109++	2	668.811	LEIVPNS[+80]AEER	243596864
sp|P02662|CASA1_BOVIN" tr|B5B3R8|B5B3R8_BOVIN"	LEIVPNSAEER	628.8277++	2	628.828	LEIVPNSAEER	316775296
sp|P02662|CASA1_BOVIN" tr|B5B3R8|B5B3R8_BOVIN"	LEQLLRL	442.7818++	2	442.782	LEQLLRL	85141416
sp|P02662|CASA1_BOVIN" tr|B5B3R8|B5B3R8_BOVIN"	LGYLEQLLR	552.8242++	2	552.824	LGYLEQLLR	18111518
sp|P02662|CASA1_BOVIN" tr|B5B3R8|B5B3R8_BOVIN"	LKKYKVPQLEIVPN	557.0064+++	3	557.006	LKKYKVPQLEIVPN	117521080
sp|P02662|CASA1_BOVIN" tr|B5B3R8|B5B3R8_BOVIN"	LKKYKVPQLEIVPNSAEERLH	857.7947+++ 643.5978++++	3 4	857.794668 643.59782	LKKYKVPQLEIVPNS[+80]AEERLH	1276263232
sp|P02662|CASA1_BOVIN" tr|B5B3R8|B5B3R8_BOVIN"	LKKYKVPQLEIVPNSAEERLHSM	930.4855+++ 698.1159++++	3 4	930.485505 698.115948	LKKYKVPQLEIVPNS[+80]AEERLHSM	2763314688
sp|P02662|CASA1_BOVIN" tr|B5B3R8|B5B3R8_BOVIN"	LKKYKVPQLEIVPNSAEERLHSMK	730.1397++++	4	730.14	LKKYKVPQLEIVPNS[+80]AEERLHSMK	259173824
sp|P02662|CASA1_BOVIN" tr|B5B3R8|B5B3R8_BOVIN"	LKKYKVPQLEIVPNSAEER	747.7582+++ 561.0705++++	3 4	747.758232 561.070493	LKKYKVPQLEIVPNSAEER	1779693696
sp|P02662|CASA1_BOVIN" tr|B5B3R8|B5B3R8_BOVIN"	LKKYKVPQLEIVPNSAEERLH	623.6062++++	4	623.606	LKKYKVPQLEIVPNSAEERLH	111682680
sp|P02662|CASA1_BOVIN" tr|B5B3R8|B5B3R8_BOVIN"	LKKYKVPQLEIVPNSAEERLHSM	678.1244++++	4	678.124	LKKYKVPQLEIVPNSAEERLHSM	560616576
sp|P02662|CASA1_BOVIN" tr|B5B3R8|B5B3R8_BOVIN"	LKKYKVPQLEIVPNSAEERLHSM	909.1617+++ 682.1231++++	3 4	909.1617 682.123094	LKKYKVPQLEIVPNSAEERLHSM[+16]	377308224
sp|P02662|CASA1_BOVIN" tr|B5B3R8|B5B3R8_BOVIN"	LNENLLRF	509.7876++	2	509.788	LNENLLRF	942830080
sp|P02662|CASA1_BOVIN" tr|B5B3R8|B5B3R8_BOVIN"	LNENLLRFF	583.3218++	2	583.322	LNENLLRFF	127707760
sp|P02662|CASA1_BOVIN" tr|B5B3R8|B5B3R8_BOVIN"	LPQEVLNENLL	641.3561++	2	641.356	LPQEVLNENLL	460841920
sp|P02662|CASA1_BOVIN" tr|B5B3R8|B5B3R8_BOVIN"	LPQEVLNENLLR	719.4066++	2	719.407	LPQEVLNENLLR	206051648
sp|P02662|CASA1_BOVIN" tr|B5B3R8|B5B3R8_BOVIN"	LPQEVLNENLLRF	792.9408++ 528.9630+++	2 3	792.940847 528.96299	LPQEVLNENLLRF	189240144
sp|P02662|CASA1_BOVIN" tr|B5B3R8|B5B3R8_BOVIN"	LSKDIGSESTED	640.7963++	2	640.796	LSKDIGSESTED	80597400
sp|P02662|CASA1_BOVIN" tr|B5B3R8|B5B3R8_BOVIN"	LSKDIGSESTEDQAMEDIK	704.6598+++	3	704.66	LSKDIGSESTEDQAM[+16]EDIK	231342816
sp|P02662|CASA1_BOVIN" tr|B5B3R8|B5B3R8_BOVIN"	LSKDIGSESTEDQAMEDIK	699.3282+++	3	699.328	LSKDIGSESTEDQAMEDIK	203495456
sp|P02662|CASA1_BOVIN" tr|B5B3R8|B5B3R8_BOVIN"	NELSKDIGSESTED	802.3222++	2	802.322	NELSKDIGSES[+80]TED	99568160
sp|P02662|CASA1_BOVIN" tr|B5B3R8|B5B3R8_BOVIN"	NELSKDIGSESTED	762.3390++	2	762.339	NELSKDIGSESTED	655766528
sp|P02662|CASA1_BOVIN" tr|B5B3R8|B5B3R8_BOVIN"	NELSKDIGSESTEDQAMEDIK	785.6883+++	3	785.688	NELSKDIGSESTEDQAM[+16]EDIK	301785824
sp|P02662|CASA1_BOVIN" tr|B5B3R8|B5B3R8_BOVIN"	NELSKDIGSESTEDQAMEDIK	780.3567+++	3	780.357	NELSKDIGSESTEDQAMEDIK	41891488
sp|P02662|CASA1_BOVIN" tr|B5B3R8|B5B3R8_BOVIN"	NENLLRF	453.2456++	2	453.246	NENLLRF	22623680512
sp|P02662|CASA1_BOVIN" tr|B5B3R8|B5B3R8_BOVIN"	NENLLRFF	526.7798++	2	526.78	NENLLRFF	2272068864
sp|P02662|CASA1_BOVIN" tr|B5B3R8|B5B3R8_BOVIN"	QAMEDIKQME	627.7707++	2	627.771	QAM[+16]EDIKQM[+16]E	10508264
sp|P02662|CASA1_BOVIN" tr|B5B3R8|B5B3R8_BOVIN"	QAMEDIKQMEAE	727.8105++	2	727.811	QAM[+16]EDIKQM[+16]EAE	18483466
sp|P02662|CASA1_BOVIN" tr|B5B3R8|B5B3R8_BOVIN"	QAMEDIK	417.7049++	2	417.705	QAMEDIK	900124352
sp|P02662|CASA1_BOVIN" tr|B5B3R8|B5B3R8_BOVIN"	QAMEDIKQMEAESISSSEEIVPNSVEQK	1046.1602+++	3	1046.16	QAMEDIKQMEAESISSSEEIVPNSVEQK	109123688
sp|P02662|CASA1_BOVIN" tr|B5B3R8|B5B3R8_BOVIN"	QGLPQEVLNENLL	733.8961++	2	733.896	QGLPQEVLNENLL	25460320
sp|P02662|CASA1_BOVIN" tr|B5B3R8|B5B3R8_BOVIN"	QGLPQEVLNENLLR	811.9467++	2	811.947	QGLPQEVLNENLLR	35333516
sp|P02662|CASA1_BOVIN" tr|B5B3R8|B5B3R8_BOVIN"	QGLPQEVLNENLLRF	885.4809++ 590.6563+++	2 3	885.480868 590.656337	QGLPQEVLNENLLRF	183781512
sp|P02662|CASA1_BOVIN" tr|B5B3R8|B5B3R8_BOVIN"	RFFVAPFPEVFGK	514.2819+++	3	514.282	RFFVAPFPEVFGK	6589169
sp|P02662|CASA1_BOVIN" tr|B5B3R8|B5B3R8_BOVIN"	RPKHPIKHQ	570.8411++ 380.8965+++	2 3	570.841073 380.896474	RPKHPIKHQ	79261728
sp|P02662|CASA1_BOVIN" tr|B5B3R8|B5B3R8_BOVIN"	RPKHPIKHQGL	437.5983+++	3	437.598	RPKHPIKHQGL	18828830
sp|P02662|CASA1_BOVIN" tr|B5B3R8|B5B3R8_BOVIN"	RPKHPIKHQGLP	469.9492+++ 352.7137++++	3 4	469.949238 352.713748	RPKHPIKHQGLP	1946211008
sp|P02662|CASA1_BOVIN" tr|B5B3R8|B5B3R8_BOVIN"	RPKHPIKHQGLPQ	768.4495++ 512.6354+++ 384.7284++++	2 3 4	768.449508 512.635431 384.728392	RPKHPIKHQGLPQ	81101059968
sp|P02662|CASA1_BOVIN" tr|B5B3R8|B5B3R8_BOVIN"	RPKHPIKHQGLPQE	832.9708++ 555.6496+++ 416.9890++++	2 3 4	832.970805 555.649628 416.98904	RPKHPIKHQGLPQE	27365300928
sp|P02662|CASA1_BOVIN" tr|B5B3R8|B5B3R8_BOVIN"	RPKHPIKHQGLPQEV	882.5050++ 588.6724+++ 441.7561++++	2 3 4	882.505012 588.672433 441.756144	RPKHPIKHQGLPQEV	13304641328
sp|P02662|CASA1_BOVIN" tr|B5B3R8|B5B3R8_BOVIN"	RPKHPIKHQGLPQEVL	939.0470++ 626.3671+++ 470.0272++++	2 3 4	939.047044 626.367121 470.02716	RPKHPIKHQGLPQEVL	281364588544
sp|P02662|CASA1_BOVIN" tr|B5B3R8|B5B3R8_BOVIN"	RPKHPIKHQGLPQEVLN	996.0685++ 664.3814+++ 498.5379++++	2 3 4	996.068507 664.38143 498.537892	RPKHPIKHQGLPQEVLN	38516993600
sp|P02662|CASA1_BOVIN" tr|B5B3R8|B5B3R8_BOVIN"	RPKHPIKHQGLPQEVLNE	1060.5898++ 707.3956+++ 530.7985++++	2 3 4	1060.589804 707.395628 530.79854	RPKHPIKHQGLPQEVLNE	35285142400
sp|P02662|CASA1_BOVIN" tr|B5B3R8|B5B3R8_BOVIN"	RPKHPIKHQGLPQEVLNEN	1117.6113++ 745.4099+++ 559.3093++++	2 3 4	1117.611268 745.409937 559.309272	RPKHPIKHQGLPQEVLNEN	48554151744
sp|P02662|CASA1_BOVIN" tr|B5B3R8|B5B3R8_BOVIN"	RPKHPIKHQGLPQEVLNENL	1174.1533++ 783.1046+++ 587.5803++++	2 3 4	1174.1533 783.104625 587.580288	RPKHPIKHQGLPQEVLNENL	190468890112
sp|P02662|CASA1_BOVIN" tr|B5B3R8|B5B3R8_BOVIN"	RPKHPIKHQGLPQEVLNENLL	1230.6953++ 820.7993+++ 615.8513++++	2 3 4	1230.695332 820.799313 615.851304	RPKHPIKHQGLPQEVLNENLL	220049582848
sp|P02662|CASA1_BOVIN" tr|B5B3R8|B5B3R8_BOVIN"	RPKHPIKHQGLPQEVLNENLLR	872.8330+++ 654.8766++++	3 4	872.833017 654.876582	RPKHPIKHQGLPQEVLNENLLR	18343208704
sp|P02662|CASA1_BOVIN" tr|B5B3R8|B5B3R8_BOVIN"	RPKHPIKHQGLPQEVLNENLLRF	691.6437++++	4	691.644	RPKHPIKHQGLPQEVLNENLLRF	1694238592
sp|P02662|CASA1_BOVIN" tr|B5B3R8|B5B3R8_BOVIN"	SAEERLHSMKEGIHAQ	634.9558+++	3	634.956	S[+80]AEERLHSMKEGIHAQ	99283984
sp|P02662|CASA1_BOVIN" tr|B5B3R8|B5B3R8_BOVIN"	SEEIVPNSVEQK	759.8099++	2	759.81	S[+80]EEIVPNS[+80]VEQK	61928812
sp|P02662|CASA1_BOVIN" tr|B5B3R8|B5B3R8_BOVIN"	SVEQKHIQK	588.7923++	2	588.792	S[+80]VEQKHIQK	7676558
sp|P02662|CASA1_BOVIN" tr|B5B3R8|B5B3R8_BOVIN"	SAEERLHSM	530.2480++	2	530.248	SAEERLHSM	3347425280
sp|P02662|CASA1_BOVIN" tr|B5B3R8|B5B3R8_BOVIN"	SAEERLHSM	538.2455++	2	538.245	SAEERLHSM[+16]	1822667520
sp|P02662|CASA1_BOVIN" tr|B5B3R8|B5B3R8_BOVIN"	SAEERLHSMKEGIHAQ	456.4771++++	4	456.477	SAEERLHSMKEGIHAQ	99369144
sp|P02662|CASA1_BOVIN" tr|B5B3R8|B5B3R8_BOVIN"	SAEERLHSMKEGIHAQQK	693.6848+++	3	693.685	SAEERLHSMKEGIHAQQK	36862400
sp|P02662|CASA1_BOVIN" tr|B5B3R8|B5B3R8_BOVIN"	SESTEDQAMEDIK	749.8143++	2	749.814	SESTEDQAM[+16]EDIK	99443864
sp|P02662|CASA1_BOVIN" tr|B5B3R8|B5B3R8_BOVIN"	SKDIGSESTEDQ	648.2835++	2	648.284	SKDIGSESTEDQ	9086713
sp|P02662|CASA1_BOVIN" tr|B5B3R8|B5B3R8_BOVIN"	SKDIGSESTEDQA	683.8021++	2	683.802	SKDIGSESTEDQA	13128706
sp|P02662|CASA1_BOVIN" tr|B5B3R8|B5B3R8_BOVIN"	SKDIGSESTEDQAM	757.3198++	2	757.32	SKDIGSESTEDQAM[+16]	11614608
sp|P02662|CASA1_BOVIN" tr|B5B3R8|B5B3R8_BOVIN"	SKDIGSESTEDQAMED	879.3545++	2	879.355	SKDIGSESTEDQAM[+16]ED	136172192
sp|P02662|CASA1_BOVIN" tr|B5B3R8|B5B3R8_BOVIN"	SKDIGSESTEDQAMEDIK	666.9651+++	3	666.965	SKDIGSESTEDQAM[+16]EDIK	221215120
sp|P02662|CASA1_BOVIN" tr|B5B3R8|B5B3R8_BOVIN"	SKDIGSESTEDQAMEDIKQMEAESISSSEEIVPNSVEQK	1075.9915++++	4	1075.99	SKDIGSESTEDQAM[+16]EDIKQMEAESISSSEEIVPNSVEQK	26176404
sp|P02662|CASA1_BOVIN" tr|B5B3R8|B5B3R8_BOVIN"	SKDIGSESTEDQAMED	871.3571++	2	871.357	SKDIGSESTEDQAMED	245520736
sp|P02662|CASA1_BOVIN" tr|B5B3R8|B5B3R8_BOVIN"	SKDIGSESTEDQAMEDIK	661.6335+++	3	661.633	SKDIGSESTEDQAMEDIK	256006064
sp|P02662|CASA1_BOVIN" tr|B5B3R8|B5B3R8_BOVIN"	SMKEGIHAQQ	564.7769++	2	564.777	SMKEGIHAQQ	62807152
sp|P02662|CASA1_BOVIN" tr|B5B3R8|B5B3R8_BOVIN"	SMKEGIHAQQK	628.8244++ 419.5520+++	2 3	628.824429 419.552045	SMKEGIHAQQK	267002332
sp|P02662|CASA1_BOVIN" tr|B5B3R8|B5B3R8_BOVIN"	SMKEGIHAQQKEPM	538.5973+++	3	538.597	SMKEGIHAQQKEPM	97229232
sp|P02662|CASA1_BOVIN" tr|B5B3R8|B5B3R8_BOVIN"	STEDQAMEDIK	641.7770++	2	641.777	STEDQAM[+16]EDIK	27463178
sp|P02662|CASA1_BOVIN" tr|B5B3R8|B5B3R8_BOVIN"	STEDQAMEDIK	633.7795++	2	633.78	STEDQAMEDIK	61509984
sp|P02662|CASA1_BOVIN" tr|B5B3R8|B5B3R8_BOVIN"	VAPFPEVF	453.2420++	2	453.242	VAPFPEVF	378884224
sp|P02662|CASA1_BOVIN" tr|B5B3R8|B5B3R8_BOVIN"	VAPFPEVFG	481.7527++	2	481.753	VAPFPEVFG	625388160
sp|P02662|CASA1_BOVIN" tr|B5B3R8|B5B3R8_BOVIN"	VAPFPEVFGK	545.8002++	2	545.8	VAPFPEVFGK	7748091904
sp|P02662|CASA1_BOVIN" tr|B5B3R8|B5B3R8_BOVIN"	VAPFPEVFGKEK	674.3690++ 449.9151+++	2 3	674.368995 449.915089	VAPFPEVFGKEK	24816584704
sp|P02662|CASA1_BOVIN" tr|B5B3R8|B5B3R8_BOVIN"	VAPFPEVFGKEKV	723.9032++ 482.9379+++	2 3	723.903202 482.937893	VAPFPEVFGKEKV	20760773120
sp|P02662|CASA1_BOVIN" tr|B5B3R8|B5B3R8_BOVIN"	VAPFPEVFGKEKVN	520.9522+++	3	520.952	VAPFPEVFGKEKVN	413961120
sp|P02662|CASA1_BOVIN" tr|B5B3R8|B5B3R8_BOVIN"	VAPFPEVFGKEKVNE	845.4460++ 563.9664+++	2 3	845.445962 563.9664	VAPFPEVFGKEKVNE	3499622336
sp|P02662|CASA1_BOVIN" tr|B5B3R8|B5B3R8_BOVIN"	VAPFPEVFGKEKVNEL	901.9880++ 601.6611+++	2 3	901.987994 601.661088	VAPFPEVFGKEKVNEL	7201090688
sp|P02662|CASA1_BOVIN" tr|B5B3R8|B5B3R8_BOVIN"	VAPFPEVFGKEKVNELS	945.5040++ 630.6718+++	2 3	945.504009 630.671764	VAPFPEVFGKEKVNELS	2991053376
sp|P02662|CASA1_BOVIN" tr|B5B3R8|B5B3R8_BOVIN"	VAPFPEVFGKEKVNELSKDIGSESTEDQAMEDIK	1002.4394++++	4	1002.44	VAPFPEVFGKEKVNELS[+80]KDIGS[+80]ES[+80]TEDQAMEDIK	121536320
sp|P02662|CASA1_BOVIN" tr|B5B3R8|B5B3R8_BOVIN"	VAPFPEVFGKEKVNELSKDIGSESTEDQAMEDIK	982.4478++++	4	982.448	VAPFPEVFGKEKVNELS[+80]KDIGSES[+80]TEDQAMEDIK	266079840
sp|P02662|CASA1_BOVIN" tr|B5B3R8|B5B3R8_BOVIN"	VAPFPEVFGKEKVNELSK	673.3701+++ 505.2794++++	3 4	673.370085 505.279383	VAPFPEVFGKEKVNELSK	8284044800
sp|P02662|CASA1_BOVIN" tr|B5B3R8|B5B3R8_BOVIN"	VAPFPEVFGKEKVNELSKD	1067.0650++ 711.7124+++ 534.0361++++	2 3 4	1067.064962 711.7124 534.036119	VAPFPEVFGKEKVNELSKD	11824846720
sp|P02662|CASA1_BOVIN" tr|B5B3R8|B5B3R8_BOVIN"	VAPFPEVFGKEKVNELSKDIG	768.4142+++ 576.5625++++	3 4	768.414242 576.562501	VAPFPEVFGKEKVNELSKDIG	1603652800
sp|P02662|CASA1_BOVIN" tr|B5B3R8|B5B3R8_BOVIN"	VFGKEKVNE	525.2849++ 350.5257+++	2 3	525.284931 350.525713	VFGKEKVNE	175327880
sp|P02662|CASA1_BOVIN" tr|B5B3R8|B5B3R8_BOVIN"	VFGKEKVNEL	581.8270++	2	581.827	VFGKEKVNEL	208312832
sp|P02662|CASA1_BOVIN" tr|B5B3R8|B5B3R8_BOVIN"	VFGKEKVNELSK	459.9294+++	3	459.929	VFGKEKVNELSK	182676192
sp|P02662|CASA1_BOVIN" tr|B5B3R8|B5B3R8_BOVIN"	VLNENLLRF	559.3218++	2	559.322	VLNENLLRF	485240640
sp|P02662|CASA1_BOVIN" tr|B5B3R8|B5B3R8_BOVIN"	VNELSKDIGSESTEDQAMEDIK	840.0349+++	3	840.035	VNELSKDIGS[+80]ESTEDQAMEDIK	327971168
sp|P02662|CASA1_BOVIN" tr|B5B3R8|B5B3R8_BOVIN"	VNELSKDIGSE	595.7986++	2	595.799	VNELSKDIGSE	156645168
sp|P02662|CASA1_BOVIN" tr|B5B3R8|B5B3R8_BOVIN"	VNELSKDIGSESTED	811.8732++	2	811.873	VNELSKDIGSESTED	1106131968
sp|P02662|CASA1_BOVIN" tr|B5B3R8|B5B3R8_BOVIN"	VNELSKDIGSESTEDQAMEDIK	1227.5630++ 818.7111+++	2 3	1227.563048 818.711124	VNELSKDIGSESTEDQAM[+16]EDIK	2810836416
sp|P02662|CASA1_BOVIN" tr|B5B3R8|B5B3R8_BOVIN"	VNELSKDIGSESTEDQAMEDIKQMEAESISSSEEIVPNSVEQK	1193.7998++++	4	1193.8	VNELSKDIGSESTEDQAM[+16]EDIKQM[+16]EAESISSSEEIVPNSVEQK	92193216
sp|P02662|CASA1_BOVIN" tr|B5B3R8|B5B3R8_BOVIN"	VNELSKDIGSESTEDQAMED	1098.9761++	2	1098.98	VNELSKDIGSESTEDQAMED	118478056
sp|P02662|CASA1_BOVIN" tr|B5B3R8|B5B3R8_BOVIN"	VNELSKDIGSESTEDQAMEDIKQMEAESISSSEEIVPNSVEQK	1189.8010++++ 1189.8010++++	4 4	1189.80103 1189.80103	VNELSKDIGSESTEDQAMEDIKQM[+16]EAESISSSEEIVPNSVEQK VNELSKDIGSESTEDQAM[+16]EDIKQMEAESISSSEEIVPNSVEQK	76867024
sp|P02662|CASA1_BOVIN" tr|B5B3R8|B5B3R8_BOVIN"	VPNSAEERLH	576.2938++ 384.5316+++	2 3	576.293819 384.531638	VPNSAEERLH	591683256
sp|P02662|CASA1_BOVIN" tr|B5B3R8|B5B3R8_BOVIN"	VPNSAEERLHSM	462.5541+++	3	462.554	VPNSAEERLHSM[+16]	76225488
sp|P02662|CASA1_BOVIN" tr|B5B3R8|B5B3R8_BOVIN"	VPQLEIVPN	504.7898++	2	504.79	VPQLEIVPN	753660544
sp|P02662|CASA1_BOVIN" tr|B5B3R8|B5B3R8_BOVIN"	VPQLEIVPNSAEERLH	955.9722++ 637.6506+++	2 3	955.972222 637.650574	VPQLEIVPNS[+80]AEERLH	925725440
sp|P02662|CASA1_BOVIN" tr|B5B3R8|B5B3R8_BOVIN"	VPQLEIVPNSAEERLHSM	1065.0085++ 710.3414+++	2 3	1065.008479 710.341411	VPQLEIVPNS[+80]AEERLHSM	2264166912
sp|P02662|CASA1_BOVIN" tr|B5B3R8|B5B3R8_BOVIN"	VPQLEIVPNSAEERLHSMK	1129.0560++ 753.0397+++ 565.0316++++	2 3 4	1129.055961 753.039732 565.031618	VPQLEIVPNS[+80]AEERLHSMK	3731120864
sp|P02662|CASA1_BOVIN" tr|B5B3R8|B5B3R8_BOVIN"	VPQLEIVPNSAEERLHSMKE	597.2923++++	4	597.292	VPQLEIVPNS[+80]AEERLHSMKE	63554232
sp|P02662|CASA1_BOVIN" tr|B5B3R8|B5B3R8_BOVIN"	VPQLEIVPNSAEERLHSMKEGIHAQQ	755.8719++++	4	755.872	VPQLEIVPNS[+80]AEERLHSMKEGIHAQQ	116511704
sp|P02662|CASA1_BOVIN" tr|B5B3R8|B5B3R8_BOVIN"	VPQLEIVPNSAEERLHS	640.0058+++	3	640.006	VPQLEIVPNSAEERLHS	447019008
sp|P02662|CASA1_BOVIN" tr|B5B3R8|B5B3R8_BOVIN"	VPQLEIVPNSAEERLHSM	1025.0253++ 683.6860+++	2 3	1025.025314 683.685968	VPQLEIVPNSAEERLHSM	1776456992
sp|P02662|CASA1_BOVIN" tr|B5B3R8|B5B3R8_BOVIN"	VPQLEIVPNSAEERLHSMK	545.0400++++	4	545.04	VPQLEIVPNSAEERLHSMK	235517088
sp|P02662|CASA1_BOVIN" tr|B5B3R8|B5B3R8_BOVIN"	VPSERYLGY	542.2771++	2	542.277	VPSERYLGY	893593664
sp|P02662|CASA1_BOVIN" tr|B5B3R8|B5B3R8_BOVIN"	VPSERYLGYLE	663.3404++	2	663.34	VPSERYLGYLE	1479348736
sp|P02662|CASA1_BOVIN" tr|B5B3R8|B5B3R8_BOVIN"	VPSERYLGYLEQ	727.3697++	2	727.37	VPSERYLGYLEQ	1676548736
sp|P02662|CASA1_BOVIN" tr|B5B3R8|B5B3R8_BOVIN"	VPSERYLGYLEQL	783.9118++ 522.9436+++	2 3	783.911755 522.943596	VPSERYLGYLEQL	1216509040
sp|P02662|CASA1_BOVIN" tr|B5B3R8|B5B3R8_BOVIN"	YKVPQLEIVPN	650.3690++	2	650.369	YKVPQLEIVPN	2949150464
sp|P02662|CASA1_BOVIN" tr|B5B3R8|B5B3R8_BOVIN"	YKVPQLEIVPNSAE	833.9080++	2	833.908	YKVPQLEIVPNS[+80]AE	98990752
sp|P02662|CASA1_BOVIN" tr|B5B3R8|B5B3R8_BOVIN"	YKVPQLEIVPNSAEER	976.4799++ 651.3223+++	2 3	976.47988 651.322346	YKVPQLEIVPNS[+80]AEER	709667616
sp|P02662|CASA1_BOVIN" tr|B5B3R8|B5B3R8_BOVIN"	YKVPQLEIVPNSAEERLH	551.2793++++	4	551.279	YKVPQLEIVPNS[+80]AEERLH	162302432
sp|P02662|CASA1_BOVIN" tr|B5B3R8|B5B3R8_BOVIN"	YKVPQLEIVPNSAEERLHS	763.7140+++	3	763.714	YKVPQLEIVPNS[+80]AEERLHS	17816412160
sp|P02662|CASA1_BOVIN" tr|B5B3R8|B5B3R8_BOVIN"	YKVPQLEIVPNSAEERLHSM	807.3942+++ 605.7975++++	3 4	807.394175 605.79745	YKVPQLEIVPNS[+80]AEERLHSM	2844541440
sp|P02662|CASA1_BOVIN" tr|B5B3R8|B5B3R8_BOVIN"	YKVPQLEIVPNSAEERLHSMK	637.8212++++	4	637.821	YKVPQLEIVPNS[+80]AEERLHSMK	2226875904
sp|P02662|CASA1_BOVIN" tr|B5B3R8|B5B3R8_BOVIN"	YKVPQLEIVPNSAEER	936.4967++ 624.6669+++	2 3	936.496715 624.666902	YKVPQLEIVPNSAEER	3015550080
sp|P02662|CASA1_BOVIN" tr|B5B3R8|B5B3R8_BOVIN"	YKVPQLEIVPNSAEERLH	708.0479+++ 531.2877++++	3 4	708.047894 531.287739	YKVPQLEIVPNSAEERLH	999675200
sp|P02662|CASA1_BOVIN" tr|B5B3R8|B5B3R8_BOVIN"	YKVPQLEIVPNSAEERLHS	737.0586+++	3	737.059	YKVPQLEIVPNSAEERLHS	458956672
sp|P02662|CASA1_BOVIN" tr|B5B3R8|B5B3R8_BOVIN"	YKVPQLEIVPNSAEERLHSM	780.7387+++ 585.8059++++	3 4	780.738732 585.805868	YKVPQLEIVPNSAEERLHSM	1788162240
sp|P02662|CASA1_BOVIN" tr|B5B3R8|B5B3R8_BOVIN"	YKVPQLEIVPNSAEERLHSM	786.0704+++ 589.8046++++	3 4	786.07037 589.804596	YKVPQLEIVPNSAEERLHSM[+16]	4239651328
sp|P02662|CASA1_BOVIN" tr|B5B3R8|B5B3R8_BOVIN"	YLEQLLRL	524.3135++	2	524.313	YLEQLLRL	39314440
sp|P02662|CASA1_BOVIN" tr|B5B3R8|B5B3R8_BOVIN"	YLEQLLRLK	588.3610++	2	588.361	YLEQLLRLK	54307484
sp|P02662|CASA1_BOVIN" tr|B5B3R8|B5B3R8_BOVIN"	YLGYLEQLLR	634.3559++	2	634.356	YLGYLEQLLR	11076776
sp|P02662|CASA1_BOVIN" tr|B5B3R8|B5B3R8_BOVIN"	YQLDAYPSGAWY	717.3222++	2	717.322	YQLDAYPSGAWY	45860528
sp|P02662|CASA1_BOVIN" tr|B5B3R8|B5B3R8_BOVIN"	YVPLGTQYTDAPSFSD	880.9043++	2	880.904	YVPLGTQYTDAPSFSD	166078608
sp|P02663|CASA2_BOVIN"	AEVATEEVK	488.2533++	2	488.253	AEVATEEVK	61785880
sp|P02663|CASA2_BOVIN"	ALNEINQFY	556.2746++	2	556.275	ALNEINQFY	1130633600
sp|P02663|CASA2_BOVIN"	ALNEINQFYQKFPQYL	672.6790+++	3	672.679	ALNEINQFYQKFPQYL	11528202
sp|P02663|CASA2_BOVIN"	ALNEINQFYQKFPQYLQY	1154.0759++ 769.7197+++	2 3	1154.075861 769.719666	ALNEINQFYQKFPQYLQY	595292416
sp|P02663|CASA2_BOVIN"	ALPQYLKTVY	598.3397++	2	598.34	ALPQYLKTVY	616544896
sp|P02663|CASA2_BOVIN"	AMKPWIQPK	557.8075++	2	557.808	AM[+16]KPWIQPK	94500256
sp|P02663|CASA2_BOVIN"	AMKPWIQPKTKVIPY	606.0112+++	3	606.011	AM[+16]KPWIQPKTKVIPY	163115088
sp|P02663|CASA2_BOVIN"	AMKPWIQPK	366.8758+++	3	366.876	AMKPWIQPK	189311536
sp|P02663|CASA2_BOVIN"	AVPITPTLNREQLSTSEENSKKTVDMESTEVFTK	973.2249++++	4	973.225	AVPITPTLNREQLS[+80]TSEENSKKTVDMESTEVFTK	312324416
sp|P02663|CASA2_BOVIN"	DKHYQKALN	372.8647+++	3	372.865	DKHYQKALN	46139328
sp|P02663|CASA2_BOVIN"	DKHYQKALNEIN	736.8782++ 491.5879+++	2 3	736.878247 491.587923	DKHYQKALNEIN	362505272
sp|P02663|CASA2_BOVIN"	DKHYQKALNEINQF	874.4417++ 583.2969+++	2 3	874.441743 583.29692	DKHYQKALNEINQF	1882155968
sp|P02663|CASA2_BOVIN"	EEVKITVDDKHYQ	535.2703+++ 401.7045++++	3 4	535.27026 401.704514	EEVKITVDDKHYQ	282144876
sp|P02663|CASA2_BOVIN"	EEVKITVDDKHYQK	577.9686+++ 433.7283++++	3 4	577.968581 433.728255	EEVKITVDDKHYQK	575119008
sp|P02663|CASA2_BOVIN"	ENSKKTVDMESTEVFTKK	546.0091++++	4	546.009	ENS[+80]KKTVDMESTEVFTKK	100963400
sp|P02663|CASA2_BOVIN"	ENSKKTVDMESTEVFTKK	727.6763+++	3	727.676	ENSKKTVDMES[+80]TEVFTKK	98366224
sp|P02663|CASA2_BOVIN"	ENSKKTVDMESTEVFTKK	526.0175++++	4	526.017	ENSKKTVDMESTEVFTKK	107937392
sp|P02663|CASA2_BOVIN"	EQLSTSEENSKKTVD	927.8739++	2	927.874	EQLS[+80]TS[+80]EENSKKTVD	23900354
sp|P02663|CASA2_BOVIN"	EQLSTSEENSKKTVDMESTEVFTK	943.0912+++	3	943.091	EQLS[+80]TSEENSKKTVDMESTEVFTK	97330080
sp|P02663|CASA2_BOVIN"	EQLSTSEENSKKT	494.2424+++	3	494.242	EQLSTSEENSKKT	24745154
sp|P02663|CASA2_BOVIN"	ESIISQETYKQEK	831.8848++	2	831.885	ESIIS[+80]QETYKQEK	415110912
sp|P02663|CASA2_BOVIN"	ESTEVFTKK	534.7822++ 356.8572+++	2 3	534.782221 356.857239	ESTEVFTKK	304414800
sp|P02663|CASA2_BOVIN"	ESTEVFTKKTK	433.2381+++	3	433.238	ESTEVFTKKTK	109299032
sp|P02663|CASA2_BOVIN"	EVKITVDDKHYQ	737.8805++ 492.2561+++ 369.4439++++	2 3 4	737.880455 492.256062 369.443866	EVKITVDDKHYQ	1168089952
sp|P02663|CASA2_BOVIN"	EVKITVDDKHYQK	801.9279++ 534.9544+++ 401.4676++++	2 3 4	801.927937 534.954383 401.467606	EVKITVDDKHYQK	1255813040
sp|P02663|CASA2_BOVIN"	EVVRNANEEE	594.7782++	2	594.778	EVVRNANEEE	90906432
sp|P02663|CASA2_BOVIN"	FALPQYLKT	540.8080++	2	540.808	FALPQYLKT	646395264
sp|P02663|CASA2_BOVIN"	FALPQYLKTVY	671.8739++	2	671.874	FALPQYLKTVY	90804400
sp|P02663|CASA2_BOVIN"	FLKKISQ	432.2711++	2	432.271	FLKKISQ	314907744
sp|P02663|CASA2_BOVIN"	FLKKISQRY	591.8533++	2	591.853	FLKKISQRY	191023168
sp|P02663|CASA2_BOVIN"	FYQKFPQYLQYLYQGPIVLNPWDQ	762.8878++++	4	762.888	FYQKFPQYLQYLYQGPIVLNPWDQ	152837888
sp|P02663|CASA2_BOVIN"	GPIVLNPWDQVK	683.3799++	2	683.38	GPIVLNPWDQVK	219475280
sp|P02663|CASA2_BOVIN"	HVSSSEESIISQETYKQEK	763.6809+++	3	763.681	HVSSSEESIIS[+80]QETYKQEK	8896450
sp|P02663|CASA2_BOVIN"	HVSSSEESIISQETYKQE	694.3272+++	3	694.327	HVSSSEESIISQETYKQE	80866120
sp|P02663|CASA2_BOVIN"	HVSSSEESIISQETYKQEK	737.0255+++	3	737.025	HVSSSEESIISQETYKQEK	788960128
sp|P02663|CASA2_BOVIN"	IISQETYKQEK	723.8474++	2	723.847	IIS[+80]QETYKQEK	530286720
sp|P02663|CASA2_BOVIN"	IISQETYK	491.2662++	2	491.266	IISQETYK	207340016
sp|P02663|CASA2_BOVIN"	IISQETYKQE	619.8168++	2	619.817	IISQETYKQE	96502944
sp|P02663|CASA2_BOVIN"	IQPKTKVIPY	593.8633++	2	593.863	IQPKTKVIPY	770459328
sp|P02663|CASA2_BOVIN"	IQPKTKVIPYVR	481.3012+++	3	481.301	IQPKTKVIPYVR	107804584
sp|P02663|CASA2_BOVIN"	IQPKTKVIPYVRYL	573.3503+++	3	573.35	IQPKTKVIPYVRYL	66376552
sp|P02663|CASA2_BOVIN"	ISQRYQKF	535.2931++	2	535.293	ISQRYQKF	79533680
sp|P02663|CASA2_BOVIN"	ITVDDKHYQ	559.7775++ 373.5207+++	2 3	559.77747 373.520739	ITVDDKHYQ	532424592
sp|P02663|CASA2_BOVIN"	ITVDDKHYQK	623.8250++	2	623.825	ITVDDKHYQK	7473041
sp|P02663|CASA2_BOVIN"	KALNEINQF	538.7904++	2	538.79	KALNEINQF	72012744
sp|P02663|CASA2_BOVIN"	KAMKPWIQPK	414.9058+++	3	414.906	KAM[+16]KPWIQPK	261022784
sp|P02663|CASA2_BOVIN"	KAMKPWIQPK	409.5741+++	3	409.574	KAMKPWIQPK	533344768
sp|P02663|CASA2_BOVIN"	KHYQKALNEINQF	816.9283++ 544.9546+++	2 3	816.928271 544.954606	KHYQKALNEINQF	1369656256
sp|P02663|CASA2_BOVIN"	KITVDDKHYQ	416.2191+++	3	416.219	KITVDDKHYQ	185966128
sp|P02663|CASA2_BOVIN"	KKISQRY	461.7771++	2	461.777	KKISQRY	118143552
sp|P02663|CASA2_BOVIN"	KKISQRYQ	350.8733+++	3	350.873	KKISQRYQ	254612288
sp|P02663|CASA2_BOVIN"	KKISQRYQKFALPQY	633.3597+++	3	633.36	KKISQRYQKFALPQY	781399552
sp|P02663|CASA2_BOVIN"	KLTEEEKNR	382.8753+++	3	382.875	KLTEEEKNR	359567104
sp|P02663|CASA2_BOVIN"	KLTEEEKNRL	420.5700+++	3	420.57	KLTEEEKNRL	94838432
sp|P02663|CASA2_BOVIN"	KLTEEEKNRLN	687.3728++ 458.5843+++	2 3	687.372797 458.58429	KLTEEEKNRLN	952084624
sp|P02663|CASA2_BOVIN"	KLTEEEKNRLNFL	545.3018+++	3	545.302	KLTEEEKNRLNFL	859807360
sp|P02663|CASA2_BOVIN"	KLTEEEKNRLNFLK	441.2519++++	4	441.252	KLTEEEKNRLNFLK	107744032
sp|P02663|CASA2_BOVIN"	KNTMEHVSSSEESIISQETY	1190.0065++ 793.6734+++ 793.6734+++	2 3 3	1190.006527 793.673444 793.673444	KNT[+80]MEHVSSSEESIISQETY KNTMEHVSSSEESIISQET[+80]Y KNTMEHVSS[+80]SEESIISQETY	792692032
sp|P02663|CASA2_BOVIN"	KNTMEHVSSSEESIISQETYK	1254.0540++ 836.3718+++ 836.3718+++ 627.5306++++	2 3 3 4	1254.054009 836.371765 836.371765 627.530642	KNT[+80]MEHVSSSEESIISQETYK KNTMEHVSS[+80]SEESIISQETYK	13762704192
sp|P02663|CASA2_BOVIN"	KNTMEHVSSSEESIISQETYKQEK	964.7705+++ 723.8297++++ 723.8297++++	3 4 4	964.770476 723.829676 723.829676	KNT[+80]MEHVSSSEESIISQETYKQEK KNTMEHVSSSEES[+80]IISQETYKQEK	58010309632
sp|P02663|CASA2_BOVIN"	KNTMEHVSSSEE	697.2986++ 465.2015+++	2 3	697.298638 465.201517	KNTM[+16]EHVSSSEE	63351761
sp|P02663|CASA2_BOVIN"	KNTMEHVSSSEESIISQE	1025.9653++ 684.3126+++	2 3	1025.965316 684.312636	KNTM[+16]EHVSSSEESIISQE	702500520
sp|P02663|CASA2_BOVIN"	KNTMEHVSSSEESIISQETY	772.3496+++	3	772.35	KNTM[+16]EHVSSSEESIISQETY	2045968640
sp|P02663|CASA2_BOVIN"	KNTMEHVSSSEESIISQETYK	1222.0683++ 815.0480+++ 611.5378++++	2 3 4	1222.068301 815.047959 611.537788	KNTM[+16]EHVSSSEESIISQETYK	7020111296
sp|P02663|CASA2_BOVIN"	KNTMEHVSSSEESIISQETYKQE	1350.6189++ 900.7483+++ 675.8131++++	2 3 4	1350.618886 900.748349 675.813081	KNTM[+16]EHVSSSEESIISQETYKQE	9796757392
sp|P02663|CASA2_BOVIN"	KNTMEHVSSSEESIISQETYKQEK	1414.6664++ 943.4467+++ 707.8368++++	2 3 4	1414.666368 943.44667 707.836822	KNTM[+16]EHVSSSEESIISQETYKQEK	45758163440
sp|P02663|CASA2_BOVIN"	KNTMEHVSSSEESIISQETYKQEKNM	773.1064++++	4	773.106	KNTM[+16]EHVSSSEESIISQETYKQEKNM[+16]	76556368
sp|P02663|CASA2_BOVIN"	KNTMEHVSSSEESIISQETYK	889.6827+++	3	889.683	KNTMEHVS[+80]S[+80]SEES[+80]IISQETYK	3127090688
sp|P02663|CASA2_BOVIN"	KNTMEHVSSSEESIISQETYKQEK	1018.0814+++ 763.8128++++ 1018.0814+++ 1018.0814+++ 763.8128++++	3 4 3 3 4	1018.081363 763.812841 1018.081363 1018.081363 763.812841	KNTMEHVS[+80]S[+80]SEESIIS[+80]QETYKQEK KNTMEHVS[+80]S[+80]SEES[+80]IISQETYKQEK KNTMEHVS[+80]S[+80]S[+80]EESIISQETYKQEK	30390959104
sp|P02663|CASA2_BOVIN"	KNTMEHVSSSEESIISQETYK	863.0272+++	3	863.027	KNTMEHVS[+80]S[+80]SEESIISQETYK	3877857536
sp|P02663|CASA2_BOVIN"	KNTMEHVSSSEESIISQETYKQEK	991.4259+++ 991.4259+++ 743.8213++++	3 3 4	991.425919 991.425919 743.821259	KNTMEHVS[+80]SSEESIIS[+80]QETYKQEK KNTMEHVS[+80]S[+80]SEESIISQETYKQEK	23471390720
sp|P02663|CASA2_BOVIN"	KNTMEHVSSSEESIISQETYKQEK	964.7705+++	3	964.77	KNTMEHVS[+80]SSEESIISQETYKQEK	11798246400
sp|P02663|CASA2_BOVIN"	KNTMEHVSSSEE	769.2675++	2	769.268	KNTMEHVSS[+80]S[+80]EE	143646672
sp|P02663|CASA2_BOVIN"	KNTMEHVSSSEES	812.7835++	2	812.784	KNTMEHVSS[+80]S[+80]EES	33610176
sp|P02663|CASA2_BOVIN"	KNTMEHVSSSEESIISQETYK	1334.0203++ 1334.0203++ 889.6827+++ 1334.0203++ 889.6827+++	2 2 3 2 3	1334.02034 1334.02034 889.682652 1334.02034 889.682652	KNTMEHVSS[+80]S[+80]EES[+80]IISQETYK KNTMEHVS[+80]S[+80]SEESIIS[+80]QETYK KNTMEHVS[+80]S[+80]S[+80]EESIISQETYK	8650193280
sp|P02663|CASA2_BOVIN"	KNTMEHVSSSEESIISQETYKQEK	1018.0814+++	3	1018.08	KNTMEHVSS[+80]S[+80]EES[+80]IISQETYKQEK	7645223936
sp|P02663|CASA2_BOVIN"	KNTMEHVSSSEESIISQE	1137.9174++ 1137.9174++	2 2	1137.917355 1137.917355	KNTMEHVSS[+80]S[+80]EESIIS[+80]QE KNTMEHVSS[+80]S[+80]EES[+80]IISQE	727768832
sp|P02663|CASA2_BOVIN"	KNTMEHVSSSEESIISQETYK	889.6827+++	3	889.683	KNTMEHVSS[+80]S[+80]EESIIS[+80]QETYK	3127090688
sp|P02663|CASA2_BOVIN"	KNTMEHVSSSEESIISQETYKQE	975.3830+++ 975.3830+++ 975.3830+++	3 3 3	975.383042 975.383042 975.383042	KNTMEHVSS[+80]S[+80]EESIIS[+80]QETYKQE KNTMEHVSS[+80]S[+80]EES[+80]IISQETYKQE KNTMEHVS[+80]S[+80]SEESIIS[+80]QETYKQE	399440400
sp|P02663|CASA2_BOVIN"	KNTMEHVSSSEESIISQETYKQEK	1526.6184++ 1018.0814+++ 763.8128++++	2 3 4	1526.618407 1018.081363 763.812841	KNTMEHVSS[+80]S[+80]EESIIS[+80]QETYKQEK	11386352722
sp|P02663|CASA2_BOVIN"	KNTMEHVSSSEESIISQETY	1229.9897++	2	1229.99	KNTMEHVSS[+80]S[+80]EESIISQETY	242136688
sp|P02663|CASA2_BOVIN"	KNTMEHVSSSEE	729.2843++	2	729.284	KNTMEHVSS[+80]SEE	126026424
sp|P02663|CASA2_BOVIN"	KNTMEHVSSSEESIISQE	1097.9342++ 732.2919+++	2 3	1097.934189 732.291885	KNTMEHVSS[+80]SEESIIS[+80]QE	391106432
sp|P02663|CASA2_BOVIN"	KNTMEHVSSSEESIISQETYKQE	948.7276+++ 948.7276+++	3 3	948.727598 948.727598	KNTMEHVSS[+80]SEESIIS[+80]QETYKQE KNTMEHVSS[+80]S[+80]EESIISQETYKQE	1343728896
sp|P02663|CASA2_BOVIN"	KNTMEHVSSSEESIISQETYKQEK	743.8213++++ 743.8213++++	4 4	743.821259 743.821259	KNTMEHVSS[+80]SEESIIS[+80]QETYKQEK KNTMEHVSS[+80]S[+80]EESIISQETYKQEK	15715618816
sp|P02663|CASA2_BOVIN"	KNTMEHVSSSEESIISQETYKQEK	964.7705+++ 723.8297++++	3 4	964.770476 723.829676	KNTMEHVSS[+80]SEESIISQETYKQEK	34904278016
sp|P02663|CASA2_BOVIN"	KNTMEHVSSSEESIISQETYK	1294.0372++ 1294.0372++ 863.0272+++ 1294.0372++ 863.0272+++	2 2 3 2 3	1294.037174 1294.037174 863.027208 1294.037174 863.027208	KNTMEHVSSS[+80]EESIIS[+80]QETYK KNTMEHVSS[+80]SEESIIS[+80]QETYK KNTMEHVSS[+80]S[+80]EESIISQETYK	9373201152
sp|P02663|CASA2_BOVIN"	KNTMEHVSSSE	624.7799++	2	624.78	KNTMEHVSSSE	80261584
sp|P02663|CASA2_BOVIN"	KNTMEHVSSSEE	689.3012++ 459.8699+++	2 3	689.30118 459.869879	KNTMEHVSSSEE	546609568
sp|P02663|CASA2_BOVIN"	KNTMEHVSSSEES	732.8172++	2	732.817	KNTMEHVSSSEES	214437312
sp|P02663|CASA2_BOVIN"	KNTMEHVSSSEESIISQE	1057.9510++ 705.6364+++ 1057.9510++	2 3 2	1057.951024 705.636441 1057.951024	KNTMEHVSSSEESIIS[+80]QE KNTMEHVSS[+80]SEESIISQE	1545546688
sp|P02663|CASA2_BOVIN"	KNTMEHVSSSEESIISQETY	1190.0065++	2	1190.01	KNTMEHVSSSEESIIS[+80]QETY	147594240
sp|P02663|CASA2_BOVIN"	KNTMEHVSSSEESIISQETYK	1254.0540++ 836.3718+++ 627.5306++++ 1254.0540++	2 3 4 2	1254.054009 836.371765 627.530642 1254.054009	KNTMEHVSSSEESIIS[+80]QETYK KNTMEHVSSS[+80]EESIISQETYK	10599013616
sp|P02663|CASA2_BOVIN"	KNTMEHVSSSEESIISQETYKQE	1382.6046++ 922.0722+++ 691.8059++++ 1382.6046++ 922.0722+++ 691.8059++++	2 3 4 2 3 4	1382.604594 922.072155 691.805935 1382.604594 922.072155 691.805935	KNTMEHVSSSEESIIS[+80]QETYKQE KNTMEHVSSS[+80]EESIISQETYKQE	7134037440
sp|P02663|CASA2_BOVIN"	KNTMEHVSSSEESIISQETYKQEK	1446.6521++ 964.7705+++ 723.8297++++ 1446.6521++	2 3 4 2	1446.652076 964.770476 723.829676 1446.652076	KNTMEHVSSSEESIIS[+80]QETYKQEK KNTMEHVSSS[+80]EESIISQETYKQEK	35292736864
sp|P02663|CASA2_BOVIN"	KNTMEHVSSSEESIISQETYKQEKN	752.3404++++	4	752.34	KNTMEHVSSSEESIIS[+80]QETYKQEKN	146723808
sp|P02663|CASA2_BOVIN"	KNTMEHVSSSEESIISQE	1017.9679++ 678.9810+++	2 3	1017.967858 678.980997	KNTMEHVSSSEESIISQE	1567892160
sp|P02663|CASA2_BOVIN"	KNTMEHVSSSEESIISQETY	1150.0234++ 767.0180+++	2 3	1150.023362 767.018	KNTMEHVSSSEESIISQETY	2786145344
sp|P02663|CASA2_BOVIN"	KNTMEHVSSSEESIISQETYK	1214.0708++ 809.7163+++ 607.5391++++	2 3 4	1214.070843 809.716321 607.53906	KNTMEHVSSSEESIISQETYK	20362836224
sp|P02663|CASA2_BOVIN"	KNTMEHVSSSEESIISQETYKQE	1342.6214++ 895.4167+++ 671.8144++++	2 3 4	1342.621429 895.416711 671.814352	KNTMEHVSSSEESIISQETYKQE	15866878720
sp|P02663|CASA2_BOVIN"	KNTMEHVSSSEESIISQETYKQEK	1406.6689++ 938.1150+++ 703.8381++++	2 3 4	1406.66891 938.115032 703.838093	KNTMEHVSSSEESIISQETYKQEK	83161578752
sp|P02663|CASA2_BOVIN"	KNTMEHVSSSEESIISQETYKQEKN	976.1293+++ 732.3488++++	3 4	976.129341 732.348825	KNTMEHVSSSEESIISQETYKQEKN	437562720
sp|P02663|CASA2_BOVIN"	KTKLTEEE	489.2611++	2	489.261	KTKLTEEE	103905328
sp|P02663|CASA2_BOVIN"	KTKLTEEEK	553.3086++	2	553.309	KTKLTEEEK	59674184
sp|P02663|CASA2_BOVIN"	KTKLTEEEKN	610.3301++ 407.2225+++	2 3	610.330067 407.22247	KTKLTEEEKN	796716504
sp|P02663|CASA2_BOVIN"	KTKLTEEEKNR	459.2562+++	3	459.256	KTKLTEEEKNR	459332640
sp|P02663|CASA2_BOVIN"	KTKLTEEEKNRL	744.9227++ 496.9509+++ 372.9650++++	2 3 4	744.922654 496.950862 372.964965	KTKLTEEEKNRL	3488200784
[truncated: 1,564 more rows]

## Sheet: J NP ND
Protein	Peptide	Precursor	Precursor Charge	Precursor Mz	Peptide Modified Sequence	B4 Total Area
[truncated: 1,210 more rows]

[truncated: 8 more sheets: W LT G, J LT G, W NP G, J NP G, W LT Int, J LT Int, W NP Int, J NP Int]
