# Supplementary material for: Interactions between whey proteins and cranberry juice after thermal or non-thermal processing duringin vitrogastrointestinal digestion
Source: Royal Society of Chemistry journal article supplement (doi:10.1039/d0fo00177e), 2020-01-01
Supplement: d0fo00177e3.xlsx [file d0fo00177e3.xlsx]

## Sheet: Sample key
Sample Key
Acronyms	Stands for
W	Water
J	Cranberry juice
WP	Whey Protein
ND	Non-digested
WP	Whey Protein
NP	Non-processing
LT	Long thermal treatment
Gast	Gastric digestion
Intes	Intestinal digestion
Water+WP	Cranberry juice+WP
W LT ND	J LT ND
W NP ND	J NP ND
W LT Gast	J LT Gast
W NP Gast	J NP Gast
W LT Intes	J LT Intes
W NP Intes	J NP Intes

## Sheet: List of bioactive peptides
Peptide sequence	Protein matched	protein description	intervals	function	secondary function	title	authors	doi	W LT ND	J LT ND	W NP ND	J NP ND	W LT G	J LT G	W NP G	J NP G	W LT Int	J LT Int	W NP Int	J NP Int
LKALPMH	P02754	Beta-lactoglobulin	156-162	ACE-inhibitory	(1) Cushman and Cheung (1971) 11 ÂµM.	(1) Do whey protein-derived peptides have dual dipeptidyl-peptidase IV and angiotensin I-converting enzyme inhibitory activities?.	Lacroix, Isabelle	10.1016/j.jff.2015.11.038	P	A	P	A	P	P	P	P	A	A	A	A
IQKVAGTW	P02754	Beta-lactoglobulin	28-35	ACE-inhibitory	(1) Cushman and Cheung (1971) 51 ÂµM.	(1) Do whey protein-derived peptides have dual dipeptidyl-peptidase IV and angiotensin I-converting enzyme inhibitory activities?.	Lacroix, Isabelle	10.1016/j.jff.2015.11.038	A	A	P	A	P	P	P	P	A	A	A	A
LDAQSAPLR	P02754	Beta-lactoglobulin	48-56	ACE-inhibitory	(1) Cushman and Cheung (1971) 635 ÂµM.	(1) Angiotensin I-converting enzyme inhibitory properties of whey protein digests: concentration and characterization of active peptides.	Pihlanto-Leppala, Anne	10.1017/S0022029999003982	P	A	A	A	P	P	P	P	A	A	A	A
DAQSAPLRVY	P02754	Beta-lactoglobulin	49-58	ACE-inhibitory	(1) Sentandreu and Toldra (2006) 12,2 ÂµM. , (2) Sentandreu and Toldra (2006) 11,62 ÂµM.	(1) Novel whey-derived peptides with inhibitory effect against angiotensin-converting enzyme: In vitro effect and stability to gastrointestinal enzymes. , (2) The Portuguese Paradox: Why do some inhabitants of Portugal appear to live so long when their diet is based on whey cheese?.	Tavares, Tania G, Tavares, Tania G	10.1016/j.peptides.2011.02.005, 10.1016/j.foodchem.2011.09.052	A	A	A	A	P	P	P	P	A	A	A	A
FSDKIAK	P02668	Kappa-casein	39-45	ACE-inhibitory	(1) Cushman and Cheung (1971) 113,6 ÂµM.	(1) Casein hydrolysates as a source of antimicrobial, antioxidant and antihypertensive peptides.	Lopez-Exposito, Ivan	10.1051/lait:2007019	A	A	A	A	A	A	P	P	A	A	A	A
KGYGGVSL	P00711	Alpha-lactalbumin	35-42	ACE-inhibitory	(1) Sentandreu and Toldra (2006) 300,9 ÂµM. , (2) Sentandreu and Toldra (2006) 325,2 ÂµM.	(1) Novel whey-derived peptides with inhibitory effect against angiotensin-converting enzyme: In vitro effect and stability to gastrointestinal enzymes. , (2) The Portuguese Paradox: Why do some inhabitants of Portugal appear to live so long when their diet is based on whey cheese?.	Tavares, Tania G, Tavares, Tania G	10.1016/j.peptides.2011.02.005, 10.1016/j.foodchem.2011.09.052	A	A	A	A	A	A	A	P	A	A	A	A
YKVPQL	P02662	Alpha-S1-casein	119-124	ACE-inhibitory	(1) Cushman and Cheung (1971) 22 ÂµM.	(1) Identification of an Antihypertensive Peptide from Casein Hydrolysate Produced by a Proteinase from Lactobacillus helveticus CP790.	Maeno, Masafumi	10.3168/jds.S0022-0302(96)76487-1	A	A	A	P	A	A	P	A	A	A	A	A
LHLPLPL	P02666	Beta-casein	148-154	ACE-inhibitory	(1) Cushman and Cheung (1971) 425 ÂµM.	(1) Identification of novel antihypertensive peptides in milk fermented with Enterococcus faecalis.	Quiros, Ana	10.1016/j.idairyj.2005.12.011	A	A	A	A	A	A	P	A	A	A	A	A
WLAHKAL	P00711	Alpha-lactalbumin	123-129	ACE-inhibitory	(1) Cushman and Cheung (1971) 29 ÂµM.	(1) Do whey protein-derived peptides have dual dipeptidyl-peptidase IV and angiotensin I-converting enzyme inhibitory activities?.	Lacroix, Isabelle	10.1016/j.jff.2015.11.038	A	A	A	A	P	P	A	A	A	A	A	A
LKGYGGVSLPEW	P00711	Alpha-lactalbumin	34-45	ACE-inhibitory	(1) Cushman and Cheung (1971) 83 ÂµM.	(1) Fractionation and identification of ACE-inhibitory peptides from alpha-Lactalbumin and beta-casein produced by thermolysin-catalysed hydrolysis.	Otte, Jeanette	10.1016/j.idairyj.2007.04.008	A	A	A	A	P	A	A	A	A	A	A	A
KGYGGVSLPEW	P00711	Alpha-lactalbumin	35-45	ACE-inhibitory	(1) Sentandreu and Toldra (2006) 0,7 ÂµM. , (2) Sentandreu and Toldra (2006) 0,71 ÂµM.	(1) Novel whey-derived peptides with inhibitory effect against angiotensin-converting enzyme: In vitro effect and stability to gastrointestinal enzymes. , (2) The Portuguese Paradox: Why do some inhabitants of Portugal appear to live so long when their diet is based on whey cheese?.	Tavares, Tania G, Tavares, Tania G	10.1016/j.peptides.2011.02.005, 10.1016/j.foodchem.2011.09.052	A	A	A	A	P	A	A	A	A	A	A	A
ALNEINQFY	P02663	Alpha-S2-casein	96-104	ACE-inhibitory	(1) Cushman and Cheung (1971) 219 ÂµM.	(1) Angiotensin-I-converting enzyme inhibitory peptides from tryptic hydrolysate of bovine alphaS2-casein.	Tauzin, Jerome	10.1016/S0014-5793(02)03576-7	P	P	P	P	A	A	A	A	A	A	A	A
EPVLGPVRGPFP	P02666	Beta-casein	210-221	ACE-inhibitory	(1) Cushman and Cheung (1971) 790 ÂµM.	(1) Casein Fermentate of Lactobacillus animalisDPC6134 Contains a Range of Novel Propeptide Angiotensin-Converting Enzyme Inhibitors.	Hayes, M	10.1128/AEM.00096-07	P	A	P	P	A	A	A	A	A	A	A	A
FFVAPFPEVFGK	P02662	Alpha-S1-casein	38-49	ACE-inhibitory	(1) Cushman and Cheung (1971) 52 ÂµM. , (2) Cushman and Cheung (1971) 77 ÂµM. , (3) Cushman and Cheung (1971) 18 ÂµM.	(1) Antihypertensive effect of the bovine casein-derived peptide Met-Lys-Pro. , (2) A Peptide Inhibitor of Angiotensin I Converting Enzyme in the Tryptic Hydrolysate of Casein. , (3) Angiotensin-I-converting enzyme inhibitory peptides from tryptic hydrolysate of bovine alphaS2-casein.	Yamada, Akio, Maruyama, Susumu, Tauzin, Jerome	10.1016/j.foodchem.2014.09.098, 10.1080/00021369.1982.10865255, 10.1016/S0014-5793(02)03576-7	P	P	A	P	A	A	A	A	A	A	A	A
AIPPKKNQD	P02668	Kappa-casein	128-136	ACE-inhibitory	(1) Cushman and Cheung (1971) 19,9 ÂµM.	(1) Angiotensin I-converting enzyme inhibitory peptides in skim milk fermented with Lactobacillus helveticus 130B4 from camel milk in Inner Mongolia, China.	Quan, Shuang	10.1002/jsfa.3394	P	P	P	A	A	A	A	A	A	A	A	A
AMKPWIQPK	P02663	Alpha-S2-casein	204-212	ACE-inhibitory	(1) Cushman and Cheung (1971) 600 ÂµM.	(1) Identification of an Antihypertensive Peptide from Casein Hydrolysate Produced by a Proteinase from Lactobacillus helveticus CP790.	Maeno, Masafumi	10.3168/jds.S0022-0302(96)76487-1	P	P	P	A	A	A	A	A	A	A	A	A
IGSENSEKTTMP	P02662	Alpha-S1-casein	201-212	ACE-inhibitory	(1) Cushman and Cheung (1971) 773,1 ÂµM.	(1) Casein Fermentate of Lactobacillus animalisDPC6134 Contains a Range of Novel Propeptide Angiotensin-Converting Enzyme Inhibitors.	Hayes, M	10.1128/AEM.00096-07	P	A	P	A	A	A	A	A	A	A	A	A
YQEPVLGPVR	P02666	Beta-casein	208-217	ACE-inhibitory	(1) Cushman and Cheung (1971) 300 ÂµM.	(1) Angiotensin-I-converting enzyme-inhibitory peptides in commercial Wisconsin Cheddar cheeses of different ages.	Lu, Y	10.3168/jds.2015-9569	P	A	P	A	A	A	A	A	A	A	A	A
RPKHPIKHQ	P02662	Alpha-S1-casein	16-24	ACE-inhibitory	(1) Cushman and Cheung (1971) 13,4 ÂµM.	(1) Isolation and Structural Analysis of Antihypertensive Peptides That Exist Naturally in Gouda Cheese.	Saito, T	10.3168/jds.S0022-0302(00)75013-2	P	A	P	A	A	A	A	A	A	A	A	A
ALPMHIR	P02754	Beta-lactoglobulin	158-164	ACE-inhibitory	(1) Cushman and Cheung (1971) 14 ÂµM. , (2) Cushman and Cheung (1971) 42,6 ÂµM.	(1) Antihypertensive effect of the bovine casein-derived peptide Met-Lys-Pro. , (2) Identification of a novel angiotensin-I-converting enzyme inhibitory peptide corresponding to a tryptic fragment of bovine Beta-lactoglobulin.	Yamada, Akio, Mullally, Margaret	10.1016/j.foodchem.2014.09.098, 10.1016/S0014-5793(96)01503-7	A	A	P	A	A	A	A	A	A	A	A	A
SQSKVLPVPQ	P02666	Beta-casein	181-190	ACE-inhibitory	(1) Cushman and Cheung (1971) 92 ÂµM.	(1) Casein Fermentate of Lactobacillus animalisDPC6134 Contains a Range of Novel Propeptide Angiotensin-Converting Enzyme Inhibitors.	Hayes, M	10.1128/AEM.00096-07	A	A	P	A	A	A	A	A	A	A	A	A
DKIHPF	P02666	Beta-casein	62-67	ACE-inhibitory	(1) Cushman and Cheung (1971) 256,8 ÂµM.	(1) Production of Angiotensin-I-Converting-Enzyme-Inhibitory Peptides in Fermented Milks Started by Lactobacillus delbrueckii subsp bulgaricus SS1 and Lactococcus lactis subsp cremoris FT4.	Gobbetti, M	10.1128/AEM.66.9.3898-3904.2000	A	A	P	A	A	A	A	A	A	A	A	A
RDMPIQAF	P02666	Beta-casein	198-205	ACE-inhibitory	(1) Cushman and Cheung (1971) 209 ÂµM.	(1) Antihypertensive Effect of the Peptides Derived from Casein by an Extracellular Proteinase from Lactobacillus helveticus CP790.	Yamamoto, Naoyuki	10.3168/jds.S0022-0302(94)77026-0	A	A	P	A	A	A	A	A	A	A	A	A
EMPFPK	P02666	Beta-casein	123-128	ACE-inhibitory	(1) Cushman and Cheung (1971) 565,58 ÂµM.	(1) Angiotensin I Converting Enzyme Inhibitory Peptides Derived from Bovine Milk Proteins.	Pihlanto-Leppala, Anne	10.1016/S0958-6946(98)00048-X	A	A	A	A	A	A	A	A	P	A	P	A
LRLKKYKVPQL	P02662	Alpha-S1-casein	114-124	Antimicrobial	(1) MIC (96 Well) B. subtilis L. innocua L. monocytogenes C. freundii E. coli S. enteritidis S. typhmirium. , (2) 9 ÂµM.	(1) Isolation and characterisation of a novel antibacterial peptide from bovine alphaS1-casein. , (2) An antimicrobial peptide screened from casein hydrolyzate bySaccharomyces cerevisiae cell membrane affinity method.	McCann, KB, Tang, Wenting	10.1016/j.idairyj.2005.05.005, 10.1016/j.foodcont.2014.09.030	P	A	A	A	P	P	P	P	A	A	A	A
TKKTKLTEEEKNRL	P02663	Alpha-S2-casein	163-176	Antimicrobial	(1) MIC (Plate Pour) B. cereus S. aureus L. monocytogenes.	(1) StructureÃ»activity relationships of as-casein peptides with multifunctional biological activities.	Sistla, Srinivas	10.1007/s11010-013-1778-4	P	P	P	P	P	A	P	P	A	A	A	A
FSDKIAK	P02668	Kappa-casein	39-45	Antimicrobial	(1) log(N0/Nf) E. coli L. innocua S. carnosus.	(1) Identification of antibacterial peptides from bovine kappa-casein.	Lopez-Exposito, Ivan	N/A	A	A	A	A	A	A	P	P	A	A	A	A
LKKISQRYQKFALPQY	P02663	Alpha-S2-casein	179-194	Antimicrobial	(1) MIC (96 Well) E. coli L. innocua B. ceres M. flavus St. thermophilus.	(1) Identification of two distinct antibacterial domains within the sequence of bovine alphas2-casein.	Recio, Isidra	10.1016/S0304-4165(99)00079-3	A	A	P	A	P	P	A	P	A	A	A	A
AASDISLLDAQSAPLR	P02754	Beta-lactoglobulin	41-56	Antimicrobial	(1) log(N0/Nf) B. subtilis S. lentus S. zooepidemicus.	(1) Isolation and characterization of four bactericidal domains in the bovine beta-lactoglobulin.	Pellegrini, A	10.1016/S0304-4165(01)00116-7	A	A	A	A	A	A	A	P	A	A	A	A
RPKHPIKHQGLPQEVLNENLLRF	P02662	Alpha-S1-casein	16-38	Antimicrobial	(1) In vivo injection Staphylococcus aureus Streptococcus pyogenes Listeria monocytogenes. , (2) MIC (96 Well) E. coli - 0.2 C. sakazakii - 0.5.	(1) Antibacterial and immunostimulating casein-derived substances from milk: Casecidin, isracidin peptides. , (2) Antimicrobial activity of two peptides casecidin 15 and 17, found naturally in bovine colostrum.	Lahov, E, Birkemo, GA	10.1016/0278-6915(95)00097-6, 10.1111/j.1365-2672.2008.03996.x	P	P	P	P	A	A	A	A	A	A	A	A
TKVIPYVRYL	P02663	Alpha-S2-casein	213-222	Antimicrobial	(1) MIC (Agar Diffusion) C. sakazakii L. monocytogenes.	(1) Structure-activity relationship of synthetic variants of the milk-derived antimicrobial peptide alphas2-casein f(183-207).	Alvarez-Ordonez, Avelino	10.1128/AEM.01394-13	P	P	P	P	A	A	A	A	A	A	A	A
IDALNENK	P02754	Beta-lactoglobulin	100-107	Antimicrobial	(1) log(N0/Nf) L. monocytogenes S. aureus.	(1) Antibacterial activity of peptides extracted from tryptic hydrolyzate of whey protein by nanofiltration. , (2) Plasmin-digest of beta-lactoglobulin with antibacterial properties.	Demers-Mathieu, Veronique, Sedaghati, Marjaneh	10.1016/j.idairyj.2012.09.003, 10.1080/09540105.2014.893998	P	A	P	A	A	A	A	A	A	A	A	A
IQPKTKVIPYVR	P02663	Alpha-S2-casein	209-220	Antimicrobial	(1) MIC (96 Well) E. coli B. subtilis.	(1) Identification of novel antibacterial peptides isolated from a commercially available casein hydrolysate by autofocusing technique.	Elbarbary, Hend A	10.1002/biof.1023	A	A	P	A	A	A	A	A	A	A	A	A
HKEMPFPK	P02666	Beta-casein	121-128	Antimicrobial	(1) Gram negative.	(1) Isolation and identification of some antibacterial peptides in the plasmin-digest of beta-casein.	Sedaghati, Marjaneh	10.1016/j.lwt.2015.12.019	A	A	P	A	A	A	A	A	A	A	A	A
TPEVDDEALEK	P02754	Beta-lactoglobulin	141-151	Antimicrobial	(1) log(N0/Nf) L. monocytogenes S. aureus.	(1) Antibacterial activity of peptides extracted from tryptic hydrolyzate of whey protein by nanofiltration.	Demers-Mathieu, Veronique	10.1016/j.idairyj.2012.09.003	P	P	A	A	A	A	A	A	P	P	P	P
HIQKEDVPSERYLGYLEQLLRLK	P02662	Alpha-S1-casein	95-117	Antimicrobial	(1) MIC (96 Well) B. subtilis - 292 E. coli NEB 5Âµ - 292 E. coli ATCC 25922 - 584.	(1) Virtual screening of a milk peptide database for the identification of food-derived antimicrobial peptides.	Liu, Yufang	10.1002/mnfr.201500182	P	P	A	A	A	A	A	A	A	A	A	A
VLPVPQKAVPYPQR	P02666	Beta-casein	185-198	Antimicrobial	(1) Gram negative.	(1) Isolation and identification of some antibacterial peptides in the plasmin-digest of beta-casein.	Sedaghati, Marjaneh	10.1016/j.lwt.2015.12.019	A	P	A	A	A	A	A	A	A	A	A	A
VLVLDTDYK	P02754	Beta-lactoglobulin	108-116	Antimicrobial	(1) % Colonies Inhibited E. coli. , (2) log(N0/Nf) B. subtilis.	(1) Antibacterial peptides derived from caprine whey proteins, by digestion with human gastrointestinal juice. , (2) Isolation and characterization of four bactericidal domains in the bovine beta-lactoglobulin.	Almaas, Hilde, Pellegrini, A	10.1017/S0007114511001085, 10.1016/S0304-4165(01)00116-7	A	A	A	A	A	A	A	A	A	P	P	P
EMPFPK	P02666	Beta-casein	123-128	Antimicrobial	(1) Gram negative.	(1) Isolation and identification of some antibacterial peptides in the plasmin-digest of beta-casein.	Sedaghati, Marjaneh	10.1016/j.lwt.2015.12.019	A	A	A	A	A	A	A	A	P	A	P	A
YLGYLEQLLR	P02662	Alpha-S1-casein	106-115	Anxiolytic		(1) Bioactive peptides released by in vitro digestion of standard and hydrolyzed infant formulas.	Cakir-Kiefer, Celine	10.1021/jf202890e	A	A	P	A	A	A	A	A	A	A	A	A
EMPFPK	P02666	Beta-casein	123-128	Bradykinin-potentiating		(1) Biochemical and Pharmacological Aspects of Two Bradykinin-Potentiating Peptides Obtained from Tryptic Hydrolysis of Casein.	Perpetuo, Elen A	10.1023/B:JOPC.0000008724.98339.ff	A	A	A	A	A	A	A	A	P	A	P	A
RELEELNVPGEIVESLSSSEESITR	P02666	Beta-casein	16-40	Caseinophosphopeptide		(1) Potential Uses of Caseinophosphopeptides.	Fitzgerald, RJ	10.1016/S0958-6946(98)00068-5	P	P	P	P	A	A	A	A	A	A	A	A
LIVTQTMK	P02754	Beta-lactoglobulin	17-24	Cytotoxic	(1) mice splenocyte.	(1) Proliferative effects of synthetic peptides from beta-lactoglobulin and alpha-Lactalbumin on murine splenocytes.	Jacquot, Arnaud	10.1016/j.idairyj.2010.02.013	P	P	P	P	P	A	P	P	A	A	A	A
LKPTPEGDL	P02754	Beta-lactoglobulin	62-70	DPP-IV Inhibitory	(1) 45 ÂµM.	(1) Isolation and characterization of peptides with dipeptidyl peptidase-IV inhibitory activity from pepsin-treated bovine whey proteins.	Lacroix, Isabelle	10.1016/j.peptides.2014.01.002	P	P	P	A	P	P	P	P	P	P	P	P
LKALPMH	P02754	Beta-lactoglobulin	156-162	DPP-IV Inhibitory	(1) 193 ÂµM.	(1) Do whey protein-derived peptides have dual dipeptidyl-peptidase IV and angiotensin I-converting enzyme inhibitory activities?.	Lacroix, Isabelle	10.1016/j.jff.2015.11.038	P	A	P	A	P	P	P	P	A	A	A	A
IQKVAGTW	P02754	Beta-lactoglobulin	28-35	DPP-IV Inhibitory	(1) 329 ÂµM.	(1) Do whey protein-derived peptides have dual dipeptidyl-peptidase IV and angiotensin I-converting enzyme inhibitory activities?.	Lacroix, Isabelle	10.1016/j.jff.2015.11.038	A	A	P	A	P	P	P	P	A	A	A	A
IVQNNDSTEYGLF	P00711	Alpha-lactalbumin	60-72	DPP-IV Inhibitory	(1) 337 ÂµM.	(1) Isolation and characterization of peptides with dipeptidyl peptidase-IV inhibitory activity from pepsin-treated bovine whey proteins.	Lacroix, Isabelle	10.1016/j.peptides.2014.01.002	A	A	A	A	P	P	P	P	A	A	A	A
WLAHKALCSEKLDQ	P00711	Alpha-lactalbumin	123-136	DPP-IV Inhibitory	(1) 141 ÂµM.	(1) Isolation and characterization of peptides with dipeptidyl peptidase-IV inhibitory activity from pepsin-treated bovine whey proteins.	Lacroix, Isabelle	10.1016/j.peptides.2014.01.002	A	A	A	A	P	P	P	P	A	A	A	A
LKPTPEGDLEIL	P02754	Beta-lactoglobulin	62-73	DPP-IV Inhibitory	(1) 57 ÂµM.	(1) Isolation and characterization of peptides with dipeptidyl peptidase-IV inhibitory activity from pepsin-treated bovine whey proteins.	Lacroix, Isabelle	10.1016/j.peptides.2014.01.002	A	A	A	A	A	P	P	P	P	A	A	A
TKCEVFRE	P00711	Alpha-lactalbumin	23-30	DPP-IV Inhibitory	(1) 166 ÂµM.	(1) Isolation and characterization of peptides with dipeptidyl peptidase-IV inhibitory activity from pepsin-treated bovine whey proteins.	Lacroix, Isabelle	10.1016/j.peptides.2014.01.002	A	A	A	A	P	A	P	P	A	A	A	A
LKPTPEGDLE	P02754	Beta-lactoglobulin	62-71	DPP-IV Inhibitory	(1) 45 ÂµM.	(1) Isolation and characterization of peptides with dipeptidyl peptidase-IV inhibitory activity from pepsin-treated bovine whey proteins.	Lacroix, Isabelle	10.1016/j.peptides.2014.01.002	A	A	A	A	A	A	P	A	A	P	A	A
WLAHKAL	P00711	Alpha-lactalbumin	123-129	DPP-IV Inhibitory	(1) 286 ÂµM.	(1) Do whey protein-derived peptides have dual dipeptidyl-peptidase IV and angiotensin I-converting enzyme inhibitory activities?.	Lacroix, Isabelle	10.1016/j.jff.2015.11.038	A	A	A	A	P	P	A	A	A	A	A	A
TPEVDDEALEK	P02754	Beta-lactoglobulin	141-151	DPP-IV Inhibitory	(1) 319,5 ÂµM. , (2) 578,7 ÂµM.	(1) Dipeptidyl peptidase-IV inhibitory peptides generated by tryptic hydrolysis of a whey protein concentrate rich in beta-lactoglobulin. , (2) Selective enrichment of bioactive properties during ultrafiltration of a tryptic digest of beta-lactoglobulin.	Silveira, Silvana T, Power, O	10.1016/j.foodchem.2013.03.056, 10.1016/j.jff.2014.04.002	P	P	A	A	A	A	A	A	P	P	P	P
VLVLDTDYK	P02754	Beta-lactoglobulin	108-116	DPP-IV Inhibitory	(1) 424,4 ÂµM.	(1) Dipeptidyl peptidase-IV inhibitory peptides generated by tryptic hydrolysis of a whey protein concentrate rich in beta-lactoglobulin.	Silveira, Silvana T	10.1016/j.foodchem.2013.03.056	A	A	A	A	A	A	A	A	A	P	P	P
IPAVFKIDA	P02754	Beta-lactoglobulin	94-102	DPP-IV Inhibitory	(1) 191 ÂµM.	(1) Isolation and characterization of peptides with dipeptidyl peptidase-IV inhibitory activity from pepsin-treated bovine whey proteins.	Lacroix, Isabelle	10.1016/j.peptides.2014.01.002	A	A	A	A	A	A	A	A	A	A	P	A
EMPFPK	P02666	Beta-casein	123-128	Increase MUC4 expression		(1) beta-Casein(94-123)-derived peptides differently modulate production of mucins in intestinal goblet cells.	Plaisancie, Pascale	10.1017/S0022029914000533	A	A	A	A	A	A	A	A	P	A	P	A
VYPFPGPI	P02666	Beta-casein	74-81	PEP-inhibitory	(1) 110 ÂµM.	(1) Inhibition of prolyl endopeptidase by synthetic beta-casein peptides and their derivatives with a C-terminal prolinol or prolinal.	Asano, Minao	10.1271/bbb.56.976	A	A	A	A	A	A	A	A	P	P	P	A
VYPFPGPI	P02666	Beta-casein	74-81	prolyl endopeptidase-inhibitory		(1) Inhibition of Prolyl Endopeptidase by Synthetic beta-Casein Peptides and Their Derivatives with a C-Terminal Prolinol or Prolinal.	Asano, Minao	10.1271/bbb.56.976	A	A	A	A	A	A	A	A	P	P	P	A
ALPMHIR	P02754	Beta-lactoglobulin	158-164	Reduced vasoconstrictorendothelin-1 release	(1) Ã¡endothelial cells.	(1) Influence of the lactokinin Ala-Leu-Pro-Met-His-Ile-Arg (ALPMHIR) on the release of endothelin-1 by endothelial cells.	Maes, Wim	10.1016/j.regpep.2003.11.005	A	A	P	A	A	A	A	A	A	A	A	A
IDALNENK	P02754	Beta-lactoglobulin	100-107	stimulates proliferation	(1) mice splenocyte.	(1) Proliferative effects of synthetic peptides from beta-lactoglobulin and alpha-Lactalbumin on murine splenocytes.	Jacquot, Arnaud	10.1016/j.idairyj.2010.02.013	P	A	P	A	A	A	A	A	A	A	A	A
ALPMHIR	P02754	Beta-lactoglobulin	158-164	stimulates proliferation	(1) mice splenocyte.	(1) Proliferative effects of synthetic peptides from beta-lactoglobulin and alpha-Lactalbumin on murine splenocytes.	Jacquot, Arnaud	10.1016/j.idairyj.2010.02.013	A	A	P	A	A	A	A	A	A	A	A	A
