# Supplementary material for: Interactions between whey proteins and cranberry juice after thermal or non-thermal processing duringin vitrogastrointestinal digestion
Source: Royal Society of Chemistry journal article supplement (doi:10.1039/d0fo00177e), 2020-01-01
Supplement: d0fo00177e4.pdf [file d0fo00177e4.pdf]

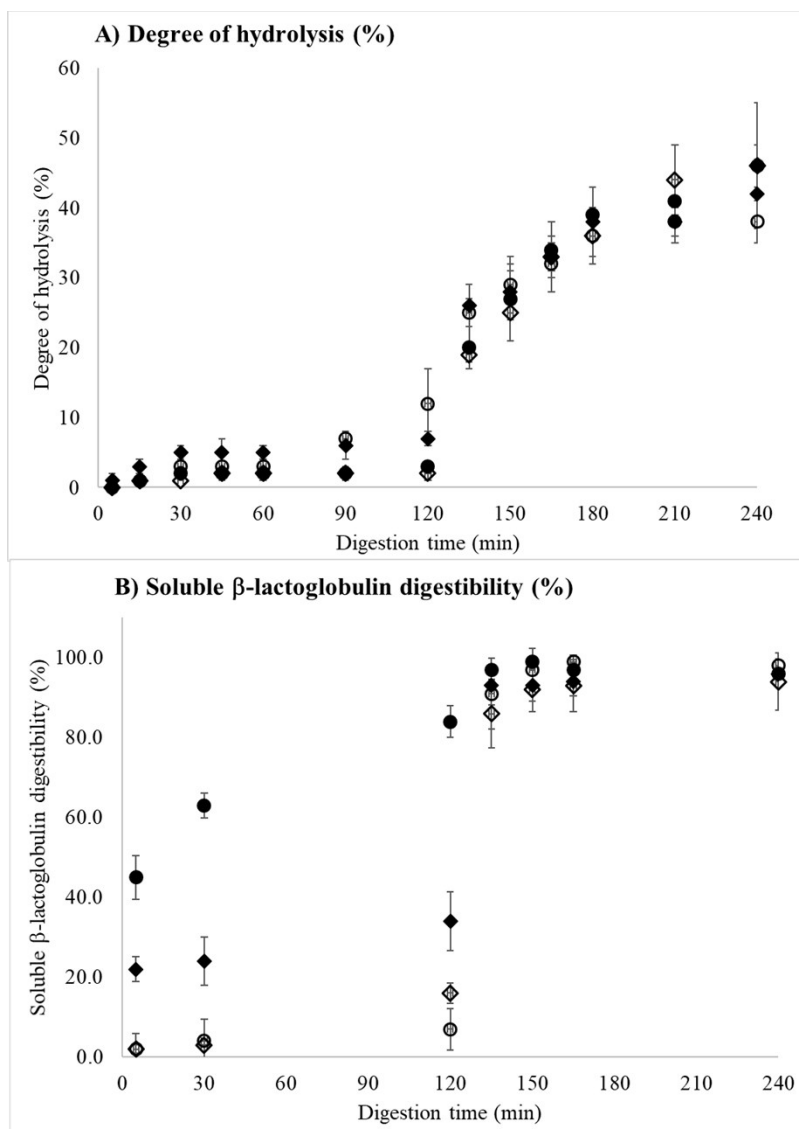

**Supplementary Figure 1.** Protein degree of hydrolysis (A) from OPA analysis and soluble  $\beta$ -lactoglobulin digestibility (B) from SDS-PAGE band analysis for selected treatments: 54 mg/mL water-protein solution, no processing (○), 54 mg/mL water-protein solution long thermal treatment (●), 54 mg/mL juice-protein solution, no processing (⊖), 54 mg/mL juice-protein solution long thermal treatment (◆). Values represent averages ( $n = 3$ ) and error bars are shown as standard deviation.
