# Supplementary figures and images for: Interactions between whey proteins and cranberry juice after thermal or non-thermal processing duringin vitrogastrointestinal digestion
Source: Royal Society of Chemistry journal article supplement (doi:10.1039/d0fo00177e), 2020-01-01

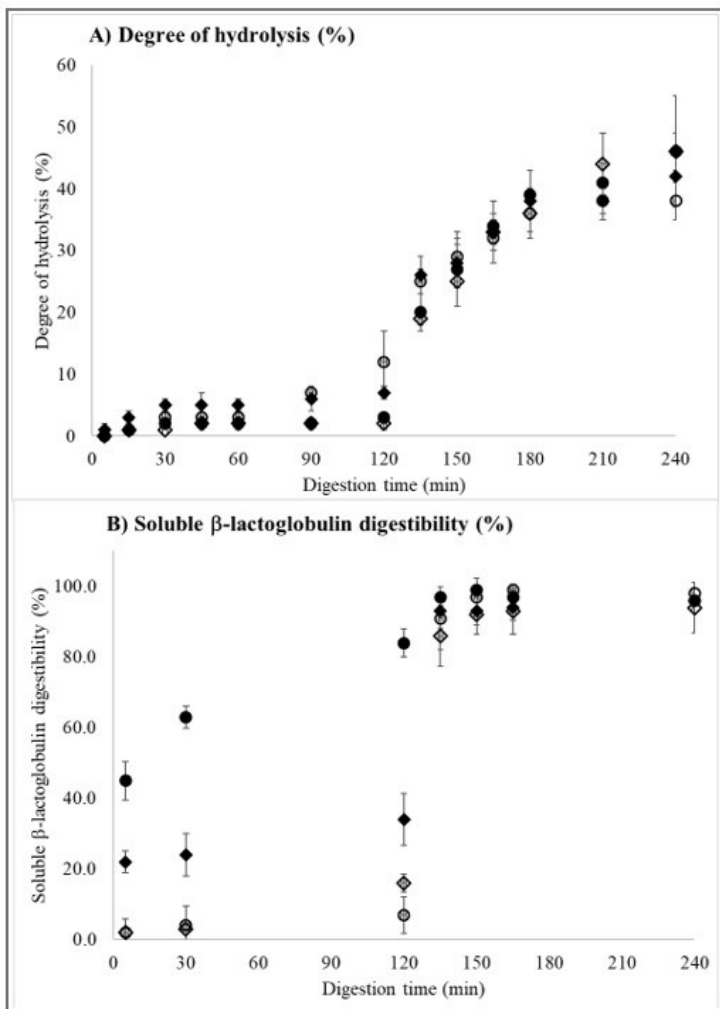

Supplement: d0fo00177e1.pdf [file d0fo00177e1.pdf]
